# Supplementary material for: Evaluating Statewide Wastewater Affordability for Users of Sewer Systems and Onsite Wastewater Treatment Systems Based on Household Incomes at the Census Tract Level
Source: Atypon-hosted journal article supplement (doi:10.1061/jwrmd5.wreng-6308), 2024-07-29
Supplement: supplemental materials_jwrmd5.wreng-6308_maxcy-brown.pdf [file supplemental%20materials_jwrmd5.wreng-6308_maxcy-brown.pdf]

## SUPPLEMENTAL MATERIALS

*ASCE Journal of Water Resources Planning and Management*

# Evaluating Statewide Wastewater Affordability for Users of Sewer Systems and Onsite Wastewater Treatment Systems Based on Household Incomes at the Census Tract Level

Jillian Maxcy-Brown, Mark A. Elliott, Mark O. Barnett, Katie  
Krummen, and Lacey Christian

**DOI:** 10.1061/JWRMD5.WRENG-6308

© ASCE 2024

[www.ascelibrary.org](http://www.ascelibrary.org)

### Background on EPA's Affordability Metric

When EPA developed their affordability metric, the key considerations were “(a) user burden (e.g. drinking water costs increase per household), (b) existence of financial assistance from other than water users, (c) knowledge that user burden alone as a criterion could act as a barrier against technology, and (d) difficulty for a system to install a technology that did not meet the affordability criteria” (U.S. EPA Science Advisory Board 1998). The EPA did consider (1) links between increases in household costs and MHI, (2) if there should be adjustments to account for other financial assistance, (3) if groundwater and surface water and public versus private systems should have different baselines, (4) if there are any other existing methods for estimating household annual water bills, (5) if consumption volume should be considered, (6) if there are additional mechanisms for estimating MHI, (7) whether the best measure is the mean or median household income, (8) if comparisons should occur across utilities, and (9) whether the most vulnerable are the residential users (U.S. EPA Science Advisory Board 1998).

In 1998, a Science Advisory Board for the EPA commented that defining affordability by MHI was not well explained, “questioned why the economic circumstances of less fortunate families was unimportant”, and stated that there was a lack of a clear conceptual framework which makes the affordability determination appear highly arbitrary (U.S. EPA Science Advisory Board 1998). In addition to the Science Advisory Board's report in 2002 (U.S. EPA Science Advisory Board 2002), the National Drinking Water Advisory Council gave recommendations in 2003 (U.S. EPA National Drinking Water Advisory Council 2003), but these two advisory committees presented some conflicting recommendations. The EPA ended up releasing a proposal to revise the affordability criteria which included a relaxation of the 2.5% threshold to focus on economic

feasibility of large public water systems (Belzer 2020; U.S. EPA 2006). This proposal was met with criticism and no revisions have been finalized (Belzer 2020).

#### Specific Notes on the GIS Mapping Methodology

- The shapefiles with the census tracts, incorporated areas, and cities/places for Alabama were added and projected using NAD 1983 State Plane Alabama East FIPS 0101 Feet.
- Selected polygons were used from “2016 City Limits and Places (Census Data)” shapefile for the census-designated places and a shapefile was created to estimate the area of the Poarch Creek Indian Reservation.
- The ArcToolbox Conversion tool was used to turn the Microsoft Excel files with utility rate data and household income data into tables compatible with ArcMap.
- The ArcToolbox Split tool was used to divide the sewer polygons along the boundaries of the census tracts.
- We added a new field to the attribute table for estimating the percentage of MHI spent on annual sewer and OWTS expenses. We used the ArcMap tool Calculate Geometry to populate this field with the corresponding monthly wastewater expenses multiplied by twelve, divided by the census tract’s annual MHI, and multiplied by 100. We used Symbology, a map of wastewater expenses as a percentage of annual income was generated to determine areas where households have unaffordable wastewater expenses. The data were classified into four manual breaks using intervals less than 1.00%, 1.00% to 1.99 %, 2.00 % to 2.49 %, and  $\geq 2.50\%$ .

#### Assigning Utility Service Areas and Rates

In Baldwin County (the second fastest growing Alabama county), no utility has exclusive right to provide sewer and water; because numerous utilities may operate in a single

municipality, each municipality was assigned the rates for the municipal utility or the private utility with the largest quantity of listed customers in that municipality on their NPDES permit. In Jefferson County (the most populous Alabama county, which includes the city of Birmingham), municipalities that are partially served by Jefferson County Sewer, a municipal sewer utility and/or a private sewer utility were assigned the municipal utility's lower sewer rates.

The City of Taylor currently has a wastewater treatment plant under construction and their NPDES permit documents mention that their sewer currently goes to a neighboring city for treatment, so this municipality was assigned the rates for Dothan. Mobile County Water, Sewer, and Fire Protection Authority was assigned to census tracts in Mobile County that are not served by other sewer utilities and have population equivalent to the served population reported on UNC Dashboard. There were two census tracts removed that had zero land area (located over Mobile Bay). There was one census tract in Etowah County that was missing its geocoding value, so it was unable to be matched to income data. However, Census Tract 107 in the income data spreadsheet did not match to a geocoded value in the census tract shapefile and is also in Etowah County so it was assumed that these two should be matched.

#### *Estimating Number of Households in each Sewered Polygon*

Under certain circumstances, there were specific deviations utilized to accurately distribute households to polygons including (1) assigning the quantity of households based on the census tract area for census tracts with roughly 1,000 households, (2) using the estimated number of households based on the polygon's percentage of municipality area for utilities with fewer than six polygons or fewer than 2,000 households, (3) assigning entire census tract populations to polygons that were >85% of the census tract area, (4) assigning the polygons' household

quantities based solely on their percentage of the census tract area for census tracts that had more than one municipality, and (5) assigning polygons' entire census tract populations when necessary for large municipalities to reflect the utility's estimated service populations. If there were any unassigned households serviced by a utility, then they were distributed among the polygons for that municipality.

### Results for Supplemental Figures

When analyzing wastewater affordability with OWTS represented as lump sum of capital costs (Figure S2), conventional systems are only affordable for households with median incomes greater than or equal to \$200,000 and mound systems are only affordable for households with median incomes greater than or equal to \$800,000. Therefore, there are no census tracts where OWTS would be affordable as a lump sum based on the MHI. There are six census tracts where households use OWTS, but the MHI is less than the capital cost of OWTS (See Table S4). These are all located in Black Belt counties (Montgomery, Dallas, Perry, and Wilcox). There are 73 census tracts with households outside of sewer service areas where the capital cost of OWTS is greater than 50% of the annual MHI (See Table S4).

When analyzing wastewater affordability with OWTS represented as the average annual cost to pump the tank every five years (Figure S3), the only areas with census tracts wastewater costs exceeding 2.5% of MHI are those serviced by sewer utilities. The situation illustrated in Figure S3 reflects a case in which the capital costs of OWTS are completely subsidized (e.g., by a grant). While no existing federal program will pay up to the \$20,000 in capital costs required for advanced OWTS, the possible effects of some existing federal and state programs are discussed in the Discussion.

When analyzing wastewater affordability with OWTS represented as lump sum of capital costs (Figure S4, Table 2), as previously mentioned, conventional systems would only be considered affordable for households with annual incomes greater than or equal to \$200,000 and mound systems are only affordable for households with annual incomes greater than or equal to \$800,000. Across Alabama, there are estimated to be 644,234 households with unaffordable access to OWTS when paying for the systems as a lump sum of capital costs. Of these households, 89.5% (576,830 households) are assumed to need a conventional system and 10.5% (67,404 households) are assumed to need a mound system (See Table 2).

#### Impacts of COVID-19 Pandemic on the Affordability of Wastewater Access:

Due to the use of data primarily from 2019, the COVID-19 pandemic's effects on wastewater rates were excluded from the primary discussion. However, possible effects of the COVID-19 pandemic on wastewater utilities should be considered in future affordability studies. The economic impacts of the COVID-19 pandemic will continue to exacerbate affordability challenges. In a report published by the AWWA discussing the financial impact the pandemic had on water utilities, they point out that many things that impact water utilities will also impact sewer utilities. The delayed collection of delinquent accounts, loss of non-residential customers, stopping service shut-offs, and changing operational policies will also greatly impact wastewater utilities in the years to come (AWWA and Association of Metropolitan Water Agencies 2020). After discussing the reports' findings, AWWA suggested there may be a combined impact on current and future revenue for water and wastewater utilities totaling up to \$15.5 billion (AWWA and Association of Metropolitan Water Agencies 2020). Depending on how utilities aim to earn back the revenue lost during the COVID-19 pandemic, there could be many water and wastewater rate increases implemented as the pandemic recedes.

**Table S1: Summary of Findings from Select Previous Affordability Studies**

| Study Year                         | Affordability Indicator                                    | Scope                                                   | Key Findings                                                                                                                                                                                                                                                                                                                                                                                                                                                                                                                                                                                  | Limitations                                                                                                                                                                                                                                                                                                                                                                                                                                                                                                                                         |
|------------------------------------|------------------------------------------------------------|---------------------------------------------------------|-----------------------------------------------------------------------------------------------------------------------------------------------------------------------------------------------------------------------------------------------------------------------------------------------------------------------------------------------------------------------------------------------------------------------------------------------------------------------------------------------------------------------------------------------------------------------------------------------|-----------------------------------------------------------------------------------------------------------------------------------------------------------------------------------------------------------------------------------------------------------------------------------------------------------------------------------------------------------------------------------------------------------------------------------------------------------------------------------------------------------------------------------------------------|
| 2000<br>(Wescoat et al. 2007)      | Complete Plumbing and Poverty Rate                         | National<br><br>Case Study of Census Tracts in Colorado | Numerous low-income water programs available nationwide<br><br>Spatial variability in populations lacking access to complete plumbing<br><br>International perspective is inaccurate for water and wastewater access in the U.S.                                                                                                                                                                                                                                                                                                                                                              | Primarily a qualitative study<br><br>U.S. Census Bureau data is limited for plumbing and poverty<br><br>Evaluating financial ability to gain access to adequate plumbing not specifically the affordability of wastewater services                                                                                                                                                                                                                                                                                                                  |
| 2014<br>(Mack and Wrase 2017)      | Median Household Income and Rate Data from National Survey | National<br><br>Census Tracts by State                  | Household of four people consuming 378.5 liters (100 gallons) per person per day would need an annual income of at least \$32,000 to have affordable water and sewer bills which results in 11.9% of all households in the continental U.S. having unaffordable water and sewer bills<br><br>Predicts that it could increase to 35.6% by 2022 based on conservative estimates of rate increases that will have disproportionate impacts on communities across the country                                                                                                                     | Rate data from American Water Works Association (AWWA) biennial survey which has sampling bias<br><br>Rate data for 296 utilities nationwide<br><br>Must use averages from provided consumption tiers as indicators of costs for providers outside of the survey                                                                                                                                                                                                                                                                                    |
| 2017<br>(Teodoro 2018)             | Affordability Ratio, Utility Rate Data, and Minimum Wage   | National<br><br>Four Census Regions                     | $\text{Affordability Ratio} = \frac{\text{cost of basic water} + \text{sewer service}}{\text{household income} - \text{essential nonwater costs}}$<br><br>Compares impacts on affordability of other variables such as system ownership, population served by system, regulatory violations, college graduation rates, and race<br><br>Low-income household (20 <sup>th</sup> percentile) use 9.7% of their disposable income (9.5 hours at minimum wage) on basic water and sewer services                                                                                                   | Random sample of 360 utilities nationwide<br><br>Only evaluated water use for drinking, cooking, cleaning, and sanitation<br><br>Does not evaluate private wells or septic systems<br><br>This study focuses on the correlation of different variables with the affordability ratio as predictors for affordability challenges without fully establishing what the values' implications are for water and sewer affordability                                                                                                                       |
| 2019<br>(Teodoro and Saywitz 2020) | Affordability Ratio, Utility Rate Data, and Minimum Wage   | National<br><br>Four Census Regions                     | Low-income households spend 12.4% of their disposable income and/or 10.1 hours working at minimum wage for basic water and sewer monthly bills<br><br>Utility size has shifted from being strongly correlated with both measures to only having significant correlation with the hours spent working at minimum wage which indicated increasingly acute affordability challenges for large systems<br><br>The changes are possibly due to an increase in essential expenses that are not for water or sewer bills and a decline in 20 <sup>th</sup> percentile income in parts of the country | Removed systems serving fewer than 3,300 people due to difficulties collecting data and the thought that they collectively serve a small proportion of the U.S. population<br><br>Data only covered 44 million customers and uses 414 utilities for rate data<br><br>The use of minimum wage is a somewhat arbitrary indicator because it represents small percentage of wage earners in the U.S., does not account for multi-income households, and excludes those living on low incomes from other sources such as disability or retirement funds |

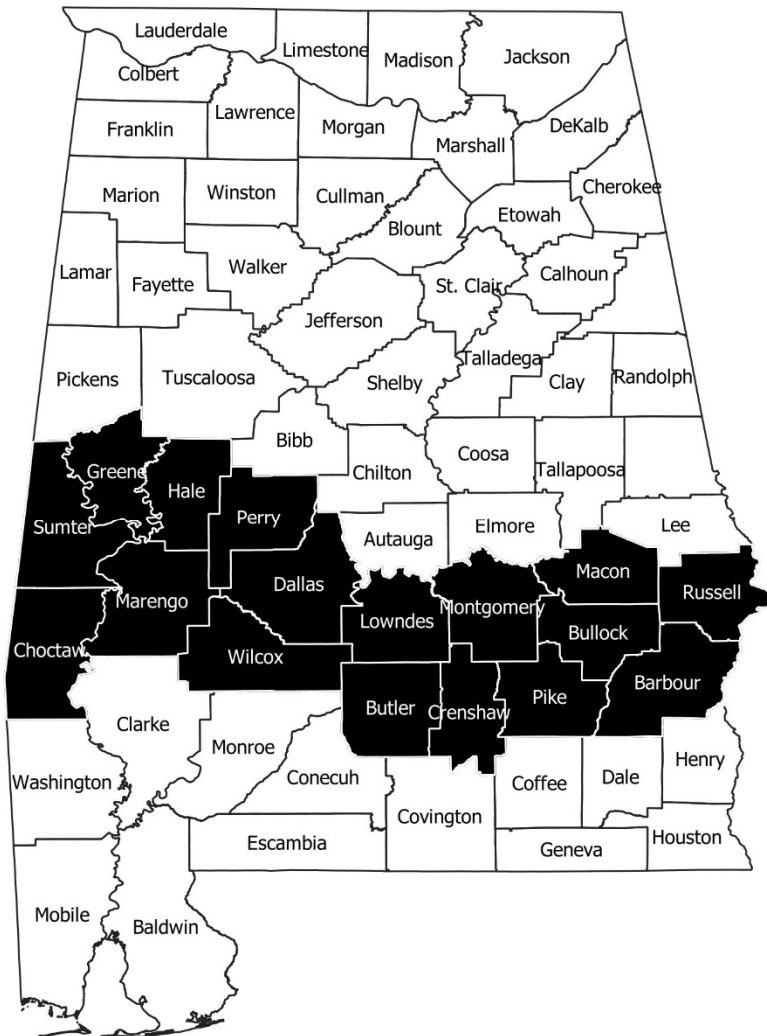

**Fig. S1: Alabama Black Belt Counties**



**Table S2: Alabama Wastewater Utilities**

| NPDES ID              | Utility or Permit Name                                       | Ownership Type | County  | Service Area     | Estimated Service Population | Date Rates Effective or Obtain | Monthly Sewer Bill for 6,000 gallons or 802 cf | Utility Data Source | Rate Data Source | Estimated Service Population Source |
|-----------------------|--------------------------------------------------------------|----------------|---------|------------------|------------------------------|--------------------------------|------------------------------------------------|---------------------|------------------|-------------------------------------|
| AL0026654 & AL0027723 | City of Prattville                                           | Municipality   | Autauga | Prattville       | 35317                        | 5/1/2018                       | \$ 32.90                                       | A                   | A                | B                                   |
| N/A                   | OWTS                                                         | Homeowner      | Autauga | Billingsley      | N/A                          | N/A                            | N/A                                            | G                   | K                | L                                   |
| AL0057720             | Town of Autaugaville                                         | Municipality   | Autauga | Autaugaville     | 855                          | 1/1/2019                       | \$ 35.75                                       | A                   | A                | B                                   |
| AL0078034 & AL0070904 | Baldwin County Sewer Service, LLC                            | Private        | Baldwin | Silverhill       | 29308                        | 3/13/2023                      | \$ 54.50                                       | B & E               | E                | B                                   |
| AL0078034 & AL0070904 | Baldwin County Sewer Service, LLC                            | Private        | Baldwin | Elberta          | 29308                        | 3/13/2023                      | \$ 54.50                                       | B & E               | E                | B                                   |
| AL0042234             | Baldwin County Sewer Service, LLC                            | Private        | Baldwin | Spanish Fort     | 29308                        | 3/13/2023                      | \$ 54.50                                       | B & E               | E                | B                                   |
| AL0083470             | Baldwin County Sewer Service, LLC- Summerdale                | Municipality   | Baldwin | Summerdale       | 1000                         | 1/1/2014                       | \$ 60.00                                       | A & E               | A                | B                                   |
| AL0020842             | City of Fairhope                                             | Municipality   | Baldwin | Fairhope         | 29514                        | 1/1/2019                       | \$ 30.02                                       | A                   | A                | B                                   |
| AL0042838             | City of Robertsedale                                         | Municipality   | Baldwin | Robertsedale     | 6250                         | 10/2/2017                      | \$ 34.72                                       | A                   | A                | B                                   |
| AL0027448 & AL0049867 | North Baldwin Utilities- Bay Minette                         | Not For Profit | Baldwin | Bay Minette      | 8500                         | 10/1/2017                      | \$ 26.70                                       | A                   | A                | B                                   |
| AL0081124             | Orange Beach Sewer Department                                | Municipality   | Baldwin | Orange Beach     | 8347                         | 3/8/2023                       | \$ 28.00                                       | E                   | E                | J                                   |
| N/A                   | OWTS                                                         | Homeowner      | Baldwin | Magnolia Springs | N/A                          | N/A                            | N/A                                            | I                   | K                | L                                   |
| N/A                   | OWTS                                                         | Homeowner      | Baldwin | Perdido          | N/A                          | N/A                            | N/A                                            | G                   | K                | L                                   |
| N/A                   | Perdido Bay Water, Sewer & Fire Protection                   | Nonprofit      | Baldwin | Perdido Beach    | 562                          | 8/23/2021                      | \$ 42.20                                       | E                   | E                | J                                   |
| AL0049042             | The Utilities Board of the City of Foley (Riviera Utilities) | Not For Profit | Baldwin | Foley            | 24569                        | 4/1/2018                       | \$ 44.90                                       | A                   | A                | B                                   |
| AL0060283             | Town of Loxley                                               | Municipality   | Baldwin | Loxley           | 1837                         | 10/1/2018                      | \$ 27.59                                       | A                   | A                | B                                   |
| AL0027561             | Utilities Board of the City of Daphne                        | Not For Profit | Baldwin | Daphne           | 26000                        | 10/1/2015                      | \$ 48.55                                       | A                   | A                | B                                   |
| AL0055841             | Utilities Board of the City of Gulf Shores                   | Municipality   | Baldwin | Gulf Shores      | 10963                        | 1/1/2021                       | \$ 24.75                                       | A                   | C                | B                                   |
| AL0067181             | City of Clio                                                 | Municipality   | Barbour | Clio             | 1500                         | 6/1/2015                       | \$ 20.00                                       | A                   | A                | B                                   |
| N/A                   | OWTS                                                         | Homeowner      | Barbour | Blue Springs     | N/A                          | N/A                            | N/A                                            | I                   | K                | L                                   |
| N/A                   | OWTS                                                         | Homeowner      | Barbour | Bakerhill        | N/A                          | N/A                            | N/A                                            | G                   | K                | L                                   |
| AL0061671             | The Water Works and Sewer Board of the City of Eufaula       | Municipality   | Barbour | Eufaula          | 12000                        | 3/1/2017                       | \$ 34.69                                       | A                   | A                | B                                   |
| AL0060461             | Town of Clayton Water and Sewer Board                        | Not For Profit | Barbour | Clayton          | 3100                         | 6/1/2016                       | \$ 12.58                                       | A                   | A                | B                                   |
| AL0070980             | Town of Louisville                                           | Municipality   | Barbour | Louisville       | 410                          | 5/1/2017                       | \$ 18.00                                       | A                   | A                | B                                   |
| AL0044857             | Brent Utilities Board                                        | Not For Profit | Bibb    | Brent            | 2721                         | 11/1/2018                      | \$ 23.19                                       | A                   | A                | B                                   |
| AL0044857             | Centreville Water and Sewer                                  | Municipality   | Bibb    | Centreville      | 1974                         | 11/1/2018                      | \$ 23.19                                       | A & B               | A                | B                                   |
| N/A                   | OWTS                                                         | Homeowner      | Bibb    | Woodstock        | N/A                          | N/A                            | N/A                                            | G                   | K                | L                                   |
| AL0074195             | Town of West Blocton                                         | Municipality   | Bibb    | West Blocton     | 921                          | 10/1/2017                      | \$ 44.00                                       | A                   | A                | B                                   |

|           |                                                        |                 |                   |               |       |           |          |       |       |   |
|-----------|--------------------------------------------------------|-----------------|-------------------|---------------|-------|-----------|----------|-------|-------|---|
| AL0053643 | Blountsville Utility Board                             | Not For Profit  | Blount            | Blountsville  | 1707  | 10/5/2011 | \$ 40.10 | A     | A & C | B |
| N/A       | OWTS                                                   | Homeowner       | Blount            | Nectar        | N/A   | N/A       | N/A      | B & I | K     | L |
| N/A       | OWTS                                                   | Homeowner       | Blount            | Allgood       | N/A   | N/A       | N/A      | G     | K     | L |
| N/A       | OWTS                                                   | Homeowner       | Blount            | Highland Lake | N/A   | N/A       | N/A      | G     | K     | L |
| N/A       | OWTS                                                   | Homeowner       | Blount            | Locust Fork   | N/A   | N/A       | N/A      | G     | K     | L |
| N/A       | OWTS                                                   | Homeowner       | Blount            | Rosa          | N/A   | N/A       | N/A      | G     | K     | L |
| N/A       | OWTS                                                   | Homeowner       | Blount            | Susan Moore   | N/A   | N/A       | N/A      | G     | K     | L |
| AL0073261 | Town of Cleveland                                      | Municipality    | Blount            | Cleveland     | 1300  | 10/1/2018 | \$ 57.86 | A     | A     | B |
| AL0058572 | Town of Snead                                          | Municipality    | Blount            | Snead         | 748   | 1/1/2019  | \$ 22.60 | A     | A     | B |
| AL0076261 | West Blount Sewer System                               | County District | Blount            | Hayden        | 2000  | 3/31/2023 | \$ 62.00 | B     | C     | B |
| AL0049549 | Utilities Board of the City of Oneonta                 | Not For Profit  | Blount            | Oneonta       | 6700  | 1/1/2018  | \$ 51.77 | A     | A     | B |
| N/A       | OWTS                                                   | Homeowner       | Blount, Jefferson | County Line   | N/A   | N/A       | N/A      | I     | K     | L |
| AL0070726 | Town of Midway                                         | Municipality    | Bullock           | Midway        | 499   | 1/1/2019  | \$ 34.45 | A     | A     | B |
| AL0060445 | Union Springs Utilities Board                          | Not For Profit  | Bullock           | Union Springs | 4800  | 10/1/2007 | \$ 18.06 | A     | A & C | B |
| AL0043532 | The Water Works & Sewer Board of the City of Georgiana | Municipality    | Butler            | Georgiana     | 1700  | 4/1/2018  | \$ 37.00 | B     | C     | B |
| AL0020532 | Water Works and Sewer Board of the City of Greenville  | Not For Profit  | Butler            | Greenville    | 2800  | 10/1/2016 | \$ 37.32 | A     | A     | B |
| N/A       | OWTS                                                   | Homeowner       | Butler, Conecuh   | McKenzie      | N/A   | N/A       | N/A      | G     | K     | L |
| AL0022586 | Jacksonville Water Works, Gas and Sewer Board          | Municipality    | Calhoun           | Jacksonville  | 12651 | 3/1/2018  | \$ 27.84 | A     | A     | B |
| N/A       | OWTS                                                   | Homeowner       | Calhoun           | Ohatchee      | N/A   | N/A       | N/A      | G     | K     | L |
| N/A       | OWTS                                                   | Homeowner       | Calhoun           | Weaver        | N/A   | N/A       | N/A      | G     | K     | L |
| AL0022195 | The Water Works & Sewer Board of the City of Anniston  | Municipality    | Calhoun           | Anniston      | 18000 | 4/1/2018  | \$ 24.68 | A     | A     | B |
| AL0022195 | The Water Works & Sewer Board of the City of Anniston  | Municipality    | Calhoun           | HoBon City    | 400   | 4/1/2018  | \$ 24.68 | A & B | A     | B |
| AL0058408 | Water Works & Sewer Board of the City of Oxford        | Municipality    | Calhoun           | Oxford        | 10426 | 10/1/2018 | \$ 16.98 | A     | A     | B |
| AL0024376 | Piedmont Water Works                                   | Municipality    | Calhoun, Cherokee | Piedmont      | 3381  | 3/10/2023 | \$ 20.25 | E     | D     | D |
| AL0062839 | City of LaFayette Water & Wastewater                   | Municipality    | Chambers          | La Fayette    | 3500  | 1/1/2011  | \$ 33.74 | A     | A & C | B |
| AL0023159 | City of Lanett                                         | Municipality    | Chambers          | Lanett        | 6236  | 1/1/2021  | \$ 20.02 | A     | C     | B |
| AL0024724 | East Alabama Water, Sewer and Fire Protection District | County District | Chambers          | Valley        | 10000 | 10/1/2016 | \$ 41.50 | A     | A     | B |
| N/A       | OWTS                                                   | Homeowner       | Chambers          | Fredonia      | N/A   | N/A       | N/A      | I     | K     | L |
| N/A       | OWTS                                                   | Homeowner       | Chambers          | Cusseta       | N/A   | N/A       | N/A      | G     | K     | L |
| N/A       | OWTS                                                   | Homeowner       | Chambers          | Five Points   | N/A   | N/A       | N/A      | G     | K     | L |
| N/A       | OWTS                                                   | Homeowner       | Chambers, Lee     | Waverly       | N/A   | N/A       | N/A      | G     | K     | L |
| AL0057592 | Cherokee County Water and Sewer Authority              | Authority       | Cherokee          | Leesburg      | 241   | 1/1/2014  | \$ 29.46 | A & B | A     | B |
| N/A       | OWTS                                                   | Homeowner       | Cherokee          | Sand Rock     | N/A   | N/A       | N/A      | I     | K     | L |
| N/A       | OWTS                                                   | Homeowner       | Cherokee          | Gaylesville   | N/A   | N/A       | N/A      | G     | K     | L |

|                       |                                                         |                |          |               |       |            |          |       |       |   |
|-----------------------|---------------------------------------------------------|----------------|----------|---------------|-------|------------|----------|-------|-------|---|
| AL0024678             | The Utilities Board of the Town of Cedar Bluff          | Not For Profit | Cherokee | Cedar Bluff   | 2350  | 9/9/2018   | \$ 33.77 | A     | A     | B |
| AL0062723             | Water Works & Sewer Board of the Town of Centre         | Municipality   | Cherokee | Centre        | 5000  | 7/1/2018   | \$ 34.89 | A     | A     | B |
| AL0054631             | Clanton Water Works and Sewer Board                     | Not For Profit | Chilton  | Clanton       | 6100  | 12/1/2016  | \$ 22.25 | A     | A     | B |
| AL0059331             | Living Water Utilities, LLC-Jemison                     | Municipality   | Chilton  | Jemison       | 1100  | 3/17/2018  | \$ 32.40 | A     | A     | B |
| AL0070858             | Maplesville Utility Board                               | Not For Profit | Chilton  | Maplesville   | 450   | 5/1/2018   | \$ 59.01 | A     | A     | B |
| AL0050636             | Town of Thorsby                                         | Municipality   | Chilton  | Thorsby       | 1200  | 7/1/2018   | \$ 18.86 | A     | A     | B |
| AL0073270             | North Choctaw Water and Sewer Authority                 | Authority      | Choctaw  | Lisman        | 580   | 1/1/2019   | \$ 46.64 | A & B | A     | B |
| N/A                   | OWTS                                                    | Homeowner      | Choctaw  | Needham       | N/A   | N/A        | N/A      | I     | K     | L |
| N/A                   | OWTS                                                    | Homeowner      | Choctaw  | Silas         | N/A   | N/A        | N/A      | I     | K     | L |
| N/A                   | OWTS                                                    | Homeowner      | Choctaw  | Toxey         | N/A   | N/A        | N/A      | I     | K     | L |
| AL0050211             | Utilities Board of the Town of Butler                   | Municipality   | Choctaw  | Butler        | 1860  | 7/22/2014  | \$ 20.50 | A     | A     | B |
| AL0082848             | Utilities Board of the Town of Gilbertown               | Municipality   | Choctaw  | Gilbertown    | 187   | 1/1/2021   | \$ 45.60 | B     | C     | B |
| AL0075701             | Utilities Board of the Town of Pennington               | Municipality   | Choctaw  | Pennington    | 221   | 6/18/2009  | \$ 39.00 | A     | A & C | B |
| AL0056022             | City of Thomasville Water Works and Sewer Board         | Municipality   | Clarke   | Thomasville   | 4700  | 10/1/2018  | \$ 24.88 | A     | A     | B |
| N/A                   | Fulton                                                  | Municipality   | Clarke   | Fulton        | 221   | 1/1/2019   | \$ 37.50 | A     | A     | J |
| AL0020869             | Jackson Water Works & Sewer Board                       | Not For Profit | Clarke   | Jackson       | 5500  | 11/1/2017  | \$ 31.00 | A     | A     | B |
| AL0044547             | Town of Coffeeville                                     | Not For Profit | Clarke   | Coffeeville   | 100   | 1/1/2019   | \$ 45.00 | A     | A     | B |
| AL0026891             | Utilities Board of the Town of Grove Hill               | Not For Profit | Clarke   | Grove Hill    | 1500  | 10/1/2017  | \$ 32.88 | A     | A     | B |
| AL0050644             | Waterworks & Sewer Board of the City of Lineville       | Municipality   | Clay     | Lineville     | 2489  | 1/1/2018   | \$ 29.77 | A     | A     | B |
| AL0020141             | Waterworks and Sewer Board of the City of Ashland       | Municipality   | Clay     | Ashland       | 2000  | 1/1/2019   | \$ 24.74 | A     | A     | B |
| AL0056146             | Heflin Water Works and Sewer Board                      | Municipality   | Cleburne | Heflin        | 1775  | 1/1/2018   | \$ 25.50 | A     | A     | B |
| N/A                   | OWTS                                                    | Homeowner      | Cleburne | Edwardsville  | N/A   | N/A        | N/A      | G     | K     | L |
| N/A                   | OWTS                                                    | Homeowner      | Cleburne | Fruithurst    | N/A   | N/A        | N/A      | G     | K     | L |
| N/A                   | OWTS                                                    | Homeowner      | Cleburne | Ranburne      | N/A   | N/A        | N/A      | G     | K     | L |
| AL0020940             | City of Elba                                            | Municipality   | Coffee   | Elba          | 1250  | 10/1/2017  | \$ 18.75 | A     | A     | B |
| AL0020036 & AL0020061 | City of Enterprise                                      | Municipality   | Coffee   | Enterprise    | 22700 | 10/1/2018  | \$ 13.42 | A     | A     | B |
| AL0055875             | Water Works and Sewer Board of the Town of New Brockton | Not For Profit | Coffee   | New Brockton  | 900   | 10/1/2015  | \$ 34.17 | A     | A     | B |
| AL0057100             | City of Tuscumbia Department of Utilities               | Municipality   | Colbert  | Tuscumbia     | 8400  | 1/1/2019   | \$ 18.05 | A     | A     | B |
| AL0024180             | Muscle Shoals Utilities Board                           | Municipality   | Colbert  | Muscle Shoals | 16000 | 11/1/2017  | \$ 40.25 | A     | A     | B |
| AL0050121             | Sheffield Utilities                                     | Municipality   | Colbert  | Sheffield     | 9300  | 1/1/2021   | \$ 43.74 | A     | A     | B |
| AL0022594             | Town of Cherokee                                        | Not For Profit | Colbert  | Cherokee      | 1004  | 12/22/2014 | \$ 42.00 | A     | A     | B |
| AL0056278             | Town of Littleville                                     | Municipality   | Colbert  | Littleville   | 987   | 3/1/2018   | \$ 38.62 | A     | A     | B |

|                       |                                                        |                |           |                |       |           |          |       |       |   |
|-----------------------|--------------------------------------------------------|----------------|-----------|----------------|-------|-----------|----------|-------|-------|---|
| AL0071901             | Water and Sewer Board of the Town of Leighton          | Municipality   | Colbert   | Leighton       | 725   | 1/1/2021  | \$ 29.49 | B     | C     | B |
| AL0047503             | City of Evergreen                                      | Municipality   | Conecuh   | Evergreen      | 3300  | 10/1/2013 | \$ 32.00 | A     | A & C | B |
| N/A                   | OWTS                                                   | Homeowner      | Conecuh   | Repton         | N/A   | N/A       | N/A      | I     | K     | L |
| N/A                   | OWTS                                                   | Homeowner      | Conecuh   | Castleberry    | N/A   | N/A       | N/A      | G     | K     | L |
| AL0023582             | Goodwater Water Works and Sewer Board                  | Not For Profit | Coosa     | Goodwater      | 1522  | 4/1/2013  | \$ 32.60 | A     | A     | B |
| N/A                   | OWTS                                                   | Homeowner      | Coosa     | Kellyton       | N/A   | N/A       | N/A      | G     | K     | L |
| AL0062278             | Rockford Utilities Board                               | Not For Profit | Coosa     | Rockford       | 273   | 7/1/2018  | \$ 21.00 | A     | A     | B |
| AL0031925             | Floral Utilities Board                                 | Not For Profit | Covington | Floral         | 2800  | 10/1/2018 | \$ 24.00 | A     | A     | B |
| N/A                   | OWTS                                                   | Homeowner      | Covington | Gantt          | N/A   | N/A       | N/A      | I     | K     | L |
| N/A                   | OWTS                                                   | Homeowner      | Covington | Kinston        | N/A   | N/A       | N/A      | I     | K     | L |
| N/A                   | OWTS                                                   | Homeowner      | Covington | River Falls    | N/A   | N/A       | N/A      | B & I | K     | L |
| N/A                   | OWTS                                                   | Homeowner      | Covington | Babbie         | N/A   | N/A       | N/A      | G     | K     | L |
| N/A                   | OWTS                                                   | Homeowner      | Covington | Carolina       | N/A   | N/A       | N/A      | G     | K     | L |
| N/A                   | OWTS                                                   | Homeowner      | Covington | Heath          | N/A   | N/A       | N/A      | G     | K     | L |
| N/A                   | OWTS                                                   | Homeowner      | Covington | Horn Hill      | N/A   | N/A       | N/A      | G     | K     | L |
| N/A                   | OWTS                                                   | Homeowner      | Covington | Libertyville   | N/A   | N/A       | N/A      | G     | K     | L |
| N/A                   | OWTS                                                   | Homeowner      | Covington | Onycha         | N/A   | N/A       | N/A      | G     | K     | L |
| N/A                   | OWTS                                                   | Homeowner      | Covington | Red Level      | N/A   | N/A       | N/A      | G     | K     | L |
| N/A                   | OWTS                                                   | Homeowner      | Covington | Sanford        | N/A   | N/A       | N/A      | G     | K     | L |
| AL0031925             | Town of Lockhart and Floral Utilities Board            | Municipality   | Covington | Lockhart       | 485   | 10/1/2016 | \$ 28.00 | A     | A     | B |
| AL0055417             | Utilities Board of The City Of Andalusia               | Not For Profit | Covington | Andalusia      | 12000 | 1/1/2021  | \$ 33.40 | A     | C     | B |
| AL0021407 & AL0054313 | Utilities Board of the City of Opp                     | Municipality   | Covington | Opp            | 7785  | 1/1/2019  | \$ 35.65 | A     | A     | B |
| N/A                   | OWTS                                                   | Homeowner      | Crenshaw  | Petrey         | N/A   | N/A       | N/A      | G     | K     | L |
| AL0060534             | The Water Works and Sewer Board of the City of Luverne | Not For Profit | Crenshaw  | Luverne        | 2835  | 1/1/2019  | \$ 22.05 | A     | A     | B |
| AL0060534             | The Water Works and Sewer Board of the City of Luverne | Not For Profit | Crenshaw  | Glenwood       | 175   | 1/1/2019  | \$ 22.05 | A & B | A     | B |
| AL0022641             | Town of Brantley                                       | Municipality   | Crenshaw  | Brantley       | 950   | 2/1/2017  | \$ 16.00 | A     | A     | B |
| AL0060518             | Town of Dozier                                         | Municipality   | Crenshaw  | Dozier         | 480   | 1/1/2019  | \$ 15.00 | A     | A     | B |
| AL0062634             | Town of Rutledge                                       | Municipality   | Crenshaw  | Rutledge       | 473   | 1/1/2012  | \$ 23.50 | A     | A & C | B |
| AL0050423             | City of Cullman                                        | Municipality   | Cullman   | Cullman        | 14625 | 1/1/2018  | \$ 74.50 | A     | A     | B |
| AL0057029             | Hanceville Water Works and Sewer Board                 | Municipality   | Cullman   | Hanceville     | 3000  | 1/1/2021  | \$ 53.95 | A     | C     | B |
| AL0075523             | Integra Water Vinemont, LLC                            | Private        | Cullman   | South Vinemont | 150   | 3/14/2023 | \$ 66.81 | B & D | D     | D |
| AL0080870             | Living Water Utilities, LLC-Dodge City                 | Municipality   | Cullman   | Dodge City     | 1000  | 1/1/2019  | \$ 33.00 | A     | A     | B |
| AL0058343             | Living Water Utilities, LLC-Good Hope                  | Municipality   | Cullman   | Good Hope      | 160   | 10/8/2018 | \$ 20.86 | A     | A     | B |
| AL0050768             | Living Water Utilities, LLC-Holly Pond                 | Municipality   | Cullman   | Holly Pond     | 600   | 10/1/2015 | \$ 19.00 | A     | A     | B |
| N/A                   | OWTS                                                   | Homeowner      | Cullman   | Baileyton      | N/A   | N/A       | N/A      | G     | K     | L |
| N/A                   | OWTS                                                   | Homeowner      | Cullman   | Colony         | N/A   | N/A       | N/A      | G     | K     | L |
| N/A                   | OWTS                                                   | Homeowner      | Cullman   | Fairview       | N/A   | N/A       | N/A      | G     | K     | L |

|                       |                                                                |                 |         |               |       |           |          |       |       |   |
|-----------------------|----------------------------------------------------------------|-----------------|---------|---------------|-------|-----------|----------|-------|-------|---|
| AL0061280             | Town of Garden City                                            | Municipality    | Cullman | Garden City   | 492   | 6/1/2018  | \$ 29.50 | A     | A     | B |
| AL0051136             | Town of West Point                                             | Municipality    | Cullman | West Point    | 1500  | 10/5/2018 | \$ 37.00 | A     | A     | B |
| N/A                   | Level Plains                                                   | Municipality    | Dale    | Level Plains  | 1821  | 10/1/2017 | \$ 17.87 | A     | A     | J |
| N/A                   | Midland City                                                   | Municipality    | Dale    | Midland City  | 2264  | 10/1/2018 | \$ 60.00 | A     | A     | J |
| N/A                   | Napier Field                                                   | Municipality    | Dale    | Napier Field  | 409   | 8/1/2018  | \$ 42.00 | A     | A     | J |
| N/A                   | Newton Water and Sewer Authority                               | Not For Profit  | Dale    | Newton        | 1607  | 1/1/2019  | \$ 23.00 | A     | A     | J |
| N/A                   | OWTS                                                           | Homeowner       | Dale    | Clayhatchee   | N/A   | N/A       | N/A      | G     | K     | L |
| N/A                   | OWTS                                                           | Homeowner       | Dale    | Pinckard      | N/A   | N/A       | N/A      | G     | K     | L |
| AL0058688             | The Utilities Board of the City of Ozark                       | Not For Profit  | Dale    | Ozark         | 3500  | 11/1/2017 | \$ 25.97 | A     | A     | B |
| AL0050261 & AL0062448 | The Water Works and Sewer Board of the City of Daleville       | Not For Profit  | Dale    | Daleville     | 4200  | 10/1/2018 | \$ 16.58 | A     | A     | B |
| AL0068551             | The Water Works and Sewer Board of the Town of Ariton, Alabama | Not For Profit  | Dale    | Ariton        | 750   | 1/1/2019  | \$ 29.00 | A     | A     | B |
| AL0056677             | City of Valley Grande                                          | Municipality    | Dallas  | Valley Grande | 250   | 1/1/2021  | \$ 35.00 | A     | C     | B |
| AL0048151             | Dallas County Commission-Delwood Lagoon                        | County District | Dallas  | Orrville      | 200   | 1/1/2021  | \$ 2.00  | B     | C     | B |
| AL0043176             | Dallas County Water and Sewer Authority                        | Authority       | Dallas  | Selmont       | 5151  | 7/1/2018  | \$ 39.90 | A     | A     | B |
| AL0022578             | The Waterworks and Sewer Board of the City of Selma            | Not For Profit  | Dallas  | Selma         | 19000 | 6/1/2018  | \$ 20.99 | A     | A     | B |
| AL0056057             | City of Henagar                                                | Municipality    | DeKalb  | Henagar       | 90    | 9/18/2017 | \$ 50.69 | A     | A     | B |
| AL0042765             | City of Rainsville                                             | Municipality    | DeKalb  | Rainsville    | 1450  | 1/1/2019  | \$ 22.00 | A     | A     | B |
| AL0042765             | City of Rainsville                                             | Municipality    | DeKalb  | Fyffe         | 300   | 1/1/2019  | \$ 22.00 | A & B | A     | B |
| AL0023311             | Fort Payne Water Works Board                                   | Not For Profit  | DeKalb  | Fort Payne    | 8875  | 3/1/2018  | \$ 31.85 | A     | A     | B |
| N/A                   | OWTS                                                           | Homeowner       | DeKalb  | Lakeview      | N/A   | N/A       | N/A      | I     | K     | L |
| N/A                   | OWTS                                                           | Homeowner       | DeKalb  | Valley Head   | N/A   | N/A       | N/A      | I     | K     | L |
| N/A                   | OWTS                                                           | Homeowner       | DeKalb  | Crossville    | N/A   | N/A       | N/A      | G     | K     | L |
| N/A                   | OWTS                                                           | Homeowner       | DeKalb  | Geraldine     | N/A   | N/A       | N/A      | G     | K     | L |
| N/A                   | OWTS                                                           | Homeowner       | DeKalb  | Hammondville  | N/A   | N/A       | N/A      | G     | K     | L |
| N/A                   | OWTS                                                           | Homeowner       | DeKalb  | Ider          | N/A   | N/A       | N/A      | G     | K     | L |
| N/A                   | OWTS                                                           | Homeowner       | DeKalb  | Mentone       | N/A   | N/A       | N/A      | G     | K     | L |
| N/A                   | OWTS                                                           | Homeowner       | DeKalb  | Pine Ridge    | N/A   | N/A       | N/A      | G     | K     | L |
| N/A                   | OWTS                                                           | Homeowner       | DeKalb  | Shiloh        | N/A   | N/A       | N/A      | G     | K     | L |
| AL0042765             | Sylvania                                                       | Municipality    | DeKalb  | Sylvania      | 150   | 1/1/2011  | \$ 50.69 | A     | A     | B |
| AL0024236             | Water Works and Sewer Board of the Town of Collinsville        | Not For Profit  | DeKalb  | Collinsville  | 350   | 1/1/2019  | \$ 14.50 | A     | A     | B |
| N/A                   | Bio-Flow                                                       | For Profit      | Elmore  | Elmore        | 1335  | 1/1/2015  | \$ 50.73 | A     | A     | J |
| AL0049921             | City of Millbrook                                              | Municipality    | Elmore  | Millbrook     | 17000 | 9/10/2013 | \$ 24.00 | A     | A & C | B |
| AL0020486             | City of Tallassee                                              | Municipality    | Elmore  | Tallassee     | 5000  | 10/1/2016 | \$ 22.60 | A     | A     | B |
| N/A                   | OWTS                                                           | Homeowner       | Elmore  | Coosada       | N/A   | N/A       | N/A      | G     | K     | L |
| N/A                   | OWTS                                                           | Homeowner       | Elmore  | Deatsville    | N/A   | N/A       | N/A      | G     | K     | L |
| AL0064025             | The Water Works and Sewer Board of the City of Wetumpka        | Municipality    | Elmore  | Wetumpka      | 7220  | 10/1/2017 | \$ 39.80 | A     | A     | B |
| AL0067903             | Town of Eclectic                                               | Not For Profit  | Elmore  | Eclectic      | 1290  | 12/7/2015 | \$ 30.50 | A     | A     | B |

|                       |                                                                     |                |          |                                  |       |           |          |   |   |   |
|-----------------------|---------------------------------------------------------------------|----------------|----------|----------------------------------|-------|-----------|----------|---|---|---|
| AL0023825 & AL0073580 | City of Brewton                                                     | Municipality   | Escambia | Brewton                          | 7000  | 1/1/2021  | \$ 40.50 | A | C | B |
| N/A                   | OWTS                                                                | Homeowner      | Escambia | Pollard                          | N/A   | N/A       | N/A      | I | K | L |
| N/A                   | OWTS                                                                | Homeowner      | Escambia | Riverview                        | N/A   | N/A       | N/A      | G | K | L |
| AL0079880             | Poarch Creek Indians Utility Authority                              | Authority      | Escambia | Poarch Creek Indians Reservation | 2500  | 1/1/2019  | \$ 21.00 | A | A | B |
| AL0022608             | The Water Works Board of the Town of East Brewton                   | Not For Profit | Escambia | East Brewton                     | 2500  | 1/1/2018  | \$ 20.00 | A | A | B |
| AL0023493             | Town of Flomaton                                                    | Municipality   | Escambia | Flomaton                         | 1440  | 1/1/2019  | \$ 39.91 | A | A | B |
| AL0049557             | West Escambia Utilities, Inc.                                       | For Profit     | Escambia | Atmore                           | 8150  | 10/1/2018 | \$ 44.76 | A | A | B |
| AL0021237             | Altoona Water Works Board                                           | Not For Profit | Etowah   | Altoona                          | 550   | 1/1/2019  | \$ 32.25 | A | A | B |
| AL0057657             | City of Attalla                                                     | Municipality   | Etowah   | Attalla                          | 6950  | 4/19/2017 | \$ 18.15 | B | C | B |
| AL0021334             | Glencoe Water Works Board                                           | Not For Profit | Etowah   | Glencoe                          | 5154  | 2/1/2017  | \$ 21.28 | A | A | B |
| AL0022659             | Hokes Bluff                                                         | Municipality   | Etowah   | Hokes Bluff                      | 2900  | 10/1/2016 | \$ 36.70 | A | A | B |
| N/A                   | OWTS                                                                | Homeowner      | Etowah   | Reece City                       | N/A   | N/A       | N/A      | G | K | L |
| N/A                   | OWTS                                                                | Homeowner      | Etowah   | Ridgeville                       | N/A   | N/A       | N/A      | G | K | L |
| N/A                   | OWTS                                                                | Homeowner      | Etowah   | Walnut Grove                     | N/A   | N/A       | N/A      | G | K | L |
| AL0049603             | Sardis City Water Works and Sewer Board                             | Not For Profit | Etowah   | Sardis City                      | 1685  | 4/1/2016  | \$ 65.25 | A | A | B |
| AL0055867             | Southside Water Works and Sewer Board                               | Municipality   | Etowah   | Southside                        | 1060  | 7/1/2015  | \$ 32.38 | A | A | B |
| AL0053201 & AL0022659 | The Water Works & Sewer Board of the City of Gadsden                | Not For Profit | Etowah   | Gadsden                          | 37750 | 10/1/2018 | \$ 30.10 | A | A | B |
| AL0056839             | Utilities Board of Rainbow City                                     | Not For Profit | Etowah   | Rainbow City                     | 9000  | 3/1/2018  | \$ 32.30 | A | A | B |
| AL0054640             | City of Fayette                                                     | Municipality   | Fayette  | Fayette                          | 4550  | 3/10/2023 | \$ 29.40 | B | A | B |
| N/A                   | OWTS                                                                | Homeowner      | Fayette  | Belk                             | N/A   | N/A       | N/A      | I | K | L |
| N/A                   | OWTS                                                                | Homeowner      | Fayette  | Glen Allen                       | N/A   | N/A       | N/A      | G | K | L |
| AL0023922             | Town of Berry                                                       | Municipality   | Fayette  | Berry                            | 500   | 1/1/2019  | \$ 18.00 | A | A | B |
| N/A                   | OWTS                                                                | Homeowner      | Franklin | Hodges                           | N/A   | N/A       | N/A      | I | K | L |
| N/A                   | OWTS                                                                | Homeowner      | Franklin | Vina                             | N/A   | N/A       | N/A      | G | K | L |
| AL0027987             | Russellville Water Works and Sewer Board                            | Not For Profit | Franklin | Russellville                     | 9800  | 10/1/2018 | \$ 36.60 | A | A | B |
| AL0021245             | Sewage Disposal Board of the City of Red Bay                        | Municipality   | Franklin | Red Bay                          | 3100  | 1/1/2021  | \$ 42.22 | A | C | B |
| AL0056812             | The Water Works & Sewer Board of the Town of Phil Campbell, Alabama | Not For Profit | Franklin | Phil Campbell                    | 900   | 1/1/2019  | \$ 30.70 | A | A | B |
| AL0058947             | City of Hartford                                                    | Municipality   | Geneva   | Hartford                         | 2590  | 1/1/2019  | \$ 10.75 | A | A | B |
| AL0068896             | City of Samson                                                      | Municipality   | Geneva   | Samson                           | 1940  | 6/2/2015  | \$ 24.25 | A | A | B |
| N/A                   | OWTS                                                                | Homeowner      | Geneva   | Malvern                          | N/A   | N/A       | N/A      | G | K | L |
| AL0056111             | Slocomb Water Works and Sewer Board                                 | Not For Profit | Geneva   | Slocomb                          | 2200  | 10/2/2018 | \$ 30.62 | A | A | B |
| AL0020273             | The Water Works and Sewer Board of the City of Geneva               | Not For Profit | Geneva   | Geneva                           | 1454  | 1/1/2019  | \$ 20.55 | A | A | B |
| N/A                   | OWTS                                                                | Homeowner      | Geneva   | Black                            | N/A   | N/A       | N/A      | I | K | L |
| N/A                   | OWTS                                                                | Homeowner      | Geneva   | Coffee Springs                   | N/A   | N/A       | N/A      | G | K | L |

|                                   |                                                |                |         |                 |       |            |          |       |   |   |
|-----------------------------------|------------------------------------------------|----------------|---------|-----------------|-------|------------|----------|-------|---|---|
| AL0044067                         | City of Eutaw (Eutaw Water Works)              | Municipality   | Greene  | Boligee         | 300   | 1/1/2015   | \$ 15.95 | B     | C | B |
| AL0044067                         | City of Eutaw (Eutaw Water Works)              | Municipality   | Greene  | Eutaw           | 3175  | 1/1/2015   | \$ 15.95 | B     | C | B |
| N/A                               | OWTS                                           | Homeowner      | Greene  | Forkland        | N/A   | N/A        | N/A      | I     | K | L |
| N/A                               | OWTS                                           | Homeowner      | Greene  | Union           | N/A   | N/A        | N/A      | G     | K | L |
| AL0058122                         | City of Moundville                             | Municipality   | Hale    | Moundville      | 2450  | 1/1/2021   | \$ 34.71 | A     | C | B |
| N/A                               | OWTS                                           | Homeowner      | Hale    | Newbern         | N/A   | N/A        | N/A      | H     | K | L |
| AL0059714                         | Town of Akron                                  | Municipality   | Hale    | Akron           | 356   | 1/1/2019   | \$ 36.76 | A     | A | B |
| AL0057193                         | Utilities Board of the City of Greensboro      | Municipality   | Hale    | Greensboro      | 3300  | 2/1/2017   | \$ 9.50  | A     | A | B |
| AL0027014                         | City of Headland                               | Municipality   | Henry   | Headland        | 4973  | 1/1/2018   | \$ 17.20 | A     | A | J |
| N/A                               | Newville                                       | Municipality   | Henry   | Newville        | 549   | 10/1/2012  | \$ 22.25 | A     | A | J |
| N/A                               | OWTS                                           | Homeowner      | Henry   | Haleburg        | N/A   | N/A        | N/A      | I     | K | L |
| AL0059358                         | Water and Sewer Board of the City of Abbeville | Municipality   | Henry   | Abbeville       | 2225  | 2/1/2018   | \$ 11.53 | A     | A | B |
| AL0057878                         | City of Ashford                                | Municipality   | Houston | Ashford         | 2150  | 1/1/2019   | \$ 34.00 | A     | A | B |
| AL0072737 & AL0047465 & AL0022764 | City of Dothan                                 | Municipality   | Houston | Dothan          | 68153 | 10/1/2018  | \$ 38.88 | A     | A | B |
| AL0084000                         | City of Taylor                                 | Municipality   | Houston | Taylor          | 1310  | 10/1/2018  | \$ 38.88 | B     | A | B |
| N/A                               | Cowarts                                        | Municipality   | Houston | Cowarts         | 1953  | 7/1/2018   | \$ 48.00 | A     | A | J |
| N/A                               | Kinsey                                         | Municipality   | Houston | Kinsey          | 2243  | 1/1/2019   | \$ 54.50 | A     | A | J |
| N/A                               | OWTS                                           | Homeowner      | Houston | Madrid          | N/A   | N/A        | N/A      | I     | K | L |
| N/A                               | OWTS                                           | Homeowner      | Houston | Grimes          | N/A   | N/A        | N/A      | B & I | K | L |
| N/A                               | OWTS                                           | Homeowner      | Houston | Rehobeth        | N/A   | N/A        | N/A      | B & G | K | L |
| N/A                               | OWTS                                           | Homeowner      | Houston | Webb            | N/A   | N/A        | N/A      | B & G | K | L |
| N/A                               | OWTS                                           | Homeowner      | Houston | Avon            | N/A   | N/A        | N/A      | G     | K | L |
| AL0058335                         | Town of Columbia                               | Municipality   | Houston | Columbia        | 950   | 5/1/2017   | \$ 10.94 | A     | A | B |
| AL0024295                         | Town of Cottonwood                             | Municipality   | Houston | Cottonwood      | 1294  | 5/1/2018   | \$ 17.00 | A     | A | B |
| AL0073202                         | Town of Gordon                                 | Municipality   | Houston | Gordon          | 332   | 1/1/2014   | \$ 36.62 | A     | A | B |
| AL0062944                         | Jackson County Water Authority                 | Authority      | Jackson | Hollywood       | 1000  | 1/1/2017   | \$ 40.00 | B     | C | B |
| N/A                               | OWTS                                           | Homeowner      | Jackson | Hytow           | N/A   | N/A        | N/A      | I     | K | L |
| N/A                               | OWTS                                           | Homeowner      | Jackson | Paint Rock      | N/A   | N/A        | N/A      | I     | K | L |
| N/A                               | OWTS                                           | Homeowner      | Jackson | Pleasant Groves | N/A   | N/A        | N/A      | I     | K | L |
| N/A                               | OWTS                                           | Homeowner      | Jackson | Skyline         | N/A   | N/A        | N/A      | I     | K | L |
| N/A                               | OWTS                                           | Homeowner      | Jackson | Langston        | N/A   | N/A        | N/A      | G     | K | L |
| N/A                               | OWTS                                           | Homeowner      | Jackson | Pisgah          | N/A   | N/A        | N/A      | G     | K | L |
| AL0031372                         | Scottsboro Water Works, Sewer and Gas Board    | Not For Profit | Jackson | Scottsboro      | 15000 | 10/1/2017  | \$ 38.17 | A     | A | B |
| AL0021351                         | Stevenson Utilities Board                      | Municipality   | Jackson | Stevenson       | 2000  | 12/15/2017 | \$ 36.05 | A     | A | B |
| AL0060526                         | Town of Woodville                              | Municipality   | Jackson | Woodville       | 750   | 7/1/2018   | \$ 45.00 | B     | C | B |
| AL0020991                         | Utilities Board of the City of Bridgeport      | Municipality   | Jackson | Bridgeport      | 4000  | 10/1/2017  | \$ 28.06 | A     | A | B |
| N/A                               | Waterworks Board of Section & Dutton           | Municipality   | Jackson | Section         | 763   | 7/1/2017   | \$ 49.06 | A     | A | J |

|                       |                                                      |                 |           |                |        |           |          |       |   |   |
|-----------------------|------------------------------------------------------|-----------------|-----------|----------------|--------|-----------|----------|-------|---|---|
| N/A                   | Waterworks Board of Section & Dutton                 | Municipality    | Jackson   | Dutton         | 333    | 7/1/2017  | \$ 49.06 | A & E | A | J |
| N/A                   | Waterworks Board of Section & Dutton- City of Powell | Municipality    | Jackson   | Powell         | 100    | 7/1/2017  | \$ 49.06 | A     | A | B |
| AL0041653 & AL0025852 | City of Hoover                                       | Municipality    | Jefferson | Hoover         | 15800  | 1/1/2021  | \$ 36.72 | A     | C | B |
| AL0026913             | Jefferson County Sewer                               | County District | Jefferson | Center Point   | 650700 | 11/1/2013 | \$ 87.27 | F     | C | B |
| AL0023647             | Jefferson County Sewer                               | County District | Jefferson | Fairfield      | 650700 | 11/1/2013 | \$ 87.27 | F     | C | B |
| AL0022926             | Jefferson County Sewer                               | County District | Jefferson | Pinson         | 650700 | 11/1/2013 | \$ 87.27 | F     | C | B |
| AL0023027             | Jefferson County Sewer                               | County District | Jefferson | Mountain Brook | 650700 | 11/1/2013 | \$ 87.27 | E & F | C | B |
| AL0022934             | Jefferson County Sewer                               | County District | Jefferson | Trussville     | 650700 | 11/1/2013 | \$ 87.27 | E & F | C | B |
| AL0067067             | Jefferson County Sewer                               | County District | Jefferson | Leeds          | 650700 | 11/1/2013 | \$ 87.27 | B     | C | B |
| AL0056120             | Jefferson County Sewer                               | County District | Jefferson | Graysville     | 650700 | 11/1/2013 | \$ 87.27 | B     | C | B |
| AL0050881             | Jefferson County Sewer                               | County District | Jefferson | Warrior        | 650700 | 11/1/2013 | \$ 87.27 | B     | C | B |
| AL0023655             | Jefferson County Sewer                               | County District | Jefferson | Brighton       | 650700 | 11/1/2013 | \$ 87.27 | B     | C | B |
| AL0023027             | Jefferson County Sewer                               | County District | Jefferson | Irondale       | 650700 | 11/1/2013 | \$ 87.27 | B     | C | B |
| Multiple              | Jefferson County Sewer                               | County District | Jefferson | Brookside      | 650700 | 11/1/2013 | \$ 87.27 | F     | C | B |
| AL0026913             | Jefferson County Sewer                               | County District | Jefferson | Fultondale     | 650700 | 11/1/2013 | \$ 87.27 | F     | C | B |
| AL0026913             | Jefferson County Sewer                               | County District | Jefferson | Tarrant        | 650700 | 11/1/2013 | \$ 87.27 | F     | C | B |
| AL0023655             | Jefferson County Sewer                               | County District | Jefferson | Hueytown       | 650700 | 11/1/2013 | \$ 87.27 | F     | C | B |
| AL0023655             | Jefferson County Sewer                               | County District | Jefferson | Lipscomb       | 650700 | 11/1/2013 | \$ 87.27 | F     | C | B |
| AL0023655             | Jefferson County Sewer                               | County District | Jefferson | Midfield       | 650700 | 11/1/2013 | \$ 87.27 | F     | C | B |
| AL0022926             | Jefferson County Sewer                               | County District | Jefferson | Clay           | 650700 | 11/1/2013 | \$ 87.27 | F     | C | B |
| AL0023655             | Jefferson County Sewer                               | Municipality    | Jefferson | Bessemer       | 650700 | 11/1/2013 | \$ 87.27 | E & F | C | B |
| Multiple              | Jefferson County Sewer                               | County District | Jefferson | Homewood       | 650700 | 11/1/2013 | \$ 87.27 | E & F | C | B |
| AL0023027             | Jefferson County Sewer                               | County District | Jefferson | Vestavia Hills | 650700 | 11/1/2013 | \$ 87.27 | E & F | C | B |
| AL0026913             | Jefferson County Sewer                               | County District | Jefferson | Gardendale     | 650700 | 11/1/2013 | \$ 87.27 | B     | C | B |
| AL0023647             | Jefferson County Sewer                               | County District | Jefferson | Adamsville     | 650700 | 11/1/2013 | \$ 87.27 | B     | C | B |



|                       |                                                     |                 |            |                 |        |            |          |       |   |       |
|-----------------------|-----------------------------------------------------|-----------------|------------|-----------------|--------|------------|----------|-------|---|-------|
| Multiple              | Jefferson County Sewer                              | County District | Jefferson  | Birmingham      | 650700 | 11/1/2013  | \$ 87.27 | A     | C | B     |
| N/A                   | OWTS                                                | Homeowner       | Jefferson  | Cardiff         | N/A    | N/A        | N/A      | I     | K | L     |
| N/A                   | OWTS                                                | Homeowner       | Jefferson  | Maytown         | N/A    | N/A        | N/A      | F     | K | L     |
| N/A                   | OWTS                                                | Homeowner       | Jefferson  | North Johns     | N/A    | N/A        | N/A      | F     | K | L     |
| N/A                   | OWTS                                                | Homeowner       | Jefferson  | Trafford        | N/A    | N/A        | N/A      | F     | K | L     |
| N/A                   | OWTS                                                | Homeowner       | Jefferson  | West Jefferson  | N/A    | N/A        | N/A      | F     | K | L     |
| N/A                   | OWTS                                                | Homeowner       | Jefferson  | Kimberly        | N/A    | N/A        | N/A      | G     | K | L     |
| N/A                   | OWTS                                                | Homeowner       | Jefferson  | Morris          | N/A    | N/A        | N/A      | G     | K | L     |
| N/A                   | OWTS                                                | Homeowner       | Jefferson  | Mulga           | N/A    | N/A        | N/A      | G     | K | L     |
| N/A                   | OWTS                                                | Homeowner       | Jefferson  | Pleasant Grove  | N/A    | N/A        | N/A      | G     | K | L     |
| N/A                   | OWTS                                                | Homeowner       | Jefferson  | Sylvan Springs  | N/A    | N/A        | N/A      | G     | K | L     |
| AL0020826             | City of Sulligent                                   | Municipality    | Lamar      | Sulligent       | 1200   | 12/4/2017  | \$ 23.30 | A     | A | B     |
| N/A                   | Kennedy                                             | Municipality    | Lamar      | Kennedy         | 427    | 7/1/2018   | \$ 27.47 | A     | A | J     |
| N/A                   | OWTS                                                | Homeowner       | Lamar      | Beaverton       | N/A    | N/A        | N/A      | I     | K | L     |
| N/A                   | OWTS                                                | Homeowner       | Lamar      | Detroit         | N/A    | N/A        | N/A      | I     | K | L     |
| AL0049115             | Town of Millport                                    | Municipality    | Lamar      | Millport        | 1027   | 10/1/2014  | \$ 39.75 | A     | A | B     |
| AL0024368             | Vernon Water and Sewer Board                        | Not For Profit  | Lamar      | Vernon          | 1800   | 1/1/2019   | \$ 21.34 | A     | A | B     |
| AL0023884             | Florence Utilities                                  | Not For Profit  | Lauderdale | Florence        | 39500  | 7/1/2017   | \$ 48.20 | A     | A | B     |
| N/A                   | OWTS                                                | Homeowner       | Lauderdale | Anderson        | N/A    | N/A        | N/A      | G     | K | L     |
| N/A                   | OWTS                                                | Homeowner       | Lauderdale | Killen          | N/A    | N/A        | N/A      | G     | K | L     |
| N/A                   | OWTS                                                | Homeowner       | Lauderdale | St. Florian     | N/A    | N/A        | N/A      | G     | K | L     |
| N/A                   | OWTS                                                | Homeowner       | Lauderdale | Waterloo        | N/A    | N/A        | N/A      | G     | K | L     |
| AL0032387             | Rogersville Water Works and Sewer Board             | Not For Profit  | Lauderdale | Rogersville     | 1200   | 10/1/2017  | \$ 21.60 | A     | A | B     |
| AL0072834             | Town of Lexington                                   | Municipality    | Lauderdale | Lexington       | 900    | 1/1/2019   | \$ 59.75 | A     | A | B     |
| AL0020672             | City of Moulton                                     | Municipality    | Lawrence   | Moulton         | 3412   | 10/1/2018  | \$ 30.44 | A     | A | B     |
| N/A                   | OWTS                                                | Homeowner       | Lawrence   | Hillsboro       | N/A    | N/A        | N/A      | G     | K | L     |
| AL0066974             | Town of Town Creek                                  | Municipality    | Lawrence   | Town Creek      | 1374   | 1/1/2017   | \$ 33.00 | A     | A | B     |
| AL0048585             | West Morgan/East Lawrence Water and Sewer Authority | Authority       | Lawrence   | North Courtland | 1700   | 1/1/2019   | \$ 38.48 | A & I | A | B     |
| AL0048585             | West Morgan/East Lawrence Water and Sewer Authority | Authority       | Lawrence   | Courtland       | 1700   | 1/1/2019   | \$ 38.48 | A & B | A | B     |
| AL0050237 & AL0050245 | City of Auburn                                      | Municipality    | Lee        | Auburn          | 76143  | 10/1/2017  | \$ 29.63 | A     | A | B     |
| AL0059218 & AL0050130 | Opelika Public Works                                | Municipality    | Lee        | Opelika         | 33000  | 1/1/2021   | \$ 25.81 | E     | C | B & E |
| N/A                   | OWTS                                                | Homeowner       | Lee        | Loachapoka      | N/A    | N/A        | N/A      | G     | K | L     |
| N/A                   | Smiths Water and Sewer Authority                    | Authority       | Lee        | Smiths Station  | 5381   | 12/11/2018 | \$ 40.71 | A     | A | J     |
| AL0020206             | Athens Utilities                                    | Not For Profit  | Limestone  | Athens          | 27534  | 1/1/2019   | \$ 43.56 | A     | A | B & A |
| AL0056545 & AL0075248 | Limestone County Water and Sewer Authority          | Authority       | Limestone  | Elkmont         | 1766   | 10/1/2016  | \$ 47.92 | A & B | A | B     |
| N/A                   | OWTS                                                | Homeowner       | Limestone  | Lester          | N/A    | N/A        | N/A      | I     | K | L     |
| N/A                   | OWTS                                                | Homeowner       | Limestone  | Mooreville      | N/A    | N/A        | N/A      | G     | K | L     |
| AL0023329             | Water Works and Sewer Board of the Town of Ardmore  | Municipality    | Limestone  | Ardmore         | 2949   | 8/1/2017   | \$ 34.90 | A     | A | B     |

|           |                                                             |                |         |                   |        |           |          |       |   |       |
|-----------|-------------------------------------------------------------|----------------|---------|-------------------|--------|-----------|----------|-------|---|-------|
| AL0024155 | Fort Deposit Water Works and Sewer Board                    | Not For Profit | Lowndes | Fort Deposit      | 1300   | 8/1/2017  | \$ 49.85 | A     | A | B     |
| AL0055883 | Mosses Water, Sewer, and Fire Protection Authority          | Authority      | Lowndes | Mosses            | 150    | 1/1/2019  | \$ 18.75 | A     | A | B     |
| N/A       | OWTS                                                        | Homeowner      | Lowndes | Benton            | N/A    | N/A       | N/A      | I     | K | L     |
| N/A       | OWTS                                                        | Homeowner      | Lowndes | Lowndesboro       | N/A    | N/A       | N/A      | I     | K | L     |
| N/A       | OWTS                                                        | Homeowner      | Lowndes | White Hall        | N/A    | N/A       | N/A      | I     | K | L     |
| N/A       | OWTS                                                        | Homeowner      | Lowndes | Gordonville       | N/A    | N/A       | N/A      | G     | K | L     |
| AL0050113 | Town of Hayneville                                          | Municipality   | Lowndes | Hayneville        | 700    | 7/1/2017  | \$ 10.50 | A     | A | B     |
| N/A       | OWTS                                                        | Homeowner      | Macon   | Franklin          | N/A    | N/A       | N/A      | I     | K | L     |
| AL0070939 | Town of Notasulga                                           | Municipality   | Macon   | Notasulga         | 475    | 1/1/2019  | \$ 31.00 | A     | A | B & E |
| AL0076317 | Town of Shorter                                             | Municipality   | Macon   | Shorter           | 300    | 1/1/2021  | \$ 32.00 | B     | C | B & E |
| AL0048763 | Utilities Board of the City of Tuskegee                     | Municipality   | Macon   | Tuskegee          | 11350  | 5/25/2022 | \$ 54.87 | E     | C | B & E |
| Multiple  | City of Huntsville                                          | Municipality   | Madison | Huntsville        | 312835 | 10/1/2016 | \$ 28.98 | A     | A | B     |
| AL0023761 | City of New Hope                                            | Municipality   | Madison | New Hope          | 2901   | 10/1/2018 | \$ 40.36 | A     | A | B     |
| Multiple  | Harvest-Monrovia Water, Sewer and Fire Protection Authority | Authority      | Madison | Harvest           | 12721  | 1/1/2018  | \$ 48.26 | A     | A | B     |
| AL0078298 | Integra Water Madison County, LLC                           | Private        | Madison | Meridianville     | 3000   | 3/14/2023 | \$ 54.50 | B & D | D | D     |
| AL0078298 | Integra Water Madison County, LLC                           | Private        | Madison | New Market        | 7650   | 3/14/2023 | \$ 54.50 | B & D | D | D     |
| AL0070661 | Town of Gurley                                              | Municipality   | Madison | Gurley            | 801    | 1/1/2021  | \$ 40.45 | B     | C | B     |
| AL0053228 | Town of Owens Cross Roads                                   | Authority      | Madison | Owens Cross Roads | 1525   | 3/8/2023  | \$ 44.00 | E     | E | B     |
| N/A       | Triana                                                      | Municipality   | Madison | Triana            | 3396   | 1/1/2019  | \$ 29.40 | A     | A | J     |
| AL0071897 | Water and Wastewater Board of the City of Madison           | Not For Profit | Madison | Madison           | 43861  | 10/1/2018 | \$ 37.08 | A     | A | B     |
| N/A       | OWTS                                                        | Homeowner      | Marengo | Dayton            | N/A    | N/A       | N/A      | I     | K | L     |
| N/A       | OWTS                                                        | Homeowner      | Marengo | Faunsdale         | N/A    | N/A       | N/A      | I     | K | L     |
| N/A       | OWTS                                                        | Homeowner      | Marengo | Myrtlewood        | N/A    | N/A       | N/A      | I     | K | L     |
| N/A       | OWTS                                                        | Homeowner      | Marengo | Sweet Water       | N/A    | N/A       | N/A      | I     | K | L     |
| N/A       | OWTS                                                        | Homeowner      | Marengo | Thomaston         | N/A    | N/A       | N/A      | I     | K | L     |
| N/A       | OWTS                                                        | Homeowner      | Marengo | Providence        | N/A    | N/A       | N/A      | G     | K | L     |
| AL0043168 | The Water Works and Sewer Board of the City of Demopolis    | Municipality   | Marengo | Demopolis         | 7700   | 1/1/2019  | \$ 27.96 | A     | A | B     |
| AL0045683 | Utilities Board of The City of Linden                       | Municipality   | Marengo | Linden            | 2424   | 6/1/2018  | \$ 24.79 | A     | A | B     |
| AL0048372 | City of Hamilton                                            | Municipality   | Marion  | Hamilton          | 3000   | 2/1/2017  | \$ 18.79 | A     | A | B     |
| AL0082155 | Hackleburg Water and Sewer Board                            | Municipality   | Marion  | Hackleburg        | 650    | 1/1/2019  | \$ 20.00 | A     | A | B     |
| N/A       | OWTS                                                        | Homeowner      | Marion  | Bear Creek        | N/A    | N/A       | N/A      | G     | K | L     |
| N/A       | OWTS                                                        | Homeowner      | Marion  | Gu-Win            | N/A    | N/A       | N/A      | G     | K | L     |
| N/A       | OWTS                                                        | Homeowner      | Marion  | Twin              | N/A    | N/A       | N/A      | G     | K | L     |
| AL0057169 | Town of Brilliant                                           | Municipality   | Marion  | Brilliant         | 200    | 1/1/2019  | \$ 17.75 | A     | A | B     |
| AL0052272 | Waterworks & Sewer Board of Guin                            | Municipality   | Marion  | Guin              | 1500   | 1/1/2018  | \$ 16.28 | A     | A | B     |

|                                   |                                                                          |                |            |                |        |           |          |       |   |   |
|-----------------------------------|--------------------------------------------------------------------------|----------------|------------|----------------|--------|-----------|----------|-------|---|---|
| AL0023400                         | Winfield Water Works & Sewer Board                                       | Municipality   | Marion     | Winfield       | 2500   | 1/1/2021  | \$ 42.64 | A     | C | B |
| AL0020303                         | Arab Sewer Board                                                         | Not For Profit | Marshall   | Arab           | 3500   | 5/1/2018  | \$ 61.78 | A     | A | B |
| AL0020150                         | Guntersville Water and Sewer Board                                       | Not For Profit | Marshall   | Guntersville   | 10000  | 1/1/2019  | \$ 28.82 | A     | A | B |
| AL0020192                         | Municipal Utilities Board of the City of Albertville                     | Municipality   | Marshall   | Albertville    | 22000  | 7/1/2022  | \$ 35.00 | E     | E | B |
| N/A                               | OWTS                                                                     | Homeowner      | Marshall   | Douglas        | N/A    | N/A       | N/A      | I     | K | L |
| N/A                               | OWTS                                                                     | Homeowner      | Marshall   | Grant          | N/A    | N/A       | N/A      | G     | K | L |
| N/A                               | OWTS                                                                     | Homeowner      | Marshall   | Union Grove    | N/A    | N/A       | N/A      | G     | K | L |
| AL0049603                         | The Board of Water and Sewer Commissioners for the City of Boaz, Alabama | Not For Profit | Marshall   | Boaz           | 9710   | 2/1/2018  | \$ 41.00 | A     | A | B |
| AL0055786                         | Board of Water & Sewer Commissioners of the City of Saraland             | Not For Profit | Mobile     | Saraland       | 13700  | 10/1/2018 | \$ 32.54 | A     | A | B |
| AL0050547                         | Dauphin Island Water and Sewer Authority                                 | Authority      | Mobile     | Dauphin Island | 5100   | 1/1/2019  | \$ 41.40 | A     | A | B |
| AL0077453                         | Integra Water Creola, LLC                                                | Private        | Mobile     | Creola         | 126    | 3/14/2023 | \$ 54.44 | B & D | D | D |
| AL0023086 & AL0023094             | Mobile Area Water & Sewer System                                         | Municipality   | Mobile     | Mobile         | 265440 | 1/1/2023  | \$ 62.47 | E     | E | B |
| N/A                               | Mobile County Water, Sewer, and Fire Protection Authority                | Authority      | Mobile     | Mobile County  | 39573  | 4/1/2018  | \$ 48.00 | A     | A | A |
| N/A                               | OWTS                                                                     | Homeowner      | Mobile     | Mount Vernon   | N/A    | N/A       | N/A      | G     | K | L |
| AL0063002                         | Satsuma Water and Sewer Board                                            | Not For Profit | Mobile     | Satsuma        | 6500   | 10/1/2017 | \$ 36.21 | A     | A | B |
| AL0060887                         | South Alabama Utilities-Citronelle                                       | Not For Profit | Mobile     | Citronelle     | 4170   | 9/1/2018  | \$ 35.80 | A     | A | B |
| AL0083895 & AL0081655 & AL0081299 | South Alabama Utilities-Semmes                                           | Not For Profit | Mobile     | Semmes         | 4941   | 9/1/2018  | \$ 43.68 | A     | A | J |
| AL0078921                         | Utilities Board of the City of Bayou La Batre                            | Not For Profit | Mobile     | Bayou La Batre | 2300   | 10/1/2015 | \$ 28.05 | A     | A | B |
| AL0020885                         | Utilities Board of the City of Chickasaw                                 | Municipality   | Mobile     | Chickasaw      | 5979   | 1/1/2021  | \$ 50.00 | B     | C | B |
| AL0055204                         | Water Works and Sewer Board of the City of Prichard                      | Municipality   | Mobile     | Prichard       | 5000   | 3/2/2015  | \$ 47.33 | A     | A | B |
| AL0027782                         | Excel                                                                    | Municipality   | Monroe     | Excel          | 230    | 4/1/2018  | \$ 41.17 | A     | A | B |
| N/A                               | OWTS                                                                     | Homeowner      | Monroe     | Vredenburgh    | N/A    | N/A       | N/A      | I     | K | L |
| N/A                               | OWTS                                                                     | Homeowner      | Monroe     | Beatrice       | N/A    | N/A       | N/A      | B & I | K | L |
| AL0027782 & AL0022136             | The Water Works and Sewer Board of the City of Monroeville               | Municipality   | Monroe     | Monroeville    | 6690   | 1/16/2018 | \$ 29.45 | A     | A | B |
| AL0027782                         | The Water Works and Sewer Board of the City of Monroeville               | Municipality   | Monroe     | Frisco City    | 615    | 1/16/2018 | \$ 29.45 | A & B | A | B |
| Multiple                          | The Water Works & Sanitary Sewer Board of the City of Montgomery         | Not For Profit | Montgomery | Montgomery     | 200200 | 1/1/2018  | \$ 31.12 | A     | A | B |

|                       |                                                                  |                |            |              |       |            |          |       |       |   |
|-----------------------|------------------------------------------------------------------|----------------|------------|--------------|-------|------------|----------|-------|-------|---|
| AL0082431             | The Water Works & Sanitary Sewer Board of the City of Montgomery | Not For Profit | Montgomery | Pike Road    | 4500  | 1/1/2018   | \$ 31.12 | B     | A     | B |
| AL0048593             | Decatur Utilities                                                | Not For Profit | Morgan     | Decatur      | 59000 | 5/1/2018   | \$ 27.56 | A     | A     | B |
| AL0054674             | Hartselle Utilities                                              | Municipality   | Morgan     | Hartselle    | 10000 | 7/1/2018   | \$ 56.16 | A     | A     | B |
| AL0060577             | Northeast Morgan County Water and Sewer Authority                | Authority      | Morgan     | Somerville   | 700   | 10/2/2018  | \$ 30.00 | A     | A     | B |
| AL0021113             | Town of Falkville                                                | Municipality   | Morgan     | Falkville    | 1250  | 10/3/2017  | \$ 25.29 | A     | A     | B |
| AL0060577             | Town of Priceville                                               | Municipality   | Morgan     | Priceville   | 3500  | 1/1/2018   | \$ 23.21 | A     | A     | B |
| AL0076708             | West Morgan/East Lawrence Water and Sewer Authority              | Authority      | Morgan     | Trinity      | 1000  | 1/1/2019   | \$ 38.48 | A & B | A     | B |
| N/A                   | OWTS                                                             | Homeowner      | Morgan     | Eva          | N/A   | N/A        | N/A      | G     | K     | L |
| AL0023809             | City of Marion                                                   | Municipality   | Perry      | Marion       | 1375  | 1/1/2019   | \$ 20.00 | A     | A     | B |
| AL0063657             | The Waterworks and Sewer Board of the City of Uniontown          | Municipality   | Perry      | Uniontown    | 2107  | 10/15/2017 | \$ 28.10 | A     | A     | J |
| AL0020915             | City of Reform                                                   | Municipality   | Pickens    | Reform       | 1660  | 10/1/2017  | \$ 12.97 | A     | A     | B |
| AL0061981             | Gordo Water, Gas and Sewer Board                                 | Municipality   | Pickens    | Gordo        | 1785  | 1/1/2018   | \$ 27.82 | A     | A     | B |
| N/A                   | OWTS                                                             | Homeowner      | Pickens    | Ethelsville  | N/A   | N/A        | N/A      | I     | K     | L |
| N/A                   | OWTS                                                             | Homeowner      | Pickens    | McMullen     | N/A   | N/A        | N/A      | I     | K     | L |
| N/A                   | OWTS                                                             | Homeowner      | Pickens    | Memphis      | N/A   | N/A        | N/A      | I     | K     | L |
| N/A                   | OWTS                                                             | Homeowner      | Pickens    | Pickensville | N/A   | N/A        | N/A      | G     | K     | L |
| AL0020907             | Town of Carrollton                                               | Municipality   | Pickens    | Carrollton   | 350   | 9/6/2012   | \$ 22.00 | A     | A & C | B |
| AL0020770 & AL0056332 | Water and Sewer Board of the City of Aliceville                  | Municipality   | Pickens    | Aliceville   | 2800  | 1/1/2019   | \$ 25.47 | A     | A     | B |
| AL0044105             | City of Brundidge                                                | Municipality   | Pike       | Brundidge    | 3000  | 1/1/2018   | \$ 34.24 | A     | A     | B |
| AL0032310             | City of Troy                                                     | Municipality   | Pike       | Troy         | 19191 | 1/1/2019   | \$ 22.00 | A     | A     | B |
| N/A                   | OWTS                                                             | Homeowner      | Pike       | Banks        | N/A   | N/A        | N/A      | I     | K     | L |
| N/A                   | OWTS                                                             | Homeowner      | Pike       | Goshen       | N/A   | N/A        | N/A      | I     | K     | L |
| N/A                   | OWTS                                                             | Homeowner      | Randolph   | Woodland     | N/A   | N/A        | N/A      | G     | K     | L |
| AL0062715             | Roanoke Utilities Board                                          | Not For Profit | Randolph   | Roanoke      | 6500  | 1/1/2019   | \$ 44.12 | A     | A     | B |
| AL0062847             | Town of Wadley                                                   | Municipality   | Randolph   | Wadley       | 650   | 1/1/2019   | \$ 15.95 | A     | A     | B |
| AL0024171             | Water, Sewer, & Gas Board of the Town of Wedowee                 | Municipality   | Randolph   | Wedowee      | 800   | 3/10/2023  | \$ 23.19 | B     | D     | B |
| AL0022209             | Phenix City Department of Public Utilities                       | Municipality   | Russell    | Phenix City  | 36000 | 4/1/2019   | \$ 25.50 | A     | A     | B |
| AL0020699             | The Water and Sewer Board of the Town of Hurtsboro               | Municipality   | Russell    | Hurtsboro    | 335   | 5/1/2018   | \$ 32.36 | A     | A     | B |
| AL0025828             | City of Alabaster                                                | Municipality   | Shelby     | Alabaster    | 31000 | 1/1/2018   | \$ 47.33 | E     | E     | B |
| AL0050938 & AL0074608 | City of Calera                                                   | Municipality   | Shelby     | Calera       | 9103  | 1/1/2019   | \$ 45.40 | A     | A     | B |
| AL0024589             | City of Columbiana                                               | Municipality   | Shelby     | Columbiana   | 5000  | 5/1/2018   | \$ 40.52 | A     | A     | B |
| AL0023116             | City of Helena Utilities Board                                   | Municipality   | Shelby     | Helena       | 14610 | 10/1/2015  | \$ 32.50 | A     | A     | B |
| AL0054666             | City of Pelham                                                   | Municipality   | Shelby     | Pelham       | 12000 | 3/1/2018   | \$ 42.30 | A     | A     | B |
| AL0067814 & AL0073351 | Enviro-Systems, LLC                                              | Private        | Shelby     | Vincent      | 390   | 3/14/2023  | \$ 64.91 | B & D | D     | D |
| AL0067814 & AL0073351 | Enviro-Systems, LLC                                              | Private        | Shelby     | Harpersville | 390   | 3/14/2023  | \$ 64.91 | B & D | D     | D |

|                                   |                                                                   |                |           |                        |       |            |          |       |       |   |
|-----------------------------------|-------------------------------------------------------------------|----------------|-----------|------------------------|-------|------------|----------|-------|-------|---|
| AL0067814 & AL0073351             | Enviro-Systems, LLC                                               | Private        | Shelby    | Westover               | 390   | 3/14/2023  | \$ 64.91 | B & D | D     | D |
| AL0023299                         | Montevallo Water and Sewer Board                                  | Municipality   | Shelby    | Montevallo             | 8000  | 10/31/2015 | \$ 46.37 | A     | A     | B |
| N/A                               | OWTS                                                              | Homeowner      | Shelby    | Indian Springs Village | N/A   | N/A        | N/A      | G     | K     | L |
| N/A                               | OWTS                                                              | Homeowner      | Shelby    | Wilton                 | N/A   | N/A        | N/A      | G     | K     | L |
| N/A                               | OWTS                                                              | Homeowner      | Shelby    | Highland Lakes         | N/A   | N/A        | N/A      | G     | K     | L |
| Multiple                          | Southwest Water Company-Shelby Ridge Utility Systems, LLC         | Private        | Shelby    | Chelsea                | 15653 | 3/21/2023  | \$ 86.77 | E     | D     | B |
| AL0021491                         | Wilsonville Waterworks Board                                      | Not For Profit | Shelby    | Wilsonville            | 1000  | 10/1/2018  | \$ 31.50 | A     | A     | B |
| AL0023302                         | City of Ashville                                                  | Municipality   | St. Clair | Ashville               | 999   | 2/1/2016   | \$ 23.36 | A     | A     | B |
| AL0045993                         | City of Pell City                                                 | Municipality   | St. Clair | Pell City              | 16000 | 6/11/2018  | \$ 43.90 | A     | A     | B |
| AL0050903                         | City of Springville                                               | Municipality   | St. Clair | Springville            | 2091  | 10/1/2021  | \$ 54.63 | B     | C     | D |
| AL0055255                         | Moody Governmental Utility Services Corporation                   | Municipality   | St. Clair | Moody                  | 12500 | 1/1/2015   | \$ 78.90 | A     | A     | B |
| AL0070084 & AL0043494             | Odenville Utilities Board                                         | Not For Profit | St. Clair | Odenville              | 3795  | 11/1/2018  | \$ 26.00 | A     | A     | B |
| N/A                               | OWTS                                                              | Homeowner      | St. Clair | Argo                   | N/A   | N/A        | N/A      | G     | K     | L |
| N/A                               | OWTS                                                              | Homeowner      | St. Clair | Margaret               | N/A   | N/A        | N/A      | G     | K     | L |
| N/A                               | OWTS                                                              | Homeowner      | St. Clair | Ragland                | N/A   | N/A        | N/A      | G     | K     | L |
| N/A                               | OWTS                                                              | Homeowner      | St. Clair | Riverside              | N/A   | N/A        | N/A      | G     | K     | L |
| AL0072729                         | Town of Steele                                                    | Municipality   | St. Clair | Steele                 | 400   | 1/1/2021   | \$ 19.00 | B     | C     | B |
| AL0023361                         | City of York                                                      | Municipality   | Sumter    | York                   | 1250  | 9/1/2016   | \$ 27.70 | A     | A     | B |
| AL0023256                         | Livingston Utilities Board                                        | Not For Profit | Sumter    | Livingston             | 1650  | 10/1/2018  | \$ 18.68 | A     | A     | B |
| AL0023256                         | Livingston Utilities Board- Epes                                  | Not For Profit | Sumter    | Epes                   | 1650  | 10/1/2018  | \$ 12.03 | A     | A     | B |
| AL0071056                         | Sumter County Sewer Authority                                     | Authority      | Sumter    | Bellamy                | 380   | 3/10/2023  | \$ 9.00  | B     | C     | B |
| AL0080306                         | Sumter County Sewer Authority                                     | Authority      | Sumter    | Emelle                 | 80    | 3/10/2023  | \$ 33.00 | B     | D     | B |
| AL0080306                         | Sumter County Sewer Authority                                     | Authority      | Sumter    | Geiger                 | 160   | 3/10/2023  | \$ 33.00 | B     | D     | B |
| AL0080306                         | Sumter County Sewer Authority                                     | Authority      | Sumter    | Gainesville            | 220   | 3/10/2023  | \$ 33.00 | B     | D     | B |
| AL0064386                         | Town of Cuba                                                      | Municipality   | Sumter    | Cuba                   | 600   | 8/1/2011   | \$ 24.00 | A     | A & C | B |
| AL0054356                         | City of Lincoln                                                   | Municipality   | Talladega | Lincoln                | 1000  | 11/1/2018  | \$ 34.97 | A     | A     | B |
| AL0022349 & AL0022357 & AL0054658 | City of Talladega                                                 | Municipality   | Talladega | Talladega              | 8000  | 10/1/2016  | \$ 33.32 | A     | A     | B |
| N/A                               | OWTS                                                              | Homeowner      | Talladega | Bon Air                | N/A   | N/A        | N/A      | I     | K     | L |
| N/A                               | OWTS                                                              | Homeowner      | Talladega | Talladega Springs      | N/A   | N/A        | N/A      | I     | K     | L |
| N/A                               | OWTS                                                              | Homeowner      | Talladega | Munford                | N/A   | N/A        | N/A      | G     | K     | L |
| N/A                               | OWTS                                                              | Homeowner      | Talladega | Waldo                  | N/A   | N/A        | N/A      | G     | K     | L |
| AL0021466                         | The Water Works, Sewer, and Gas Board of the City of Childersburg | Not For Profit | Talladega | Childersburg           | 3000  | 5/1/2017   | \$ 42.50 | A     | A     | B |
| AL0020001                         | Utilities Board of the City of Sylacauga                          | Municipality   | Talladega | Oak Grove              | 245   | 1/1/2018   | \$ 37.55 | B     | A     | B |
| AL0020001                         | Utilities Board of the City of Sylacauga                          | Municipality   | Talladega | Sylacauga              | 15355 | 1/1/2018   | \$ 37.55 | A     | A     | B |

|                       |                                                        |                |            |                |        |           |          |       |   |   |
|-----------------------|--------------------------------------------------------|----------------|------------|----------------|--------|-----------|----------|-------|---|---|
| AL0048861 & AL0021156 | City of Alexander City                                 | Municipality   | Tallapoosa | Alexander City | 16000  | 1/1/2019  | \$ 48.04 | A     | A | B |
| AL0063797             | Dadeville Water Works and Sewer Board                  | Municipality   | Tallapoosa | Dadeville      | 3048   | 6/1/2017  | \$ 63.00 | A     | A | B |
| N/A                   | OWTS                                                   | Homeowner      | Tallapoosa | Daviston       | N/A    | N/A       | N/A      | G     | K | L |
| N/A                   | OWTS                                                   | Homeowner      | Tallapoosa | Goldville      | N/A    | N/A       | N/A      | G     | K | L |
| N/A                   | OWTS                                                   | Homeowner      | Tallapoosa | Jacksons' Gap  | N/A    | N/A       | N/A      | G     | K | L |
| N/A                   | OWTS                                                   | Homeowner      | Tallapoosa | New Site       | N/A    | N/A       | N/A      | G     | K | L |
| AL0024210             | Town of Camp Hill                                      | Municipality   | Tallapoosa | Camp Hill      | 500    | 3/10/2023 | \$ 36.00 | B     | D | B |
| AL0064394             | City of Northport                                      | Municipality   | Tuscaloosa | Northport      | 20500  | 10/1/2018 | \$ 37.10 | A     | A | B |
| AL0022713             | City of Tuscaloosa                                     | Municipality   | Tuscaloosa | Tuscaloosa     | 101113 | 10/1/2018 | \$ 31.94 | A     | A | B |
| N/A                   | OWTS                                                   | Homeowner      | Tuscaloosa | Brookwood      | N/A    | N/A       | N/A      | G     | K | L |
| N/A                   | OWTS                                                   | Homeowner      | Tuscaloosa | Coaling        | N/A    | N/A       | N/A      | G     | K | L |
| N/A                   | OWTS                                                   | Homeowner      | Tuscaloosa | Coker          | N/A    | N/A       | N/A      | G     | K | L |
| N/A                   | OWTS                                                   | Homeowner      | Tuscaloosa | Lake View      | N/A    | N/A       | N/A      | G     | K | L |
| AL0070254             | Town of Vance                                          | Municipality   | Tuscaloosa | Vance          | 875    | 1/1/2019  | \$ 25.60 | A     | A | B |
| AL0024341             | Carbon Hill Utilities Board                            | Not For Profit | Walker     | Carbon Hill    | 670    | 4/25/2018 | \$ 30.10 | A     | A | B |
| AL0020427             | Cordova Water Works and Gas Board                      | Not For Profit | Walker     | Cordova        | 1500   | 1/25/2018 | \$ 39.97 | A     | A | B |
| AL0055409             | East Walker Sewer Authority                            | Authority      | Walker     | Dora           | 588    | 1/1/2017  | \$ 39.50 | B     | C | B |
| AL0023418             | Jasper Waterworks and Sewer Board                      | Not For Profit | Walker     | Jasper         | 14400  | 1/1/2017  | \$ 46.60 | A     | A | B |
| N/A                   | OWTS                                                   | Homeowner      | Walker     | Eldridge       | N/A    | N/A       | N/A      | G     | K | L |
| N/A                   | OWTS                                                   | Homeowner      | Walker     | Kansas         | N/A    | N/A       | N/A      | G     | K | L |
| N/A                   | OWTS                                                   | Homeowner      | Walker     | Nauvoo         | N/A    | N/A       | N/A      | G     | K | L |
| N/A                   | OWTS                                                   | Homeowner      | Walker     | Sipsey         | N/A    | N/A       | N/A      | G     | K | L |
| AL0076244             | Sumiton Water Works Board                              | Not For Profit | Walker     | Sumiton        | 1028   | 1/1/2021  | \$ 40.75 | A     | C | B |
| AL0061158             | The Water Works and Sewer Board of the Town of Parrish | Not For Profit | Walker     | Parrish        | 900    | 9/1/2017  | \$ 40.05 | A     | A | B |
| AL0025348             | Town of Oakman                                         | Not For Profit | Walker     | Oakman         | 728    | 1/1/2018  | \$ 32.70 | A     | A | B |
| N/A                   | OWTS                                                   | Homeowner      | Washington | McIntosh       | N/A    | N/A       | N/A      | B & G | K | L |
| N/A                   | OWTS                                                   | Homeowner      | Washington | Hobson         | N/A    | N/A       | N/A      | G     | K | L |
| AL0060453             | The Utilities Board of the Town of Chatom              | Not For Profit | Washington | Chatom         | 600    | 1/1/2019  | \$ 28.00 | A     | A | B |
| AL0051144             | Town of Millry                                         | Municipality   | Washington | Millry         | 750    | 3/10/2023 | \$ 20.00 | B     | D | B |
| AL0023680 & AL0023701 | City of Camden                                         | Municipality   | Wilcox     | Camden         | 4500   | 8/22/2017 | \$ 34.72 | A     | A | B |
| N/A                   | OWTS                                                   | Homeowner      | Wilcox     | Oak Hill       | N/A    | N/A       | N/A      | I     | K | L |
| N/A                   | OWTS                                                   | Homeowner      | Wilcox     | Pine Apple     | N/A    | N/A       | N/A      | I     | K | L |
| N/A                   | OWTS                                                   | Homeowner      | Wilcox     | Yellow Bluff   | N/A    | N/A       | N/A      | H     | K | L |
| AL0062731             | Town of Pine Hill                                      | Municipality   | Wilcox     | Pine Hill      | 660    | 11/1/2019 | \$ 37.35 | A     | A | B |
| AL0065480             | Double Springs Water and Sewer Board                   | Municipality   | Winston    | Double Springs | 1200   | 1/1/2019  | \$ 45.02 | A     | A | B |
| AL0059455             | Haleyville Waterworks & Sewer Board                    | Municipality   | Winston    | Haleyville     | 4200   | 2/1/2018  | \$ 29.07 | A     | A | B |
| N/A                   | OWTS                                                   | Homeowner      | Winston    | Lynn           | N/A    | N/A       | N/A      | I     | K | L |
| N/A                   | OWTS                                                   | Homeowner      | Winston    | Natural Bridge | N/A    | N/A       | N/A      | I     | K | L |
| N/A                   | OWTS                                                   | Homeowner      | Winston    | Arley          | N/A    | N/A       | N/A      | G     | K | L |

|           |                 |              |         |         |     |          |    |       |   |   |   |
|-----------|-----------------|--------------|---------|---------|-----|----------|----|-------|---|---|---|
| AL0075621 | Town of Addison | Municipality | Winston | Addison | 850 | 1/1/2018 | \$ | 42.80 | A | A | B |
|-----------|-----------------|--------------|---------|---------|-----|----------|----|-------|---|---|---|

Data sources: (A) UNC Dashboard, (B) NPDES Permit(s), (C) MWPP, (D) Utility Representative, (E) Utility Website, (F) Jefferson County Sewer Coverage Map, (G) Real Estate Listings, (H) Personal Experience, (I) Assumed, (J) Municipality Population Estimate, (K) Estimated Monthly Loan Payments for OWTS, (L) Census Tract Population not on Sewer

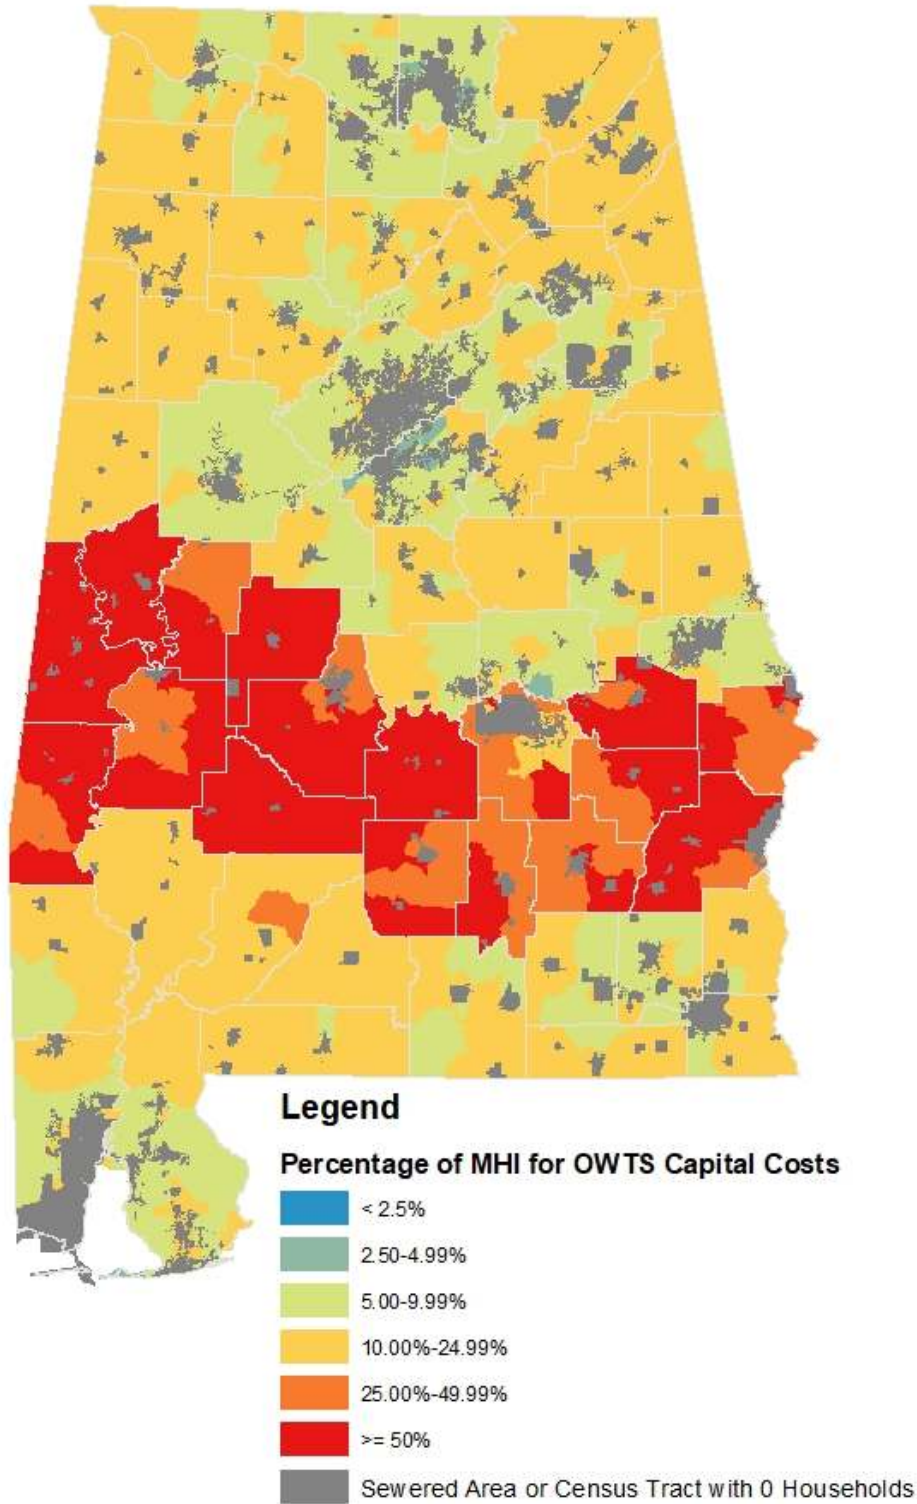

**Fig. S2: OWTS Capital Costs as a Percentage of Median Household Income (MHI) in Alabama**



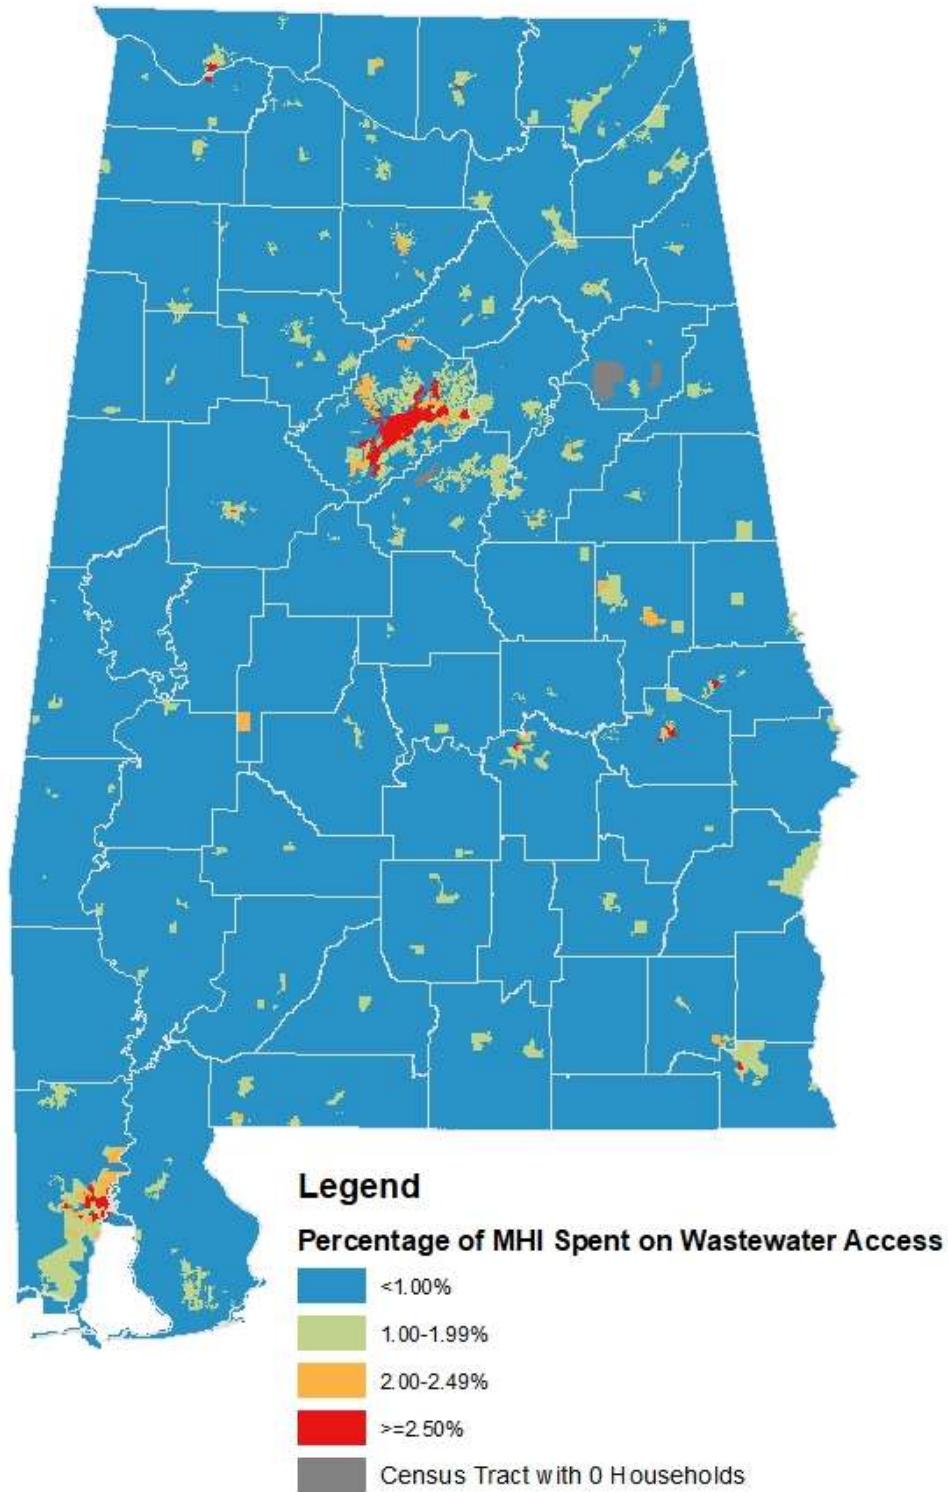

**Fig. S3: Wastewater Expenses as a Percentage of Median Household Income (MHI) in Alabama with OWTS Expenses Represented as Annualized Pumping Costs**

**Table S3: Census Tracts with Unaffordable Wastewater Expenses based on Median Household Income (MHI) when Onsite Wastewater Treatment System (OWTS) is Represented as Monthly Loan Payment and Pumping Costs**

| <b>Census Tract</b> | <b>County</b> | <b>Wastewater Treatment Provider</b> | <b>% of Census Tract MHI Spent on Wastewater Access</b> | <b>Estimated Number of Households in Affected Area</b> |
|---------------------|---------------|--------------------------------------|---------------------------------------------------------|--------------------------------------------------------|
| Census Tract 9501   | Barbour       | OWTS                                 | 4.66                                                    | 1167                                                   |
| Census Tract 9502   | Barbour       | OWTS                                 | 5.48                                                    | 1049                                                   |
| Census Tract 9503   | Barbour       | OWTS                                 | 6.24                                                    | 617                                                    |
| Census Tract 9504   | Barbour       | OWTS                                 | 6.71                                                    | 1133                                                   |
| Census Tract 9505   | Barbour       | OWTS                                 | 4.01                                                    | 1376                                                   |
| Census Tract 9506   | Barbour       | OWTS                                 | 6.55                                                    | 726                                                    |
| Census Tract 9507   | Barbour       | OWTS                                 | 8.42                                                    | 587                                                    |
| Census Tract 9508   | Barbour       | OWTS                                 | 4.96                                                    | 1090                                                   |
| Census Tract 9509   | Barbour       | OWTS                                 | 7.15                                                    | 1600                                                   |
| Census Tract 9521   | Bullock       | OWTS                                 | 7.18                                                    | 604                                                    |
| Census Tract 9522   | Bullock       | OWTS                                 | 5.76                                                    | 1899                                                   |
| Census Tract 9525   | Bullock       | OWTS                                 | 3.36                                                    | 1018                                                   |
| Census Tract 9527   | Butler        | OWTS                                 | 3.90                                                    | 730                                                    |
| Census Tract 9529   | Butler        | OWTS                                 | 4.42                                                    | 671                                                    |
| Census Tract 9530   | Butler        | OWTS                                 | 4.59                                                    | 549                                                    |
| Census Tract 9531   | Butler        | OWTS                                 | 6.02                                                    | 855                                                    |
| Census Tract 9532   | Butler        | OWTS                                 | 4.09                                                    | 1227                                                   |
| Census Tract 9533   | Butler        | OWTS                                 | 3.53                                                    | 652                                                    |
| Census Tract 9534   | Butler        | OWTS                                 | 5.74                                                    | 828                                                    |
| Census Tract 9535   | Butler        | OWTS                                 | 4.72                                                    | 514                                                    |
| Census Tract 3      | Calhoun       | OWTS                                 | 2.50                                                    | 1253                                                   |
| Census Tract 5      | Calhoun       | OWTS                                 | 2.89                                                    | 495                                                    |
| Census Tract 6      | Calhoun       | OWTS                                 | 2.94                                                    | 705                                                    |
| Census Tract 9567   | Choctaw       | OWTS                                 | 5.59                                                    | 1344                                                   |
| Census Tract 9568   | Choctaw       | OWTS                                 | 5.41                                                    | 1714                                                   |
| Census Tract 9569   | Choctaw       | OWTS                                 | 3.97                                                    | 1324                                                   |
| Census Tract 9570   | Choctaw       | OWTS                                 | 5.77                                                    | 918                                                    |
| Census Tract 203    | Colbert       | OWTS                                 | 2.65                                                    | 1018                                                   |
| Census Tract 203    | Colbert       | Sheffield Utilities                  | 2.63                                                    |                                                        |
| Census Tract 9634   | Crenshaw      | OWTS                                 | 3.79                                                    | 676                                                    |
| Census Tract 9635   | Crenshaw      | OWTS                                 | 4.24                                                    | 642                                                    |
| Census Tract 9636   | Crenshaw      | OWTS                                 | 5.39                                                    | 1121                                                   |
| Census Tract 9637   | Crenshaw      | OWTS                                 | 3.53                                                    | 1315                                                   |
| Census Tract 9638   | Crenshaw      | OWTS                                 | 6.05                                                    | 619                                                    |
| Census Tract 9639   | Crenshaw      | OWTS                                 | 3.89                                                    | 570                                                    |

|                      |           |                                                      |       |      |
|----------------------|-----------|------------------------------------------------------|-------|------|
| Census Tract 9561    | Dallas    | OWTS                                                 | 3.48  | 2423 |
| Census Tract 9562.01 | Dallas    | OWTS                                                 | 3.15  | 949  |
| Census Tract 9562.02 | Dallas    | OWTS                                                 | 3.54  | 851  |
| Census Tract 9563    | Dallas    | OWTS                                                 | 6.03  | 1565 |
| Census Tract 9564    | Dallas    | OWTS                                                 | 10.28 | 1152 |
| Census Tract 9565    | Dallas    | OWTS                                                 | 12.03 | 1386 |
| Census Tract 9567.01 | Dallas    | OWTS                                                 | 3.03  | 820  |
| Census Tract 9567.02 | Dallas    | OWTS                                                 | 4.35  | 649  |
| Census Tract 9568    | Dallas    | OWTS                                                 | 5.96  | 914  |
| Census Tract 9569    | Dallas    | OWTS                                                 | 6.35  | 1050 |
| Census Tract 9570    | Dallas    | OWTS                                                 | 5.81  | 489  |
| Census Tract 9571    | Dallas    | OWTS                                                 | 4.92  | 563  |
| Census Tract 9572    | Dallas    | OWTS                                                 | 6.10  | 585  |
| Census Tract 9573    | Dallas    | OWTS                                                 | 6.00  | 1463 |
| Census Tract 7       | Etowah    | The Water Works & Sewer Board of the City of Gadsden | 2.52  | 500  |
| Census Tract 600     | Greene    | OWTS                                                 | 7.94  | 560  |
| Census Tract 601     | Greene    | OWTS                                                 | 7.63  | 1548 |
| Census Tract 602     | Greene    | OWTS                                                 | 7.20  | 843  |
| Census Tract 400     | Hale      | OWTS                                                 | 3.47  | 1302 |
| Census Tract 401     | Hale      | OWTS                                                 | 4.41  | 525  |
| Census Tract 402     | Hale      | OWTS                                                 | 3.81  | 523  |
| Census Tract 403     | Hale      | OWTS                                                 | 6.15  | 742  |
| Census Tract 404     | Hale      | OWTS                                                 | 6.87  | 2015 |
| Census Tract 405     | Hale      | OWTS                                                 | 7.32  | 543  |
| Census Tract 406     | Houston   | City of Dothan                                       | 3.21  | 768  |
| Census Tract 412     | Houston   | City of Dothan                                       | 2.77  | 825  |
| Census Tract 1       | Jefferson | Jefferson County Sewer                               | 3.33  | 1095 |
| Census Tract 100.01  | Jefferson | Jefferson County Sewer                               | 2.70  | 945  |
| Census Tract 101     | Jefferson | Jefferson County Sewer                               | 5.98  | 642  |
| Census Tract 102     | Jefferson | Jefferson County Sewer                               | 3.47  | 908  |
| Census Tract 103.01  | Jefferson | Jefferson County Sewer                               | 3.46  | 1200 |
| Census Tract 103.02  | Jefferson | Jefferson County Sewer                               | 5.06  | 1560 |
| Census Tract 104.01  | Jefferson | Jefferson County Sewer                               | 3.09  | 1038 |
| Census Tract 105     | Jefferson | Jefferson County Sewer                               | 4.37  | 353  |
| Census Tract 106.02  | Jefferson | Jefferson County Sewer                               | 2.91  | 1968 |
| Census Tract 109     | Jefferson | Jefferson County Sewer                               | 3.37  | 1733 |
| Census Tract 11      | Jefferson | Jefferson County Sewer                               | 2.83  | 1666 |
| Census Tract 110.02  | Jefferson | Jefferson County Sewer                               | 2.89  | 702  |
| Census Tract 112.09  | Jefferson | Jefferson County Sewer                               | 2.85  | 1108 |
| Census Tract 112.10  | Jefferson | Jefferson County Sewer                               | 3.57  | 747  |
| Census Tract 118.03  | Jefferson | Jefferson County Sewer                               | 2.65  | 1508 |
| Census Tract 118.04  | Jefferson | Jefferson County Sewer                               | 3.07  | 1138 |

|                     |           |                        |      |      |
|---------------------|-----------|------------------------|------|------|
| Census Tract 119.01 | Jefferson | Jefferson County Sewer | 3.83 | 516  |
| Census Tract 12     | Jefferson | Jefferson County Sewer | 4.07 | 1279 |
| Census Tract 124.02 | Jefferson | Jefferson County Sewer | 2.54 | 381  |
| Census Tract 125    | Jefferson | Jefferson County Sewer | 2.74 | 474  |
| Census Tract 126.02 | Jefferson | Jefferson County Sewer | 2.51 | 1271 |
| Census Tract 130.02 | Jefferson | Jefferson County Sewer | 3.79 | 807  |
| Census Tract 131    | Jefferson | Jefferson County Sewer | 3.32 | 1396 |
| Census Tract 132    | Jefferson | Jefferson County Sewer | 2.70 | 804  |
| Census Tract 133    | Jefferson | Jefferson County Sewer | 3.49 | 872  |
| Census Tract 136.01 | Jefferson | Jefferson County Sewer | 3.53 | 1413 |
| Census Tract 138.01 | Jefferson | Jefferson County Sewer | 3.72 | 528  |
| Census Tract 14     | Jefferson | Jefferson County Sewer | 2.90 | 816  |
| Census Tract 143.01 | Jefferson | Jefferson County Sewer | 3.49 | 600  |
| Census Tract 15     | Jefferson | Jefferson County Sewer | 5.21 | 1180 |
| Census Tract 16     | Jefferson | Jefferson County Sewer | 2.90 | 965  |
| Census Tract 19.02  | Jefferson | Jefferson County Sewer | 4.92 | 806  |
| Census Tract 20     | Jefferson | Jefferson County Sewer | 3.86 | 1183 |
| Census Tract 21     | Jefferson | Jefferson County Sewer | 4.28 | 1286 |
| Census Tract 22     | Jefferson | Jefferson County Sewer | 3.14 | 940  |
| Census Tract 23.03  | Jefferson | Jefferson County Sewer | 5.04 | 1366 |
| Census Tract 24     | Jefferson | Jefferson County Sewer | 3.30 | 1745 |
| Census Tract 27     | Jefferson | Jefferson County Sewer | 4.53 | 1958 |
| Census Tract 29     | Jefferson | Jefferson County Sewer | 6.75 | 1053 |
| Census Tract 3      | Jefferson | Jefferson County Sewer | 5.02 | 757  |
| Census Tract 30.01  | Jefferson | Jefferson County Sewer | 4.65 | 905  |
| Census Tract 30.02  | Jefferson | Jefferson County Sewer | 4.12 | 1083 |
| Census Tract 31     | Jefferson | Jefferson County Sewer | 3.49 | 1426 |
| Census Tract 32     | Jefferson | Jefferson County Sewer | 3.38 | 513  |
| Census Tract 33     | Jefferson | Jefferson County Sewer | 6.01 | 426  |
| Census Tract 34     | Jefferson | Jefferson County Sewer | 3.44 | 823  |
| Census Tract 35     | Jefferson | Jefferson County Sewer | 2.93 | 662  |
| Census Tract 36     | Jefferson | Jefferson County Sewer | 2.52 | 1845 |
| Census Tract 37     | Jefferson | Jefferson County Sewer | 4.02 | 1812 |
| Census Tract 38.02  | Jefferson | Jefferson County Sewer | 2.70 | 1894 |
| Census Tract 38.03  | Jefferson | Jefferson County Sewer | 2.77 | 1593 |
| Census Tract 39     | Jefferson | Jefferson County Sewer | 3.99 | 587  |
| Census Tract 4      | Jefferson | Jefferson County Sewer | 3.70 | 1096 |
| Census Tract 40     | Jefferson | Jefferson County Sewer | 5.65 | 1429 |
| Census Tract 42     | Jefferson | Jefferson County Sewer | 4.35 | 948  |
| Census Tract 45     | Jefferson | Jefferson County Sewer | 7.19 | 1297 |
| Census Tract 49.01  | Jefferson | Jefferson County Sewer | 2.98 | 793  |
| Census Tract 49.02  | Jefferson | Jefferson County Sewer | 2.76 | 1782 |
| Census Tract 5      | Jefferson | Jefferson County Sewer | 5.47 | 1263 |

|                      |            |                                         |      |      |
|----------------------|------------|-----------------------------------------|------|------|
| Census Tract 50      | Jefferson  | Jefferson County Sewer                  | 2.50 | 1662 |
| Census Tract 51.01   | Jefferson  | Jefferson County Sewer                  | 6.61 | 476  |
| Census Tract 51.04   | Jefferson  | Jefferson County Sewer                  | 2.87 | 1363 |
| Census Tract 52      | Jefferson  | Jefferson County Sewer                  | 3.39 | 1543 |
| Census Tract 55      | Jefferson  | OWTS                                    | 2.61 | 727  |
| Census Tract 55      | Jefferson  | Jefferson County Sewer                  | 5.16 |      |
| Census Tract 57.01   | Jefferson  | Jefferson County Sewer                  | 3.09 | 985  |
| Census Tract 57.02   | Jefferson  | Jefferson County Sewer                  | 4.10 | 1229 |
| Census Tract 58      | Jefferson  | Jefferson County Sewer                  | 2.77 | 1761 |
| Census Tract 59.08   | Jefferson  | Jefferson County Sewer                  | 3.19 | 1379 |
| Census Tract 7       | Jefferson  | Jefferson County Sewer                  | 5.59 | 1037 |
| Census Tract 8       | Jefferson  | Jefferson County Sewer                  | 4.44 | 1535 |
| Census Tract 101     | Lauderdale | Florence Utilities                      | 2.52 | 224  |
| Census Tract 102     | Lauderdale | OWTS                                    | 2.53 | 1002 |
| Census Tract 102     | Lauderdale | Florence Utilities                      | 2.76 |      |
| Census Tract 103     | Lauderdale | OWTS                                    | 3.20 | 566  |
| Census Tract 103     | Lauderdale | Florence Utilities                      | 3.50 |      |
| Census Tract 406.04  | Lee        | OWTS                                    | 2.76 | 2250 |
| Census Tract 407     | Lee        | City of Auburn                          | 2.53 | 217  |
| Census Tract 408     | Lee        | City of Auburn                          | 3.86 | 1489 |
| Census Tract 7808    | Lowndes    | OWTS                                    | 6.55 | 1312 |
| Census Tract 7810    | Lowndes    | OWTS                                    | 5.20 | 1137 |
| Census Tract 7811    | Lowndes    | OWTS                                    | 7.41 | 683  |
| Census Tract 7812    | Lowndes    | OWTS                                    | 4.88 | 1119 |
| Census Tract 2314    | Macon      | OWTS                                    | 4.56 | 637  |
| Census Tract 2315    | Macon      | OWTS                                    | 4.94 | 1194 |
| Census Tract 2316.01 | Macon      | OWTS                                    | 3.21 | 533  |
| Census Tract 2316.02 | Macon      | OWTS                                    | 7.47 | 751  |
| Census Tract 2316.02 | Macon      | Utilities Board of the City of Tuskegee | 2.70 |      |
| Census Tract 2316.03 | Macon      | OWTS                                    | 3.64 | 422  |
| Census Tract 2317    | Macon      | OWTS                                    | 3.04 | 168  |
| Census Tract 2318    | Macon      | OWTS                                    | 6.81 | 481  |
| Census Tract 2319    | Macon      | OWTS                                    | 5.93 | 600  |
| Census Tract 2320    | Macon      | OWTS                                    | 7.21 | 425  |
| Census Tract 2320    | Macon      | Utilities Board of the City of Tuskegee | 2.61 |      |
| Census Tract 2321    | Macon      | OWTS                                    | 4.84 | 643  |
| Census Tract 2322    | Macon      | OWTS                                    | 4.81 | 975  |
| Census Tract 2323    | Macon      | OWTS                                    | 6.86 | 645  |
| Census Tract 12      | Madison    | City of Huntsville                      | 2.82 | 1264 |
| Census Tract 21      | Madison    | OWTS                                    | 2.56 | 1459 |
| Census Tract 9729    | Marengo    | OWTS                                    | 8.50 | 2076 |
| Census Tract 9730    | Marengo    | OWTS                                    | 4.48 | 1431 |

|                    |            |                                                                  |       |      |
|--------------------|------------|------------------------------------------------------------------|-------|------|
| Census Tract 9731  | Marengo    | OWTS                                                             | 8.14  | 769  |
| Census Tract 9732  | Marengo    | OWTS                                                             | 4.93  | 1048 |
| Census Tract 9733  | Marengo    | OWTS                                                             | 5.27  | 697  |
| Census Tract 9734  | Marengo    | OWTS                                                             | 3.18  | 1340 |
| Census Tract 11    | Mobile     | Mobile Area Water & Sewer System                                 | 3.85  | 985  |
| Census Tract 12    | Mobile     | Mobile Area Water & Sewer System                                 | 2.77  | 318  |
| Census Tract 14    | Mobile     | Mobile Area Water & Sewer System                                 | 2.67  | 720  |
| Census Tract 15.01 | Mobile     | Mobile Area Water & Sewer System                                 | 4.07  | 634  |
| Census Tract 15.02 | Mobile     | Mobile Area Water & Sewer System                                 | 5.77  | 504  |
| Census Tract 23.02 | Mobile     | Mobile Area Water & Sewer System                                 | 2.95  | 694  |
| Census Tract 24    | Mobile     | Mobile Area Water & Sewer System                                 | 2.79  | 1265 |
| Census Tract 26    | Mobile     | Mobile Area Water & Sewer System                                 | 2.81  | 1001 |
| Census Tract 27    | Mobile     | Mobile Area Water & Sewer System                                 | 4.48  | 967  |
| Census Tract 32.05 | Mobile     | Mobile Area Water & Sewer System                                 | 2.80  | 1194 |
| Census Tract 36.02 | Mobile     | Mobile Area Water & Sewer System                                 | 3.34  | 580  |
| Census Tract 39.01 | Mobile     | Mobile Area Water & Sewer System                                 | 3.11  | 772  |
| Census Tract 39.02 | Mobile     | Water Works and Sewer Board of the City of Prichard              | 2.50  | 312  |
| Census Tract 39.02 | Mobile     | Mobile Area Water & Sewer System                                 | 3.30  |      |
| Census Tract 4.01  | Mobile     | Mobile Area Water & Sewer System                                 | 3.31  | 489  |
| Census Tract 4.02  | Mobile     | Mobile Area Water & Sewer System                                 | 4.11  | 454  |
| Census Tract 41    | Mobile     | Water Works and Sewer Board of the City of Prichard              | 2.79  | 312  |
| Census Tract 48    | Mobile     | Water Works and Sewer Board of the City of Prichard              | 3.49  | 383  |
| Census Tract 49    | Mobile     | Mobile Area Water & Sewer System                                 | 3.25  | 1276 |
| Census Tract 5     | Mobile     | Mobile Area Water & Sewer System                                 | 3.31  | 589  |
| Census Tract 50    | Mobile     | Water Works and Sewer Board of the City of Prichard              | 2.82  | 598  |
| Census Tract 50    | Mobile     | Utilities Board of the City of Chickasaw                         | 2.98  |      |
| Census Tract 51    | Mobile     | Utilities Board of the City of Chickasaw                         | 2.63  | 477  |
| Census Tract 53    | Mobile     | Mobile Area Water & Sewer System                                 | 2.66  | 788  |
| Census Tract 6     | Mobile     | Mobile Area Water & Sewer System                                 | 2.56  | 594  |
| Census Tract 7.02  | Mobile     | Mobile Area Water & Sewer System                                 | 2.54  | 907  |
| Census Tract 77    | Mobile     | Water Works and Sewer Board of the City of Prichard              | 3.02  | 499  |
| Census Tract 77    | Mobile     | Mobile Area Water & Sewer System                                 | 3.99  |      |
| Census Tract 758   | Monroe     | OWTS                                                             | 3.13  | 572  |
| Census Tract 1     | Montgomery | OWTS                                                             | 3.37  | 258  |
| Census Tract 10    | Montgomery | OWTS                                                             | 12.46 | 553  |
| Census Tract 10    | Montgomery | The Water Works & Sanitary Sewer Board of the City of Montgomery | 2.56  |      |
| Census Tract 3     | Montgomery | OWTS                                                             | 9.73  | 486  |
| Census Tract 51.01 | Montgomery | OWTS                                                             | 3.35  | 1249 |

|                     |            |                    |       |      |
|---------------------|------------|--------------------|-------|------|
| Census Tract 51.02  | Montgomery | OWTS               | 4.52  | 1726 |
| Census Tract 53.01  | Montgomery | OWTS               | 2.64  | 295  |
| Census Tract 54.07  | Montgomery | OWTS               | 2.81  | 1976 |
| Census Tract 55.01  | Montgomery | OWTS               | 2.92  | 635  |
| Census Tract 55.02  | Montgomery | OWTS               | 2.61  | 1221 |
| Census Tract 56.03  | Montgomery | OWTS               | 6.21  | 2384 |
| Census Tract 56.10  | Montgomery | OWTS               | 3.18  | 512  |
| Census Tract 57     | Montgomery | OWTS               | 4.88  | 597  |
| Census Tract 58     | Montgomery | OWTS               | 4.06  | 892  |
| Census Tract 59.01  | Montgomery | OWTS               | 3.50  | 1905 |
| Census Tract 59.02  | Montgomery | OWTS               | 5.12  | 1226 |
| Census Tract 60     | Montgomery | OWTS               | 3.45  | 1127 |
| Census Tract 61     | Montgomery | OWTS               | 4.96  | 833  |
| Census Tract 6      | Morgan     | OWTS               | 2.68  | 880  |
| Census Tract 6868   | Perry      | OWTS               | 8.18  | 303  |
| Census Tract 6870   | Perry      | OWTS               | 7.13  | 1789 |
| Census Tract 6871   | Perry      | OWTS               | 10.92 | 978  |
| Census Tract 1886   | Pike       | OWTS               | 3.87  | 718  |
| Census Tract 1887   | Pike       | OWTS               | 4.18  | 642  |
| Census Tract 1888   | Pike       | OWTS               | 3.68  | 747  |
| Census Tract 1889   | Pike       | OWTS               | 8.46  | 1655 |
| Census Tract 1890   | Pike       | OWTS               | 4.29  | 3068 |
| Census Tract 1891   | Pike       | OWTS               | 7.45  | 2473 |
| Census Tract 1892   | Pike       | OWTS               | 3.84  | 982  |
| Census Tract 1893   | Pike       | OWTS               | 4.80  | 1316 |
| Census Tract 303    | Russell    | OWTS               | 5.31  | 1358 |
| Census Tract 304.01 | Russell    | OWTS               | 3.21  | 2550 |
| Census Tract 304.02 | Russell    | OWTS               | 3.42  | 1447 |
| Census Tract 305    | Russell    | OWTS               | 4.68  | 957  |
| Census Tract 306    | Russell    | OWTS               | 5.83  | 2982 |
| Census Tract 308    | Russell    | OWTS               | 8.37  | 1376 |
| Census Tract 309.01 | Russell    | OWTS               | 5.23  | 2694 |
| Census Tract 309.02 | Russell    | OWTS               | 2.82  | 3955 |
| Census Tract 310    | Russell    | OWTS               | 3.19  | 1419 |
| Census Tract 311    | Russell    | OWTS               | 5.54  | 699  |
| Census Tract 312    | Russell    | OWTS               | 3.96  | 1419 |
| Census Tract 113    | Sumter     | OWTS               | 7.74  | 2420 |
| Census Tract 114    | Sumter     | OWTS               | 8.19  | 585  |
| Census Tract 115    | Sumter     | OWTS               | 6.78  | 1678 |
| Census Tract 116    | Sumter     | OWTS               | 6.47  | 519  |
| Census Tract 118    | Talladega  | OWTS               | 2.74  | 918  |
| Census Tract 114.01 | Tuscaloosa | City of Tuscaloosa | 3.30  | 573  |
| Census Tract 347    | Wilcox     | OWTS               | 10.18 | 523  |

|                  |        |      |      |      |
|------------------|--------|------|------|------|
| Census Tract 348 | Wilcox | OWTS | 6.04 | 1644 |
| Census Tract 351 | Wilcox | OWTS | 4.67 | 1137 |
| Census Tract 352 | Wilcox | OWTS | 5.47 | 550  |



**Table S4: Census Tracts with Capital Cost of Onsite Wastewater Treatment Systems (OWTS) that are Greater than 50% of the Median Household Income (MHI)**

| Census Tract         | County     | Capital Cost of OWTS as % of MHI |
|----------------------|------------|----------------------------------|
| Census Tract 10      | Montgomery | 137.01                           |
| Census Tract 9565    | Dallas     | 132.29                           |
| Census Tract 6871    | Perry      | 120.00                           |
| Census Tract 9564    | Dallas     | 113.00                           |
| Census Tract 347     | Wilcox     | 111.93                           |
| Census Tract 3       | Montgomery | 106.93                           |
| Census Tract 9729    | Marengo    | 93.46                            |
| Census Tract 1889    | Pike       | 92.99                            |
| Census Tract 9507    | Barbour    | 92.56                            |
| Census Tract 308     | Russell    | 92.05                            |
| Census Tract 114     | Sumter     | 90.01                            |
| Census Tract 6868    | Perry      | 89.94                            |
| Census Tract 9731    | Marengo    | 89.51                            |
| Census Tract 600     | Greene     | 87.27                            |
| Census Tract 113     | Sumter     | 85.07                            |
| Census Tract 601     | Greene     | 83.90                            |
| Census Tract 2316.02 | Macon      | 82.12                            |
| Census Tract 1891    | Pike       | 81.92                            |
| Census Tract 7811    | Lowndes    | 81.42                            |
| Census Tract 405     | Hale       | 80.44                            |
| Census Tract 2320    | Macon      | 79.25                            |
| Census Tract 602     | Greene     | 79.18                            |
| Census Tract 9521    | Bullock    | 78.92                            |
| Census Tract 9509    | Barbour    | 78.60                            |
| Census Tract 6870    | Perry      | 78.35                            |
| Census Tract 404     | Hale       | 75.52                            |
| Census Tract 2323    | Macon      | 75.38                            |
| Census Tract 2318    | Macon      | 74.89                            |
| Census Tract 115     | Sumter     | 74.52                            |
| Census Tract 302     | Russell    | 73.90                            |
| Census Tract 9504    | Barbour    | 73.78                            |
| Census Tract 9506    | Barbour    | 71.96                            |
| Census Tract 7808    | Lowndes    | 71.96                            |
| Census Tract 116     | Sumter     | 71.11                            |
| Census Tract 9569    | Dallas     | 69.80                            |
| Census Tract 307     | Russell    | 69.13                            |
| Census Tract 9503    | Barbour    | 68.63                            |
| Census Tract 56.03   | Montgomery | 68.27                            |
| Census Tract 403     | Hale       | 67.56                            |
| Census Tract 9572    | Dallas     | 67.10                            |
| Census Tract 9638    | Crenshaw   | 66.45                            |
| Census Tract 348     | Wilcox     | 66.39                            |
| Census Tract 9563    | Dallas     | 66.25                            |
| Census Tract 9531    | Butler     | 66.16                            |
| Census Tract 9573    | Dallas     | 65.95                            |
| Census Tract 9568    | Dallas     | 65.47                            |

|                     |            |       |
|---------------------|------------|-------|
| Census Tract 2319   | Macon      | 65.17 |
| Census Tract 306    | Russell    | 64.09 |
| Census Tract 9570   | Dallas     | 63.82 |
| Census Tract 9570   | Choctaw    | 63.43 |
| Census Tract 9522   | Bullock    | 63.31 |
| Census Tract 9534   | Butler     | 63.11 |
| Census Tract 9567   | Choctaw    | 61.46 |
| Census Tract 311    | Russell    | 60.92 |
| Census Tract 9502   | Barbour    | 60.22 |
| Census Tract 352    | Wilcox     | 60.09 |
| Census Tract 9568   | Choctaw    | 59.49 |
| Census Tract 9636   | Crenshaw   | 59.26 |
| Census Tract 303    | Russell    | 58.35 |
| Census Tract 9733   | Marengo    | 57.89 |
| Census Tract 309.01 | Russell    | 57.53 |
| Census Tract 7810   | Lowndes    | 57.20 |
| Census Tract 59.02  | Montgomery | 56.30 |
| Census Tract 61     | Montgomery | 54.56 |
| Census Tract 9508   | Barbour    | 54.50 |
| Census Tract 2315   | Macon      | 54.35 |
| Census Tract 9732   | Marengo    | 54.21 |
| Census Tract 9571   | Dallas     | 54.13 |
| Census Tract 7812   | Lowndes    | 53.68 |
| Census Tract 57     | Montgomery | 53.64 |
| Census Tract 2321   | Macon      | 53.24 |
| Census Tract 2322   | Macon      | 52.89 |
| Census Tract 1893   | Pike       | 52.71 |
| Census Tract 9535   | Butler     | 51.91 |
| Census Tract 305    | Russell    | 51.45 |
| Census Tract 351    | Wilcox     | 51.37 |
| Census Tract 9501   | Barbour    | 51.27 |
| Census Tract 9530   | Butler     | 50.47 |
| Census Tract 2314   | Macon      | 50.16 |

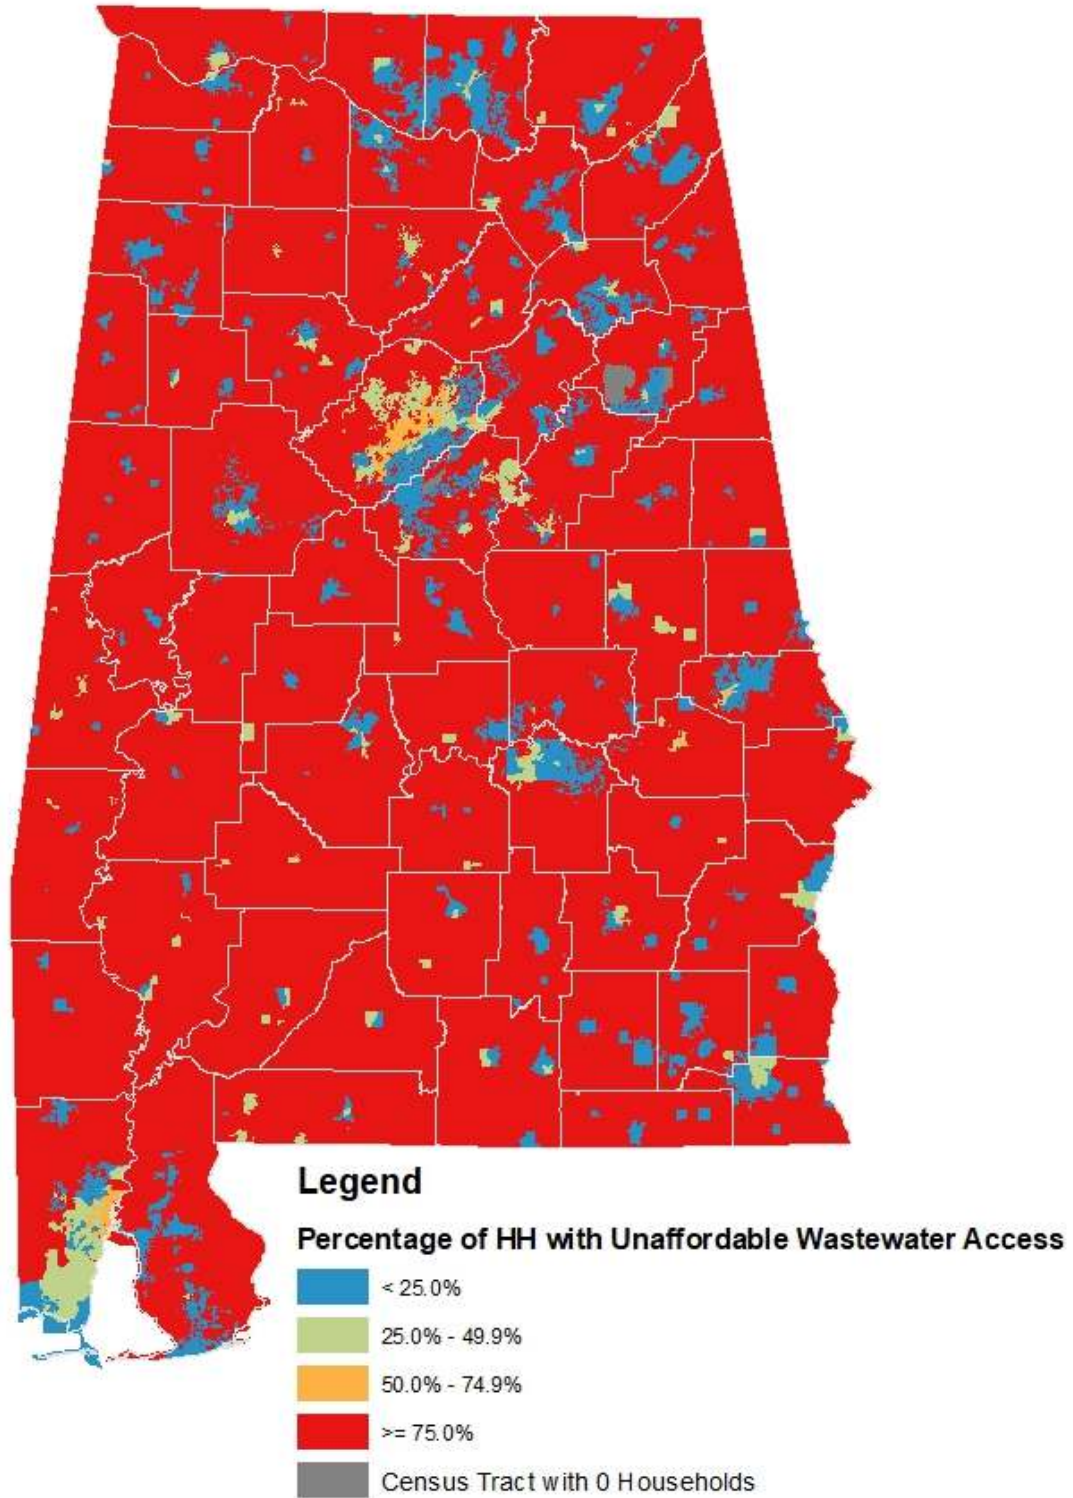

**Fig. S4: Households (HH) with Unaffordable Wastewater Expenses in Alabama with OWTS Expenses Represented as Lump Sum of Capital Costs**

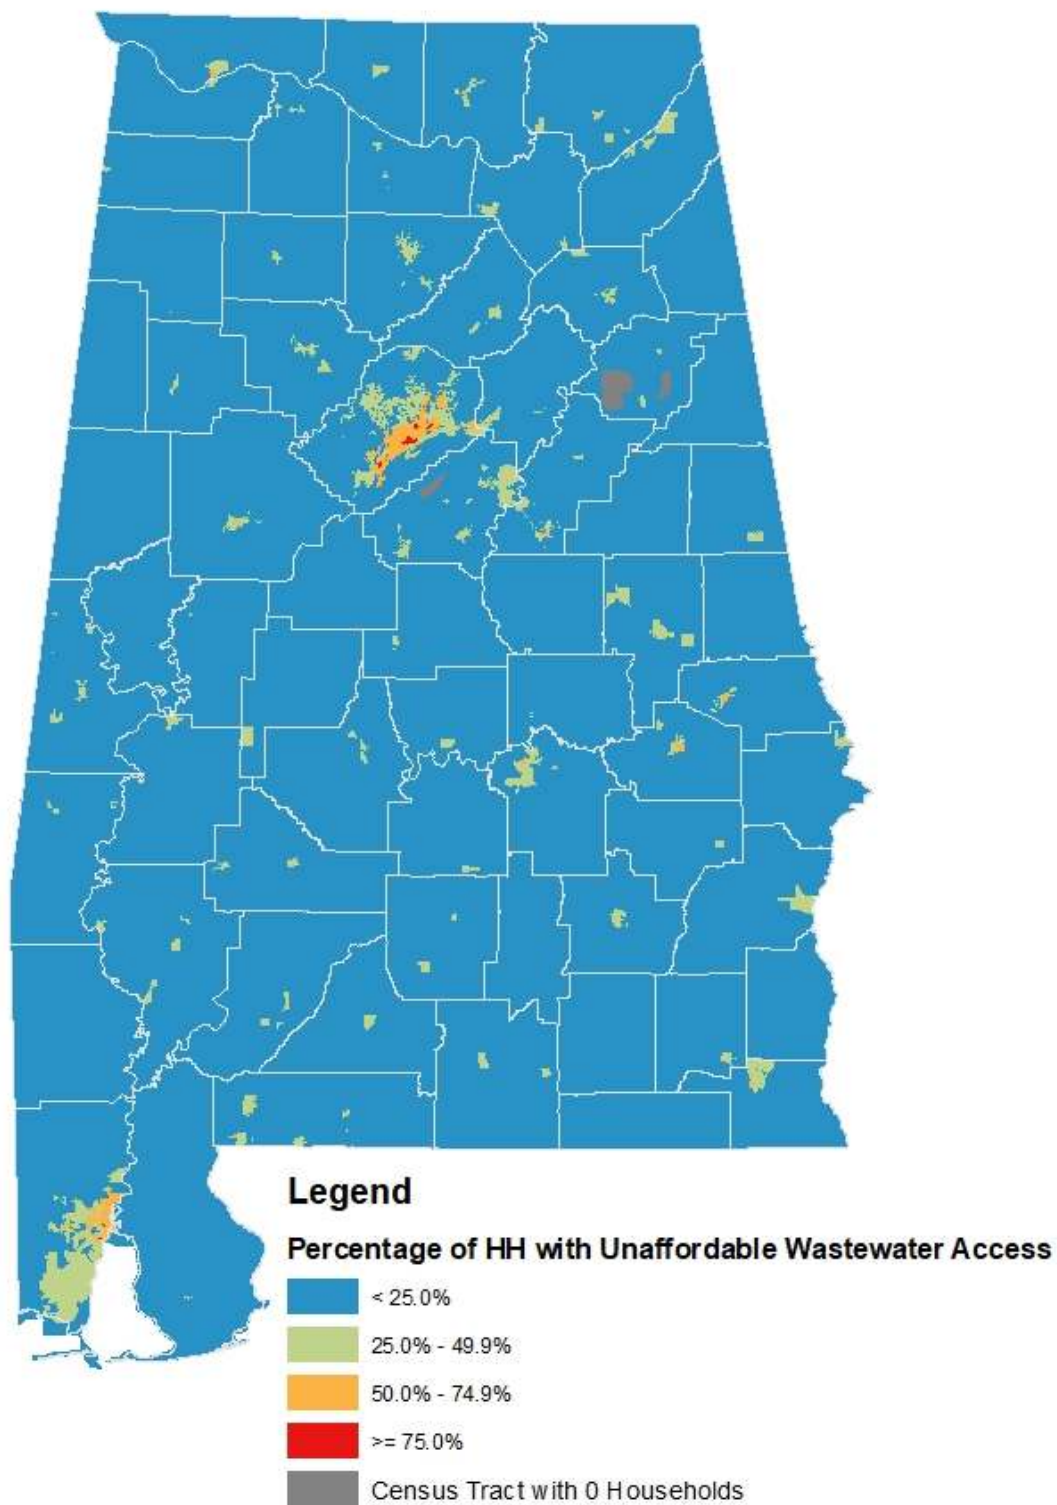

**Fig. S5: Households (HH) with Unaffordable Wastewater Expenses in Alabama with OWTS Expenses Represented as Annualized Pumping Costs**

**Table S5: Summary of Estimated Households (HH) in Alabama with Unaffordable Wastewater Access**

| <b>Summary of Results</b>                                                      | <b>Number of Households</b> | <b>Percentage of Households</b> |
|--------------------------------------------------------------------------------|-----------------------------|---------------------------------|
| <b>Total Households in Alabama</b>                                             | <b>1,867,893</b>            |                                 |
| Estimated Number of Households on Sewer                                        | 1,223,659                   | 65.5%                           |
| Estimated Number of Households on OWTS                                         | 644,234                     | 34.5%                           |
|                                                                                |                             |                                 |
| <b>Total Households with Unaffordable Wastewater Access</b>                    | <b>443,237</b>              | <b>23.7%</b>                    |
|                                                                                |                             |                                 |
| Households with Unaffordable Sewer Access                                      | 278,086                     | 14.9%                           |
|                                                                                |                             |                                 |
| OWTS Represented as Annual Loan Payment and Annualized Pumping Cost (Figure 3) |                             |                                 |
| Household with Unaffordable OWTS Access                                        | 165,151                     | 8.8%                            |
| Households with Conventional Systems                                           | 116,168                     | 6.2%                            |
| Households with Mound Systems                                                  | 48,983                      | 2.6%                            |
|                                                                                |                             |                                 |
| OWTS Represented as Lump Sum of Capital Costs (Figure S4)                      |                             |                                 |
| Household with Unaffordable OWTS Access                                        | 644,234                     | 34.5%                           |
| Households with Conventional Systems                                           | 576,830                     | 30.9%                           |
| Households with Mound Systems                                                  | 67,404                      | 3.6%                            |
|                                                                                |                             |                                 |
| OWTS Represented as Annualized Pumping Costs (Figure S5)                       |                             |                                 |
| Household with Unaffordable OWTS Access                                        | 20,109                      | 1.1%                            |
| Households with Conventional Systems                                           | 16,767                      | 0.9%                            |
| Households with Mound Systems                                                  | 3,342                       | 0.2%                            |

**Table S6: Estimates for Households with Unaffordable Wastewater Access based on Census Tract Level Household Incomes**

| Census Tract | County  | Municipality   | Utility                              | Est. No. HH | Figure 3           |                   |               |                 | Figure S4          |                   |               |                 | Figure S5          |                   |               |                 |
|--------------|---------|----------------|--------------------------------------|-------------|--------------------|-------------------|---------------|-----------------|--------------------|-------------------|---------------|-----------------|--------------------|-------------------|---------------|-----------------|
|              |         |                |                                      |             | Annual WW Expenses | Afford. Income TH | % HH Below TH | No. HH Below TH | Annual WW Expenses | Afford. Income TH | % HH Below TH | No. HH Below TH | Annual WW Expenses | Afford. Income TH | % HH Below TH | No. HH Below TH |
| 201          | Autauga | Prattville     | City of Prattville                   | 709         | \$395              | \$15,792          | 12.9%         | 92              | \$395              | \$15,792          | 12.9%         | 92              | \$395              | \$15,792          | 12.9%         | 92              |
| 202          | Autauga | Prattville     | City of Prattville                   | 688         | \$395              | \$15,792          | 22.2%         | 153             | \$395              | \$15,792          | 22.2%         | 153             | \$395              | \$15,792          | 22.2%         | 153             |
| 203          | Autauga | Unincorporated | OWTS                                 | 128         | \$530              | \$21,192          | 18.2%         | 23              | \$5,000            | \$200,000         | 100.0%        | 128             | \$100              | \$4,000           | 3.3%          | 4               |
| 203          | Autauga | Prattville     | City of Prattville                   | 1232        | \$395              | \$15,792          | 13.8%         | 169             | \$395              | \$15,792          | 13.8%         | 169             | \$395              | \$15,792          | 13.8%         | 169             |
| 204          | Autauga | Unincorporated | OWTS                                 | 151         | \$530              | \$21,192          | 12.0%         | 18              | \$5,000            | \$200,000         | 100.0%        | 151             | \$100              | \$4,000           | 0.8%          | 1               |
| 204          | Autauga | Prattville     | City of Prattville                   | 1524        | \$395              | \$15,792          | 6.9%          | 105             | \$395              | \$15,792          | 6.9%          | 105             | \$395              | \$15,792          | 6.9%          | 105             |
| 205          | Autauga | Unincorporated | OWTS                                 | 855         | \$530              | \$21,192          | 13.5%         | 116             | \$5,000            | \$200,000         | 100.0%        | 855             | \$100              | \$4,000           | 2.5%          | 22              |
| 205          | Autauga | Prattville     | City of Prattville                   | 3628        | \$395              | \$15,792          | 9.1%          | 329             | \$395              | \$15,792          | 9.1%          | 329             | \$395              | \$15,792          | 9.1%          | 329             |
| 206          | Autauga | Unincorporated | OWTS                                 | 155         | \$530              | \$21,192          | 23.9%         | 37              | \$5,000            | \$200,000         | 100.0%        | 155             | \$100              | \$4,000           | 4.7%          | 7               |
| 206          | Autauga | Prattville     | City of Prattville                   | 1185        | \$395              | \$15,792          | 17.0%         | 202             | \$395              | \$15,792          | 17.0%         | 202             | \$395              | \$15,792          | 17.0%         | 202             |
| 207          | Autauga | Prattville     | City of Prattville                   | 1338        | \$395              | \$15,792          | 22.5%         | 302             | \$395              | \$15,792          | 22.5%         | 302             | \$395              | \$15,792          | 22.5%         | 302             |
| 208.01       | Autauga | Prattville     | City of Prattville                   | 1110        | \$395              | \$15,792          | 7.3%          | 82              | \$395              | \$15,792          | 7.3%          | 82              | \$395              | \$15,792          | 7.3%          | 82              |
| 208.02       | Autauga | Unincorporated | OWTS                                 | 2799        | \$530              | \$21,192          | 17.9%         | 501             | \$5,000            | \$200,000         | 99.9%         | 2799            | \$100              | \$4,000           | 1.6%          | 44              |
| 208.02       | Autauga | Prattville     | City of Prattville                   | 1233        | \$395              | \$15,792          | 10.7%         | 131             | \$395              | \$15,792          | 10.7%         | 131             | \$395              | \$15,792          | 10.7%         | 131             |
| 208.02       | Autauga | Millbrook      | City of Millbrook                    | 66          | \$288              | \$11,520          | 5.6%          | 4               | \$288              | \$11,520          | 5.6%          | 4               | \$288              | \$11,520          | 5.6%          | 4               |
| 209          | Autauga | Unincorporated | OWTS                                 | 2295        | \$530              | \$21,192          | 14.8%         | 339             | \$5,000            | \$200,000         | 100.0%        | 2295            | \$100              | \$4,000           | 2.7%          | 62              |
| 210          | Autauga | Unincorporated | OWTS                                 | 977         | \$530              | \$21,192          | 24.3%         | 237             | \$5,000            | \$200,000         | 100.0%        | 977             | \$100              | \$4,000           | 3.6%          | 35              |
| 210          | Autauga | Billingsley    | OWTS                                 | 9           | \$530              | \$21,194          | 24.3%         | 2               | \$5,000            | \$200,000         | 100.0%        | 9               | \$100              | \$4,000           | 3.6%          | 0               |
| 211          | Autauga | Unincorporated | OWTS                                 | 980         | \$530              | \$21,192          | 31.3%         | 307             | \$5,000            | \$200,000         | 100.0%        | 980             | \$100              | \$4,000           | 4.5%          | 44              |
| 211          | Autauga | Autaugaville   | Town of Autaugaville                 | 335         | \$429              | \$17,160          | 28.4%         | 95              | \$429              | \$17,160          | 28.4%         | 95              | \$429              | \$17,160          | 28.4%         | 95              |
| 101          | Baldwin | Unincorporated | OWTS                                 | 1395        | \$530              | \$21,192          | 19.1%         | 266             | \$5,000            | \$200,000         | 100.0%        | 1395            | \$100              | \$4,000           | 4.7%          | 66              |
| 102          | Baldwin | Unincorporated | OWTS                                 | 125         | \$530              | \$21,192          | 24.7%         | 31              | \$5,000            | \$200,000         | 99.9%         | 125             | \$100              | \$4,000           | 3.0%          | 4               |
| 102          | Baldwin | Perdido        | OWTS                                 | 162         | \$530              | \$21,194          | 24.7%         | 40              | \$5,000            | \$200,000         | 99.9%         | 162             | \$100              | \$4,000           | 3.0%          | 5               |
| 102          | Baldwin | Bay Minette    | North Baldwin Utilities- Bay Minette | 960         | \$320              | \$12,816          | 12.8%         | 123             | \$320              | \$12,816          | 12.8%         | 123             | \$320              | \$12,816          | 12.8%         | 123             |
| 103          | Baldwin | Spanish Fort   | Baldwin County Sewer Service, LLC    | 2106        | \$654              | \$26,160          | 17.7%         | 373             | \$654              | \$26,160          | 17.7%         | 373             | \$654              | \$26,160          | 17.7%         | 373             |
| 103          | Baldwin | Bay Minette    | North Baldwin Utilities- Bay Minette | 650         | \$320              | \$12,816          | 4.0%          | 26              | \$320              | \$12,816          | 4.0%          | 26              | \$320              | \$12,816          | 4.0%          | 26              |
| 104          | Baldwin | Unincorporated | OWTS                                 | 1081        | \$530              | \$21,192          | 14.5%         | 156             | \$5,000            | \$200,000         | 100.0%        | 1081            | \$100              | \$4,000           | 1.9%          | 21              |
| 104          | Baldwin | Loxley         | Town of Loxley                       | 582         | \$331              | \$13,243          | 7.8%          | 46              | \$331              | \$13,243          | 7.8%          | 46              | \$331              | \$13,243          | 7.8%          | 46              |
| 104          | Baldwin | Bay Minette    | North Baldwin Utilities- Bay Minette | 186         | \$320              | \$12,816          | 7.4%          | 14              | \$320              | \$12,816          | 7.4%          | 14              | \$320              | \$12,816          | 7.4%          | 14              |
| 105          | Baldwin | Unincorporated | OWTS                                 | 792         | \$530              | \$21,192          | 23.7%         | 188             | \$5,000            | \$200,000         | 100.0%        | 792             | \$100              | \$4,000           | 3.0%          | 23              |

|        |         |                |                                               |      |       |          |       |     |         |           |        |      |       |          |       |     |
|--------|---------|----------------|-----------------------------------------------|------|-------|----------|-------|-----|---------|-----------|--------|------|-------|----------|-------|-----|
| 105    | Baldwin | Bay Minette    | North Baldwin Utilities- Bay Minette          | 1078 | \$320 | \$12,816 | 10.7% | 115 | \$320   | \$12,816  | 10.7%  | 115  | \$320 | \$12,816 | 10.7% | 115 |
| 106    | Baldwin | Unincorporated | OWTS                                          | 662  | \$530 | \$21,192 | 35.4% | 235 | \$5,000 | \$200,000 | 99.9%  | 662  | \$100 | \$4,000  | 2.6%  | 17  |
| 106    | Baldwin | Bay Minette    | North Baldwin Utilities- Bay Minette          | 460  | \$320 | \$12,816 | 17.7% | 81  | \$320   | \$12,816  | 17.7%  | 81   | \$320 | \$12,816 | 17.7% | 81  |
| 107.01 | Baldwin | Spanish Fort   | Baldwin County Sewer Service, LLC             | 2150 | \$654 | \$26,160 | 11.1% | 238 | \$654   | \$26,160  | 11.1%  | 238  | \$654 | \$26,160 | 11.1% | 238 |
| 107.01 | Baldwin | Daphne         | Utilities Board of the City of Daphne         | 1184 | \$583 | \$23,304 | 9.7%  | 114 | \$583   | \$23,304  | 9.7%   | 114  | \$583 | \$23,304 | 9.7%  | 114 |
| 107.03 | Baldwin | Spanish Fort   | Baldwin County Sewer Service, LLC             | 3365 | \$654 | \$26,160 | 6.3%  | 211 | \$654   | \$26,160  | 6.3%   | 211  | \$654 | \$26,160 | 6.3%  | 211 |
| 107.03 | Baldwin | Daphne         | Utilities Board of the City of Daphne         | 1888 | \$583 | \$23,304 | 4.9%  | 93  | \$583   | \$23,304  | 4.9%   | 93   | \$583 | \$23,304 | 4.9%  | 93  |
| 107.03 | Baldwin | Fairhope       | City of Fairhope                              | 1548 | \$360 | \$14,410 | 3.5%  | 53  | \$360   | \$14,410  | 3.5%   | 53   | \$360 | \$14,410 | 3.5%  | 53  |
| 107.03 | Baldwin | Loxley         | Town of Loxley                                | 73   | \$331 | \$13,243 | 3.4%  | 2   | \$331   | \$13,243  | 3.4%   | 2    | \$331 | \$13,243 | 3.4%  | 2   |
| 107.04 | Baldwin | Daphne         | Utilities Board of the City of Daphne         | 1883 | \$583 | \$23,304 | 17.4% | 328 | \$583   | \$23,304  | 17.4%  | 328  | \$583 | \$23,304 | 17.4% | 328 |
| 107.05 | Baldwin | Spanish Fort   | Baldwin County Sewer Service, LLC             | 709  | \$654 | \$26,160 | 13.3% | 95  | \$654   | \$26,160  | 13.3%  | 95   | \$654 | \$26,160 | 13.3% | 95  |
| 107.05 | Baldwin | Daphne         | Utilities Board of the City of Daphne         | 3057 | \$583 | \$23,304 | 11.4% | 349 | \$583   | \$23,304  | 11.4%  | 349  | \$583 | \$23,304 | 11.4% | 349 |
| 108    | Baldwin | Daphne         | Utilities Board of the City of Daphne         | 2184 | \$583 | \$23,304 | 19.7% | 429 | \$583   | \$23,304  | 19.7%  | 429  | \$583 | \$23,304 | 19.7% | 429 |
| 108    | Baldwin | Fairhope       | City of Fairhope                              | 424  | \$360 | \$14,410 | 8.4%  | 36  | \$360   | \$14,410  | 8.4%   | 36   | \$360 | \$14,410 | 8.4%  | 36  |
| 109.03 | Baldwin | Unincorporated | OWTS                                          | 1804 | \$530 | \$21,192 | 19.3% | 348 | \$5,000 | \$200,000 | 99.9%  | 1804 | \$100 | \$4,000  | 4.2%  | 76  |
| 109.03 | Baldwin | Loxley         | Town of Loxley                                | 48   | \$331 | \$13,243 | 12.5% | 6   | \$331   | \$13,243  | 12.5%  | 6    | \$331 | \$13,243 | 12.5% | 6   |
| 109.04 | Baldwin | Unincorporated | OWTS                                          | 2335 | \$530 | \$21,192 | 16.1% | 376 | \$5,000 | \$200,000 | 100.0% | 2335 | \$100 | \$4,000  | 1.5%  | 35  |
| 109.04 | Baldwin | Loxley         | Town of Loxley                                | 17   | \$331 | \$13,243 | 7.0%  | 1   | \$331   | \$13,243  | 7.0%   | 1    | \$331 | \$13,243 | 7.0%  | 1   |
| 109.05 | Baldwin | Unincorporated | OWTS                                          | 20   | \$530 | \$21,192 | 18.5% | 4   | \$5,000 | \$200,000 | 99.9%  | 20   | \$100 | \$4,000  | 2.2%  | 0   |
| 109.05 | Baldwin | Silverhill     | Baldwin County Sewer Service, LLC             | 2007 | \$654 | \$26,160 | 22.4% | 450 | \$654   | \$26,160  | 22.4%  | 450  | \$654 | \$26,160 | 22.4% | 450 |
| 109.05 | Baldwin | Robertsdale    | City of Robertsdale                           | 1368 | \$417 | \$16,666 | 15.3% | 210 | \$417   | \$16,666  | 15.3%  | 210  | \$417 | \$16,666 | 15.3% | 210 |
| 109.06 | Baldwin | Unincorporated | OWTS                                          | 652  | \$530 | \$21,192 | 22.0% | 144 | \$5,000 | \$200,000 | 100.0% | 652  | \$100 | \$4,000  | 3.6%  | 23  |
| 109.06 | Baldwin | Robertsdale    | City of Robertsdale                           | 1083 | \$417 | \$16,666 | 17.5% | 190 | \$417   | \$16,666  | 17.5%  | 190  | \$417 | \$16,666 | 17.5% | 190 |
| 110    | Baldwin | Unincorporated | OWTS                                          | 1279 | \$530 | \$21,192 | 13.7% | 176 | \$5,000 | \$200,000 | 100.0% | 1279 | \$100 | \$4,000  | 1.5%  | 19  |
| 110    | Baldwin | Summerdale     | Baldwin County Sewer Service, LLC- Summerdale | 332  | \$720 | \$28,800 | 24.9% | 83  | \$720   | \$28,800  | 24.9%  | 83   | \$720 | \$28,800 | 24.9% | 83  |
| 111.01 | Baldwin | Unincorporated | OWTS                                          | 532  | \$530 | \$21,192 | 12.2% | 65  | \$5,000 | \$200,000 | 100.0% | 532  | \$100 | \$4,000  | 1.8%  | 10  |
| 111.01 | Baldwin | Fairhope       | City of Fairhope                              | 3732 | \$360 | \$14,410 | 8.8%  | 329 | \$360   | \$14,410  | 8.8%   | 329  | \$360 | \$14,410 | 8.8%  | 329 |
| 111.02 | Baldwin | Unincorporated | OWTS                                          | 1229 | \$530 | \$21,192 | 16.3% | 201 | \$5,000 | \$200,000 | 100.0% | 1229 | \$100 | \$4,000  | 2.8%  | 34  |
| 111.02 | Baldwin | Fairhope       | City of Fairhope                              | 628  | \$360 | \$14,410 | 9.4%  | 59  | \$360   | \$14,410  | 9.4%   | 59   | \$360 | \$14,410 | 9.4%  | 59  |
| 112.01 | Baldwin | Fairhope       | City of Fairhope                              | 1921 | \$360 | \$14,410 | 11.2% | 214 | \$360   | \$14,410  | 11.2%  | 214  | \$360 | \$14,410 | 11.2% | 214 |

|        |         |                  |                                                              |      |       |          |       |     |         |           |        |      |       |          |       |     |
|--------|---------|------------------|--------------------------------------------------------------|------|-------|----------|-------|-----|---------|-----------|--------|------|-------|----------|-------|-----|
| 112.02 | Baldwin | Unincorporated   | OWTS                                                         | 22   | \$530 | \$21,192 | 13.2% | 3   | \$5,000 | \$200,000 | 100.0% | 22   | \$100 | \$4,000  | 1.8%  | 0   |
| 112.02 | Baldwin | Fairhope         | City of Fairhope                                             | 2269 | \$360 | \$14,410 | 6.6%  | 150 | \$360   | \$14,410  | 6.6%   | 150  | \$360 | \$14,410 | 6.6%  | 150 |
| 113    | Baldwin | Unincorporated   | OWTS                                                         | 928  | \$530 | \$21,192 | 8.8%  | 82  | \$5,000 | \$200,000 | 100.0% | 928  | \$100 | \$4,000  | 0.6%  | 5   |
| 113    | Baldwin | Fairhope         | City of Fairhope                                             | 1053 | \$360 | \$14,410 | 5.0%  | 53  | \$360   | \$14,410  | 5.0%   | 53   | \$360 | \$14,410 | 5.0%  | 53  |
| 114.01 | Baldwin | Unincorporated   | OWTS                                                         | 4116 | \$530 | \$21,192 | 17.4% | 717 | \$5,000 | \$200,000 | 100.0% | 4116 | \$100 | \$4,000  | 2.9%  | 119 |
| 114.01 | Baldwin | Magnolia Springs | OWTS                                                         | 62   | \$530 | \$21,194 | 17.4% | 11  | \$5,000 | \$200,000 | 100.0% | 62   | \$100 | \$4,000  | 2.9%  | 2   |
| 114.01 | Baldwin | Summerdale       | Baldwin County Sewer Service, LLC- Summerdale                | 3    | \$720 | \$28,800 | 25.7% | 1   | \$720   | \$28,800  | 25.7%  | 1    | \$720 | \$28,800 | 25.7% | 1   |
| 114.01 | Baldwin | Foley            | The Utilities Board of the City of Foley (Riviera Utilities) | 255  | \$539 | \$21,552 | 17.8% | 45  | \$539   | \$21,552  | 17.8%  | 45   | \$539 | \$21,552 | 17.8% | 45  |
| 114.03 | Baldwin | Unincorporated   | OWTS                                                         | 1850 | \$530 | \$21,192 | 14.1% | 261 | \$5,000 | \$200,000 | 100.0% | 1850 | \$100 | \$4,000  | 1.0%  | 19  |
| 114.03 | Baldwin | Foley            | The Utilities Board of the City of Foley (Riviera Utilities) | 1422 | \$539 | \$21,552 | 14.6% | 207 | \$539   | \$21,552  | 14.6%  | 207  | \$539 | \$21,552 | 14.6% | 207 |
| 114.03 | Baldwin | Orange Beach     | Orange Beach Sewer Department                                | 371  | \$336 | \$13,440 | 4.9%  | 18  | \$336   | \$13,440  | 4.9%   | 18   | \$336 | \$13,440 | 4.9%  | 18  |
| 114.03 | Baldwin | Gulf Shores      | Utilities Board of the City of Gulf Shores                   | 1641 | \$297 | \$11,880 | 3.8%  | 63  | \$297   | \$11,880  | 3.8%   | 63   | \$297 | \$11,880 | 3.8%  | 63  |
| 114.05 | Baldwin | Unincorporated   | OWTS                                                         | 465  | \$530 | \$21,192 | 7.9%  | 37  | \$5,000 | \$200,000 | 100.0% | 465  | \$100 | \$4,000  | 1.3%  | 6   |
| 114.05 | Baldwin | Orange Beach     | Orange Beach Sewer Department                                | 1623 | \$336 | \$13,440 | 4.6%  | 74  | \$336   | \$13,440  | 4.6%   | 74   | \$336 | \$13,440 | 4.6%  | 74  |
| 114.06 | Baldwin | Orange Beach     | Orange Beach Sewer Department                                | 1051 | \$336 | \$13,440 | 6.7%  | 71  | \$336   | \$13,440  | 6.7%   | 71   | \$336 | \$13,440 | 6.7%  | 71  |
| 114.06 | Baldwin | Gulf Shores      | Utilities Board of the City of Gulf Shores                   | 515  | \$297 | \$11,880 | 6.1%  | 32  | \$297   | \$11,880  | 6.1%   | 32   | \$297 | \$11,880 | 6.1%  | 32  |
| 114.07 | Baldwin | Unincorporated   | OWTS                                                         | 270  | \$530 | \$21,192 | 18.8% | 51  | \$5,000 | \$200,000 | 100.0% | 270  | \$100 | \$4,000  | 3.2%  | 9   |
| 114.07 | Baldwin | Gulf Shores      | Utilities Board of the City of Gulf Shores                   | 2038 | \$297 | \$11,880 | 10.3% | 210 | \$297   | \$11,880  | 10.3%  | 210  | \$297 | \$11,880 | 10.3% | 210 |
| 114.08 | Baldwin | Unincorporated   | OWTS                                                         | 146  | \$530 | \$21,192 | 11.0% | 16  | \$5,000 | \$200,000 | 100.0% | 146  | \$100 | \$4,000  | 2.9%  | 4   |
| 114.08 | Baldwin | Gulf Shores      | Utilities Board of the City of Gulf Shores                   | 105  | \$297 | \$11,880 | 7.8%  | 8   | \$297   | \$11,880  | 7.8%   | 8    | \$297 | \$11,880 | 7.8%  | 8   |
| 115.01 | Baldwin | Unincorporated   | OWTS                                                         | 209  | \$530 | \$21,192 | 19.6% | 41  | \$5,000 | \$200,000 | 100.0% | 209  | \$100 | \$4,000  | 3.4%  | 7   |
| 115.01 | Baldwin | Summerdale       | Baldwin County Sewer Service, LLC- Summerdale                | 41   | \$720 | \$28,800 | 28.5% | 12  | \$720   | \$28,800  | 28.5%  | 12   | \$720 | \$28,800 | 28.5% | 12  |
| 115.01 | Baldwin | Foley            | The Utilities Board of the City of Foley (Riviera Utilities) | 2720 | \$539 | \$21,552 | 20.0% | 545 | \$539   | \$21,552  | 20.0%  | 545  | \$539 | \$21,552 | 20.0% | 545 |
| 115.02 | Baldwin | Unincorporated   | OWTS                                                         | 878  | \$530 | \$21,192 | 23.5% | 206 | \$5,000 | \$200,000 | 100.0% | 878  | \$100 | \$4,000  | 2.0%  | 18  |



|        |         |                |                                                              |      |         |          |       |      |          |           |        |      |       |          |       |      |
|--------|---------|----------------|--------------------------------------------------------------|------|---------|----------|-------|------|----------|-----------|--------|------|-------|----------|-------|------|
| 115.02 | Baldwin | Foley          | The Utilities Board of the City of Foley (Riviera Utilities) | 4347 | \$539   | \$21,552 | 24.0% | 1042 | \$539    | \$21,552  | 24.0%  | 1042 | \$539 | \$21,552 | 24.0% | 1042 |
| 116.01 | Baldwin | Summerdale     | Baldwin County Sewer Service, LLC- Summerdale                | 16   | \$720   | \$28,800 | 23.3% | 4    | \$720    | \$28,800  | 23.3%  | 4    | \$720 | \$28,800 | 23.3% | 4    |
| 116.01 | Baldwin | Elberta        | Baldwin County Sewer Service, LLC                            | 1155 | \$654   | \$26,160 | 18.9% | 219  | \$654    | \$26,160  | 18.9%  | 219  | \$654 | \$26,160 | 18.9% | 219  |
| 116.01 | Baldwin | Foley          | The Utilities Board of the City of Foley (Riviera Utilities) | 890  | \$539   | \$21,552 | 14.4% | 128  | \$539    | \$21,552  | 14.4%  | 128  | \$539 | \$21,552 | 14.4% | 128  |
| 116.01 | Baldwin | Perdido Beach  | Perdido Bay Water, Sewer & Fire Protection                   | 18   | \$506   | \$20,256 | 13.4% | 2    | \$506    | \$20,256  | 13.4%  | 2    | \$506 | \$20,256 | 13.4% | 2    |
| 116.01 | Baldwin | Orange Beach   | Orange Beach Sewer Department                                | 228  | \$336   | \$13,440 | 8.1%  | 18   | \$336    | \$13,440  | 8.1%   | 18   | \$336 | \$13,440 | 8.1%  | 18   |
| 116.02 | Baldwin | Unincorporated | OWTS                                                         | 2328 | \$530   | \$21,192 | 14.7% | 342  | \$5,000  | \$200,000 | 99.9%  | 2328 | \$100 | \$4,000  | 1.4%  | 32   |
| 116.02 | Baldwin | Perdido Beach  | Perdido Bay Water, Sewer & Fire Protection                   | 202  | \$506   | \$20,256 | 13.7% | 28   | \$506    | \$20,256  | 13.7%  | 28   | \$506 | \$20,256 | 13.7% | 28   |
| 9501   | Barbour | Unincorporated | OWTS                                                         | 89   | \$1,819 | \$72,778 | 69.2% | 62   | \$20,000 | \$800,000 | 99.9%  | 89   | \$100 | \$4,000  | 5.9%  | 5    |
| 9501   | Barbour | Eufaula        | The Water Works and Sewer Board of the City of Eufaula       | 1078 | \$416   | \$16,651 | 24.6% | 265  | \$416    | \$16,651  | 24.6%  | 265  | \$416 | \$16,651 | 24.6% | 265  |
| 9502   | Barbour | Clayton        | Town of Clayton Water and Sewer Board                        | 1049 | \$151   | \$6,038  | 8.3%  | 87   | \$151    | \$6,038   | 8.3%   | 87   | \$151 | \$6,038  | 8.3%  | 87   |
| 9503   | Barbour | Unincorporated | OWTS                                                         | 456  | \$1,819 | \$72,778 | 83.0% | 379  | \$20,000 | \$800,000 | 99.9%  | 456  | \$100 | \$4,000  | 7.6%  | 35   |
| 9503   | Barbour | Louisville     | Town of Louisville                                           | 161  | \$216   | \$8,640  | 16.5% | 27   | \$216    | \$8,640   | 16.5%  | 27   | \$216 | \$8,640  | 16.5% | 27   |
| 9504   | Barbour | Unincorporated | OWTS                                                         | 520  | \$1,819 | \$72,778 | 89.2% | 464  | \$20,000 | \$800,000 | 100.0% | 520  | \$100 | \$4,000  | 5.6%  | 29   |
| 9504   | Barbour | Blue Springs   | OWTS                                                         | 25   | \$1,819 | \$72,776 | 89.2% | 22   | \$20,000 | \$800,000 | 100.0% | 25   | \$100 | \$4,000  | 5.6%  | 1    |
| 9504   | Barbour | Clio           | City of Clio                                                 | 588  | \$240   | \$9,600  | 13.3% | 78   | \$240    | \$9,600   | 13.3%  | 78   | \$240 | \$9,600  | 13.3% | 78   |
| 9505   | Barbour | Unincorporated | OWTS                                                         | 1112 | \$1,819 | \$72,778 | 72.7% | 808  | \$20,000 | \$800,000 | 99.9%  | 1112 | \$100 | \$4,000  | 3.0%  | 33   |
| 9505   | Barbour | Bakerhill      | OWTS                                                         | 29   | \$1,819 | \$72,776 | 72.7% | 21   | \$20,000 | \$800,000 | 99.9%  | 29   | \$100 | \$4,000  | 3.0%  | 1    |
| 9505   | Barbour | Eufaula        | The Water Works and Sewer Board of the City of Eufaula       | 235  | \$416   | \$16,651 | 16.2% | 38   | \$416    | \$16,651  | 16.2%  | 38   | \$416 | \$16,651 | 16.2% | 38   |
| 9506   | Barbour | Unincorporated | OWTS                                                         | 168  | \$1,819 | \$72,778 | 80.5% | 135  | \$20,000 | \$800,000 | 100.0% | 168  | \$100 | \$4,000  | 5.8%  | 10   |
| 9506   | Barbour | Eufaula        | The Water Works and Sewer Board of the City of Eufaula       | 558  | \$416   | \$16,651 | 30.2% | 169  | \$416    | \$16,651  | 30.2%  | 169  | \$416 | \$16,651 | 30.2% | 169  |
| 9507   | Barbour | Unincorporated | OWTS                                                         | 374  | \$1,819 | \$72,778 | 81.7% | 305  | \$20,000 | \$800,000 | 100.0% | 374  | \$100 | \$4,000  | 6.3%  | 23   |
| 9507   | Barbour | Eufaula        | The Water Works and Sewer Board of the City of Eufaula       | 213  | \$416   | \$16,651 | 31.4% | 67   | \$416    | \$16,651  | 31.4%  | 67   | \$416 | \$16,651 | 31.4% | 67   |
| 9508   | Barbour | Unincorporated | OWTS                                                         | 59   | \$1,819 | \$72,778 | 76.0% | 45   | \$20,000 | \$800,000 | 100.0% | 59   | \$100 | \$4,000  | 5.4%  | 3    |

|        |         |                |                                                        |      |         |          |       |     |          |           |        |      |       |          |       |     |
|--------|---------|----------------|--------------------------------------------------------|------|---------|----------|-------|-----|----------|-----------|--------|------|-------|----------|-------|-----|
| 9508   | Barbour | Eufaula        | The Water Works and Sewer Board of the City of Eufaula | 1031 | \$416   | \$16,651 | 19.6% | 203 | \$416    | \$16,651  | 19.6%  | 203  | \$416 | \$16,651 | 19.6% | 203 |
| 9509   | Barbour | Unincorporated | OWTS                                                   | 10   | \$1,819 | \$72,778 | 82.2% | 8   | \$20,000 | \$800,000 | 100.0% | 10   | \$100 | \$4,000  | 8.8%  | 1   |
| 9509   | Barbour | Eufaula        | The Water Works and Sewer Board of the City of Eufaula | 1590 | \$416   | \$16,651 | 33.3% | 530 | \$416    | \$16,651  | 33.3%  | 530  | \$416 | \$16,651 | 33.3% | 530 |
| 100.01 | Bibb    | Unincorporated | OWTS                                                   | 491  | \$530   | \$21,192 | 22.0% | 108 | \$5,000  | \$200,000 | 100.0% | 491  | \$100 | \$4,000  | 2.3%  | 11  |
| 100.01 | Bibb    | West Blocton   | Town of West Blocton                                   | 170  | \$528   | \$21,120 | 21.9% | 37  | \$528    | \$21,120  | 21.9%  | 37   | \$528 | \$21,120 | 21.9% | 37  |
| 100.01 | Bibb    | Vance          | Town of Vance                                          | 41   | \$307   | \$12,288 | 8.4%  | 3   | \$307    | \$12,288  | 8.4%   | 3    | \$307 | \$12,288 | 8.4%  | 3   |
| 100.02 | Bibb    | Unincorporated | OWTS                                                   | 1605 | \$530   | \$21,192 | 23.6% | 379 | \$5,000  | \$200,000 | 100.0% | 1605 | \$100 | \$4,000  | 2.5%  | 40  |
| 100.02 | Bibb    | Woodstock      | OWTS                                                   | 124  | \$530   | \$21,194 | 23.6% | 29  | \$5,000  | \$200,000 | 100.0% | 124  | \$100 | \$4,000  | 2.5%  | 3   |
| 100.02 | Bibb    | West Blocton   | Town of West Blocton                                   | 191  | \$528   | \$21,120 | 23.5% | 45  | \$528    | \$21,120  | 23.5%  | 45   | \$528 | \$21,120 | 23.5% | 45  |
| 100.02 | Bibb    | Vance          | Town of Vance                                          | 16   | \$307   | \$12,288 | 10.6% | 2   | \$307    | \$12,288  | 10.6%  | 2    | \$307 | \$12,288 | 10.6% | 2   |
| 100.03 | Bibb    | Unincorporated | OWTS                                                   | 1255 | \$530   | \$21,192 | 16.0% | 200 | \$5,000  | \$200,000 | 100.0% | 1255 | \$100 | \$4,000  | 1.2%  | 16  |
| 100.03 | Bibb    | Centreville    | Centreville Water and Sewer                            | 453  | \$278   | \$11,131 | 4.8%  | 22  | \$278    | \$11,131  | 4.8%   | 22   | \$278 | \$11,131 | 4.8%  | 22  |
| 100.04 | Bibb    | Unincorporated | OWTS                                                   | 1157 | \$530   | \$21,192 | 31.3% | 362 | \$5,000  | \$200,000 | 99.9%  | 1157 | \$100 | \$4,000  | 5.6%  | 64  |
| 100.04 | Bibb    | Brent          | Brent Utilities Board                                  | 1067 | \$278   | \$11,131 | 15.8% | 168 | \$278    | \$11,131  | 15.8%  | 168  | \$278 | \$11,131 | 15.8% | 168 |
| 100.04 | Bibb    | Centreville    | Centreville Water and Sewer                            | 321  | \$278   | \$11,131 | 15.8% | 51  | \$278    | \$11,131  | 15.8%  | 51   | \$278 | \$11,131 | 15.8% | 51  |
| 501.01 | Blount  | Unincorporated | OWTS                                                   | 2068 | \$530   | \$21,192 | 19.8% | 410 | \$5,000  | \$200,000 | 100.0% | 2068 | \$100 | \$4,000  | 2.9%  | 60  |
| 501.01 | Blount  | Highland Lake  | OWTS                                                   | 64   | \$530   | \$21,194 | 19.8% | 13  | \$5,000  | \$200,000 | 100.0% | 64   | \$100 | \$4,000  | 2.9%  | 2   |
| 501.01 | Blount  | Allgood        | OWTS                                                   | 24   | \$530   | \$21,194 | 19.8% | 5   | \$5,000  | \$200,000 | 100.0% | 24   | \$100 | \$4,000  | 2.9%  | 1   |
| 501.01 | Blount  | Oneonta        | Utilities Board of the City of Oneonta                 | 624  | \$621   | \$24,850 | 23.8% | 149 | \$621    | \$24,850  | 23.8%  | 149  | \$621 | \$24,850 | 23.8% | 149 |
| 501.02 | Blount  | Unincorporated | OWTS                                                   | 674  | \$530   | \$21,192 | 25.8% | 174 | \$5,000  | \$200,000 | 100.0% | 674  | \$100 | \$4,000  | 3.4%  | 23  |
| 501.02 | Blount  | Rosa           | OWTS                                                   | 94   | \$530   | \$21,194 | 25.8% | 24  | \$5,000  | \$200,000 | 100.0% | 94   | \$100 | \$4,000  | 3.4%  | 3   |
| 501.02 | Blount  | Allgood        | OWTS                                                   | 11   | \$530   | \$21,194 | 25.8% | 3   | \$5,000  | \$200,000 | 100.0% | 11   | \$100 | \$4,000  | 3.4%  | 0   |
| 501.02 | Blount  | Oneonta        | Utilities Board of the City of Oneonta                 | 1996 | \$621   | \$24,850 | 32.2% | 644 | \$621    | \$24,850  | 32.2%  | 644  | \$621 | \$24,850 | 32.2% | 644 |
| 502    | Blount  | Unincorporated | OWTS                                                   | 872  | \$530   | \$21,192 | 14.8% | 129 | \$5,000  | \$200,000 | 100.0% | 872  | \$100 | \$4,000  | 1.8%  | 16  |
| 502    | Blount  | Rosa           | OWTS                                                   | 42   | \$530   | \$21,194 | 14.8% | 6   | \$5,000  | \$200,000 | 100.0% | 42   | \$100 | \$4,000  | 1.8%  | 1   |
| 502    | Blount  | Cleveland      | Town of Cleveland                                      | 510  | \$694   | \$27,773 | 21.5% | 110 | \$694    | \$27,773  | 21.5%  | 110  | \$694 | \$27,773 | 21.5% | 110 |
| 503    | Blount  | Unincorporated | OWTS                                                   | 1549 | \$530   | \$21,192 | 28.6% | 443 | \$5,000  | \$200,000 | 100.0% | 1549 | \$100 | \$4,000  | 6.5%  | 100 |
| 503    | Blount  | Susan Moore    | OWTS                                                   | 140  | \$530   | \$21,194 | 28.6% | 40  | \$5,000  | \$200,000 | 100.0% | 140  | \$100 | \$4,000  | 6.5%  | 9   |
| 503    | Blount  | Altoona        | Altoona Water Works Board                              | 41   | \$387   | \$15,480 | 21.8% | 9   | \$387    | \$15,480  | 21.8%  | 9    | \$387 | \$15,480 | 21.8% | 9   |
| 503    | Blount  | Snead          | Town of Snead                                          | 293  | \$271   | \$10,848 | 17.0% | 50  | \$271    | \$10,848  | 17.0%  | 50   | \$271 | \$10,848 | 17.0% | 50  |
| 504    | Blount  | Unincorporated | OWTS                                                   | 1510 | \$530   | \$21,192 | 20.4% | 308 | \$5,000  | \$200,000 | 100.0% | 1510 | \$100 | \$4,000  | 4.5%  | 68  |
| 504    | Blount  | Susan Moore    | OWTS                                                   | 3    | \$530   | \$21,194 | 20.4% | 1   | \$5,000  | \$200,000 | 100.0% | 3    | \$100 | \$4,000  | 4.5%  | 0   |
| 504    | Blount  | Blountsville   | Blountsville Utility Board                             | 20   | \$481   | \$19,248 | 18.4% | 4   | \$481    | \$19,248  | 18.4%  | 4    | \$481 | \$19,248 | 18.4% | 4   |

|        |         |                |                                                       |      |         |          |       |     |          |           |        |      |       |          |       |     |
|--------|---------|----------------|-------------------------------------------------------|------|---------|----------|-------|-----|----------|-----------|--------|------|-------|----------|-------|-----|
| 505    | Blount  | Unincorporated | OWTS                                                  | 1805 | \$530   | \$21,192 | 18.9% | 340 | \$5,000  | \$200,000 | 100.0% | 1805 | \$100 | \$4,000  | 3.0%  | 53  |
| 505    | Blount  | Nectar         | OWTS                                                  | 47   | \$530   | \$21,194 | 18.9% | 9   | \$5,000  | \$200,000 | 100.0% | 47   | \$100 | \$4,000  | 3.0%  | 1   |
| 505    | Blount  | Hayden         | West Blount Sewer System                              | 2    | \$744   | \$29,760 | 28.6% | 1   | \$744    | \$29,760  | 28.6%  | 1    | \$744 | \$29,760 | 28.6% | 1   |
| 505    | Blount  | Blountsville   | Blountsville Utility Board                            | 649  | \$481   | \$19,248 | 17.2% | 112 | \$481    | \$19,248  | 17.2%  | 112  | \$481 | \$19,248 | 17.2% | 112 |
| 506.01 | Blount  | Unincorporated | OWTS                                                  | 1359 | \$530   | \$21,192 | 14.3% | 194 | \$5,000  | \$200,000 | 100.0% | 1359 | \$100 | \$4,000  | 2.4%  | 33  |
| 506.01 | Blount  | Hayden         | West Blount Sewer System                              | 42   | \$744   | \$29,760 | 23.4% | 10  | \$744    | \$29,760  | 23.4%  | 10   | \$744 | \$29,760 | 23.4% | 10  |
| 506.02 | Blount  | Unincorporated | OWTS                                                  | 2601 | \$530   | \$21,192 | 10.4% | 271 | \$5,000  | \$200,000 | 99.9%  | 2601 | \$100 | \$4,000  | 1.5%  | 40  |
| 506.02 | Blount  | Hayden         | West Blount Sewer System                              | 740  | \$744   | \$29,760 | 18.0% | 133 | \$744    | \$29,760  | 18.0%  | 133  | \$744 | \$29,760 | 18.0% | 133 |
| 507    | Blount  | Unincorporated | OWTS                                                  | 2879 | \$530   | \$21,192 | 26.8% | 771 | \$5,000  | \$200,000 | 99.9%  | 2879 | \$100 | \$4,000  | 4.0%  | 116 |
| 507    | Blount  | Locust Fork    | OWTS                                                  | 150  | \$530   | \$21,194 | 26.8% | 40  | \$5,000  | \$200,000 | 99.9%  | 150  | \$100 | \$4,000  | 4.0%  | 6   |
| 507    | Blount  | County Line    | OWTS                                                  | 27   | \$530   | \$21,194 | 26.8% | 7   | \$5,000  | \$200,000 | 99.9%  | 27   | \$100 | \$4,000  | 4.0%  | 1   |
| 507    | Blount  | Trafford       | OWTS                                                  | 2    | \$530   | \$21,194 | 26.8% | 0   | \$5,000  | \$200,000 | 99.9%  | 2    | \$100 | \$4,000  | 4.0%  | 0   |
| 507    | Blount  | Oneonta        | Utilities Board of the City of Oneonta                | 7    | \$621   | \$24,850 | 31.1% | 2   | \$621    | \$24,850  | 31.1%  | 2    | \$621 | \$24,850 | 31.1% | 2   |
| 9521   | Bullock | Unincorporated | OWTS                                                  | 408  | \$1,819 | \$72,778 | 86.3% | 352 | \$20,000 | \$800,000 | 99.9%  | 408  | \$100 | \$4,000  | 7.8%  | 32  |
| 9521   | Bullock | Midway         | Town of Midway                                        | 196  | \$413   | \$16,536 | 31.4% | 62  | \$413    | \$16,536  | 31.4%  | 62   | \$413 | \$16,536 | 31.4% | 62  |
| 9522   | Bullock | Unincorporated | OWTS                                                  | 17   | \$1,819 | \$72,778 | 82.6% | 14  | \$20,000 | \$800,000 | 100.0% | 17   | \$100 | \$4,000  | 8.0%  | 1   |
| 9522   | Bullock | Union Springs  | Union Springs Utilities Board                         | 1882 | \$217   | \$8,669  | 17.4% | 328 | \$217    | \$8,669   | 17.4%  | 328  | \$217 | \$8,669  | 17.4% | 328 |
| 9525   | Bullock | Unincorporated | OWTS                                                  | 1018 | \$1,819 | \$72,778 | 65.7% | 669 | \$20,000 | \$800,000 | 99.9%  | 1018 | \$100 | \$4,000  | 1.9%  | 19  |
| 9527   | Butler  | Unincorporated | OWTS                                                  | 634  | \$1,819 | \$72,778 | 69.8% | 442 | \$20,000 | \$800,000 | 100.0% | 634  | \$100 | \$4,000  | 5.8%  | 37  |
| 9527   | Butler  | Greenville     | Water Works and Sewer Board of the City of Greenville | 96   | \$448   | \$17,914 | 24.5% | 24  | \$448    | \$17,914  | 24.5%  | 24   | \$448 | \$17,914 | 24.5% | 24  |
| 9528   | Butler  | Greenville     | Water Works and Sewer Board of the City of Greenville | 480  | \$448   | \$17,914 | 15.6% | 75  | \$448    | \$17,914  | 15.6%  | 75   | \$448 | \$17,914 | 15.6% | 75  |
| 9529   | Butler  | Unincorporated | OWTS                                                  | 436  | \$1,819 | \$72,778 | 76.0% | 331 | \$20,000 | \$800,000 | 99.9%  | 436  | \$100 | \$4,000  | 3.4%  | 15  |
| 9529   | Butler  | Greenville     | Water Works and Sewer Board of the City of Greenville | 235  | \$448   | \$17,914 | 20.1% | 47  | \$448    | \$17,914  | 20.1%  | 47   | \$448 | \$17,914 | 20.1% | 47  |
| 9530   | Butler  | Unincorporated | OWTS                                                  | 482  | \$1,819 | \$72,778 | 67.0% | 323 | \$20,000 | \$800,000 | 100.0% | 482  | \$100 | \$4,000  | 4.6%  | 22  |
| 9530   | Butler  | Greenville     | Water Works and Sewer Board of the City of Greenville | 67   | \$448   | \$17,914 | 17.9% | 12  | \$448    | \$17,914  | 17.9%  | 12   | \$448 | \$17,914 | 17.9% | 12  |
| 9531   | Butler  | Unincorporated | OWTS                                                  | 721  | \$1,819 | \$72,778 | 86.4% | 623 | \$20,000 | \$800,000 | 100.0% | 721  | \$100 | \$4,000  | 4.0%  | 29  |
| 9531   | Butler  | Greenville     | Water Works and Sewer Board of the City of Greenville | 134  | \$448   | \$17,914 | 28.6% | 38  | \$448    | \$17,914  | 28.6%  | 38   | \$448 | \$17,914 | 28.6% | 38  |

|      |         |                |                                                        |      |         |          |       |     |          |           |        |      |       |          |       |     |
|------|---------|----------------|--------------------------------------------------------|------|---------|----------|-------|-----|----------|-----------|--------|------|-------|----------|-------|-----|
| 9532 | Butler  | Unincorporated | OWTS                                                   | 1141 | \$1,819 | \$72,778 | 70.8% | 807 | \$20,000 | \$800,000 | 100.0% | 1141 | \$100 | \$4,000  | 2.4%  | 27  |
| 9532 | Butler  | Greenville     | Water Works and Sewer Board of the City of Greenville  | 86   | \$448   | \$17,914 | 15.6% | 13  | \$448    | \$17,914  | 15.6%  | 13   | \$448 | \$17,914 | 15.6% | 13  |
| 9533 | Butler  | Unincorporated | OWTS                                                   | 642  | \$1,819 | \$72,778 | 71.0% | 456 | \$20,000 | \$800,000 | 100.0% | 642  | \$100 | \$4,000  | 3.4%  | 22  |
| 9533 | Butler  | Georgiana      | The Water Works & Sewer Board of the City of Georgiana | 10   | \$444   | \$17,760 | 18.1% | 2   | \$444    | \$17,760  | 18.1%  | 2    | \$444 | \$17,760 | 18.1% | 2   |
| 9534 | Butler  | Unincorporated | OWTS                                                   | 165  | \$1,819 | \$72,778 | 72.7% | 120 | \$20,000 | \$800,000 | 100.0% | 165  | \$100 | \$4,000  | 3.5%  | 6   |
| 9534 | Butler  | McKenzie       | OWTS                                                   | 6    | \$1,819 | \$72,776 | 72.7% | 5   | \$20,000 | \$800,000 | 100.0% | 6    | \$100 | \$4,000  | 3.5%  | 0   |
| 9534 | Butler  | Georgiana      | The Water Works & Sewer Board of the City of Georgiana | 657  | \$444   | \$17,760 | 26.3% | 173 | \$444    | \$17,760  | 26.3%  | 173  | \$444 | \$17,760 | 26.3% | 173 |
| 9535 | Butler  | Unincorporated | OWTS                                                   | 501  | \$1,819 | \$72,778 | 76.8% | 385 | \$20,000 | \$800,000 | 100.0% | 501  | \$100 | \$4,000  | 4.4%  | 22  |
| 9535 | Butler  | McKenzie       | OWTS                                                   | 13   | \$1,819 | \$72,776 | 76.8% | 10  | \$20,000 | \$800,000 | 100.0% | 13   | \$100 | \$4,000  | 4.4%  | 1   |
| 2    | Calhoun | Anniston       | The Water Works & Sewer Board of the City of Anniston  | 1181 | \$296   | \$11,846 | 12.6% | 149 | \$296    | \$11,846  | 12.6%  | 149  | \$296 | \$11,846 | 12.6% | 149 |
| 3    | Calhoun | Unincorporated | OWTS                                                   | 37   | \$530   | \$21,192 | 48.5% | 18  | \$5,000  | \$200,000 | 100.0% | 37   | \$100 | \$4,000  | 6.0%  | 2   |
| 3    | Calhoun | Anniston       | The Water Works & Sewer Board of the City of Anniston  | 1216 | \$296   | \$11,846 | 22.2% | 270 | \$296    | \$11,846  | 22.2%  | 270  | \$296 | \$11,846 | 22.2% | 270 |
| 4    | Calhoun | Unincorporated | OWTS                                                   | 748  | \$530   | \$21,192 | 45.5% | 340 | \$5,000  | \$200,000 | 99.9%  | 748  | \$100 | \$4,000  | 5.6%  | 42  |
| 4    | Calhoun | Anniston       | The Water Works & Sewer Board of the City of Anniston  | 311  | \$296   | \$11,846 | 21.4% | 67  | \$296    | \$11,846  | 21.4%  | 67   | \$296 | \$11,846 | 21.4% | 67  |
| 5    | Calhoun | Unincorporated | OWTS                                                   | 228  | \$530   | \$21,192 | 49.4% | 113 | \$5,000  | \$200,000 | 99.9%  | 228  | \$100 | \$4,000  | 9.9%  | 23  |
| 5    | Calhoun | Anniston       | The Water Works & Sewer Board of the City of Anniston  | 267  | \$296   | \$11,846 | 29.6% | 79  | \$296    | \$11,846  | 29.6%  | 79   | \$296 | \$11,846 | 29.6% | 79  |
| 6    | Calhoun | Unincorporated | OWTS                                                   | 266  | \$530   | \$21,192 | 55.1% | 146 | \$5,000  | \$200,000 | 99.9%  | 266  | \$100 | \$4,000  | 15.6% | 41  |
| 6    | Calhoun | Anniston       | The Water Works & Sewer Board of the City of Anniston  | 439  | \$296   | \$11,846 | 42.4% | 186 | \$296    | \$11,846  | 42.4%  | 186  | \$296 | \$11,846 | 42.4% | 186 |
| 7    | Calhoun | Unincorporated | OWTS                                                   | 612  | \$530   | \$21,192 | 30.1% | 184 | \$5,000  | \$200,000 | 100.0% | 612  | \$100 | \$4,000  | 5.2%  | 32  |
| 7    | Calhoun | Anniston       | The Water Works & Sewer Board of the City of Anniston  | 550  | \$296   | \$11,846 | 14.9% | 82  | \$296    | \$11,846  | 14.9%  | 82   | \$296 | \$11,846 | 14.9% | 82  |
| 8    | Calhoun | Anniston       | The Water Works & Sewer Board of the City of Anniston  | 423  | \$296   | \$11,846 | 18.5% | 78  | \$296    | \$11,846  | 18.5%  | 78   | \$296 | \$11,846 | 18.5% | 78  |
| 9    | Calhoun | Unincorporated | OWTS                                                   | 740  | \$530   | \$21,192 | 20.3% | 150 | \$5,000  | \$200,000 | 99.9%  | 740  | \$100 | \$4,000  | 2.0%  | 15  |

|       |         |                |                                                       |      |       |          |       |     |         |           |        |      |       |          |       |    |
|-------|---------|----------------|-------------------------------------------------------|------|-------|----------|-------|-----|---------|-----------|--------|------|-------|----------|-------|----|
| 9     | Calhoun | Anniston       | The Water Works & Sewer Board of the City of Anniston | 788  | \$296 | \$11,846 | 8.1%  | 64  | \$296   | \$11,846  | 8.1%   | 64   | \$296 | \$11,846 | 8.1%  | 64 |
| 10    | Calhoun | Unincorporated | OWTS                                                  | 1272 | \$530 | \$21,192 | 14.8% | 188 | \$5,000 | \$200,000 | 100.0% | 1272 | \$100 | \$4,000  | 2.0%  | 25 |
| 10    | Calhoun | Anniston       | The Water Works & Sewer Board of the City of Anniston | 974  | \$296 | \$11,846 | 5.4%  | 52  | \$296   | \$11,846  | 5.4%   | 52   | \$296 | \$11,846 | 5.4%  | 52 |
| 10    | Calhoun | Oxford         | Water Works & Sewer Board of the City of Oxford       | 248  | \$204 | \$8,150  | 4.0%  | 10  | \$204   | \$8,150   | 4.0%   | 10   | \$204 | \$8,150  | 4.0%  | 10 |
| 11    | Calhoun | Unincorporated | OWTS                                                  | 1570 | \$530 | \$21,192 | 10.9% | 171 | \$5,000 | \$200,000 | 100.0% | 1570 | \$100 | \$4,000  | 1.1%  | 17 |
| 11    | Calhoun | Anniston       | The Water Works & Sewer Board of the City of Anniston | 64   | \$296 | \$11,846 | 3.4%  | 2   | \$296   | \$11,846  | 3.4%   | 2    | \$296 | \$11,846 | 3.4%  | 2  |
| 11    | Calhoun | Oxford         | Water Works & Sewer Board of the City of Oxford       | 1176 | \$204 | \$8,150  | 2.2%  | 26  | \$204   | \$8,150   | 2.2%   | 26   | \$204 | \$8,150  | 2.2%  | 26 |
| 12.01 | Calhoun | Unincorporated | OWTS                                                  | 465  | \$530 | \$21,192 | 27.5% | 128 | \$5,000 | \$200,000 | 100.0% | 465  | \$100 | \$4,000  | 4.1%  | 19 |
| 12.01 | Calhoun | Hobson City    | The Water Works & Sewer Board of the City of Anniston | 87   | \$296 | \$11,846 | 12.8% | 11  | \$296   | \$11,846  | 12.8%  | 11   | \$296 | \$11,846 | 12.8% | 11 |
| 12.01 | Calhoun | Oxford         | Water Works & Sewer Board of the City of Oxford       | 596  | \$204 | \$8,150  | 8.3%  | 50  | \$204   | \$8,150   | 8.3%   | 50   | \$204 | \$8,150  | 8.3%  | 50 |
| 12.02 | Calhoun | Unincorporated | OWTS                                                  | 403  | \$530 | \$21,192 | 20.5% | 83  | \$5,000 | \$200,000 | 99.8%  | 403  | \$100 | \$4,000  | 2.8%  | 11 |
| 12.02 | Calhoun | Anniston       | The Water Works & Sewer Board of the City of Anniston | 488  | \$296 | \$11,846 | 9.0%  | 44  | \$296   | \$11,846  | 9.0%   | 44   | \$296 | \$11,846 | 9.0%  | 44 |
| 12.02 | Calhoun | Hobson City    | The Water Works & Sewer Board of the City of Anniston | 70   | \$296 | \$11,846 | 9.0%  | 6   | \$296   | \$11,846  | 9.0%   | 6    | \$296 | \$11,846 | 9.0%  | 6  |
| 12.02 | Calhoun | Oxford         | Water Works & Sewer Board of the City of Oxford       | 559  | \$204 | \$8,150  | 5.7%  | 32  | \$204   | \$8,150   | 5.7%   | 32   | \$204 | \$8,150  | 5.7%  | 32 |
| 13    | Calhoun | Unincorporated | OWTS                                                  | 762  | \$530 | \$21,192 | 23.7% | 180 | \$5,000 | \$200,000 | 99.9%  | 762  | \$100 | \$4,000  | 2.2%  | 16 |
| 14    | Calhoun | Unincorporated | OWTS                                                  | 1178 | \$530 | \$21,192 | 25.8% | 304 | \$5,000 | \$200,000 | 100.0% | 1178 | \$100 | \$4,000  | 5.9%  | 70 |
| 15    | Calhoun | Unincorporated | OWTS                                                  | 677  | \$530 | \$21,192 | 15.9% | 107 | \$5,000 | \$200,000 | 100.0% | 677  | \$100 | \$4,000  | 1.8%  | 12 |
| 15    | Calhoun | Anniston       | The Water Works & Sewer Board of the City of Anniston | 215  | \$296 | \$11,846 | 6.9%  | 15  | \$296   | \$11,846  | 6.9%   | 15   | \$296 | \$11,846 | 6.9%  | 15 |
| 15    | Calhoun | Oxford         | Water Works & Sewer Board of the City of Oxford       | 923  | \$204 | \$8,150  | 3.6%  | 33  | \$204   | \$8,150   | 3.6%   | 33   | \$204 | \$8,150  | 3.6%  | 33 |

|       |         |                |                                                       |      |       |          |       |     |         |           |        |      |       |          |       |     |
|-------|---------|----------------|-------------------------------------------------------|------|-------|----------|-------|-----|---------|-----------|--------|------|-------|----------|-------|-----|
| 16    | Calhoun | Unincorporated | OWTS                                                  | 1394 | \$530 | \$21,192 | 23.3% | 325 | \$5,000 | \$200,000 | 100.0% | 1394 | \$100 | \$4,000  | 1.3%  | 18  |
| 16    | Calhoun | Anniston       | The Water Works & Sewer Board of the City of Anniston | 23   | \$296 | \$11,846 | 6.5%  | 2   | \$296   | \$11,846  | 6.5%   | 2    | \$296 | \$11,846 | 6.5%  | 2   |
| 17    | Calhoun | Unincorporated | OWTS                                                  | 2470 | \$530 | \$21,192 | 18.9% | 466 | \$5,000 | \$200,000 | 100.0% | 2470 | \$100 | \$4,000  | 1.4%  | 34  |
| 17    | Calhoun | Anniston       | The Water Works & Sewer Board of the City of Anniston | 120  | \$296 | \$11,846 | 6.5%  | 8   | \$296   | \$11,846  | 6.5%   | 8    | \$296 | \$11,846 | 6.5%  | 8   |
| 18    | Calhoun | Unincorporated | OWTS                                                  | 1936 | \$530 | \$21,192 | 15.5% | 299 | \$5,000 | \$200,000 | 99.9%  | 1936 | \$100 | \$4,000  | 2.4%  | 46  |
| 18    | Calhoun | Weaver         | OWTS                                                  | 536  | \$530 | \$21,194 | 15.5% | 83  | \$5,000 | \$200,000 | 99.9%  | 536  | \$100 | \$4,000  | 2.4%  | 13  |
| 18    | Calhoun | Jacksonville   | Jacksonville Water Works, Gas and Sewer Board         | 16   | \$334 | \$13,363 | 9.0%  | 1   | \$334   | \$13,363  | 9.0%   | 1    | \$334 | \$13,363 | 9.0%  | 1   |
| 20    | Calhoun | Unincorporated | OWTS                                                  | 2418 | \$530 | \$21,192 | 14.0% | 340 | \$5,000 | \$200,000 | 100.0% | 2418 | \$100 | \$4,000  | 0.8%  | 19  |
| 20    | Calhoun | Jacksonville   | Jacksonville Water Works, Gas and Sewer Board         | 297  | \$334 | \$13,363 | 6.1%  | 18  | \$334   | \$13,363  | 6.1%   | 18   | \$334 | \$13,363 | 6.1%  | 18  |
| 20    | Calhoun | Oxford         | Water Works & Sewer Board of the City of Oxford       | 20   | \$204 | \$8,150  | 1.6%  | 0   | \$204   | \$8,150   | 1.6%   | 0    | \$204 | \$8,150  | 1.6%  | 0   |
| 21.01 | Calhoun | Unincorporated | OWTS                                                  | 177  | \$530 | \$21,192 | 44.8% | 80  | \$5,000 | \$200,000 | 99.9%  | 177  | \$100 | \$4,000  | 12.0% | 21  |
| 21.01 | Calhoun | Jacksonville   | Jacksonville Water Works, Gas and Sewer Board         | 720  | \$334 | \$13,363 | 33.4% | 240 | \$334   | \$13,363  | 33.4%  | 240  | \$334 | \$13,363 | 33.4% | 240 |
| 21.02 | Calhoun | Unincorporated | OWTS                                                  | 57   | \$530 | \$21,192 | 21.8% | 13  | \$5,000 | \$200,000 | 100.0% | 57   | \$100 | \$4,000  | 4.6%  | 3   |
| 21.02 | Calhoun | Jacksonville   | Jacksonville Water Works, Gas and Sewer Board         | 1255 | \$334 | \$13,363 | 14.6% | 183 | \$334   | \$13,363  | 14.6%  | 183  | \$334 | \$13,363 | 14.6% | 183 |
| 21.03 | Calhoun | Unincorporated | OWTS                                                  | 3    | \$530 | \$21,192 | 26.0% | 1   | \$5,000 | \$200,000 | 100.0% | 3    | \$100 | \$4,000  | 5.0%  | 0   |
| 21.03 | Calhoun | Jacksonville   | Jacksonville Water Works, Gas and Sewer Board         | 2674 | \$334 | \$13,363 | 16.2% | 432 | \$334   | \$13,363  | 16.2%  | 432  | \$334 | \$13,363 | 16.2% | 432 |
| 22    | Calhoun | Unincorporated | OWTS                                                  | 882  | \$530 | \$21,192 | 21.0% | 185 | \$5,000 | \$200,000 | 100.0% | 882  | \$100 | \$4,000  | 1.7%  | 15  |
| 22    | Calhoun | Piedmont       | Piedmont Water Works                                  | 561  | \$243 | \$9,720  | 4.2%  | 23  | \$243   | \$9,720   | 4.2%   | 23   | \$243 | \$9,720  | 4.2%  | 23  |
| 23    | Calhoun | Unincorporated | OWTS                                                  | 732  | \$530 | \$21,192 | 35.8% | 262 | \$5,000 | \$200,000 | 100.0% | 732  | \$100 | \$4,000  | 6.4%  | 47  |
| 23    | Calhoun | Piedmont       | Piedmont Water Works                                  | 762  | \$243 | \$9,720  | 15.6% | 119 | \$243   | \$9,720   | 15.6%  | 119  | \$243 | \$9,720  | 15.6% | 119 |
| 24    | Calhoun | Unincorporated | OWTS                                                  | 1850 | \$530 | \$21,192 | 16.0% | 297 | \$5,000 | \$200,000 | 100.0% | 1850 | \$100 | \$4,000  | 0.6%  | 11  |
| 25.01 | Calhoun | Unincorporated | OWTS                                                  | 2666 | \$530 | \$21,192 | 8.2%  | 220 | \$5,000 | \$200,000 | 99.9%  | 2666 | \$100 | \$4,000  | 1.1%  | 30  |
| 25.02 | Calhoun | Unincorporated | OWTS                                                  | 1686 | \$530 | \$21,192 | 16.5% | 279 | \$5,000 | \$200,000 | 100.0% | 1686 | \$100 | \$4,000  | 3.1%  | 52  |
| 25.02 | Calhoun | Southside      | Southside Water Works and Sewer Board                 | 8    | \$389 | \$15,542 | 12.9% | 1   | \$389   | \$15,542  | 12.9%  | 1    | \$389 | \$15,542 | 12.9% | 1   |
| 25.02 | Calhoun | Glencoe        | Glencoe Water Works Board                             | 34   | \$255 | \$10,214 | 7.9%  | 3   | \$255   | \$10,214  | 7.9%   | 3    | \$255 | \$10,214 | 7.9%  | 3   |

|      |          |                |                                                        |      |       |          |       |     |         |           |        |      |       |          |       |     |
|------|----------|----------------|--------------------------------------------------------|------|-------|----------|-------|-----|---------|-----------|--------|------|-------|----------|-------|-----|
| 26   | Calhoun  | Unincorporated | OWTS                                                   | 1626 | \$530 | \$21,192 | 17.7% | 288 | \$5,000 | \$200,000 | 100.0% | 1626 | \$100 | \$4,000  | 2.4%  | 40  |
| 26   | Calhoun  | Ohatchee       | OWTS                                                   | 146  | \$530 | \$21,194 | 17.7% | 26  | \$5,000 | \$200,000 | 100.0% | 146  | \$100 | \$4,000  | 2.4%  | 4   |
| 26   | Calhoun  | Southside      | Southside Water Works and Sewer Board                  | 3    | \$389 | \$15,542 | 13.1% | 0   | \$389   | \$15,542  | 13.1%  | 0    | \$389 | \$15,542 | 13.1% | 0   |
| 9538 | Chambers | Unincorporated | OWTS                                                   | 1361 | \$530 | \$21,192 | 19.4% | 263 | \$5,000 | \$200,000 | 100.0% | 1361 | \$100 | \$4,000  | 2.2%  | 29  |
| 9538 | Chambers | Fredonia       | OWTS                                                   | 86   | \$530 | \$21,194 | 19.4% | 17  | \$5,000 | \$200,000 | 100.0% | 86   | \$100 | \$4,000  | 2.2%  | 2   |
| 9538 | Chambers | Five Points    | OWTS                                                   | 7    | \$530 | \$21,194 | 19.4% | 1   | \$5,000 | \$200,000 | 100.0% | 7    | \$100 | \$4,000  | 2.2%  | 0   |
| 9539 | Chambers | Unincorporated | OWTS                                                   | 506  | \$530 | \$21,192 | 18.5% | 94  | \$5,000 | \$200,000 | 100.0% | 506  | \$100 | \$4,000  | 0.9%  | 4   |
| 9539 | Chambers | Lanett         | City of Lanett                                         | 810  | \$240 | \$9,610  | 2.1%  | 17  | \$240   | \$9,610   | 2.1%   | 17   | \$240 | \$9,610  | 2.1%  | 17  |
| 9540 | Chambers | Unincorporated | OWTS                                                   | 943  | \$530 | \$21,192 | 26.7% | 252 | \$5,000 | \$200,000 | 100.0% | 943  | \$100 | \$4,000  | 3.8%  | 36  |
| 9540 | Chambers | Waverly        | OWTS                                                   | 15   | \$530 | \$21,194 | 26.7% | 4   | \$5,000 | \$200,000 | 100.0% | 15   | \$100 | \$4,000  | 3.8%  | 1   |
| 9540 | Chambers | La Fayette     | City of LaFayette Water & Wastewater                   | 1373 | \$405 | \$16,195 | 17.6% | 241 | \$405   | \$16,195  | 17.6%  | 241  | \$405 | \$16,195 | 17.6% | 241 |
| 9542 | Chambers | Unincorporated | OWTS                                                   | 1172 | \$530 | \$21,192 | 23.6% | 276 | \$5,000 | \$200,000 | 100.0% | 1172 | \$100 | \$4,000  | 1.6%  | 19  |
| 9542 | Chambers | Lanett         | City of Lanett                                         | 105  | \$240 | \$9,610  | 3.8%  | 4   | \$240   | \$9,610   | 3.8%   | 4    | \$240 | \$9,610  | 3.8%  | 4   |
| 9543 | Chambers | Unincorporated | OWTS                                                   | 586  | \$530 | \$21,192 | 17.4% | 102 | \$5,000 | \$200,000 | 99.8%  | 586  | \$100 | \$4,000  | 2.1%  | 12  |
| 9543 | Chambers | Cusseta        | OWTS                                                   | 116  | \$530 | \$21,194 | 17.4% | 20  | \$5,000 | \$200,000 | 99.8%  | 116  | \$100 | \$4,000  | 2.1%  | 2   |
| 9543 | Chambers | Valley         | East Alabama Water, Sewer and Fire Protection District | 1230 | \$498 | \$19,920 | 16.2% | 200 | \$498   | \$19,920  | 16.2%  | 200  | \$498 | \$19,920 | 16.2% | 200 |
| 9543 | Chambers | Lanett         | City of Lanett                                         | 344  | \$240 | \$9,610  | 5.1%  | 18  | \$240   | \$9,610   | 5.1%   | 18   | \$240 | \$9,610  | 5.1%  | 18  |
| 9544 | Chambers | Unincorporated | OWTS                                                   | 88   | \$530 | \$21,192 | 38.4% | 34  | \$5,000 | \$200,000 | 99.9%  | 88   | \$100 | \$4,000  | 6.5%  | 6   |
| 9544 | Chambers | Lanett         | City of Lanett                                         | 382  | \$240 | \$9,610  | 15.6% | 59  | \$240   | \$9,610   | 15.6%  | 59   | \$240 | \$9,610  | 15.6% | 59  |
| 9545 | Chambers | Unincorporated | OWTS                                                   | 742  | \$530 | \$21,192 | 37.4% | 278 | \$5,000 | \$200,000 | 100.0% | 742  | \$100 | \$4,000  | 6.3%  | 47  |
| 9545 | Chambers | Lanett         | City of Lanett                                         | 805  | \$240 | \$9,610  | 15.2% | 122 | \$240   | \$9,610   | 15.2%  | 122  | \$240 | \$9,610  | 15.2% | 122 |
| 9546 | Chambers | Valley         | East Alabama Water, Sewer and Fire Protection District | 1227 | \$498 | \$19,920 | 19.9% | 244 | \$498   | \$19,920  | 19.9%  | 244  | \$498 | \$19,920 | 19.9% | 244 |
| 9547 | Chambers | Unincorporated | OWTS                                                   | 86   | \$530 | \$21,192 | 21.8% | 19  | \$5,000 | \$200,000 | 100.0% | 86   | \$100 | \$4,000  | 2.7%  | 2   |
| 9547 | Chambers | Valley         | East Alabama Water, Sewer and Fire Protection District | 1464 | \$498 | \$19,920 | 20.4% | 299 | \$498   | \$19,920  | 20.4%  | 299  | \$498 | \$19,920 | 20.4% | 299 |
| 9557 | Cherokee | Unincorporated | OWTS                                                   | 546  | \$530 | \$21,192 | 22.7% | 124 | \$5,000 | \$200,000 | 100.0% | 546  | \$100 | \$4,000  | 1.8%  | 10  |
| 9557 | Cherokee | Cedar Bluff    | The Utilities Board of the Town of Cedar Bluff         | 858  | \$405 | \$16,210 | 13.4% | 115 | \$405   | \$16,210  | 13.4%  | 115  | \$405 | \$16,210 | 13.4% | 115 |
| 9557 | Cherokee | Unincorporated | OWTS                                                   | 1381 | \$530 | \$21,192 | 30.4% | 420 | \$5,000 | \$200,000 | 99.9%  | 1381 | \$100 | \$4,000  | 4.1%  | 56  |
| 9557 | Cherokee | Gaylesville    | OWTS                                                   | 4    | \$530 | \$21,194 | 30.4% | 1   | \$5,000 | \$200,000 | 99.9%  | 4    | \$100 | \$4,000  | 4.1%  | 0   |
| 9557 | Cherokee | Cedar Bluff    | The Utilities Board of the Town of Cedar Bluff         | 59   | \$405 | \$16,210 | 21.9% | 13  | \$405   | \$16,210  | 21.9%  | 13   | \$405 | \$16,210 | 21.9% | 13  |
| 9558 | Cherokee | Unincorporated | OWTS                                                   | 1974 | \$530 | \$21,192 | 20.1% | 397 | \$5,000 | \$200,000 | 100.0% | 1974 | \$100 | \$4,000  | 2.5%  | 50  |
| 9558 | Cherokee | Sand Rock      | OWTS                                                   | 87   | \$530 | \$21,194 | 20.1% | 18  | \$5,000 | \$200,000 | 100.0% | 87   | \$100 | \$4,000  | 2.5%  | 2   |
| 9558 | Cherokee | Leesburg       | Cherokee County Water and Sewer Authority              | 95   | \$354 | \$14,141 | 10.8% | 10  | \$354   | \$14,141  | 10.8%  | 10   | \$354 | \$14,141 | 10.8% | 10  |

|        |          |                |                                                 |      |         |          |       |     |          |           |        |      |       |          |       |     |
|--------|----------|----------------|-------------------------------------------------|------|---------|----------|-------|-----|----------|-----------|--------|------|-------|----------|-------|-----|
| 9559   | Cherokee | Unincorporated | OWTS                                            | 932  | \$530   | \$21,192 | 29.7% | 277 | \$5,000  | \$200,000 | 100.0% | 932  | \$100 | \$4,000  | 4.0%  | 38  |
| 9559   | Cherokee | Centre         | Water Works & Sewer Board of the Town of Centre | 697  | \$419   | \$16,747 | 23.2% | 162 | \$419    | \$16,747  | 23.2%  | 162  | \$419 | \$16,747 | 23.2% | 162 |
| 9559   | Cherokee | Piedmont       | Piedmont Water Works                            | 3    | \$243   | \$9,720  | 9.8%  | 0   | \$243    | \$9,720   | 9.8%   | 0    | \$243 | \$9,720  | 9.8%  | 0   |
| 9560   | Cherokee | Unincorporated | OWTS                                            | 575  | \$530   | \$21,192 | 22.8% | 131 | \$5,000  | \$200,000 | 99.9%  | 575  | \$100 | \$4,000  | 2.9%  | 17  |
| 9560   | Cherokee | Centre         | Water Works & Sewer Board of the Town of Centre | 1263 | \$419   | \$16,747 | 13.2% | 167 | \$419    | \$16,747  | 13.2%  | 167  | \$419 | \$16,747 | 13.2% | 167 |
| 9560   | Cherokee | Cedar Bluff    | The Utilities Board of the Town of Cedar Bluff  | 5    | \$405   | \$16,210 | 12.0% | 1   | \$405    | \$16,210  | 12.0%  | 1    | \$405 | \$16,210 | 12.0% | 1   |
| 9561   | Cherokee | Unincorporated | OWTS                                            | 2258 | \$530   | \$21,192 | 21.7% | 491 | \$5,000  | \$200,000 | 99.9%  | 2258 | \$100 | \$4,000  | 1.8%  | 40  |
| 601.01 | Chilton  | Unincorporated | OWTS                                            | 903  | \$530   | \$21,192 | 21.9% | 198 | \$5,000  | \$200,000 | 100.0% | 903  | \$100 | \$4,000  | 2.6%  | 24  |
| 601.01 | Chilton  | Clanton        | Clanton Water Works and Sewer Board             | 1053 | \$267   | \$10,680 | 7.2%  | 76  | \$267    | \$10,680  | 7.2%   | 76   | \$267 | \$10,680 | 7.2%  | 76  |
| 601.02 | Chilton  | Unincorporated | OWTS                                            | 1527 | \$530   | \$21,192 | 23.6% | 361 | \$5,000  | \$200,000 | 99.9%  | 1527 | \$100 | \$4,000  | 3.6%  | 54  |
| 601.02 | Chilton  | Clanton        | Clanton Water Works and Sewer Board             | 1044 | \$267   | \$10,680 | 10.0% | 105 | \$267    | \$10,680  | 10.0%  | 105  | \$267 | \$10,680 | 10.0% | 105 |
| 602    | Chilton  | Unincorporated | OWTS                                            | 929  | \$530   | \$21,192 | 17.5% | 163 | \$5,000  | \$200,000 | 100.0% | 929  | \$100 | \$4,000  | 2.6%  | 25  |
| 602    | Chilton  | Clanton        | Clanton Water Works and Sewer Board             | 218  | \$267   | \$10,680 | 7.3%  | 16  | \$267    | \$10,680  | 7.3%   | 16   | \$267 | \$10,680 | 7.3%  | 16  |
| 603    | Chilton  | Unincorporated | OWTS                                            | 1409 | \$530   | \$21,192 | 21.9% | 309 | \$5,000  | \$200,000 | 100.0% | 1409 | \$100 | \$4,000  | 3.9%  | 55  |
| 603    | Chilton  | Jemison        | Living Water Utilities, LLC-Jemison             | 8    | \$389   | \$15,552 | 13.7% | 1   | \$389    | \$15,552  | 13.7%  | 1    | \$389 | \$15,552 | 13.7% | 1   |
| 604.01 | Chilton  | Unincorporated | OWTS                                            | 1289 | \$530   | \$21,192 | 25.0% | 323 | \$5,000  | \$200,000 | 99.9%  | 1289 | \$100 | \$4,000  | 4.0%  | 52  |
| 604.01 | Chilton  | Jemison        | Living Water Utilities, LLC-Jemison             | 152  | \$389   | \$15,552 | 18.9% | 29  | \$389    | \$15,552  | 18.9%  | 29   | \$389 | \$15,552 | 18.9% | 29  |
| 604.01 | Chilton  | Thorsby        | Town of Thorsby                                 | 471  | \$226   | \$9,053  | 9.1%  | 43  | \$226    | \$9,053   | 9.1%   | 43   | \$226 | \$9,053  | 9.1%  | 43  |
| 604.02 | Chilton  | Unincorporated | OWTS                                            | 2998 | \$530   | \$21,192 | 23.7% | 709 | \$5,000  | \$200,000 | 100.0% | 2998 | \$100 | \$4,000  | 3.4%  | 103 |
| 604.02 | Chilton  | Calera         | City of Calera                                  | 55   | \$545   | \$21,792 | 24.4% | 13  | \$545    | \$21,792  | 24.4%  | 13   | \$545 | \$21,792 | 24.4% | 13  |
| 604.02 | Chilton  | Jemison        | Living Water Utilities, LLC-Jemison             | 271  | \$389   | \$15,552 | 16.8% | 45  | \$389    | \$15,552  | 16.8%  | 45   | \$389 | \$15,552 | 16.8% | 45  |
| 605    | Chilton  | Unincorporated | OWTS                                            | 1042 | \$530   | \$21,192 | 25.2% | 262 | \$5,000  | \$200,000 | 100.0% | 1042 | \$100 | \$4,000  | 5.0%  | 52  |
| 605    | Chilton  | Maplesville    | Maplesville Utility Board                       | 176  | \$708   | \$28,325 | 33.0% | 58  | \$708    | \$28,325  | 33.0%  | 58   | \$708 | \$28,325 | 33.0% | 58  |
| 606    | Chilton  | Unincorporated | OWTS                                            | 1312 | \$530   | \$21,192 | 24.5% | 321 | \$5,000  | \$200,000 | 100.0% | 1312 | \$100 | \$4,000  | 3.3%  | 44  |
| 607    | Chilton  | Unincorporated | OWTS                                            | 1993 | \$530   | \$21,192 | 22.1% | 441 | \$5,000  | \$200,000 | 100.0% | 1993 | \$100 | \$4,000  | 2.2%  | 43  |
| 607    | Chilton  | Clanton        | Clanton Water Works and Sewer Board             | 77   | \$267   | \$10,680 | 6.6%  | 5   | \$267    | \$10,680  | 6.6%   | 5    | \$267 | \$10,680 | 6.6%  | 5   |
| 9567   | Choctaw  | Unincorporated | OWTS                                            | 1030 | \$1,819 | \$72,778 | 78.1% | 805 | \$20,000 | \$800,000 | 100.0% | 1030 | \$100 | \$4,000  | 4.6%  | 47  |
| 9567   | Choctaw  | Lisman         | North Choctaw Water and Sewer Authority         | 227  | \$560   | \$22,387 | 34.8% | 79  | \$560    | \$22,387  | 34.8%  | 79   | \$560 | \$22,387 | 34.8% | 79  |



|      |         |                |                                                   |      |         |          |       |     |          |           |        |      |       |          |       |     |
|------|---------|----------------|---------------------------------------------------|------|---------|----------|-------|-----|----------|-----------|--------|------|-------|----------|-------|-----|
| 9567 | Choctaw | Pennington     | Utilities Board of the Town of Pennington         | 87   | \$468   | \$18,720 | 29.3% | 25  | \$468    | \$18,720  | 29.3%  | 25   | \$468 | \$18,720 | 29.3% | 25  |
| 9568 | Choctaw | Unincorporated | OWTS                                              | 985  | \$1,819 | \$72,778 | 74.3% | 732 | \$20,000 | \$800,000 | 99.9%  | 985  | \$100 | \$4,000  | 4.4%  | 43  |
| 9568 | Choctaw | Butler         | Utilities Board of the Town of Butler             | 729  | \$246   | \$9,840  | 10.8% | 79  | \$246    | \$9,840   | 10.8%  | 79   | \$246 | \$9,840  | 10.8% | 79  |
| 9569 | Choctaw | Unincorporated | OWTS                                              | 1243 | \$1,819 | \$72,778 | 68.9% | 857 | \$20,000 | \$800,000 | 100.0% | 1243 | \$100 | \$4,000  | 4.6%  | 58  |
| 9569 | Choctaw | Toxey          | OWTS                                              | 4    | \$1,819 | \$72,776 | 68.9% | 3   | \$20,000 | \$800,000 | 100.0% | 4    | \$100 | \$4,000  | 4.6%  | 0   |
| 9569 | Choctaw | Needham        | OWTS                                              | 3    | \$1,819 | \$72,776 | 68.9% | 2   | \$20,000 | \$800,000 | 100.0% | 3    | \$100 | \$4,000  | 4.6%  | 0   |
| 9569 | Choctaw | Gilbertown     | Utilities Board of the Town of Gilbertown         | 73   | \$547   | \$21,888 | 21.4% | 16  | \$547    | \$21,888  | 21.4%  | 16   | \$547 | \$21,888 | 21.4% | 16  |
| 9570 | Choctaw | Unincorporated | OWTS                                              | 891  | \$1,819 | \$72,778 | 70.9% | 631 | \$20,000 | \$800,000 | 100.0% | 891  | \$100 | \$4,000  | 4.2%  | 38  |
| 9570 | Choctaw | Silas          | OWTS                                              | 27   | \$1,819 | \$72,776 | 70.9% | 19  | \$20,000 | \$800,000 | 100.0% | 27   | \$100 | \$4,000  | 4.2%  | 1   |
| 9575 | Clarke  | Unincorporated | OWTS                                              | 472  | \$530   | \$21,192 | 33.5% | 158 | \$5,000  | \$200,000 | 100.0% | 472  | \$100 | \$4,000  | 4.9%  | 23  |
| 9575 | Clarke  | Fulton         | Fulton                                            | 87   | \$450   | \$18,000 | 28.1% | 24  | \$450    | \$18,000  | 28.1%  | 24   | \$450 | \$18,000 | 28.1% | 24  |
| 9575 | Clarke  | Thomasville    | City of Thomasville Water Works and Sewer Board   | 1    | \$299   | \$11,942 | 16.5% | 0   | \$299    | \$11,942  | 16.5%  | 0    | \$299 | \$11,942 | 16.5% | 0   |
| 9576 | Clarke  | Unincorporated | OWTS                                              | 347  | \$530   | \$21,192 | 27.8% | 96  | \$5,000  | \$200,000 | 99.9%  | 347  | \$100 | \$4,000  | 7.6%  | 26  |
| 9576 | Clarke  | Thomasville    | City of Thomasville Water Works and Sewer Board   | 33   | \$299   | \$11,942 | 19.8% | 7   | \$299    | \$11,942  | 19.8%  | 7    | \$299 | \$11,942 | 19.8% | 7   |
| 9576 | Clarke  | Unincorporated | OWTS                                              | 267  | \$530   | \$21,192 | 30.4% | 81  | \$5,000  | \$200,000 | 100.0% | 267  | \$100 | \$4,000  | 6.0%  | 16  |
| 9576 | Clarke  | Thomasville    | City of Thomasville Water Works and Sewer Board   | 1809 | \$299   | \$11,942 | 18.1% | 327 | \$299    | \$11,942  | 18.1%  | 327  | \$299 | \$11,942 | 18.1% | 327 |
| 9577 | Clarke  | Unincorporated | OWTS                                              | 486  | \$530   | \$21,192 | 38.9% | 189 | \$5,000  | \$200,000 | 100.0% | 486  | \$100 | \$4,000  | 8.4%  | 41  |
| 9577 | Clarke  | Coffeeville    | Town of Coffeeville                               | 39   | \$540   | \$21,600 | 39.3% | 15  | \$540    | \$21,600  | 39.3%  | 15   | \$540 | \$21,600 | 39.3% | 15  |
| 9578 | Clarke  | Unincorporated | OWTS                                              | 1271 | \$530   | \$21,192 | 35.4% | 450 | \$5,000  | \$200,000 | 99.9%  | 1271 | \$100 | \$4,000  | 9.3%  | 118 |
| 9578 | Clarke  | Grove Hill     | Utilities Board of the Town of Grove Hill         | 588  | \$395   | \$15,782 | 30.7% | 181 | \$395    | \$15,782  | 30.7%  | 181  | \$395 | \$15,782 | 30.7% | 181 |
| 9579 | Clarke  | Unincorporated | OWTS                                              | 392  | \$530   | \$21,192 | 32.2% | 126 | \$5,000  | \$200,000 | 99.9%  | 392  | \$100 | \$4,000  | 6.6%  | 26  |
| 9579 | Clarke  | Jackson        | Jackson Water Works & Sewer Board                 | 793  | \$372   | \$14,880 | 23.6% | 187 | \$372    | \$14,880  | 23.6%  | 187  | \$372 | \$14,880 | 23.6% | 187 |
| 9579 | Clarke  | Unincorporated | OWTS                                              | 111  | \$530   | \$21,192 | 31.0% | 34  | \$5,000  | \$200,000 | 99.8%  | 111  | \$100 | \$4,000  | 9.6%  | 11  |
| 9579 | Clarke  | Jackson        | Jackson Water Works & Sewer Board                 | 1363 | \$372   | \$14,880 | 26.9% | 367 | \$372    | \$14,880  | 26.9%  | 367  | \$372 | \$14,880 | 26.9% | 367 |
| 9580 | Clarke  | Unincorporated | OWTS                                              | 526  | \$530   | \$21,192 | 20.7% | 109 | \$5,000  | \$200,000 | 100.0% | 526  | \$100 | \$4,000  | 4.9%  | 26  |
| 9580 | Clarke  | Unincorporated | OWTS                                              | 505  | \$530   | \$21,192 | 41.6% | 210 | \$5,000  | \$200,000 | 100.0% | 505  | \$100 | \$4,000  | 8.2%  | 41  |
| 9589 | Clay    | Unincorporated | OWTS                                              | 1102 | \$530   | \$21,192 | 18.5% | 204 | \$5,000  | \$200,000 | 100.0% | 1102 | \$100 | \$4,000  | 3.6%  | 40  |
| 9589 | Clay    | Lineville      | Waterworks & Sewer Board of the City of Lineville | 976  | \$357   | \$14,290 | 13.3% | 130 | \$357    | \$14,290  | 13.3%  | 130  | \$357 | \$14,290 | 13.3% | 130 |
| 9590 | Clay    | Unincorporated | OWTS                                              | 499  | \$530   | \$21,192 | 37.2% | 186 | \$5,000  | \$200,000 | 99.8%  | 499  | \$100 | \$4,000  | 3.1%  | 16  |

|        |          |                |                                                         |      |       |          |       |     |         |           |        |      |       |          |       |     |
|--------|----------|----------------|---------------------------------------------------------|------|-------|----------|-------|-----|---------|-----------|--------|------|-------|----------|-------|-----|
| 9590   | Clay     | Ashland        | Waterworks and Sewer Board of the City of Ashland       | 677  | \$297 | \$11,875 | 14.3% | 97  | \$297   | \$11,875  | 14.3%  | 97   | \$297 | \$11,875 | 14.3% | 97  |
| 9591   | Clay     | Unincorporated | OWTS                                                    | 941  | \$530 | \$21,192 | 19.1% | 180 | \$5,000 | \$200,000 | 100.0% | 941  | \$100 | \$4,000  | 2.9%  | 27  |
| 9591   | Clay     | Ashland        | Waterworks and Sewer Board of the City of Ashland       | 107  | \$297 | \$11,875 | 8.1%  | 9   | \$297   | \$11,875  | 8.1%   | 9    | \$297 | \$11,875 | 8.1%  | 9   |
| 9592   | Clay     | Unincorporated | OWTS                                                    | 896  | \$530 | \$21,192 | 17.8% | 160 | \$5,000 | \$200,000 | 100.0% | 896  | \$100 | \$4,000  | 2.2%  | 19  |
| 9595   | Cleburne | Unincorporated | OWTS                                                    | 884  | \$530 | \$21,192 | 19.6% | 173 | \$5,000 | \$200,000 | 99.9%  | 884  | \$100 | \$4,000  | 3.4%  | 30  |
| 9595   | Cleburne | Edwardsville   | OWTS                                                    | 79   | \$530 | \$21,194 | 19.6% | 15  | \$5,000 | \$200,000 | 99.9%  | 79   | \$100 | \$4,000  | 3.4%  | 3   |
| 9595   | Cleburne | Fruithurst     | OWTS                                                    | 5    | \$530 | \$21,194 | 19.6% | 1   | \$5,000 | \$200,000 | 99.9%  | 5    | \$100 | \$4,000  | 3.4%  | 0   |
| 9596   | Cleburne | Unincorporated | OWTS                                                    | 929  | \$530 | \$21,192 | 37.9% | 352 | \$5,000 | \$200,000 | 100.0% | 929  | \$100 | \$4,000  | 7.2%  | 67  |
| 9596   | Cleburne | Edwardsville   | OWTS                                                    | 15   | \$530 | \$21,194 | 37.9% | 6   | \$5,000 | \$200,000 | 100.0% | 15   | \$100 | \$4,000  | 7.2%  | 1   |
| 9596   | Cleburne | Heflin         | Heflin Water Works and Sewer Board                      | 639  | \$306 | \$12,240 | 21.2% | 135 | \$306   | \$12,240  | 21.2%  | 135  | \$306 | \$12,240 | 21.2% | 135 |
| 9597   | Cleburne | Unincorporated | OWTS                                                    | 1261 | \$530 | \$21,192 | 21.6% | 272 | \$5,000 | \$200,000 | 100.0% | 1261 | \$100 | \$4,000  | 0.8%  | 10  |
| 9597   | Cleburne | Heflin         | Heflin Water Works and Sewer Board                      | 57   | \$306 | \$12,240 | 4.7%  | 3   | \$306   | \$12,240  | 4.7%   | 3    | \$306 | \$12,240 | 4.7%  | 3   |
| 9598   | Cleburne | Unincorporated | OWTS                                                    | 1786 | \$530 | \$21,192 | 17.7% | 316 | \$5,000 | \$200,000 | 100.0% | 1786 | \$100 | \$4,000  | 3.0%  | 54  |
| 9598   | Cleburne | Ranburne       | OWTS                                                    | 25   | \$530 | \$21,194 | 17.7% | 4   | \$5,000 | \$200,000 | 100.0% | 25   | \$100 | \$4,000  | 3.0%  | 1   |
| 101    | Coffee   | Unincorporated | OWTS                                                    | 777  | \$530 | \$21,192 | 20.6% | 160 | \$5,000 | \$200,000 | 100.0% | 777  | \$100 | \$4,000  | 2.3%  | 18  |
| 102    | Coffee   | Unincorporated | OWTS                                                    | 713  | \$530 | \$21,192 | 21.2% | 151 | \$5,000 | \$200,000 | 100.0% | 713  | \$100 | \$4,000  | 4.0%  | 29  |
| 103    | Coffee   | Unincorporated | OWTS                                                    | 1372 | \$530 | \$21,192 | 16.4% | 225 | \$5,000 | \$200,000 | 100.0% | 1372 | \$100 | \$4,000  | 2.4%  | 32  |
| 103    | Coffee   | New Brockton   | Water Works and Sewer Board of the Town of New Brockton | 353  | \$410 | \$16,402 | 13.2% | 46  | \$410   | \$16,402  | 13.2%  | 46   | \$410 | \$16,402 | 13.2% | 46  |
| 103    | Coffee   | Enterprise     | City of Enterprise                                      | 108  | \$161 | \$6,442  | 3.8%  | 4   | \$161   | \$6,442   | 3.8%   | 4    | \$161 | \$6,442  | 3.8%  | 4   |
| 104    | Coffee   | Unincorporated | OWTS                                                    | 543  | \$530 | \$21,192 | 26.8% | 145 | \$5,000 | \$200,000 | 100.0% | 543  | \$100 | \$4,000  | 3.2%  | 17  |
| 104    | Coffee   | Elba           | City of Elba                                            | 170  | \$225 | \$9,000  | 7.1%  | 12  | \$225   | \$9,000   | 7.1%   | 12   | \$225 | \$9,000  | 7.1%  | 12  |
| 105    | Coffee   | Unincorporated | OWTS                                                    | 1427 | \$530 | \$21,192 | 23.6% | 337 | \$5,000 | \$200,000 | 99.9%  | 1427 | \$100 | \$4,000  | 3.8%  | 55  |
| 105    | Coffee   | Elba           | City of Elba                                            | 321  | \$225 | \$9,000  | 8.6%  | 28  | \$225   | \$9,000   | 8.6%   | 28   | \$225 | \$9,000  | 8.6%  | 28  |
| 106    | Coffee   | Unincorporated | OWTS                                                    | 551  | \$530 | \$21,192 | 26.5% | 146 | \$5,000 | \$200,000 | 100.0% | 551  | \$100 | \$4,000  | 3.5%  | 19  |
| 106    | Coffee   | Kinston        | OWTS                                                    | 60   | \$530 | \$21,194 | 26.5% | 16  | \$5,000 | \$200,000 | 100.0% | 60   | \$100 | \$4,000  | 3.5%  | 2   |
| 107    | Coffee   | Unincorporated | OWTS                                                    | 908  | \$530 | \$21,192 | 17.9% | 162 | \$5,000 | \$200,000 | 100.0% | 908  | \$100 | \$4,000  | 2.7%  | 25  |
| 108    | Coffee   | Unincorporated | OWTS                                                    | 1029 | \$530 | \$21,192 | 11.8% | 122 | \$5,000 | \$200,000 | 100.0% | 1029 | \$100 | \$4,000  | 1.1%  | 12  |
| 108    | Coffee   | Enterprise     | City of Enterprise                                      | 111  | \$161 | \$6,442  | 1.8%  | 2   | \$161   | \$6,442   | 1.8%   | 2    | \$161 | \$6,442  | 1.8%  | 2   |
| 109    | Coffee   | Unincorporated | OWTS                                                    | 64   | \$530 | \$21,192 | 25.4% | 16  | \$5,000 | \$200,000 | 100.0% | 64   | \$100 | \$4,000  | 4.1%  | 3   |
| 109    | Coffee   | Enterprise     | City of Enterprise                                      | 744  | \$161 | \$6,442  | 6.6%  | 49  | \$161   | \$6,442   | 6.6%   | 49   | \$161 | \$6,442  | 6.6%  | 49  |
| 110    | Coffee   | Unincorporated | OWTS                                                    | 183  | \$530 | \$21,192 | 17.2% | 31  | \$5,000 | \$200,000 | 100.0% | 183  | \$100 | \$4,000  | 2.9%  | 5   |
| 110    | Coffee   | Enterprise     | City of Enterprise                                      | 1072 | \$161 | \$6,442  | 4.6%  | 50  | \$161   | \$6,442   | 4.6%   | 50   | \$161 | \$6,442  | 4.6%  | 50  |
| 111    | Coffee   | Enterprise     | City of Enterprise                                      | 896  | \$161 | \$6,442  | 3.3%  | 30  | \$161   | \$6,442   | 3.3%   | 30   | \$161 | \$6,442  | 3.3%  | 30  |
| 112.01 | Coffee   | Unincorporated | OWTS                                                    | 861  | \$530 | \$21,192 | 6.0%  | 52  | \$5,000 | \$200,000 | 100.0% | 861  | \$100 | \$4,000  | 1.1%  | 9   |

|        |         |                |                                               |      |       |          |       |     |         |           |        |      |       |          |       |     |
|--------|---------|----------------|-----------------------------------------------|------|-------|----------|-------|-----|---------|-----------|--------|------|-------|----------|-------|-----|
| 112.01 | Coffee  | Enterprise     | City of Enterprise                            | 2476 | \$161 | \$6,442  | 1.7%  | 43  | \$161   | \$6,442   | 1.7%   | 43   | \$161 | \$6,442  | 1.7%  | 43  |
| 112.02 | Coffee  | Unincorporated | OWTS                                          | 1711 | \$530 | \$21,192 | 14.3% | 244 | \$5,000 | \$200,000 | 100.0% | 1711 | \$100 | \$4,000  | 3.2%  | 54  |
| 112.02 | Coffee  | Enterprise     | City of Enterprise                            | 1846 | \$161 | \$6,442  | 5.1%  | 94  | \$161   | \$6,442   | 5.1%   | 94   | \$161 | \$6,442  | 5.1%  | 94  |
| 113    | Coffee  | Unincorporated | OWTS                                          | 112  | \$530 | \$21,192 | 38.9% | 44  | \$5,000 | \$200,000 | 100.0% | 112  | \$100 | \$4,000  | 5.8%  | 6   |
| 113    | Coffee  | Enterprise     | City of Enterprise                            | 1516 | \$161 | \$6,442  | 9.3%  | 141 | \$161   | \$6,442   | 9.3%   | 141  | \$161 | \$6,442  | 9.3%  | 141 |
| 201    | Colbert | Unincorporated | OWTS                                          | 235  | \$530 | \$21,192 | 36.7% | 86  | \$5,000 | \$200,000 | 100.0% | 235  | \$100 | \$4,000  | 8.8%  | 21  |
| 201    | Colbert | Sheffield      | Sheffield Utilities                           | 1308 | \$525 | \$20,995 | 36.4% | 476 | \$525   | \$20,995  | 36.4%  | 476  | \$525 | \$20,995 | 36.4% | 476 |
| 202    | Colbert | Unincorporated | OWTS                                          | 190  | \$530 | \$21,192 | 33.2% | 63  | \$5,000 | \$200,000 | 100.0% | 190  | \$100 | \$4,000  | 3.5%  | 7   |
| 202    | Colbert | Sheffield      | Sheffield Utilities                           | 596  | \$525 | \$20,995 | 32.8% | 195 | \$525   | \$20,995  | 32.8%  | 195  | \$525 | \$20,995 | 32.8% | 195 |
| 203    | Colbert | Sheffield      | Sheffield Utilities                           | 1018 | \$525 | \$20,995 | 48.6% | 495 | \$525   | \$20,995  | 48.6%  | 495  | \$525 | \$20,995 | 48.6% | 495 |
| 204    | Colbert | Unincorporated | OWTS                                          | 140  | \$530 | \$21,192 | 8.3%  | 12  | \$5,000 | \$200,000 | 100.0% | 140  | \$100 | \$4,000  | 0.4%  | 1   |
| 204    | Colbert | Sheffield      | Sheffield Utilities                           | 546  | \$525 | \$20,995 | 8.1%  | 44  | \$525   | \$20,995  | 8.1%   | 44   | \$525 | \$20,995 | 8.1%  | 44  |
| 205    | Colbert | Unincorporated | OWTS                                          | 342  | \$530 | \$21,192 | 19.3% | 66  | \$5,000 | \$200,000 | 100.0% | 342  | \$100 | \$4,000  | 2.6%  | 9   |
| 205    | Colbert | Tuscumbia      | City of Tuscumbia Department of Utilities     | 1663 | \$217 | \$8,664  | 5.6%  | 94  | \$217   | \$8,664   | 5.6%   | 94   | \$217 | \$8,664  | 5.6%  | 94  |
| 206    | Colbert | Unincorporated | OWTS                                          | 267  | \$530 | \$21,192 | 26.3% | 70  | \$5,000 | \$200,000 | 100.0% | 267  | \$100 | \$4,000  | 4.5%  | 12  |
| 206    | Colbert | Muscle Shoals  | Muscle Shoals Utilities Board                 | 112  | \$483 | \$19,320 | 23.5% | 26  | \$483   | \$19,320  | 23.5%  | 26   | \$483 | \$19,320 | 23.5% | 26  |
| 206    | Colbert | Tuscumbia      | City of Tuscumbia Department of Utilities     | 1423 | \$217 | \$8,664  | 9.7%  | 138 | \$217   | \$8,664   | 9.7%   | 138  | \$217 | \$8,664  | 9.7%  | 138 |
| 207.01 | Colbert | Sheffield      | Sheffield Utilities                           | 2396 | \$525 | \$20,995 | 13.0% | 19  | \$525   | \$20,995  | 13.0%  | 19   | \$525 | \$20,995 | 13.0% | 19  |
| 207.01 | Colbert | Muscle Shoals  | Muscle Shoals Utilities Board                 | 147  | \$483 | \$19,320 | 11.0% | 263 | \$483   | \$19,320  | 11.0%  | 263  | \$483 | \$19,320 | 11.0% | 263 |
| 207.01 | Colbert | Tuscumbia      | City of Tuscumbia Department of Utilities     | 6    | \$217 | \$8,664  | 4.3%  | 0   | \$217   | \$8,664   | 4.3%   | 0    | \$217 | \$8,664  | 4.3%  | 0   |
| 207.03 | Colbert | Muscle Shoals  | Muscle Shoals Utilities Board                 | 1971 | \$483 | \$19,320 | 19.0% | 375 | \$483   | \$19,320  | 19.0%  | 375  | \$483 | \$19,320 | 19.0% | 375 |
| 207.04 | Colbert | Sheffield      | Sheffield Utilities                           | 32   | \$525 | \$20,995 | 13.4% | 4   | \$525   | \$20,995  | 13.4%  | 4    | \$525 | \$20,995 | 13.4% | 4   |
| 207.04 | Colbert | Muscle Shoals  | Muscle Shoals Utilities Board                 | 1626 | \$483 | \$19,320 | 11.2% | 181 | \$483   | \$19,320  | 11.2%  | 181  | \$483 | \$19,320 | 11.2% | 181 |
| 208.01 | Colbert | Unincorporated | OWTS                                          | 1689 | \$530 | \$21,192 | 20.7% | 350 | \$5,000 | \$200,000 | 100.0% | 1689 | \$100 | \$4,000  | 2.7%  | 46  |
| 208.01 | Colbert | Muscle Shoals  | Muscle Shoals Utilities Board                 | 57   | \$483 | \$19,320 | 18.5% | 11  | \$483   | \$19,320  | 18.5%  | 11   | \$483 | \$19,320 | 18.5% | 11  |
| 208.02 | Colbert | Unincorporated | OWTS                                          | 1076 | \$530 | \$21,192 | 24.2% | 260 | \$5,000 | \$200,000 | 99.9%  | 1076 | \$100 | \$4,000  | 2.8%  | 31  |
| 208.02 | Colbert | Muscle Shoals  | Muscle Shoals Utilities Board                 | 111  | \$483 | \$19,320 | 21.9% | 24  | \$483   | \$19,320  | 21.9%  | 24   | \$483 | \$19,320 | 21.9% | 24  |
| 208.02 | Colbert | Leighton       | Water and Sewer Board of the Town of Leighton | 284  | \$354 | \$14,155 | 15.2% | 43  | \$354   | \$14,155  | 15.2%  | 43   | \$354 | \$14,155 | 15.2% | 43  |
| 209.01 | Colbert | Unincorporated | OWTS                                          | 1117 | \$530 | \$21,192 | 24.7% | 276 | \$5,000 | \$200,000 | 100.0% | 1117 | \$100 | \$4,000  | 4.4%  | 49  |
| 209.01 | Colbert | Littleville    | Town of Littleville                           | 387  | \$463 | \$18,538 | 21.2% | 82  | \$463   | \$18,538  | 21.2%  | 82   | \$463 | \$18,538 | 21.2% | 82  |
| 209.01 | Colbert | Tuscumbia      | City of Tuscumbia Department of Utilities     | 133  | \$217 | \$8,664  | 9.4%  | 13  | \$217   | \$8,664   | 9.4%   | 13   | \$217 | \$8,664  | 9.4%  | 13  |
| 209.02 | Colbert | Unincorporated | OWTS                                          | 1296 | \$530 | \$21,192 | 23.1% | 299 | \$5,000 | \$200,000 | 100.0% | 1296 | \$100 | \$4,000  | 2.8%  | 36  |

|        |           |                |                                           |      |         |          |       |     |          |           |        |      |       |          |       |     |
|--------|-----------|----------------|-------------------------------------------|------|---------|----------|-------|-----|----------|-----------|--------|------|-------|----------|-------|-----|
| 209.02 | Colbert   | Tuscumbia      | City of Tuscumbia Department of Utilities | 69   | \$217   | \$8,664  | 6.1%  | 4   | \$217    | \$8,664   | 6.1%   | 4    | \$217 | \$8,664  | 6.1%  | 4   |
| 210    | Colbert   | Unincorporated | OWTS                                      | 1248 | \$530   | \$21,192 | 23.1% | 289 | \$5,000  | \$200,000 | 100.0% | 1248 | \$100 | \$4,000  | 3.4%  | 43  |
| 210    | Colbert   | Cherokee       | Town of Cherokee                          | 394  | \$504   | \$20,160 | 21.2% | 84  | \$504    | \$20,160  | 21.2%  | 84   | \$504 | \$20,160 | 21.2% | 84  |
| 9602   | Conecuh   | Unincorporated | OWTS                                      | 633  | \$530   | \$21,192 | 22.6% | 143 | \$5,000  | \$200,000 | 100.0% | 633  | \$100 | \$4,000  | 5.0%  | 32  |
| 9603   | Conecuh   | Unincorporated | OWTS                                      | 647  | \$530   | \$21,192 | 33.3% | 215 | \$5,000  | \$200,000 | 100.0% | 647  | \$100 | \$4,000  | 6.4%  | 42  |
| 9603   | Conecuh   | Repton         | OWTS                                      | 4    | \$530   | \$21,194 | 33.3% | 1   | \$5,000  | \$200,000 | 100.0% | 4    | \$100 | \$4,000  | 6.4%  | 0   |
| 9604   | Conecuh   | Unincorporated | OWTS                                      | 1125 | \$530   | \$21,192 | 26.3% | 296 | \$5,000  | \$200,000 | 100.0% | 1125 | \$100 | \$4,000  | 3.4%  | 39  |
| 9604   | Conecuh   | Castleberry    | OWTS                                      | 11   | \$530   | \$21,194 | 26.3% | 3   | \$5,000  | \$200,000 | 100.0% | 11   | \$100 | \$4,000  | 3.4%  | 0   |
| 9604   | Conecuh   | Evergreen      | City of Evergreen                         | 40   | \$384   | \$15,360 | 16.9% | 7   | \$384    | \$15,360  | 16.9%  | 7    | \$384 | \$15,360 | 16.9% | 7   |
| 9605   | Conecuh   | Unincorporated | OWTS                                      | 9    | \$530   | \$21,192 | 41.9% | 4   | \$5,000  | \$200,000 | 100.0% | 9    | \$100 | \$4,000  | 3.9%  | 0   |
| 9605   | Conecuh   | Evergreen      | City of Evergreen                         | 676  | \$384   | \$15,360 | 31.7% | 214 | \$384    | \$15,360  | 31.7%  | 214  | \$384 | \$15,360 | 31.7% | 214 |
| 9606   | Conecuh   | McKenzie       | OWTS                                      | 2    | \$1,819 | \$72,776 | 84.0% | 2   | \$20,000 | \$800,000 | 100.0% | 2    | \$100 | \$4,000  | 4.0%  | 0   |
| 9606   | Conecuh   | Unincorporated | OWTS                                      | 828  | \$530   | \$21,192 | 22.0% | 182 | \$5,000  | \$200,000 | 100.0% | 828  | \$100 | \$4,000  | 4.0%  | 33  |
| 9606   | Conecuh   | Evergreen      | City of Evergreen                         | 579  | \$384   | \$15,360 | 19.3% | 112 | \$384    | \$15,360  | 19.3%  | 112  | \$384 | \$15,360 | 19.3% | 112 |
| 9610   | Coosa     | Unincorporated | OWTS                                      | 654  | \$530   | \$21,192 | 33.2% | 217 | \$5,000  | \$200,000 | 99.9%  | 654  | \$100 | \$4,000  | 3.6%  | 23  |
| 9610   | Coosa     | Kellyton       | OWTS                                      | 13   | \$530   | \$21,194 | 33.2% | 4   | \$5,000  | \$200,000 | 99.9%  | 13   | \$100 | \$4,000  | 3.6%  | 0   |
| 9610   | Coosa     | Goodwater      | Goodwater Water Works and Sewer Board     | 597  | \$391   | \$15,648 | 22.5% | 135 | \$391    | \$15,648  | 22.5%  | 135  | \$391 | \$15,648 | 22.5% | 135 |
| 9611   | Coosa     | Unincorporated | OWTS                                      | 1298 | \$530   | \$21,192 | 17.2% | 223 | \$5,000  | \$200,000 | 100.0% | 1298 | \$100 | \$4,000  | 0.2%  | 2   |
| 9612   | Coosa     | Unincorporated | OWTS                                      | 1364 | \$530   | \$21,192 | 20.1% | 274 | \$5,000  | \$200,000 | 100.0% | 1364 | \$100 | \$4,000  | 2.4%  | 33  |
| 9612   | Coosa     | Rockford       | Rockford Utilities Board                  | 107  | \$252   | \$10,080 | 6.2%  | 7   | \$252    | \$10,080  | 6.2%   | 7    | \$252 | \$10,080 | 6.2%  | 7   |
| 9616   | Covington | Unincorporated | OWTS                                      | 1613 | \$530   | \$21,192 | 15.5% | 250 | \$5,000  | \$200,000 | 100.0% | 1613 | \$100 | \$4,000  | 2.0%  | 32  |
| 9616   | Covington | Gantt          | OWTS                                      | 8    | \$530   | \$21,194 | 15.5% | 1   | \$5,000  | \$200,000 | 100.0% | 8    | \$100 | \$4,000  | 2.0%  | 0   |
| 9617   | Covington | Unincorporated | OWTS                                      | 1453 | \$530   | \$21,192 | 24.8% | 361 | \$5,000  | \$200,000 | 99.9%  | 1453 | \$100 | \$4,000  | 4.6%  | 67  |
| 9617   | Covington | River Falls    | OWTS                                      | 53   | \$530   | \$21,194 | 24.8% | 13  | \$5,000  | \$200,000 | 99.9%  | 53   | \$100 | \$4,000  | 4.6%  | 2   |
| 9617   | Covington | Red Level      | OWTS                                      | 15   | \$530   | \$21,194 | 24.8% | 4   | \$5,000  | \$200,000 | 99.9%  | 15   | \$100 | \$4,000  | 4.6%  | 1   |
| 9618   | Covington | Unincorporated | OWTS                                      | 31   | \$530   | \$21,192 | 34.5% | 11  | \$5,000  | \$200,000 | 100.0% | 31   | \$100 | \$4,000  | 5.2%  | 2   |
| 9618   | Covington | Andalusia      | Utilities Board of The City Of Andalusia  | 1203 | \$401   | \$16,032 | 27.5% | 331 | \$401    | \$16,032  | 27.5%  | 331  | \$401 | \$16,032 | 27.5% | 331 |
| 9619   | Covington | Unincorporated | OWTS                                      | 26   | \$530   | \$21,192 | 18.3% | 5   | \$5,000  | \$200,000 | 99.9%  | 26   | \$100 | \$4,000  | 4.0%  | 1   |
| 9619   | Covington | Libertyville   | OWTS                                      | 27   | \$530   | \$21,194 | 18.3% | 5   | \$5,000  | \$200,000 | 99.9%  | 27   | \$100 | \$4,000  | 4.0%  | 1   |
| 9619   | Covington | Andalusia      | Utilities Board of The City Of Andalusia  | 785  | \$401   | \$16,032 | 13.5% | 106 | \$401    | \$16,032  | 13.5%  | 106  | \$401 | \$16,032 | 13.5% | 106 |
| 9620   | Covington | Heath          | OWTS                                      | 36   | \$530   | \$21,194 | 31.5% | 11  | \$5,000  | \$200,000 | 100.0% | 36   | \$100 | \$4,000  | 5.0%  | 2   |
| 9620   | Covington | Andalusia      | Utilities Board of The City Of Andalusia  | 1620 | \$401   | \$16,032 | 23.0% | 372 | \$401    | \$16,032  | 23.0%  | 372  | \$401 | \$16,032 | 23.0% | 372 |
| 9621   | Covington | River Falls    | OWTS                                      | 17   | \$530   | \$21,194 | 34.0% | 6   | \$5,000  | \$200,000 | 100.0% | 17   | \$100 | \$4,000  | 6.8%  | 1   |
| 9621   | Covington | Andalusia      | Utilities Board of The City Of Andalusia  | 668  | \$401   | \$16,032 | 26.3% | 176 | \$401    | \$16,032  | 26.3%  | 176  | \$401 | \$16,032 | 26.3% | 176 |
| 9623   | Covington | Unincorporated | OWTS                                      | 718  | \$530   | \$21,192 | 23.9% | 171 | \$5,000  | \$200,000 | 100.0% | 718  | \$100 | \$4,000  | 3.6%  | 26  |
| 9623   | Covington | Babbie         | OWTS                                      | 143  | \$530   | \$21,194 | 23.9% | 34  | \$5,000  | \$200,000 | 100.0% | 143  | \$100 | \$4,000  | 3.6%  | 5   |

|      |           |                |                                                        |      |         |          |       |     |          |           |        |     |       |          |       |     |
|------|-----------|----------------|--------------------------------------------------------|------|---------|----------|-------|-----|----------|-----------|--------|-----|-------|----------|-------|-----|
| 9623 | Covington | Sanford        | OWTS                                                   | 52   | \$530   | \$21,194 | 23.9% | 12  | \$5,000  | \$200,000 | 100.0% | 52  | \$100 | \$4,000  | 3.6%  | 2   |
| 9623 | Covington | Andalusia      | Utilities Board of The City Of Andalusia               | 431  | \$401   | \$16,032 | 17.6% | 76  | \$401    | \$16,032  | 17.6%  | 76  | \$401 | \$16,032 | 17.6% | 76  |
| 9624 | Covington | Unincorporated | OWTS                                                   | 266  | \$530   | \$21,192 | 17.6% | 47  | \$5,000  | \$200,000 | 100.0% | 266 | \$100 | \$4,000  | 2.0%  | 5   |
| 9624 | Covington | Opp            | Utilities Board of the City of Opp                     | 1029 | \$428   | \$17,112 | 11.7% | 120 | \$428    | \$17,112  | 11.7%  | 120 | \$428 | \$17,112 | 11.7% | 120 |
| 9625 | Covington | Opp            | Utilities Board of the City of Opp                     | 574  | \$428   | \$17,112 | 24.4% | 140 | \$428    | \$17,112  | 24.4%  | 140 | \$428 | \$17,112 | 24.4% | 140 |
| 9626 | Covington | Opp            | Utilities Board of the City of Opp                     | 588  | \$428   | \$17,112 | 19.4% | 114 | \$428    | \$17,112  | 19.4%  | 114 | \$428 | \$17,112 | 19.4% | 114 |
| 9627 | Covington | Unincorporated | OWTS                                                   | 119  | \$530   | \$21,192 | 38.0% | 45  | \$5,000  | \$200,000 | 100.0% | 119 | \$100 | \$4,000  | 7.5%  | 9   |
| 9627 | Covington | Opp            | Utilities Board of the City of Opp                     | 650  | \$428   | \$17,112 | 33.6% | 219 | \$428    | \$17,112  | 33.6%  | 219 | \$428 | \$17,112 | 33.6% | 219 |
| 9628 | Covington | Unincorporated | OWTS                                                   | 439  | \$530   | \$21,192 | 18.9% | 83  | \$5,000  | \$200,000 | 100.0% | 439 | \$100 | \$4,000  | 2.8%  | 12  |
| 9628 | Covington | Horn Hill      | OWTS                                                   | 18   | \$530   | \$21,194 | 18.9% | 3   | \$5,000  | \$200,000 | 100.0% | 18  | \$100 | \$4,000  | 2.8%  | 1   |
| 9628 | Covington | Onycha         | OWTS                                                   | 6    | \$530   | \$21,194 | 18.9% | 1   | \$5,000  | \$200,000 | 100.0% | 6   | \$100 | \$4,000  | 2.8%  | 0   |
| 9628 | Covington | Opp            | Utilities Board of the City of Opp                     | 211  | \$428   | \$17,112 | 12.9% | 27  | \$428    | \$17,112  | 12.9%  | 27  | \$428 | \$17,112 | 12.9% | 27  |
| 9629 | Covington | Unincorporated | OWTS                                                   | 795  | \$530   | \$21,192 | 15.9% | 127 | \$5,000  | \$200,000 | 100.0% | 795 | \$100 | \$4,000  | 1.2%  | 9   |
| 9629 | Covington | Carolina       | OWTS                                                   | 4    | \$530   | \$21,194 | 15.9% | 1   | \$5,000  | \$200,000 | 100.0% | 4   | \$100 | \$4,000  | 1.2%  | 0   |
| 9630 | Covington | Lockhart       | Town of Lockhart and Florala Utilities Board           | 173  | \$336   | \$13,440 | 16.3% | 28  | \$336    | \$13,440  | 16.3%  | 28  | \$336 | \$13,440 | 16.3% | 28  |
| 9630 | Covington | Florala        | Florala Utilities Board                                | 1081 | \$288   | \$11,520 | 12.7% | 137 | \$288    | \$11,520  | 12.7%  | 137 | \$288 | \$11,520 | 12.7% | 137 |
| 9634 | Crenshaw  | Unincorporated | OWTS                                                   | 671  | \$1,819 | \$72,778 | 76.3% | 512 | \$20,000 | \$800,000 | 99.9%  | 671 | \$100 | \$4,000  | 2.1%  | 14  |
| 9634 | Crenshaw  | Petrey         | OWTS                                                   | 5    | \$1,819 | \$72,776 | 76.3% | 4   | \$20,000 | \$800,000 | 99.9%  | 5   | \$100 | \$4,000  | 2.1%  | 0   |
| 9635 | Crenshaw  | Unincorporated | OWTS                                                   | 642  | \$1,819 | \$72,778 | 72.5% | 465 | \$20,000 | \$800,000 | 99.9%  | 642 | \$100 | \$4,000  | 3.4%  | 22  |
| 9636 | Crenshaw  | Unincorporated | OWTS                                                   | 613  | \$1,819 | \$72,778 | 75.5% | 463 | \$20,000 | \$800,000 | 99.9%  | 613 | \$100 | \$4,000  | 1.9%  | 12  |
| 9636 | Crenshaw  | Rutledge       | Town of Rutledge                                       | 183  | \$282   | \$11,280 | 8.6%  | 16  | \$282    | \$11,280  | 8.6%   | 16  | \$282 | \$11,280 | 8.6%  | 16  |
| 9636 | Crenshaw  | Luverne        | The Water Works and Sewer Board of the City of Luverne | 325  | \$265   | \$10,584 | 6.5%  | 21  | \$265    | \$10,584  | 6.5%   | 21  | \$265 | \$10,584 | 6.5%  | 21  |
| 9637 | Crenshaw  | Unincorporated | OWTS                                                   | 457  | \$1,819 | \$72,778 | 62.3% | 285 | \$20,000 | \$800,000 | 100.0% | 457 | \$100 | \$4,000  | 4.2%  | 19  |
| 9637 | Crenshaw  | Rutledge       | Town of Rutledge                                       | 2    | \$282   | \$11,280 | 11.8% | 0   | \$282    | \$11,280  | 11.8%  | 0   | \$282 | \$11,280 | 11.8% | 0   |
| 9637 | Crenshaw  | Luverne        | The Water Works and Sewer Board of the City of Luverne | 787  | \$265   | \$10,584 | 11.0% | 87  | \$265    | \$10,584  | 11.0%  | 87  | \$265 | \$10,584 | 11.0% | 87  |
| 9637 | Crenshaw  | Glenwood       | The Water Works and Sewer Board of the City of Luverne | 69   | \$265   | \$10,584 | 11.0% | 8   | \$265    | \$10,584  | 11.0%  | 8   | \$265 | \$10,584 | 11.0% | 8   |
| 9638 | Crenshaw  | Unincorporated | OWTS                                                   | 328  | \$1,819 | \$72,778 | 78.1% | 256 | \$20,000 | \$800,000 | 99.9%  | 328 | \$100 | \$4,000  | 5.4%  | 18  |
| 9638 | Crenshaw  | Brantley       | Town of Brantley                                       | 103  | \$192   | \$7,680  | 10.3% | 11  | \$192    | \$7,680   | 10.3%  | 11  | \$192 | \$7,680  | 10.3% | 11  |
| 9638 | Crenshaw  | Dozier         | Town of Dozier                                         | 188  | \$180   | \$7,200  | 9.6%  | 18  | \$180    | \$7,200   | 9.6%   | 18  | \$180 | \$7,200  | 9.6%  | 18  |
| 9639 | Crenshaw  | Unincorporated | OWTS                                                   | 300  | \$1,819 | \$72,778 | 73.5% | 221 | \$20,000 | \$800,000 | 99.8%  | 300 | \$100 | \$4,000  | 4.2%  | 13  |

|      |          |                |                                        |      |       |          |       |     |         |           |        |      |       |          |       |     |
|------|----------|----------------|----------------------------------------|------|-------|----------|-------|-----|---------|-----------|--------|------|-------|----------|-------|-----|
| 9639 | Crenshaw | Brantley       | Town of Brantley                       | 270  | \$192 | \$7,680  | 8.1%  | 22  | \$192   | \$7,680   | 8.1%   | 22   | \$192 | \$7,680  | 8.1%  | 22  |
| 9641 | Cullman  | Unincorporated | OWTS                                   | 2195 | \$530 | \$21,192 | 29.5% | 648 | \$5,000 | \$200,000 | 100.0% | 2195 | \$100 | \$4,000  | 4.0%  | 88  |
| 9641 | Cullman  | Baileyton      | OWTS                                   | 226  | \$530 | \$21,194 | 29.5% | 67  | \$5,000 | \$200,000 | 100.0% | 226  | \$100 | \$4,000  | 4.0%  | 9   |
| 9641 | Cullman  | Arab           | Arab Sewer Board                       | 12   | \$741 | \$29,654 | 43.0% | 5   | \$741   | \$29,654  | 43.0%  | 5    | \$741 | \$29,654 | 43.0% | 5   |
| 9642 | Cullman  | Unincorporated | OWTS                                   | 2540 | \$530 | \$21,192 | 22.3% | 566 | \$5,000 | \$200,000 | 100.0% | 2540 | \$100 | \$4,000  | 2.3%  | 59  |
| 9642 | Cullman  | Fairview       | OWTS                                   | 124  | \$530 | \$21,194 | 22.3% | 28  | \$5,000 | \$200,000 | 100.0% | 124  | \$100 | \$4,000  | 2.3%  | 3   |
| 9642 | Cullman  | Cullman        | City of Cullman                        | 60   | \$894 | \$35,760 | 42.7% | 26  | \$894   | \$35,760  | 42.7%  | 26   | \$894 | \$35,760 | 42.7% | 26  |
| 9643 | Cullman  | Unincorporated | OWTS                                   | 1795 | \$530 | \$21,192 | 8.4%  | 151 | \$5,000 | \$200,000 | 99.9%  | 1795 | \$100 | \$4,000  | 0.4%  | 7   |
| 9643 | Cullman  | Cullman        | City of Cullman                        | 75   | \$894 | \$35,760 | 28.7% | 21  | \$894   | \$35,760  | 28.7%  | 21   | \$894 | \$35,760 | 28.7% | 21  |
| 9643 | Cullman  | South Vinemont | Integra Water Vinemont, LLC            | 26   | \$802 | \$32,069 | 23.4% | 6   | \$802   | \$32,069  | 23.4%  | 6    | \$802 | \$32,069 | 23.4% | 6   |
| 9644 | Cullman  | Unincorporated | OWTS                                   | 1189 | \$530 | \$21,192 | 18.1% | 216 | \$5,000 | \$200,000 | 99.9%  | 1189 | \$100 | \$4,000  | 1.9%  | 22  |
| 9644 | Cullman  | Cullman        | City of Cullman                        | 108  | \$894 | \$35,760 | 35.6% | 39  | \$894   | \$35,760  | 35.6%  | 39   | \$894 | \$35,760 | 35.6% | 39  |
| 9644 | Cullman  | West Point     | Town of West Point                     | 255  | \$444 | \$17,760 | 14.0% | 36  | \$444   | \$17,760  | 14.0%  | 36   | \$444 | \$17,760 | 14.0% | 36  |
| 9645 | Cullman  | Unincorporated | OWTS                                   | 1503 | \$530 | \$21,192 | 20.6% | 310 | \$5,000 | \$200,000 | 100.0% | 1503 | \$100 | \$4,000  | 4.5%  | 67  |
| 9645 | Cullman  | West Point     | Town of West Point                     | 156  | \$444 | \$17,760 | 16.7% | 26  | \$444   | \$17,760  | 16.7%  | 26   | \$444 | \$17,760 | 16.7% | 26  |
| 9646 | Cullman  | Unincorporated | OWTS                                   | 1226 | \$530 | \$21,192 | 15.8% | 194 | \$5,000 | \$200,000 | 99.9%  | 1226 | \$100 | \$4,000  | 1.4%  | 17  |
| 9646 | Cullman  | West Point     | Town of West Point                     | 130  | \$444 | \$17,760 | 11.2% | 14  | \$444   | \$17,760  | 11.2%  | 14   | \$444 | \$17,760 | 11.2% | 14  |
| 9647 | Cullman  | Unincorporated | OWTS                                   | 1344 | \$530 | \$21,192 | 14.2% | 191 | \$5,000 | \$200,000 | 100.0% | 1344 | \$100 | \$4,000  | 1.4%  | 19  |
| 9647 | Cullman  | Cullman        | City of Cullman                        | 356  | \$894 | \$35,760 | 29.0% | 103 | \$894   | \$35,760  | 29.0%  | 103  | \$894 | \$35,760 | 29.0% | 103 |
| 9647 | Cullman  | West Point     | Town of West Point                     | 48   | \$444 | \$17,760 | 10.2% | 5   | \$444   | \$17,760  | 10.2%  | 5    | \$444 | \$17,760 | 10.2% | 5   |
| 9647 | Cullman  | Good Hope      | Living Water Utilities, LLC-Good Hope  | 43   | \$250 | \$10,013 | 3.5%  | 2   | \$250   | \$10,013  | 3.5%   | 2    | \$250 | \$10,013 | 3.5%  | 2   |
| 9648 | Cullman  | Unincorporated | OWTS                                   | 609  | \$530 | \$21,192 | 25.3% | 154 | \$5,000 | \$200,000 | 99.9%  | 609  | \$100 | \$4,000  | 4.3%  | 26  |
| 9648 | Cullman  | Cullman        | City of Cullman                        | 1134 | \$894 | \$35,760 | 42.2% | 479 | \$894   | \$35,760  | 42.2%  | 479  | \$894 | \$35,760 | 42.2% | 479 |
| 9649 | Cullman  | Unincorporated | OWTS                                   | 310  | \$530 | \$21,192 | 18.2% | 57  | \$5,000 | \$200,000 | 100.0% | 310  | \$100 | \$4,000  | 2.7%  | 8   |
| 9649 | Cullman  | Cullman        | City of Cullman                        | 2054 | \$894 | \$35,760 | 31.5% | 646 | \$894   | \$35,760  | 31.5%  | 646  | \$894 | \$35,760 | 31.5% | 646 |
| 9649 | Cullman  | South Vinemont | Integra Water Vinemont, LLC            | 33   | \$802 | \$32,069 | 28.8% | 9   | \$802   | \$32,069  | 28.8%  | 9    | \$802 | \$32,069 | 28.8% | 9   |
| 9650 | Cullman  | Unincorporated | OWTS                                   | 752  | \$530 | \$21,192 | 26.1% | 196 | \$5,000 | \$200,000 | 100.0% | 752  | \$100 | \$4,000  | 3.1%  | 23  |
| 9650 | Cullman  | Cullman        | City of Cullman                        | 1798 | \$894 | \$35,760 | 41.6% | 748 | \$894   | \$35,760  | 41.6%  | 748  | \$894 | \$35,760 | 41.6% | 748 |
| 9650 | Cullman  | Good Hope      | Living Water Utilities, LLC-Good Hope  | 1    | \$250 | \$10,013 | 7.7%  | 0   | \$250   | \$10,013  | 7.7%   | 0    | \$250 | \$10,013 | 7.7%  | 0   |
| 9651 | Cullman  | Unincorporated | OWTS                                   | 1285 | \$530 | \$21,192 | 19.4% | 250 | \$5,000 | \$200,000 | 100.0% | 1285 | \$100 | \$4,000  | 1.6%  | 20  |
| 9651 | Cullman  | Cullman        | City of Cullman                        | 150  | \$894 | \$35,760 | 34.9% | 52  | \$894   | \$35,760  | 34.9%  | 52   | \$894 | \$35,760 | 34.9% | 52  |
| 9651 | Cullman  | Good Hope      | Living Water Utilities, LLC-Good Hope  | 14   | \$250 | \$10,013 | 3.9%  | 1   | \$250   | \$10,013  | 3.9%   | 1    | \$250 | \$10,013 | 3.9%  | 1   |
| 9652 | Cullman  | Unincorporated | OWTS                                   | 898  | \$530 | \$21,192 | 15.0% | 135 | \$5,000 | \$200,000 | 100.0% | 898  | \$100 | \$4,000  | 2.0%  | 18  |
| 9653 | Cullman  | Unincorporated | OWTS                                   | 1545 | \$530 | \$21,192 | 28.3% | 437 | \$5,000 | \$200,000 | 100.0% | 1545 | \$100 | \$4,000  | 5.7%  | 88  |
| 9653 | Cullman  | Holly Pond     | Living Water Utilities, LLC-Holly Pond | 235  | \$228 | \$9,120  | 13.0% | 30  | \$228   | \$9,120   | 13.0%  | 30   | \$228 | \$9,120  | 13.0% | 30  |
| 9654 | Cullman  | Unincorporated | OWTS                                   | 685  | \$530 | \$21,192 | 35.7% | 245 | \$5,000 | \$200,000 | 100.0% | 685  | \$100 | \$4,000  | 5.8%  | 40  |

|        |         |                |                                                                |      |       |          |       |     |         |           |        |      |       |          |       |     |
|--------|---------|----------------|----------------------------------------------------------------|------|-------|----------|-------|-----|---------|-----------|--------|------|-------|----------|-------|-----|
| 9654   | Cullman | Hanceville     | Hanceville Water Works and Sewer Board                         | 473  | \$647 | \$25,896 | 44.2% | 209 | \$647   | \$25,896  | 44.2%  | 209  | \$647 | \$25,896 | 44.2% | 209 |
| 9654   | Cullman | Dodge City     | Living Water Utilities, LLC-Dodge City                         | 69   | \$396 | \$15,840 | 25.2% | 17  | \$396   | \$15,840  | 25.2%  | 17   | \$396 | \$15,840 | 25.2% | 17  |
| 9654   | Cullman | Unincorporated | OWTS                                                           | 777  | \$530 | \$21,192 | 24.3% | 189 | \$5,000 | \$200,000 | 100.0% | 777  | \$100 | \$4,000  | 4.6%  | 36  |
| 9654   | Cullman | Hanceville     | Hanceville Water Works and Sewer Board                         | 704  | \$647 | \$25,896 | 30.7% | 216 | \$647   | \$25,896  | 30.7%  | 216  | \$647 | \$25,896 | 30.7% | 216 |
| 9654   | Cullman | Garden City    | Town of Garden City                                            | 193  | \$354 | \$14,160 | 15.4% | 30  | \$354   | \$14,160  | 15.4%  | 30   | \$354 | \$14,160 | 15.4% | 30  |
| 9655   | Cullman | Unincorporated | OWTS                                                           | 1633 | \$530 | \$21,192 | 21.3% | 348 | \$5,000 | \$200,000 | 100.0% | 1633 | \$100 | \$4,000  | 4.5%  | 74  |
| 9655   | Cullman | Colony         | OWTS                                                           | 60   | \$530 | \$21,194 | 21.3% | 13  | \$5,000 | \$200,000 | 100.0% | 60   | \$100 | \$4,000  | 4.5%  | 3   |
| 9655   | Cullman | Dodge City     | Living Water Utilities, LLC-Dodge City                         | 323  | \$396 | \$15,840 | 16.0% | 52  | \$396   | \$15,840  | 16.0%  | 52   | \$396 | \$15,840 | 16.0% | 52  |
| 9655   | Cullman | Good Hope      | Living Water Utilities, LLC-Good Hope                          | 4    | \$250 | \$10,013 | 11.3% | 0   | \$250   | \$10,013  | 11.3%  | 0    | \$250 | \$10,013 | 11.3% | 0   |
| 9656   | Cullman | Unincorporated | OWTS                                                           | 860  | \$530 | \$21,192 | 12.8% | 110 | \$5,000 | \$200,000 | 99.9%  | 860  | \$100 | \$4,000  | 2.9%  | 25  |
| 9657   | Cullman | Unincorporated | OWTS                                                           | 1024 | \$530 | \$21,192 | 14.6% | 150 | \$5,000 | \$200,000 | 100.0% | 1024 | \$100 | \$4,000  | 1.5%  | 16  |
| 200    | Dale    | Unincorporated | OWTS                                                           | 1295 | \$530 | \$21,192 | 7.2%  | 93  | \$5,000 | \$200,000 | 100.0% | 1295 | \$100 | \$4,000  | 0.6%  | 8   |
| 200    | Dale    | Ozark          | The Utilities Board of the City of Ozark                       | 1    | \$312 | \$12,466 | 1.6%  | 0   | \$312   | \$12,466  | 1.6%   | 0    | \$312 | \$12,466 | 1.6%  | 0   |
| 201    | Dale    | Unincorporated | OWTS                                                           | 1037 | \$530 | \$21,192 | 21.2% | 220 | \$5,000 | \$200,000 | 99.7%  | 1037 | \$100 | \$4,000  | 3.3%  | 34  |
| 201    | Dale    | Ariton         | The Water Works and Sewer Board of the Town of Ariton, Alabama | 294  | \$348 | \$13,920 | 13.3% | 39  | \$348   | \$13,920  | 13.3%  | 39   | \$348 | \$13,920 | 13.3% | 39  |
| 201    | Dale    | Ozark          | The Utilities Board of the City of Ozark                       | 16   | \$312 | \$12,466 | 11.4% | 2   | \$312   | \$12,466  | 11.4%  | 2    | \$312 | \$12,466 | 11.4% | 2   |
| 202    | Dale    | Unincorporated | OWTS                                                           | 879  | \$530 | \$21,192 | 19.6% | 172 | \$5,000 | \$200,000 | 100.0% | 879  | \$100 | \$4,000  | 3.3%  | 29  |
| 203    | Dale    | Unincorporated | OWTS                                                           | 643  | \$530 | \$21,192 | 17.0% | 109 | \$5,000 | \$200,000 | 100.0% | 643  | \$100 | \$4,000  | 1.1%  | 7   |
| 203    | Dale    | Ozark          | The Utilities Board of the City of Ozark                       | 39   | \$312 | \$12,466 | 6.8%  | 3   | \$312   | \$12,466  | 6.8%   | 3    | \$312 | \$12,466 | 6.8%  | 3   |
| 203    | Dale    | Newton         | Newton Water and Sewer Authority                               | 183  | \$276 | \$11,040 | 4.4%  | 8   | \$276   | \$11,040  | 4.4%   | 8    | \$276 | \$11,040 | 4.4%  | 8   |
| 204    | Dale    | Unincorporated | OWTS                                                           | 467  | \$530 | \$21,192 | 14.8% | 69  | \$5,000 | \$200,000 | 99.8%  | 467  | \$100 | \$4,000  | 3.0%  | 14  |
| 204    | Dale    | Ozark          | The Utilities Board of the City of Ozark                       | 531  | \$312 | \$12,466 | 7.5%  | 40  | \$312   | \$12,466  | 7.5%   | 40   | \$312 | \$12,466 | 7.5%  | 40  |
| 205    | Dale    | Unincorporated | OWTS                                                           | 722  | \$530 | \$21,192 | 34.9% | 252 | \$5,000 | \$200,000 | 100.0% | 722  | \$100 | \$4,000  | 8.2%  | 59  |
| 205    | Dale    | Ozark          | The Utilities Board of the City of Ozark                       | 122  | \$312 | \$12,466 | 24.4% | 30  | \$312   | \$12,466  | 24.4%  | 30   | \$312 | \$12,466 | 24.4% | 30  |
| 207    | Dale    | Unincorporated | OWTS                                                           | 1108 | \$530 | \$21,192 | 44.9% | 498 | \$5,000 | \$200,000 | 100.0% | 1108 | \$100 | \$4,000  | 7.4%  | 82  |
| 207    | Dale    | Ozark          | The Utilities Board of the City of Ozark                       | 174  | \$312 | \$12,466 | 23.2% | 40  | \$312   | \$12,466  | 23.2%  | 40   | \$312 | \$12,466 | 23.2% | 40  |
| 208.01 | Dale    | Unincorporated | OWTS                                                           | 1185 | \$530 | \$21,192 | 24.0% | 284 | \$5,000 | \$200,000 | 100.0% | 1185 | \$100 | \$4,000  | 2.6%  | 31  |

|        |        |                |                                                          |      |         |          |       |      |          |           |        |      |       |          |       |     |
|--------|--------|----------------|----------------------------------------------------------|------|---------|----------|-------|------|----------|-----------|--------|------|-------|----------|-------|-----|
| 208.01 | Dale   | Ozark          | The Utilities Board of the City of Ozark                 | 186  | \$312   | \$12,466 | 10.0% | 19   | \$312    | \$12,466  | 10.0%  | 19   | \$312 | \$12,466 | 10.0% | 19  |
| 208.02 | Dale   | Unincorporated | OWTS                                                     | 1407 | \$530   | \$21,192 | 18.7% | 263  | \$5,000  | \$200,000 | 100.0% | 1407 | \$100 | \$4,000  | 3.5%  | 50  |
| 208.02 | Dale   | Ozark          | The Utilities Board of the City of Ozark                 | 303  | \$312   | \$12,466 | 10.2% | 31   | \$312    | \$12,466  | 10.2%  | 31   | \$312 | \$12,466 | 10.2% | 31  |
| 211.01 | Dale   | Unincorporated | OWTS                                                     | 841  | \$530   | \$21,192 | 16.0% | 135  | \$5,000  | \$200,000 | 100.0% | 841  | \$100 | \$4,000  | 2.5%  | 21  |
| 211.01 | Dale   | Level Plains   | Level Plains                                             | 714  | \$214   | \$8,578  | 5.4%  | 39   | \$214    | \$8,578   | 5.4%   | 39   | \$214 | \$8,578  | 5.4%  | 39  |
| 211.01 | Dale   | Daleville      | The Water Works and Sewer Board of the City of Daleville | 32   | \$199   | \$7,958  | 5.0%  | 2    | \$199    | \$7,958   | 5.0%   | 2    | \$199 | \$7,958  | 5.0%  | 2   |
| 211.01 | Dale   | Enterprise     | City of Enterprise                                       | 134  | \$161   | \$6,442  | 4.1%  | 5    | \$161    | \$6,442   | 4.1%   | 5    | \$161 | \$6,442  | 4.1%  | 5   |
| 211.02 | Dale   | Unincorporated | OWTS                                                     | 698  | \$530   | \$21,192 | 24.0% | 168  | \$5,000  | \$200,000 | 100.0% | 698  | \$100 | \$4,000  | 3.9%  | 27  |
| 211.02 | Dale   | Daleville      | The Water Works and Sewer Board of the City of Daleville | 1010 | \$199   | \$7,958  | 7.7%  | 78   | \$199    | \$7,958   | 7.7%   | 78   | \$199 | \$7,958  | 7.7%  | 78  |
| 212    | Dale   | Unincorporated | OWTS                                                     | 311  | \$530   | \$21,192 | 21.7% | 68   | \$5,000  | \$200,000 | 99.9%  | 311  | \$100 | \$4,000  | 2.9%  | 9   |
| 212    | Dale   | Clayhatchee    | OWTS                                                     | 63   | \$530   | \$21,194 | 21.7% | 14   | \$5,000  | \$200,000 | 99.9%  | 63   | \$100 | \$4,000  | 2.9%  | 2   |
| 212    | Dale   | Daleville      | The Water Works and Sewer Board of the City of Daleville | 529  | \$199   | \$7,958  | 5.7%  | 30   | \$199    | \$7,958   | 5.7%   | 30   | \$199 | \$7,958  | 5.7%  | 30  |
| 213    | Dale   | Unincorporated | OWTS                                                     | 510  | \$530   | \$21,192 | 20.1% | 103  | \$5,000  | \$200,000 | 100.0% | 510  | \$100 | \$4,000  | 1.6%  | 8   |
| 213    | Dale   | Pinckard       | OWTS                                                     | 135  | \$530   | \$21,194 | 20.1% | 27   | \$5,000  | \$200,000 | 100.0% | 135  | \$100 | \$4,000  | 1.6%  | 2   |
| 213    | Dale   | Midland City   | Midland City                                             | 199  | \$720   | \$28,800 | 28.1% | 56   | \$720    | \$28,800  | 28.1%  | 56   | \$720 | \$28,800 | 28.1% | 56  |
| 213    | Dale   | Dothan         | City of Dothan                                           | 345  | \$467   | \$18,662 | 16.8% | 58   | \$467    | \$18,662  | 16.8%  | 58   | \$467 | \$18,662 | 16.8% | 58  |
| 213    | Dale   | Newton         | Newton Water and Sewer Authority                         | 433  | \$276   | \$11,040 | 5.7%  | 25   | \$276    | \$11,040  | 5.7%   | 25   | \$276 | \$11,040 | 5.7%  | 25  |
| 213    | Dale   | Daleville      | The Water Works and Sewer Board of the City of Daleville | 75   | \$199   | \$7,958  | 3.3%  | 2    | \$199    | \$7,958   | 3.3%   | 2    | \$199 | \$7,958  | 3.3%  | 2   |
| 214    | Dale   | Unincorporated | OWTS                                                     | 402  | \$530   | \$21,192 | 28.9% | 116  | \$5,000  | \$200,000 | 100.0% | 402  | \$100 | \$4,000  | 3.9%  | 16  |
| 214    | Dale   | Grimes         | OWTS                                                     | 64   | \$530   | \$21,194 | 28.9% | 18   | \$5,000  | \$200,000 | 100.0% | 64   | \$100 | \$4,000  | 3.9%  | 2   |
| 214    | Dale   | Midland City   | Midland City                                             | 689  | \$720   | \$28,800 | 42.2% | 291  | \$720    | \$28,800  | 42.2%  | 291  | \$720 | \$28,800 | 42.2% | 291 |
| 214    | Dale   | Napier Field   | Napier Field                                             | 160  | \$504   | \$20,160 | 27.2% | 44   | \$504    | \$20,160  | 27.2%  | 44   | \$504 | \$20,160 | 27.2% | 44  |
| 214    | Dale   | Dothan         | City of Dothan                                           | 855  | \$467   | \$18,662 | 24.8% | 212  | \$467    | \$18,662  | 24.8%  | 212  | \$467 | \$18,662 | 24.8% | 212 |
| 214    | Dale   | Newton         | Newton Water and Sewer Authority                         | 14   | \$276   | \$11,040 | 11.6% | 2    | \$276    | \$11,040  | 11.6%  | 2    | \$276 | \$11,040 | 11.6% | 2   |
| 9561   | Dallas | Unincorporated | OWTS                                                     | 1756 | \$1,819 | \$72,778 | 60.6% | 1064 | \$20,000 | \$800,000 | 100.0% | 1756 | \$100 | \$4,000  | 4.3%  | 76  |
| 9561   | Dallas | Valley Grande  | City of Valley Grande                                    | 40   | \$420   | \$16,800 | 14.7% | 6    | \$420    | \$16,800  | 14.7%  | 6    | \$420 | \$16,800 | 14.7% | 6   |
| 9561   | Dallas | Selma          | The Waterworks and Sewer Board of the City of Selma      | 627  | \$252   | \$10,075 | 10.8% | 68   | \$252    | \$10,075  | 10.8%  | 68   | \$252 | \$10,075 | 10.8% | 68  |
| 9562   | Dallas | Unincorporated | OWTS                                                     | 949  | \$1,819 | \$72,778 | 62.3% | 591  | \$20,000 | \$800,000 | 100.0% | 949  | \$100 | \$4,000  | 7.1%  | 67  |
| 9562   | Dallas | Unincorporated | OWTS                                                     | 801  | \$1,819 | \$72,778 | 66.9% | 535  | \$20,000 | \$800,000 | 100.0% | 801  | \$100 | \$4,000  | 2.9%  | 23  |



|      |        |                      |                                                     |      |         |          |       |     |          |           |        |     |       |          |       |     |
|------|--------|----------------------|-----------------------------------------------------|------|---------|----------|-------|-----|----------|-----------|--------|-----|-------|----------|-------|-----|
| 9562 | Dallas | Valley Grande        | City of Valley Grande                               | 50   | \$420   | \$16,800 | 14.4% | 7   | \$420    | \$16,800  | 14.4%  | 7   | \$420 | \$16,800 | 14.4% | 7   |
| 9563 | Dallas | Unincorporated       | OWTS                                                | 611  | \$1,819 | \$72,778 | 81.1% | 496 | \$20,000 | \$800,000 | 100.0% | 611 | \$100 | \$4,000  | 8.2%  | 50  |
| 9563 | Dallas | Valley Grande        | City of Valley Grande                               | 8    | \$420   | \$16,800 | 30.1% | 3   | \$420    | \$16,800  | 30.1%  | 3   | \$420 | \$16,800 | 30.1% | 3   |
| 9563 | Dallas | Selma                | The Waterworks and Sewer Board of the City of Selma | 946  | \$252   | \$10,075 | 20.7% | 196 | \$252    | \$10,075  | 20.7%  | 196 | \$252 | \$10,075 | 20.7% | 196 |
| 9564 | Dallas | Unincorporated       | OWTS                                                | 87   | \$1,819 | \$72,778 | 95.4% | 83  | \$20,000 | \$800,000 | 100.0% | 87  | \$100 | \$4,000  | 11.3% | 10  |
| 9564 | Dallas | Selma                | The Waterworks and Sewer Board of the City of Selma | 1065 | \$252   | \$10,075 | 28.4% | 303 | \$252    | \$10,075  | 28.4%  | 303 | \$252 | \$10,075 | 28.4% | 303 |
| 9565 | Dallas | Unincorporated       | OWTS                                                | 19   | \$1,819 | \$72,778 | 95.5% | 18  | \$20,000 | \$800,000 | 99.9%  | 19  | \$100 | \$4,000  | 10.2% | 2   |
| 9565 | Dallas | Selma                | The Waterworks and Sewer Board of the City of Selma | 1367 | \$252   | \$10,075 | 25.9% | 354 | \$252    | \$10,075  | 25.9%  | 354 | \$252 | \$10,075 | 25.9% | 354 |
| 9566 | Dallas | Selma                | The Waterworks and Sewer Board of the City of Selma | 1051 | \$252   | \$10,075 | 12.1% | 128 | \$252    | \$10,075  | 12.1%  | 128 | \$252 | \$10,075 | 12.1% | 128 |
| 9567 | Dallas | Unincorporated       | OWTS                                                | 29   | \$1,819 | \$72,778 | 57.7% | 16  | \$20,000 | \$800,000 | 99.9%  | 29  | \$100 | \$4,000  | 2.0%  | 1   |
| 9567 | Dallas | Selma                | The Waterworks and Sewer Board of the City of Selma | 791  | \$252   | \$10,075 | 5.0%  | 40  | \$252    | \$10,075  | 5.0%   | 40  | \$252 | \$10,075 | 5.0%  | 40  |
| 9567 | Dallas | Selma                | The Waterworks and Sewer Board of the City of Selma | 649  | \$252   | \$10,075 | 7.5%  | 49  | \$252    | \$10,075  | 7.5%   | 49  | \$252 | \$10,075 | 7.5%  | 49  |
| 9568 | Dallas | Unincorporated       | OWTS                                                | 30   | \$1,819 | \$72,778 | 78.1% | 23  | \$20,000 | \$800,000 | 100.0% | 30  | \$100 | \$4,000  | 8.5%  | 3   |
| 9568 | Dallas | Selma                | The Waterworks and Sewer Board of the City of Selma | 884  | \$252   | \$10,075 | 21.3% | 189 | \$252    | \$10,075  | 21.3%  | 189 | \$252 | \$10,075 | 21.3% | 189 |
| 9569 | Dallas | Unincorporated       | OWTS                                                | 972  | \$1,819 | \$72,778 | 85.5% | 830 | \$20,000 | \$800,000 | 99.9%  | 972 | \$100 | \$4,000  | 6.9%  | 67  |
| 9569 | Dallas | Orrville             | Dallas County Commission-Delwood Lagoon             | 78   | \$24    | \$960    | 1.7%  | 1   | \$24     | \$960     | 1.7%   | 1   | \$24  | \$960    | 1.7%  | 1   |
| 9570 | Dallas | Unincorporated       | OWTS                                                | 489  | \$1,819 | \$72,778 | 78.7% | 385 | \$20,000 | \$800,000 | 100.0% | 489 | \$100 | \$4,000  | 2.1%  | 10  |
| 9571 | Dallas | Unincorporated       | OWTS                                                | 563  | \$1,819 | \$72,778 | 82.8% | 466 | \$20,000 | \$800,000 | 99.9%  | 563 | \$100 | \$4,000  | 3.3%  | 19  |
| 9572 | Dallas | Selmont-West Selmont | Dallas County Water and Sewer Authority             | 534  | \$479   | \$19,152 | 31.8% | 170 | \$479    | \$19,152  | 31.8%  | 170 | \$479 | \$19,152 | 31.8% | 170 |
| 9572 | Dallas | Selma                | The Waterworks and Sewer Board of the City of Selma | 50   | \$252   | \$10,075 | 17.2% | 9   | \$252    | \$10,075  | 17.2%  | 9   | \$252 | \$10,075 | 17.2% | 9   |
| 9573 | Dallas | Selmont-West Selmont | Dallas County Water and Sewer Authority             | 1444 | \$479   | \$19,152 | 26.8% | 386 | \$479    | \$19,152  | 26.8%  | 386 | \$479 | \$19,152 | 26.8% | 386 |

|      |        |                |                                                         |      |       |          |       |     |         |           |        |      |       |          |       |    |
|------|--------|----------------|---------------------------------------------------------|------|-------|----------|-------|-----|---------|-----------|--------|------|-------|----------|-------|----|
| 9573 | Dallas | Selma          | The Waterworks and Sewer Board of the City of Selma     | 19   | \$252 | \$10,075 | 13.4% | 3   | \$252   | \$10,075  | 13.4%  | 3    | \$252 | \$10,075 | 13.4% | 3  |
| 9601 | DeKalb | Unincorporated | OWTS                                                    | 2085 | \$530 | \$21,192 | 20.6% | 429 | \$5,000 | \$200,000 | 99.9%  | 2085 | \$100 | \$4,000  | 3.0%  | 63 |
| 9601 | DeKalb | Ider           | OWTS                                                    | 156  | \$530 | \$21,194 | 20.6% | 32  | \$5,000 | \$200,000 | 99.9%  | 156  | \$100 | \$4,000  | 3.0%  | 5  |
| 9601 | DeKalb | Henagar        | City of Henagar                                         | 3    | \$608 | \$24,331 | 25.3% | 1   | \$608   | \$24,331  | 25.3%  | 1    | \$608 | \$24,331 | 25.3% | 1  |
| 9602 | DeKalb | Unincorporated | OWTS                                                    | 1237 | \$530 | \$21,192 | 25.2% | 312 | \$5,000 | \$200,000 | 100.0% | 1237 | \$100 | \$4,000  | 2.3%  | 28 |
| 9602 | DeKalb | Henagar        | City of Henagar                                         | 33   | \$608 | \$24,331 | 30.8% | 10  | \$608   | \$24,331  | 30.8%  | 10   | \$608 | \$24,331 | 30.8% | 10 |
| 9603 | DeKalb | Unincorporated | OWTS                                                    | 2298 | \$530 | \$21,192 | 32.3% | 741 | \$5,000 | \$200,000 | 100.0% | 2298 | \$100 | \$4,000  | 4.1%  | 95 |
| 9603 | DeKalb | Shiloh         | OWTS                                                    | 27   | \$530 | \$21,194 | 32.3% | 9   | \$5,000 | \$200,000 | 100.0% | 27   | \$100 | \$4,000  | 4.1%  | 1  |
| 9603 | DeKalb | Sylvania       | Sylvania                                                | 37   | \$608 | \$24,331 | 37.2% | 14  | \$608   | \$24,331  | 37.2%  | 14   | \$608 | \$24,331 | 37.2% | 14 |
| 9603 | DeKalb | Powell         | Waterworks Board of Section & Dutton- City of Powell    | 39   | \$589 | \$23,549 | 35.9% | 14  | \$589   | \$23,549  | 35.9%  | 14   | \$589 | \$23,549 | 35.9% | 14 |
| 9603 | DeKalb | Rainsville     | City of Rainsville                                      | 260  | \$264 | \$10,560 | 11.7% | 30  | \$264   | \$10,560  | 11.7%  | 30   | \$264 | \$10,560 | 11.7% | 30 |
| 9604 | DeKalb | Unincorporated | OWTS                                                    | 1955 | \$530 | \$21,192 | 19.9% | 388 | \$5,000 | \$200,000 | 99.9%  | 1955 | \$100 | \$4,000  | 4.6%  | 89 |
| 9604 | DeKalb | Shiloh         | OWTS                                                    | 24   | \$530 | \$21,194 | 19.9% | 5   | \$5,000 | \$200,000 | 99.9%  | 24   | \$100 | \$4,000  | 4.6%  | 1  |
| 9604 | DeKalb | Sylvania       | Sylvania                                                | 22   | \$608 | \$24,331 | 22.9% | 5   | \$608   | \$24,331  | 22.9%  | 5    | \$608 | \$24,331 | 22.9% | 5  |
| 9604 | DeKalb | Rainsville     | City of Rainsville                                      | 309  | \$264 | \$10,560 | 11.7% | 36  | \$264   | \$10,560  | 11.7%  | 36   | \$264 | \$10,560 | 11.7% | 36 |
| 9605 | DeKalb | Unincorporated | OWTS                                                    | 1974 | \$530 | \$21,192 | 18.3% | 362 | \$5,000 | \$200,000 | 100.0% | 1974 | \$100 | \$4,000  | 1.8%  | 36 |
| 9605 | DeKalb | Shiloh         | OWTS                                                    | 18   | \$530 | \$21,194 | 18.3% | 3   | \$5,000 | \$200,000 | 100.0% | 18   | \$100 | \$4,000  | 1.8%  | 0  |
| 9605 | DeKalb | Lakeview       | OWTS                                                    | 16   | \$530 | \$21,194 | 18.3% | 3   | \$5,000 | \$200,000 | 100.0% | 16   | \$100 | \$4,000  | 1.8%  | 0  |
| 9605 | DeKalb | Fyffe          | City of Rainsville                                      | 118  | \$264 | \$10,560 | 5.2%  | 6   | \$264   | \$10,560  | 5.2%   | 6    | \$264 | \$10,560 | 5.2%  | 6  |
| 9606 | DeKalb | Unincorporated | OWTS                                                    | 2128 | \$530 | \$21,192 | 28.1% | 597 | \$5,000 | \$200,000 | 100.0% | 2128 | \$100 | \$4,000  | 3.5%  | 75 |
| 9606 | DeKalb | Geraldine      | OWTS                                                    | 106  | \$530 | \$21,194 | 28.1% | 30  | \$5,000 | \$200,000 | 100.0% | 106  | \$100 | \$4,000  | 3.5%  | 4  |
| 9607 | DeKalb | Unincorporated | OWTS                                                    | 2392 | \$530 | \$21,192 | 23.5% | 563 | \$5,000 | \$200,000 | 100.0% | 2392 | \$100 | \$4,000  | 3.0%  | 73 |
| 9607 | DeKalb | Crossville     | OWTS                                                    | 399  | \$530 | \$21,194 | 23.5% | 94  | \$5,000 | \$200,000 | 100.0% | 399  | \$100 | \$4,000  | 3.0%  | 12 |
| 9608 | DeKalb | Unincorporated | OWTS                                                    | 1492 | \$530 | \$21,192 | 32.2% | 481 | \$5,000 | \$200,000 | 99.9%  | 1492 | \$100 | \$4,000  | 5.9%  | 88 |
| 9608 | DeKalb | Sand Rock      | OWTS                                                    | 4    | \$530 | \$21,194 | 32.2% | 1   | \$5,000 | \$200,000 | 99.9%  | 4    | \$100 | \$4,000  | 5.9%  | 0  |
| 9608 | DeKalb | Collinsville   | Water Works and Sewer Board of the Town of Collinsville | 137  | \$174 | \$6,960  | 10.3% | 14  | \$174   | \$6,960   | 10.3%  | 14   | \$174 | \$6,960  | 10.3% | 14 |
| 9609 | DeKalb | Unincorporated | OWTS                                                    | 1034 | \$530 | \$21,192 | 26.0% | 269 | \$5,000 | \$200,000 | 100.0% | 1034 | \$100 | \$4,000  | 3.6%  | 37 |
| 9609 | DeKalb | Pine Ridge     | OWTS                                                    | 5    | \$530 | \$21,194 | 26.0% | 1   | \$5,000 | \$200,000 | 100.0% | 5    | \$100 | \$4,000  | 3.6%  | 0  |
| 9609 | DeKalb | Fort Payne     | Fort Payne Water Works Board                            | 452  | \$382 | \$15,288 | 17.1% | 77  | \$382   | \$15,288  | 17.1%  | 77   | \$382 | \$15,288 | 17.1% | 77 |
| 9610 | DeKalb | Unincorporated | OWTS                                                    | 1063 | \$530 | \$21,192 | 24.0% | 255 | \$5,000 | \$200,000 | 100.0% | 1063 | \$100 | \$4,000  | 3.0%  | 31 |
| 9610 | DeKalb | Fort Payne     | Fort Payne Water Works Board                            | 530  | \$382 | \$15,288 | 16.3% | 86  | \$382   | \$15,288  | 16.3%  | 86   | \$382 | \$15,288 | 16.3% | 86 |
| 9611 | DeKalb | Unincorporated | OWTS                                                    | 310  | \$530 | \$21,192 | 19.9% | 62  | \$5,000 | \$200,000 | 100.0% | 310  | \$100 | \$4,000  | 2.0%  | 6  |
| 9611 | DeKalb | Pine Ridge     | OWTS                                                    | 90   | \$530 | \$21,194 | 19.9% | 18  | \$5,000 | \$200,000 | 100.0% | 90   | \$100 | \$4,000  | 2.0%  | 2  |

|        |        |                |                                                         |      |       |          |       |     |         |           |        |      |       |          |       |     |
|--------|--------|----------------|---------------------------------------------------------|------|-------|----------|-------|-----|---------|-----------|--------|------|-------|----------|-------|-----|
| 9611   | DeKalb | Fort Payne     | Fort Payne Water Works Board                            | 668  | \$382 | \$15,288 | 11.9% | 79  | \$382   | \$15,288  | 11.9%  | 79   | \$382 | \$15,288 | 11.9% | 79  |
| 9612   | DeKalb | Unincorporated | OWTS                                                    | 226  | \$530 | \$21,192 | 12.7% | 29  | \$5,000 | \$200,000 | 100.0% | 226  | \$100 | \$4,000  | 1.2%  | 3   |
| 9612   | DeKalb | Hammondville   | OWTS                                                    | 2    | \$530 | \$21,194 | 12.7% | 0   | \$5,000 | \$200,000 | 100.0% | 2    | \$100 | \$4,000  | 1.2%  | 0   |
| 9612   | DeKalb | Fort Payne     | Fort Payne Water Works Board                            | 625  | \$382 | \$15,288 | 6.6%  | 41  | \$382   | \$15,288  | 6.6%   | 41   | \$382 | \$15,288 | 6.6%  | 41  |
| 9613   | DeKalb | Unincorporated | OWTS                                                    | 934  | \$530 | \$21,192 | 37.7% | 352 | \$5,000 | \$200,000 | 100.0% | 934  | \$100 | \$4,000  | 5.8%  | 54  |
| 9613   | DeKalb | Fort Payne     | Fort Payne Water Works Board                            | 1186 | \$382 | \$15,288 | 24.7% | 293 | \$382   | \$15,288  | 24.7%  | 293  | \$382 | \$15,288 | 24.7% | 293 |
| 9614   | DeKalb | Unincorporated | OWTS                                                    | 1401 | \$530 | \$21,192 | 26.3% | 368 | \$5,000 | \$200,000 | 100.0% | 1401 | \$100 | \$4,000  | 4.4%  | 61  |
| 9614   | DeKalb | Hammondville   | OWTS                                                    | 84   | \$530 | \$21,194 | 26.3% | 22  | \$5,000 | \$200,000 | 100.0% | 84   | \$100 | \$4,000  | 4.4%  | 4   |
| 9614   | DeKalb | Mentone        | OWTS                                                    | 81   | \$530 | \$21,194 | 26.3% | 21  | \$5,000 | \$200,000 | 100.0% | 81   | \$100 | \$4,000  | 4.4%  | 4   |
| 9614   | DeKalb | Valley Head    | OWTS                                                    | 60   | \$530 | \$21,194 | 26.3% | 16  | \$5,000 | \$200,000 | 100.0% | 60   | \$100 | \$4,000  | 4.4%  | 3   |
| 9614   | DeKalb | Fort Payne     | Fort Payne Water Works Board                            | 20   | \$382 | \$15,288 | 16.1% | 3   | \$382   | \$15,288  | 16.1%  | 3    | \$382 | \$15,288 | 16.1% | 3   |
| 301    | Elmore | Unincorporated | OWTS                                                    | 2410 | \$530 | \$21,192 | 15.3% | 387 | \$5,000 | \$200,000 | 99.9%  | 2527 | \$100 | \$4,000  | 2.2%  | 55  |
| 301    | Elmore | Deatsville     | OWTS                                                    | 117  | \$530 | \$21,194 | 15.3% | 18  | \$5,000 | \$200,000 | 99.9%  | 117  | \$100 | \$4,000  | 2.2%  | 3   |
| 302    | Elmore | Unincorporated | OWTS                                                    | 1655 | \$530 | \$21,192 | 11.0% | 183 | \$5,000 | \$200,000 | 100.0% | 1655 | \$100 | \$4,000  | 1.2%  | 19  |
| 303    | Elmore | Unincorporated | OWTS                                                    | 1160 | \$530 | \$21,192 | 12.5% | 145 | \$5,000 | \$200,000 | 99.9%  | 1160 | \$100 | \$4,000  | 1.4%  | 16  |
| 304    | Elmore | Unincorporated | OWTS                                                    | 1717 | \$530 | \$21,192 | 21.9% | 376 | \$5,000 | \$200,000 | 100.0% | 1717 | \$100 | \$4,000  | 5.2%  | 89  |
| 304    | Elmore | Tallassee      | City of Tallassee                                       | 1251 | \$271 | \$10,848 | 13.4% | 168 | \$271   | \$10,848  | 13.4%  | 168  | \$271 | \$10,848 | 13.4% | 168 |
| 305    | Elmore | Unincorporated | OWTS                                                    | 1285 | \$530 | \$21,192 | 16.7% | 215 | \$5,000 | \$200,000 | 99.9%  | 1285 | \$100 | \$4,000  | 1.5%  | 19  |
| 305    | Elmore | Eclectic       | Town of Eclectic                                        | 506  | \$366 | \$14,640 | 6.7%  | 34  | \$366   | \$14,640  | 6.7%   | 34   | \$366 | \$14,640 | 6.7%  | 34  |
| 306    | Elmore | Unincorporated | OWTS                                                    | 1697 | \$530 | \$21,192 | 24.9% | 422 | \$5,000 | \$200,000 | 100.0% | 1697 | \$100 | \$4,000  | 3.2%  | 54  |
| 306    | Elmore | Wetumpka       | The Water Works and Sewer Board of the City of Wetumpka | 696  | \$478 | \$19,104 | 22.7% | 158 | \$478   | \$19,104  | 22.7%  | 158  | \$478 | \$19,104 | 22.7% | 158 |
| 307.01 | Elmore | Unincorporated | OWTS                                                    | 2583 | \$530 | \$21,192 | 2.2%  | 58  | \$5,000 | \$200,000 | 100.0% | 2583 | \$100 | \$4,000  | 0.2%  | 5   |
| 307.01 | Elmore | Wetumpka       | The Water Works and Sewer Board of the City of Wetumpka | 72   | \$478 | \$19,104 | 1.6%  | 1   | \$478   | \$19,104  | 1.6%   | 1    | \$478 | \$19,104 | 1.6%  | 1   |
| 307.02 | Elmore | Unincorporated | OWTS                                                    | 642  | \$530 | \$21,192 | 5.8%  | 37  | \$5,000 | \$200,000 | 100.0% | 642  | \$100 | \$4,000  | 1.5%  | 9   |
| 307.02 | Elmore | Wetumpka       | The Water Works and Sewer Board of the City of Wetumpka | 822  | \$478 | \$19,104 | 5.5%  | 45  | \$478   | \$19,104  | 5.5%   | 45   | \$478 | \$19,104 | 5.5%  | 45  |
| 308    | Elmore | Unincorporated | OWTS                                                    | 1341 | \$530 | \$21,192 | 13.8% | 186 | \$5,000 | \$200,000 | 100.0% | 1341 | \$100 | \$4,000  | 2.2%  | 30  |
| 308    | Elmore | Wetumpka       | The Water Works and Sewer Board of the City of Wetumpka | 1240 | \$478 | \$19,104 | 12.3% | 152 | \$478   | \$19,104  | 12.3%  | 152  | \$478 | \$19,104 | 12.3% | 152 |
| 309.01 | Elmore | Unincorporated | OWTS                                                    | 463  | \$530 | \$21,192 | 5.6%  | 26  | \$5,000 | \$200,000 | 100.0% | 463  | \$100 | \$4,000  | 0.5%  | 2   |
| 309.01 | Elmore | Deatsville     | OWTS                                                    | 301  | \$530 | \$21,194 | 5.6%  | 17  | \$5,000 | \$200,000 | 100.0% | 301  | \$100 | \$4,000  | 0.5%  | 2   |
| 309.01 | Elmore | Elmore         | Bio-Flow                                                | 29   | \$609 | \$24,350 | 7.3%  | 2   | \$609   | \$24,350  | 7.3%   | 2    | \$609 | \$24,350 | 7.3%  | 2   |
| 309.01 | Elmore | Millbrook      | City of Millbrook                                       | 1262 | \$288 | \$11,520 | 1.5%  | 19  | \$288   | \$11,520  | 1.5%   | 19   | \$288 | \$11,520 | 1.5%  | 19  |

|        |          |                |                                                   |      |       |          |       |     |         |           |        |      |       |          |       |     |
|--------|----------|----------------|---------------------------------------------------|------|-------|----------|-------|-----|---------|-----------|--------|------|-------|----------|-------|-----|
| 309.02 | Elmore   | Unincorporated | OWTS                                              | 878  | \$530 | \$21,192 | 14.5% | 127 | \$5,000 | \$200,000 | 100.0% | 878  | \$100 | \$4,000  | 1.5%  | 13  |
| 309.02 | Elmore   | Coosada        | OWTS                                              | 22   | \$530 | \$21,194 | 14.5% | 3   | \$5,000 | \$200,000 | 100.0% | 22   | \$100 | \$4,000  | 1.5%  | 0   |
| 309.02 | Elmore   | Elmore         | Bio-Flow                                          | 396  | \$609 | \$24,350 | 16.6% | 66  | \$609   | \$24,350  | 16.6%  | 66   | \$609 | \$24,350 | 16.6% | 66  |
| 309.02 | Elmore   | Millbrook      | City of Millbrook                                 | 242  | \$288 | \$11,520 | 5.8%  | 14  | \$288   | \$11,520  | 5.8%   | 14   | \$288 | \$11,520 | 5.8%  | 14  |
| 310    | Elmore   | Unincorporated | OWTS                                              | 263  | \$530 | \$21,192 | 23.6% | 62  | \$5,000 | \$200,000 | 100.0% | 263  | \$100 | \$4,000  | 3.7%  | 10  |
| 310    | Elmore   | Millbrook      | City of Millbrook                                 | 2663 | \$288 | \$11,520 | 11.1% | 295 | \$288   | \$11,520  | 11.1%  | 295  | \$288 | \$11,520 | 11.1% | 295 |
| 311    | Elmore   | Coosada        | OWTS                                              | 70   | \$530 | \$21,194 | 14.5% | 10  | \$5,000 | \$200,000 | 99.9%  | 70   | \$100 | \$4,000  | 2.0%  | 1   |
| 311    | Elmore   | Millbrook      | City of Millbrook                                 | 1474 | \$288 | \$11,520 | 5.9%  | 87  | \$288   | \$11,520  | 5.9%   | 87   | \$288 | \$11,520 | 5.9%  | 87  |
| 312    | Elmore   | Coosada        | OWTS                                              | 188  | \$530 | \$21,194 | 34.0% | 64  | \$5,000 | \$200,000 | 100.0% | 188  | \$100 | \$4,000  | 4.0%  | 8   |
| 312    | Elmore   | Elmore         | Bio-Flow                                          | 99   | \$609 | \$24,350 | 40.0% | 40  | \$609   | \$24,350  | 40.0%  | 40   | \$609 | \$24,350 | 40.0% | 40  |
| 312    | Elmore   | Millbrook      | City of Millbrook                                 | 334  | \$288 | \$11,520 | 13.7% | 46  | \$288   | \$11,520  | 13.7%  | 46   | \$288 | \$11,520 | 13.7% | 46  |
| 313    | Elmore   | Prattville     | City of Prattville                                | 1203 | \$395 | \$15,792 | 10.0% | 121 | \$395   | \$15,792  | 10.0%  | 121  | \$395 | \$15,792 | 10.0% | 121 |
| 313    | Elmore   | Millbrook      | City of Millbrook                                 | 626  | \$288 | \$11,520 | 6.8%  | 42  | \$288   | \$11,520  | 6.8%   | 42   | \$288 | \$11,520 | 6.8%  | 42  |
| 9698   | Escambia | Unincorporated | OWTS                                              | 1216 | \$530 | \$21,192 | 31.0% | 377 | \$5,000 | \$200,000 | 100.0% | 1216 | \$100 | \$4,000  | 5.3%  | 65  |
| 9698   | Escambia | Riverview      | OWTS                                              | 9    | \$530 | \$21,194 | 31.0% | 3   | \$5,000 | \$200,000 | 100.0% | 9    | \$100 | \$4,000  | 5.3%  | 0   |
| 9698   | Escambia | Brewton        | City of Brewton                                   | 13   | \$486 | \$19,440 | 28.4% | 4   | \$486   | \$19,440  | 28.4%  | 4    | \$486 | \$19,440 | 28.4% | 4   |
| 9698   | Escambia | East Brewton   | The Water Works Board of the Town of East Brewton | 980  | \$240 | \$9,600  | 12.8% | 125 | \$240   | \$9,600   | 12.8%  | 125  | \$240 | \$9,600  | 12.8% | 125 |
| 9699   | Escambia | Unincorporated | OWTS                                              | 473  | \$530 | \$21,192 | 22.7% | 107 | \$5,000 | \$200,000 | 100.0% | 473  | \$100 | \$4,000  | 5.0%  | 24  |
| 9699   | Escambia | Pollard        | OWTS                                              | 13   | \$530 | \$21,194 | 22.7% | 3   | \$5,000 | \$200,000 | 100.0% | 13   | \$100 | \$4,000  | 5.0%  | 1   |
| 9699   | Escambia | Brewton        | City of Brewton                                   | 973  | \$486 | \$19,440 | 21.0% | 204 | \$486   | \$19,440  | 21.0%  | 204  | \$486 | \$19,440 | 21.0% | 204 |
| 9701   | Escambia | Unincorporated | OWTS                                              | 616  | \$530 | \$21,192 | 19.1% | 118 | \$5,000 | \$200,000 | 100.0% | 616  | \$100 | \$4,000  | 2.6%  | 16  |
| 9701   | Escambia | Brewton        | City of Brewton                                   | 1151 | \$486 | \$19,440 | 17.0% | 196 | \$486   | \$19,440  | 17.0%  | 196  | \$486 | \$19,440 | 17.0% | 196 |
| 9702   | Escambia | Unincorporated | OWTS                                              | 14   | \$530 | \$21,192 | 45.4% | 6   | \$5,000 | \$200,000 | 99.9%  | 14   | \$100 | \$4,000  | 8.7%  | 1   |
| 9702   | Escambia | Brewton        | City of Brewton                                   | 608  | \$486 | \$19,440 | 43.1% | 262 | \$486   | \$19,440  | 43.1%  | 262  | \$486 | \$19,440 | 43.1% | 262 |
| 9703   | Escambia | Unincorporated | OWTS                                              | 806  | \$530 | \$21,192 | 33.0% | 266 | \$5,000 | \$200,000 | 99.9%  | 806  | \$100 | \$4,000  | 6.5%  | 53  |
| 9703   | Escambia | Flomaton       | Town of Flomaton                                  | 565  | \$479 | \$19,157 | 30.7% | 173 | \$479   | \$19,157  | 30.7%  | 173  | \$479 | \$19,157 | 30.7% | 173 |
| 9704   | Escambia | Atmore         | West Escambia Utilities, Inc.                     | 45   | \$537 | \$21,485 | 28.7% | 13  | \$537   | \$21,485  | 28.7%  | 13   | \$537 | \$21,485 | 28.7% | 13  |
| 9704   | Escambia |                | Poarch Creek Indians Utility Authority            | 980  | \$252 | \$10,080 | 13.9% | 137 | \$252   | \$10,080  | 13.9%  | 137  | \$252 | \$10,080 | 13.9% | 137 |
| 9705   | Escambia | Unincorporated | OWTS                                              | 246  | \$530 | \$21,192 | 31.4% | 77  | \$5,000 | \$200,000 | 100.0% | 246  | \$100 | \$4,000  | 3.7%  | 9   |
| 9705   | Escambia | Atmore         | West Escambia Utilities, Inc.                     | 1474 | \$537 | \$21,485 | 31.9% | 469 | \$537   | \$21,485  | 31.9%  | 469  | \$537 | \$21,485 | 31.9% | 469 |
| 9706   | Escambia | Unincorporated | OWTS                                              | 648  | \$530 | \$21,192 | 40.4% | 262 | \$5,000 | \$200,000 | 100.0% | 648  | \$100 | \$4,000  | 7.8%  | 51  |
| 9706   | Escambia | Atmore         | West Escambia Utilities, Inc.                     | 778  | \$537 | \$21,485 | 40.9% | 318 | \$537   | \$21,485  | 40.9%  | 318  | \$537 | \$21,485 | 40.9% | 318 |
| 9707   | Escambia | Unincorporated | OWTS                                              | 580  | \$530 | \$21,192 | 30.2% | 175 | \$5,000 | \$200,000 | 99.9%  | 580  | \$100 | \$4,000  | 7.9%  | 46  |
| 9707   | Escambia | Atmore         | West Escambia Utilities, Inc.                     | 900  | \$537 | \$21,485 | 30.5% | 275 | \$537   | \$21,485  | 30.5%  | 275  | \$537 | \$21,485 | 30.5% | 275 |

|    |        |                |                                                      |      |       |          |       |     |         |           |        |     |       |          |       |     |
|----|--------|----------------|------------------------------------------------------|------|-------|----------|-------|-----|---------|-----------|--------|-----|-------|----------|-------|-----|
| 2  | Etowah | Gadsden        | The Water Works & Sewer Board of the City of Gadsden | 1193 | \$361 | \$14,448 | 26.6% | 318 | \$361   | \$14,448  | 26.6%  | 318 | \$361 | \$14,448 | 26.6% | 318 |
| 3  | Etowah | Unincorporated | OWTS                                                 | 188  | \$530 | \$21,192 | 50.3% | 94  | \$5,000 | \$200,000 | 100.0% | 188 | \$100 | \$4,000  | 11.9% | 22  |
| 3  | Etowah | Gadsden        | The Water Works & Sewer Board of the City of Gadsden | 839  | \$361 | \$14,448 | 37.4% | 314 | \$361   | \$14,448  | 37.4%  | 314 | \$361 | \$14,448 | 37.4% | 314 |
| 4  | Etowah | Gadsden        | The Water Works & Sewer Board of the City of Gadsden | 1571 | \$361 | \$14,448 | 10.1% | 159 | \$361   | \$14,448  | 10.1%  | 159 | \$361 | \$14,448 | 10.1% | 159 |
| 5  | Etowah | Gadsden        | The Water Works & Sewer Board of the City of Gadsden | 695  | \$361 | \$14,448 | 14.6% | 101 | \$361   | \$14,448  | 14.6%  | 101 | \$361 | \$14,448 | 14.6% | 101 |
| 6  | Etowah | Gadsden        | The Water Works & Sewer Board of the City of Gadsden | 655  | \$361 | \$14,448 | 18.9% | 124 | \$361   | \$14,448  | 18.9%  | 124 | \$361 | \$14,448 | 18.9% | 124 |
| 6  | Etowah | Attalla        | City of Attalla                                      | 126  | \$218 | \$8,712  | 6.3%  | 8   | \$218   | \$8,712   | 6.3%   | 8   | \$218 | \$8,712  | 6.3%  | 8   |
| 7  | Etowah | Gadsden        | The Water Works & Sewer Board of the City of Gadsden | 500  | \$361 | \$14,448 | 49.8% | 249 | \$361   | \$14,448  | 49.8%  | 249 | \$361 | \$14,448 | 49.8% | 249 |
| 8  | Etowah | Gadsden        | The Water Works & Sewer Board of the City of Gadsden | 411  | \$361 | \$14,448 | 25.0% | 103 | \$361   | \$14,448  | 25.0%  | 103 | \$361 | \$14,448 | 25.0% | 103 |
| 9  | Etowah | Gadsden        | The Water Works & Sewer Board of the City of Gadsden | 898  | \$361 | \$14,448 | 15.8% | 142 | \$361   | \$14,448  | 15.8%  | 142 | \$361 | \$14,448 | 15.8% | 142 |
| 10 | Etowah | Gadsden        | The Water Works & Sewer Board of the City of Gadsden | 470  | \$361 | \$14,448 | 17.3% | 81  | \$361   | \$14,448  | 17.3%  | 81  | \$361 | \$14,448 | 17.3% | 81  |
| 11 | Etowah | Unincorporated | OWTS                                                 | 597  | \$530 | \$21,192 | 10.6% | 64  | \$5,000 | \$200,000 | 100.0% | 597 | \$100 | \$4,000  | 0.3%  | 2   |
| 11 | Etowah | Rainbow City   | Utilities Board of Rainbow City                      | 265  | \$388 | \$15,504 | 1.6%  | 4   | \$388   | \$15,504  | 1.6%   | 4   | \$388 | \$15,504 | 1.6%  | 4   |
| 11 | Etowah | Gadsden        | The Water Works & Sewer Board of the City of Gadsden | 1206 | \$361 | \$14,448 | 0.8%  | 10  | \$361   | \$14,448  | 0.8%   | 10  | \$361 | \$14,448 | 0.8%  | 10  |
| 12 | Etowah | Unincorporated | OWTS                                                 | 158  | \$530 | \$21,192 | 34.4% | 54  | \$5,000 | \$200,000 | 100.0% | 158 | \$100 | \$4,000  | 4.4%  | 7   |
| 12 | Etowah | Gadsden        | The Water Works & Sewer Board of the City of Gadsden | 1206 | \$361 | \$14,448 | 21.8% | 263 | \$361   | \$14,448  | 21.8%  | 263 | \$361 | \$14,448 | 21.8% | 263 |
| 13 | Etowah | Gadsden        | The Water Works & Sewer Board of the City of Gadsden | 1092 | \$361 | \$14,448 | 28.4% | 310 | \$361   | \$14,448  | 28.4%  | 310 | \$361 | \$14,448 | 28.4% | 310 |

|        |        |                |                                                      |      |       |          |       |     |         |           |        |      |       |          |       |     |
|--------|--------|----------------|------------------------------------------------------|------|-------|----------|-------|-----|---------|-----------|--------|------|-------|----------|-------|-----|
| 16     | Etowah | Gadsden        | The Water Works & Sewer Board of the City of Gadsden | 1140 | \$361 | \$14,448 | 13.5% | 154 | \$361   | \$14,448  | 13.5%  | 154  | \$361 | \$14,448 | 13.5% | 154 |
| 16     | Etowah | Glencoe        | Glencoe Water Works Board                            | 58   | \$255 | \$10,214 | 8.5%  | 5   | \$255   | \$10,214  | 8.5%   | 5    | \$255 | \$10,214 | 8.5%  | 5   |
| 17     | Etowah | Gadsden        | The Water Works & Sewer Board of the City of Gadsden | 648  | \$361 | \$14,448 | 20.3% | 132 | \$361   | \$14,448  | 20.3%  | 132  | \$361 | \$14,448 | 20.3% | 132 |
| 17     | Etowah | Glencoe        | Glencoe Water Works Board                            | 36   | \$255 | \$10,214 | 8.3%  | 3   | \$255   | \$10,214  | 8.3%   | 3    | \$255 | \$10,214 | 8.3%  | 3   |
| 101    | Etowah | Reece City     | OWTS                                                 | 51   | \$530 | \$21,194 | 21.3% | 11  | \$5,000 | \$200,000 | 100.0% | 51   | \$100 | \$4,000  | 3.4%  | 2   |
| 101    | Etowah | Attalla        | City of Attalla                                      | 689  | \$218 | \$8,712  | 7.4%  | 51  | \$218   | \$8,712   | 7.4%   | 51   | \$218 | \$8,712  | 7.4%  | 51  |
| 102    | Etowah | Gadsden        | The Water Works & Sewer Board of the City of Gadsden | 93   | \$361 | \$14,448 | 14.3% | 13  | \$361   | \$14,448  | 14.3%  | 13   | \$361 | \$14,448 | 14.3% | 13  |
| 102    | Etowah | Attalla        | City of Attalla                                      | 1823 | \$218 | \$8,712  | 10.1% | 184 | \$218   | \$8,712   | 10.1%  | 184  | \$218 | \$8,712  | 10.1% | 184 |
| 103    | Etowah | Rainbow City   | Utilities Board of Rainbow City                      | 923  | \$388 | \$15,504 | 11.7% | 108 | \$388   | \$15,504  | 11.7%  | 108  | \$388 | \$15,504 | 11.7% | 108 |
| 104.01 | Etowah | Unincorporated | OWTS                                                 | 163  | \$530 | \$21,192 | 19.0% | 31  | \$5,000 | \$200,000 | 100.0% | 163  | \$100 | \$4,000  | 2.6%  | 4   |
| 104.01 | Etowah | Rainbow City   | Utilities Board of Rainbow City                      | 1315 | \$388 | \$15,504 | 11.7% | 154 | \$388   | \$15,504  | 11.7%  | 154  | \$388 | \$15,504 | 11.7% | 154 |
| 104.02 | Etowah | Rainbow City   | Utilities Board of Rainbow City                      | 1027 | \$388 | \$15,504 | 4.4%  | 45  | \$388   | \$15,504  | 4.4%   | 45   | \$388 | \$15,504 | 4.4%  | 45  |
| 104.02 | Etowah | Gadsden        | The Water Works & Sewer Board of the City of Gadsden | 883  | \$361 | \$14,448 | 3.4%  | 30  | \$361   | \$14,448  | 3.4%   | 30   | \$361 | \$14,448 | 3.4%  | 30  |
| 104.02 | Etowah | Attalla        | City of Attalla                                      | 87   | \$218 | \$8,712  | 0.5%  | 0   | \$218   | \$8,712   | 0.5%   | 0    | \$218 | \$8,712  | 0.5%  | 0   |
| 105.01 | Etowah | Unincorporated | OWTS                                                 | 2814 | \$530 | \$21,192 | 12.0% | 337 | \$5,000 | \$200,000 | 100.0% | 2814 | \$100 | \$4,000  | 1.0%  | 27  |
| 105.01 | Etowah | Southside      | Southside Water Works and Sewer Board                | 382  | \$389 | \$15,542 | 6.2%  | 24  | \$389   | \$15,542  | 6.2%   | 24   | \$389 | \$15,542 | 6.2%  | 24  |
| 105.01 | Etowah | Glencoe        | Glencoe Water Works Board                            | 4    | \$255 | \$10,214 | 2.5%  | 0   | \$255   | \$10,214  | 2.5%   | 0    | \$255 | \$10,214 | 2.5%  | 0   |
| 105.02 | Etowah | Unincorporated | OWTS                                                 | 219  | \$530 | \$21,192 | 15.1% | 33  | \$5,000 | \$200,000 | 100.0% | 219  | \$100 | \$4,000  | 1.6%  | 3   |
| 105.02 | Etowah | Hokes Bluff    | Hokes Bluff                                          | 8    | \$440 | \$17,616 | 10.9% | 1   | \$440   | \$17,616  | 10.9%  | 1    | \$440 | \$17,616 | 10.9% | 1   |
| 105.02 | Etowah | Southside      | Southside Water Works and Sewer Board                | 23   | \$389 | \$15,542 | 8.5%  | 2   | \$389   | \$15,542  | 8.5%   | 2    | \$389 | \$15,542 | 8.5%  | 2   |
| 105.02 | Etowah | Glencoe        | Glencoe Water Works Board                            | 1662 | \$255 | \$10,214 | 4.1%  | 68  | \$255   | \$10,214  | 4.1%   | 68   | \$255 | \$10,214 | 4.1%  | 68  |
| 106.01 | Etowah | Unincorporated | OWTS                                                 | 986  | \$530 | \$21,192 | 9.4%  | 93  | \$5,000 | \$200,000 | 99.9%  | 986  | \$100 | \$4,000  | 0.5%  | 5   |
| 106.01 | Etowah | Hokes Bluff    | Hokes Bluff                                          | 736  | \$440 | \$17,616 | 6.3%  | 47  | \$440   | \$17,616  | 6.3%   | 47   | \$440 | \$17,616 | 6.3%  | 47  |
| 106.01 | Etowah | Gadsden        | The Water Works & Sewer Board of the City of Gadsden | 25   | \$361 | \$14,448 | 3.8%  | 1   | \$361   | \$14,448  | 3.8%   | 1    | \$361 | \$14,448 | 3.8%  | 1   |

|        |         |                |                                                                          |      |       |          |       |     |         |           |        |      |       |          |       |     |
|--------|---------|----------------|--------------------------------------------------------------------------|------|-------|----------|-------|-----|---------|-----------|--------|------|-------|----------|-------|-----|
| 106.01 | Etowah  | Glencoe        | Glencoe Water Works Board                                                | 226  | \$255 | \$10,214 | 1.3%  | 3   | \$255   | \$10,214  | 1.3%   | 3    | \$255 | \$10,214 | 1.3%  | 3   |
| 106.02 | Etowah  | Unincorporated | OWTS                                                                     | 938  | \$530 | \$21,192 | 17.2% | 161 | \$5,000 | \$200,000 | 100.0% | 938  | \$100 | \$4,000  | 1.2%  | 11  |
| 106.02 | Etowah  | Hokes Bluff    | Hokes Bluff                                                              | 393  | \$440 | \$17,616 | 12.7% | 50  | \$440   | \$17,616  | 12.7%  | 50   | \$440 | \$17,616 | 12.7% | 50  |
| 107    | Etowah  | Unincorporated | OWTS                                                                     | 1160 | \$530 | \$21,192 | 13.6% | 158 | \$5,000 | \$200,000 | 99.8%  | 1160 | \$100 | \$4,000  | 1.8%  | 20  |
| 107    | Etowah  | Gadsden        | The Water Works & Sewer Board of the City of Gadsden                     | 216  | \$361 | \$14,448 | 7.3%  | 16  | \$361   | \$14,448  | 7.3%   | 16   | \$361 | \$14,448 | 7.3%  | 16  |
| 108    | Etowah  | Unincorporated | OWTS                                                                     | 1018 | \$530 | \$21,192 | 22.3% | 227 | \$5,000 | \$200,000 | 99.9%  | 1018 | \$100 | \$4,000  | 3.5%  | 35  |
| 109    | Etowah  | Unincorporated | OWTS                                                                     | 615  | \$530 | \$21,192 | 22.9% | 141 | \$5,000 | \$200,000 | 99.9%  | 615  | \$100 | \$4,000  | 3.6%  | 22  |
| 109    | Etowah  | Reece City     | OWTS                                                                     | 24   | \$530 | \$21,194 | 22.9% | 6   | \$5,000 | \$200,000 | 99.9%  | 24   | \$100 | \$4,000  | 3.6%  | 1   |
| 109    | Etowah  | Gadsden        | The Water Works & Sewer Board of the City of Gadsden                     | 13   | \$361 | \$14,448 | 15.8% | 2   | \$361   | \$14,448  | 15.8%  | 2    | \$361 | \$14,448 | 15.8% | 2   |
| 110.01 | Etowah  | Unincorporated | OWTS                                                                     | 1125 | \$530 | \$21,192 | 20.2% | 228 | \$5,000 | \$200,000 | 100.0% | 1125 | \$100 | \$4,000  | 1.1%  | 13  |
| 110.01 | Etowah  | Sardis City    | Sardis City Water Works and Sewer Board                                  | 612  | \$783 | \$31,320 | 31.5% | 193 | \$783   | \$31,320  | 31.5%  | 193  | \$783 | \$31,320 | 31.5% | 193 |
| 110.01 | Etowah  | Boaz           | The Board of Water and Sewer Commissioners for the City of Boaz, Alabama | 30   | \$492 | \$19,680 | 17.8% | 5   | \$492   | \$19,680  | 17.8%  | 5    | \$492 | \$19,680 | 17.8% | 5   |
| 110.02 | Etowah  | Unincorporated | OWTS                                                                     | 1027 | \$530 | \$21,192 | 23.4% | 240 | \$5,000 | \$200,000 | 99.9%  | 1027 | \$100 | \$4,000  | 3.6%  | 37  |
| 110.02 | Etowah  | Sardis City    | Sardis City Water Works and Sewer Board                                  | 48   | \$783 | \$31,320 | 37.6% | 18  | \$783   | \$31,320  | 37.6%  | 18   | \$783 | \$31,320 | 37.6% | 18  |
| 110.02 | Etowah  | Boaz           | The Board of Water and Sewer Commissioners for the City of Boaz, Alabama | 737  | \$492 | \$19,680 | 21.2% | 156 | \$492   | \$19,680  | 21.2%  | 156  | \$492 | \$19,680 | 21.2% | 156 |
| 111    | Etowah  | Unincorporated | OWTS                                                                     | 1555 | \$530 | \$21,192 | 23.8% | 370 | \$5,000 | \$200,000 | 100.0% | 1555 | \$100 | \$4,000  | 3.7%  | 58  |
| 111    | Etowah  | Walnut Grove   | OWTS                                                                     | 117  | \$530 | \$21,194 | 23.8% | 28  | \$5,000 | \$200,000 | 100.0% | 117  | \$100 | \$4,000  | 3.7%  | 4   |
| 111    | Etowah  | Altoona        | Altoona Water Works Board                                                | 174  | \$387 | \$15,480 | 15.0% | 26  | \$387   | \$15,480  | 15.0%  | 26   | \$387 | \$15,480 | 15.0% | 26  |
| 112    | Etowah  | Gadsden        | The Water Works & Sewer Board of the City of Gadsden                     | 1048 | \$361 | \$14,448 | 26.1% | 274 | \$361   | \$14,448  | 26.1%  | 274  | \$361 | \$14,448 | 26.1% | 274 |
| 200    | Fayette | Unincorporated | OWTS                                                                     | 596  | \$530 | \$21,192 | 17.5% | 104 | \$5,000 | \$200,000 | 100.0% | 596  | \$100 | \$4,000  | 0.7%  | 4   |
| 200    | Fayette | Glen Allen     | OWTS                                                                     | 2    | \$530 | \$21,194 | 17.5% | 0   | \$5,000 | \$200,000 | 100.0% | 2    | \$100 | \$4,000  | 0.7%  | 0   |
| 201    | Fayette | Unincorporated | OWTS                                                                     | 1056 | \$530 | \$21,192 | 24.9% | 263 | \$5,000 | \$200,000 | 99.8%  | 1056 | \$100 | \$4,000  | 3.3%  | 35  |
| 201    | Fayette | Glen Allen     | OWTS                                                                     | 47   | \$530 | \$21,194 | 24.9% | 12  | \$5,000 | \$200,000 | 99.8%  | 47   | \$100 | \$4,000  | 3.3%  | 2   |
| 201    | Fayette | Gu-Win         | OWTS                                                                     | 1    | \$530 | \$21,194 | 24.9% | 0   | \$5,000 | \$200,000 | 99.8%  | 1    | \$100 | \$4,000  | 3.3%  | 0   |
| 201    | Fayette | Winfield       | Winfield Water Works & Sewer Board                                       | 230  | \$512 | \$20,467 | 24.1% | 55  | \$512   | \$20,467  | 24.1%  | 55   | \$512 | \$20,467 | 24.1% | 55  |
| 202    | Fayette | Unincorporated | OWTS                                                                     | 904  | \$530 | \$21,192 | 20.4% | 185 | \$5,000 | \$200,000 | 100.0% | 904  | \$100 | \$4,000  | 2.6%  | 24  |

|      |          |                |                                                                     |      |       |          |       |     |         |           |        |      |       |          |       |     |
|------|----------|----------------|---------------------------------------------------------------------|------|-------|----------|-------|-----|---------|-----------|--------|------|-------|----------|-------|-----|
| 202  | Fayette  | Belk           | OWTS                                                                | 40   | \$530 | \$21,194 | 20.4% | 8   | \$5,000 | \$200,000 | 100.0% | 40   | \$100 | \$4,000  | 2.6%  | 1   |
| 202  | Fayette  | Fayette        | City of Fayette                                                     | 788  | \$353 | \$14,112 | 12.8% | 100 | \$353   | \$14,112  | 12.8%  | 100  | \$353 | \$14,112 | 12.8% | 100 |
| 203  | Fayette  | Unincorporated | OWTS                                                                | 731  | \$530 | \$21,192 | 38.6% | 283 | \$5,000 | \$200,000 | 100.0% | 731  | \$100 | \$4,000  | 5.5%  | 40  |
| 203  | Fayette  | Fayette        | City of Fayette                                                     | 997  | \$353 | \$14,112 | 26.0% | 259 | \$353   | \$14,112  | 26.0%  | 259  | \$353 | \$14,112 | 26.0% | 259 |
| 204  | Fayette  | Unincorporated | OWTS                                                                | 1214 | \$530 | \$21,192 | 26.4% | 320 | \$5,000 | \$200,000 | 100.0% | 1214 | \$100 | \$4,000  | 4.8%  | 59  |
| 204  | Fayette  | Berry          | Town of Berry                                                       | 196  | \$216 | \$8,640  | 10.5% | 20  | \$216   | \$8,640   | 10.5%  | 20   | \$216 | \$8,640  | 10.5% | 20  |
| 9729 | Franklin | Unincorporated | OWTS                                                                | 542  | \$530 | \$21,192 | 21.9% | 119 | \$5,000 | \$200,000 | 100.0% | 542  | \$100 | \$4,000  | 3.6%  | 19  |
| 9729 | Franklin | Russellville   | Russellville Water Works and Sewer Board                            | 909  | \$439 | \$17,568 | 15.6% | 142 | \$439   | \$17,568  | 15.6%  | 142  | \$439 | \$17,568 | 15.6% | 142 |
| 9730 | Franklin | Unincorporated | OWTS                                                                | 371  | \$530 | \$21,192 | 21.6% | 80  | \$5,000 | \$200,000 | 99.9%  | 371  | \$100 | \$4,000  | 3.5%  | 13  |
| 9730 | Franklin | Russellville   | Russellville Water Works and Sewer Board                            | 1230 | \$439 | \$17,568 | 17.1% | 211 | \$439   | \$17,568  | 17.1%  | 211  | \$439 | \$17,568 | 17.1% | 211 |
| 9731 | Franklin | Unincorporated | OWTS                                                                | 943  | \$530 | \$21,192 | 20.2% | 190 | \$5,000 | \$200,000 | 99.9%  | 943  | \$100 | \$4,000  | 1.5%  | 14  |
| 9732 | Franklin | Unincorporated | OWTS                                                                | 69   | \$530 | \$21,192 | 18.4% | 13  | \$5,000 | \$200,000 | 100.0% | 69   | \$100 | \$4,000  | 1.6%  | 1   |
| 9732 | Franklin | Russellville   | Russellville Water Works and Sewer Board                            | 1154 | \$439 | \$17,568 | 11.4% | 131 | \$439   | \$17,568  | 11.4%  | 131  | \$439 | \$17,568 | 11.4% | 131 |
| 9733 | Franklin | Unincorporated | OWTS                                                                | 519  | \$530 | \$21,192 | 19.0% | 99  | \$5,000 | \$200,000 | 100.0% | 519  | \$100 | \$4,000  | 1.6%  | 8   |
| 9733 | Franklin | Russellville   | Russellville Water Works and Sewer Board                            | 550  | \$439 | \$17,568 | 13.2% | 73  | \$439   | \$17,568  | 13.2%  | 73   | \$439 | \$17,568 | 13.2% | 73  |
| 9734 | Franklin | Unincorporated | OWTS                                                                | 644  | \$530 | \$21,192 | 26.4% | 170 | \$5,000 | \$200,000 | 100.0% | 644  | \$100 | \$4,000  | 3.9%  | 25  |
| 9734 | Franklin | Red Bay        | Sewage Disposal Board of the City of Red Bay                        | 423  | \$507 | \$20,266 | 25.0% | 106 | \$507   | \$20,266  | 25.0%  | 106  | \$507 | \$20,266 | 25.0% | 106 |
| 9735 | Franklin | Unincorporated | OWTS                                                                | 167  | \$530 | \$21,192 | 20.1% | 33  | \$5,000 | \$200,000 | 99.9%  | 167  | \$100 | \$4,000  | 1.1%  | 2   |
| 9735 | Franklin | Vina           | OWTS                                                                | 4    | \$530 | \$21,194 | 20.1% | 1   | \$5,000 | \$200,000 | 99.9%  | 4    | \$100 | \$4,000  | 1.1%  | 0   |
| 9735 | Franklin | Red Bay        | Sewage Disposal Board of the City of Red Bay                        | 793  | \$507 | \$20,266 | 18.8% | 149 | \$507   | \$20,266  | 18.8%  | 149  | \$507 | \$20,266 | 18.8% | 149 |
| 9736 | Franklin | Unincorporated | OWTS                                                                | 549  | \$530 | \$21,192 | 27.3% | 150 | \$5,000 | \$200,000 | 100.0% | 549  | \$100 | \$4,000  | 4.8%  | 26  |
| 9736 | Franklin | Vina           | OWTS                                                                | 26   | \$530 | \$21,194 | 27.3% | 7   | \$5,000 | \$200,000 | 100.0% | 26   | \$100 | \$4,000  | 4.8%  | 1   |
| 9736 | Franklin | Hodges         | OWTS                                                                | 23   | \$530 | \$21,194 | 27.3% | 6   | \$5,000 | \$200,000 | 100.0% | 23   | \$100 | \$4,000  | 4.8%  | 1   |
| 9737 | Franklin | Unincorporated | OWTS                                                                | 1779 | \$530 | \$21,192 | 21.0% | 374 | \$5,000 | \$200,000 | 99.9%  | 1779 | \$100 | \$4,000  | 2.6%  | 46  |
| 9737 | Franklin | Phil Campbell  | The Water Works & Sewer Board of the Town of Phil Campbell, Alabama | 353  | \$368 | \$14,736 | 8.7%  | 31  | \$368   | \$14,736  | 8.7%   | 31   | \$368 | \$14,736 | 8.7%  | 31  |
| 501  | Geneva   | Unincorporated | OWTS                                                                | 1074 | \$530 | \$21,192 | 36.7% | 395 | \$5,000 | \$200,000 | 99.9%  | 1074 | \$100 | \$4,000  | 6.7%  | 72  |
| 501  | Geneva   | Samson         | City of Samson                                                      | 761  | \$291 | \$11,640 | 19.7% | 150 | \$291   | \$11,640  | 19.7%  | 150  | \$291 | \$11,640 | 19.7% | 150 |
| 502  | Geneva   | Unincorporated | OWTS                                                                | 938  | \$530 | \$21,192 | 21.2% | 199 | \$5,000 | \$200,000 | 100.0% | 938  | \$100 | \$4,000  | 2.8%  | 26  |
| 502  | Geneva   | Coffee Springs | OWTS                                                                | 9    | \$530 | \$21,194 | 21.2% | 2   | \$5,000 | \$200,000 | 100.0% | 9    | \$100 | \$4,000  | 2.8%  | 0   |
| 503  | Geneva   | Unincorporated | OWTS                                                                | 1646 | \$530 | \$21,192 | 34.0% | 560 | \$5,000 | \$200,000 | 100.0% | 1646 | \$100 | \$4,000  | 4.4%  | 72  |
| 503  | Geneva   | Geneva         | The Water Works and Sewer Board of the City of Geneva               | 564  | \$247 | \$9,864  | 10.9% | 61  | \$247   | \$9,864   | 10.9%  | 61   | \$247 | \$9,864  | 10.9% | 61  |
| 504  | Geneva   | Unincorporated | OWTS                                                                | 1064 | \$530 | \$21,192 | 28.5% | 304 | \$5,000 | \$200,000 | 100.0% | 1064 | \$100 | \$4,000  | 5.1%  | 54  |



|     |        |                |                                                          |      |         |          |       |     |          |           |        |      |       |          |       |     |
|-----|--------|----------------|----------------------------------------------------------|------|---------|----------|-------|-----|----------|-----------|--------|------|-------|----------|-------|-----|
| 504 | Geneva | Black          | OWTS                                                     | 50   | \$530   | \$21,194 | 28.5% | 14  | \$5,000  | \$200,000 | 100.0% | 50   | \$100 | \$4,000  | 5.1%  | 3   |
| 504 | Geneva | Geneva         | The Water Works and Sewer Board of the City of Geneva    | 6    | \$247   | \$9,864  | 12.5% | 1   | \$247    | \$9,864   | 12.5%  | 1    | \$247 | \$9,864  | 12.5% | 1   |
| 504 | Geneva | Hartford       | City of Hartford                                         | 1016 | \$129   | \$5,160  | 6.6%  | 67  | \$129    | \$5,160   | 6.6%   | 67   | \$129 | \$5,160  | 6.6%  | 67  |
| 505 | Geneva | Unincorporated | OWTS                                                     | 844  | \$530   | \$21,192 | 19.3% | 163 | \$5,000  | \$200,000 | 99.9%  | 844  | \$100 | \$4,000  | 1.8%  | 15  |
| 505 | Geneva | Malvern        | OWTS                                                     | 8    | \$530   | \$21,194 | 19.3% | 2   | \$5,000  | \$200,000 | 99.9%  | 8    | \$100 | \$4,000  | 1.8%  | 0   |
| 505 | Geneva | Slocomb        | Slocomb Water Works and Sewer Board                      | 863  | \$367   | \$14,698 | 12.2% | 105 | \$367    | \$14,698  | 12.2%  | 105  | \$367 | \$14,698 | 12.2% | 105 |
| 506 | Geneva | Unincorporated | OWTS                                                     | 1173 | \$530   | \$21,192 | 20.8% | 244 | \$5,000  | \$200,000 | 100.0% | 1173 | \$100 | \$4,000  | 2.6%  | 31  |
| 506 | Geneva | Malvern        | OWTS                                                     | 334  | \$530   | \$21,194 | 20.8% | 70  | \$5,000  | \$200,000 | 100.0% | 334  | \$100 | \$4,000  | 2.6%  | 9   |
| 506 | Geneva | Taylor         | City of Taylor                                           | 34   | \$467   | \$18,662 | 17.1% | 6   | \$467    | \$18,662  | 17.1%  | 6    | \$467 | \$18,662 | 17.1% | 6   |
| 600 | Greene | Unincorporated | OWTS                                                     | 559  | \$1,819 | \$72,778 | 79.4% | 444 | \$20,000 | \$800,000 | 100.0% | 559  | \$100 | \$4,000  | 7.8%  | 44  |
| 600 | Greene | Union          | OWTS                                                     | 1    | \$1,819 | \$72,776 | 79.4% | 1   | \$20,000 | \$800,000 | 100.0% | 1    | \$100 | \$4,000  | 7.8%  | 0   |
| 601 | Greene | Unincorporated | OWTS                                                     | 300  | \$1,819 | \$72,778 | 89.4% | 268 | \$20,000 | \$800,000 | 100.0% | 300  | \$100 | \$4,000  | 7.2%  | 21  |
| 601 | Greene | Union          | OWTS                                                     | 3    | \$1,819 | \$72,776 | 89.4% | 3   | \$20,000 | \$800,000 | 100.0% | 3    | \$100 | \$4,000  | 7.2%  | 0   |
| 601 | Greene | Eutaw          | City of Eutaw (Eutaw Water Works)                        | 1245 | \$191   | \$7,656  | 13.7% | 171 | \$191    | \$7,656   | 13.7%  | 171  | \$191 | \$7,656  | 13.7% | 171 |
| 602 | Greene | Unincorporated | OWTS                                                     | 711  | \$1,819 | \$72,778 | 80.8% | 575 | \$20,000 | \$800,000 | 100.0% | 711  | \$100 | \$4,000  | 9.9%  | 70  |
| 602 | Greene | Forkland       | OWTS                                                     | 13   | \$1,819 | \$72,776 | 80.8% | 10  | \$20,000 | \$800,000 | 100.0% | 13   | \$100 | \$4,000  | 9.9%  | 1   |
| 602 | Greene | Demopolis      | The Water Works and Sewer Board of the City of Demopolis | 1    | \$336   | \$13,421 | 35.2% | 0   | \$336    | \$13,421  | 35.2%  | 0    | \$336 | \$13,421 | 35.2% | 0   |
| 602 | Greene | Boligee        | City of Eutaw (Eutaw Water Works)                        | 118  | \$191   | \$7,656  | 18.9% | 22  | \$191    | \$7,656   | 18.9%  | 22   | \$191 | \$7,656  | 18.9% | 22  |
| 400 | Hale   | Unincorporated | OWTS                                                     | 594  | \$1,819 | \$72,778 | 64.7% | 384 | \$20,000 | \$800,000 | 99.9%  | 594  | \$100 | \$4,000  | 3.2%  | 19  |
| 400 | Hale   | Moundville     | City of Moundville                                       | 708  | \$417   | \$16,661 | 14.8% | 105 | \$417    | \$16,661  | 14.8%  | 105  | \$417 | \$16,661 | 14.8% | 105 |
| 401 | Hale   | Unincorporated | OWTS                                                     | 385  | \$1,819 | \$72,778 | 77.2% | 298 | \$20,000 | \$800,000 | 99.9%  | 385  | \$100 | \$4,000  | 4.4%  | 17  |
| 401 | Hale   | Akron          | Town of Akron                                            | 140  | \$441   | \$17,645 | 27.0% | 38  | \$441    | \$17,645  | 27.0%  | 38   | \$441 | \$17,645 | 27.0% | 38  |
| 402 | Hale   | Unincorporated | OWTS                                                     | 523  | \$1,819 | \$72,778 | 71.5% | 374 | \$20,000 | \$800,000 | 100.0% | 523  | \$100 | \$4,000  | 3.8%  | 20  |
| 403 | Hale   | Unincorporated | OWTS                                                     | 742  | \$1,819 | \$72,778 | 79.4% | 589 | \$20,000 | \$800,000 | 99.9%  | 742  | \$100 | \$4,000  | 6.7%  | 50  |
| 404 | Hale   | Unincorporated | OWTS                                                     | 721  | \$1,819 | \$72,778 | 83.3% | 600 | \$20,000 | \$800,000 | 100.0% | 721  | \$100 | \$4,000  | 8.8%  | 64  |
| 404 | Hale   | Greensboro     | Utilities Board of the City of Greensboro                | 1294 | \$114   | \$4,560  | 10.1% | 130 | \$114    | \$4,560   | 10.1%  | 130  | \$114 | \$4,560  | 10.1% | 130 |
| 405 | Hale   | Unincorporated | OWTS                                                     | 538  | \$1,819 | \$72,778 | 89.6% | 482 | \$20,000 | \$800,000 | 100.0% | 538  | \$100 | \$4,000  | 8.1%  | 44  |
| 405 | Hale   | Newbern        | OWTS                                                     | 5    | \$1,819 | \$72,776 | 89.6% | 5   | \$20,000 | \$800,000 | 100.0% | 5    | \$100 | \$4,000  | 8.1%  | 0   |
| 301 | Henry  | Unincorporated | OWTS                                                     | 621  | \$530   | \$21,192 | 22.2% | 138 | \$5,000  | \$200,000 | 100.0% | 621  | \$100 | \$4,000  | 3.3%  | 20  |
| 302 | Henry  | Unincorporated | OWTS                                                     | 253  | \$530   | \$21,192 | 33.0% | 84  | \$5,000  | \$200,000 | 99.9%  | 253  | \$100 | \$4,000  | 4.6%  | 12  |
| 302 | Henry  | Abbeville      | Water and Sewer Board of the City of Abbeville           | 873  | \$138   | \$5,534  | 6.4%  | 56  | \$138    | \$5,534   | 6.4%   | 56   | \$138 | \$5,534  | 6.4%  | 56  |
| 303 | Henry  | Unincorporated | OWTS                                                     | 1244 | \$530   | \$21,192 | 28.1% | 349 | \$5,000  | \$200,000 | 99.9%  | 1244 | \$100 | \$4,000  | 5.2%  | 65  |
| 304 | Henry  | Unincorporated | OWTS                                                     | 364  | \$530   | \$21,192 | 20.9% | 76  | \$5,000  | \$200,000 | 100.0% | 364  | \$100 | \$4,000  | 2.6%  | 10  |

|        |         |                |                  |      |       |          |       |     |         |           |        |      |       |          |       |     |
|--------|---------|----------------|------------------|------|-------|----------|-------|-----|---------|-----------|--------|------|-------|----------|-------|-----|
| 304    | Henry   | Newville       | Newville         | 215  | \$267 | \$10,680 | 7.2%  | 15  | \$267   | \$10,680  | 7.2%   | 15   | \$267 | \$10,680 | 7.2%  | 15  |
| 304    | Henry   | Headland       | City of Headland | 168  | \$206 | \$8,256  | 5.4%  | 9   | \$206   | \$8,256   | 5.4%   | 9    | \$206 | \$8,256  | 5.4%  | 9   |
| 305    | Henry   | Unincorporated | OWTS             | 453  | \$530 | \$21,192 | 12.8% | 58  | \$5,000 | \$200,000 | 100.0% | 453  | \$100 | \$4,000  | 1.8%  | 8   |
| 305    | Henry   | Dothan         | City of Dothan   | 28   | \$467 | \$18,662 | 11.1% | 3   | \$467   | \$18,662  | 11.1%  | 3    | \$467 | \$18,662 | 11.1% | 3   |
| 305    | Henry   | Headland       | City of Headland | 1783 | \$206 | \$8,256  | 3.7%  | 66  | \$206   | \$8,256   | 3.7%   | 66   | \$206 | \$8,256  | 3.7%  | 66  |
| 306    | Henry   | Unincorporated | OWTS             | 608  | \$530 | \$21,192 | 21.9% | 133 | \$5,000 | \$200,000 | 100.0% | 608  | \$100 | \$4,000  | 4.6%  | 28  |
| 306    | Henry   | Haleburg       | OWTS             | 20   | \$530 | \$21,194 | 21.9% | 4   | \$5,000 | \$200,000 | 100.0% | 20   | \$100 | \$4,000  | 4.6%  | 1   |
| 401    | Houston | Unincorporated | OWTS             | 1720 | \$530 | \$21,192 | 11.7% | 201 | \$5,000 | \$200,000 | 100.0% | 1720 | \$100 | \$4,000  | 1.0%  | 18  |
| 401    | Houston | Dothan         | City of Dothan   | 258  | \$467 | \$18,662 | 9.0%  | 23  | \$467   | \$18,662  | 9.0%   | 23   | \$467 | \$18,662 | 9.0%  | 23  |
| 402.01 | Houston | Dothan         | City of Dothan   | 3932 | \$467 | \$18,662 | 8.2%  | 321 | \$467   | \$18,662  | 8.2%   | 321  | \$467 | \$18,662 | 8.2%  | 321 |
| 402.02 | Houston | Unincorporated | OWTS             | 815  | \$530 | \$21,192 | 9.8%  | 80  | \$5,000 | \$200,000 | 100.0% | 815  | \$100 | \$4,000  | 1.4%  | 11  |
| 402.02 | Houston | Dothan         | City of Dothan   | 2490 | \$467 | \$18,662 | 8.1%  | 202 | \$467   | \$18,662  | 8.1%   | 202  | \$467 | \$18,662 | 8.1%  | 202 |
| 403.01 | Houston | Dothan         | City of Dothan   | 1564 | \$467 | \$18,662 | 21.3% | 332 | \$467   | \$18,662  | 21.3%  | 332  | \$467 | \$18,662 | 21.3% | 332 |
| 403.02 | Houston | Unincorporated | OWTS             | 377  | \$530 | \$21,192 | 23.5% | 89  | \$5,000 | \$200,000 | 100.0% | 377  | \$100 | \$4,000  | 3.0%  | 11  |
| 403.02 | Houston | Dothan         | City of Dothan   | 1067 | \$467 | \$18,662 | 19.6% | 210 | \$467   | \$18,662  | 19.6%  | 210  | \$467 | \$18,662 | 19.6% | 210 |
| 404    | Houston | Dothan         | City of Dothan   | 986  | \$467 | \$18,662 | 12.6% | 124 | \$467   | \$18,662  | 12.6%  | 124  | \$467 | \$18,662 | 12.6% | 124 |
| 405    | Houston | Dothan         | City of Dothan   | 1496 | \$467 | \$18,662 | 14.0% | 209 | \$467   | \$18,662  | 14.0%  | 209  | \$467 | \$18,662 | 14.0% | 209 |
| 406    | Houston | Dothan         | City of Dothan   | 768  | \$467 | \$18,662 | 57.8% | 444 | \$467   | \$18,662  | 57.8%  | 444  | \$467 | \$18,662 | 57.8% | 444 |
| 407    | Houston | Dothan         | City of Dothan   | 977  | \$467 | \$18,662 | 20.0% | 195 | \$467   | \$18,662  | 20.0%  | 195  | \$467 | \$18,662 | 20.0% | 195 |
| 408    | Houston | Unincorporated | OWTS             | 372  | \$530 | \$21,192 | 20.7% | 77  | \$5,000 | \$200,000 | 99.9%  | 372  | \$100 | \$4,000  | 3.4%  | 13  |
| 408    | Houston | Rehobeth       | OWTS             | 547  | \$530 | \$21,194 | 20.7% | 113 | \$5,000 | \$200,000 | 99.9%  | 547  | \$100 | \$4,000  | 3.4%  | 19  |
| 408    | Houston | Dothan         | City of Dothan   | 2265 | \$467 | \$18,662 | 18.0% | 409 | \$467   | \$18,662  | 18.0%  | 409  | \$467 | \$18,662 | 18.0% | 409 |
| 408    | Houston | Taylor         | City of Taylor   | 85   | \$467 | \$18,662 | 18.0% | 15  | \$467   | \$18,662  | 18.0%  | 15   | \$467 | \$18,662 | 18.0% | 15  |
| 409    | Houston | Unincorporated | OWTS             | 197  | \$530 | \$21,192 | 15.8% | 31  | \$5,000 | \$200,000 | 99.9%  | 197  | \$100 | \$4,000  | 1.8%  | 3   |
| 409    | Houston | Cowarts        | Cowarts          | 25   | \$576 | \$23,040 | 17.6% | 4   | \$576   | \$23,040  | 17.6%  | 4    | \$576 | \$23,040 | 17.6% | 4   |
| 409    | Houston | Dothan         | City of Dothan   | 1690 | \$467 | \$18,662 | 13.4% | 226 | \$467   | \$18,662  | 13.4%  | 226  | \$467 | \$18,662 | 13.4% | 226 |
| 410    | Houston | Dothan         | City of Dothan   | 1873 | \$467 | \$18,662 | 30.3% | 567 | \$467   | \$18,662  | 30.3%  | 567  | \$467 | \$18,662 | 30.3% | 567 |
| 411    | Houston | Dothan         | City of Dothan   | 1461 | \$467 | \$18,662 | 23.7% | 346 | \$467   | \$18,662  | 23.7%  | 346  | \$467 | \$18,662 | 23.7% | 346 |
| 412    | Houston | Dothan         | City of Dothan   | 825  | \$467 | \$18,662 | 52.3% | 431 | \$467   | \$18,662  | 52.3%  | 431  | \$467 | \$18,662 | 52.3% | 431 |
| 414    | Houston | Dothan         | City of Dothan   | 1162 | \$467 | \$18,662 | 38.0% | 442 | \$467   | \$18,662  | 38.0%  | 442  | \$467 | \$18,662 | 38.0% | 442 |
| 415    | Houston | Kinsey         | Kinsey           | 143  | \$654 | \$26,160 | 44.2% | 63  | \$654   | \$26,160  | 44.2%  | 63   | \$654 | \$26,160 | 44.2% | 63  |
| 415    | Houston | Dothan         | City of Dothan   | 1397 | \$467 | \$18,662 | 33.4% | 466 | \$467   | \$18,662  | 33.4%  | 466  | \$467 | \$18,662 | 33.4% | 466 |
| 416    | Houston | Unincorporated | OWTS             | 185  | \$530 | \$21,192 | 21.6% | 40  | \$5,000 | \$200,000 | 100.0% | 185  | \$100 | \$4,000  | 4.2%  | 8   |
| 416    | Houston | Webb           | OWTS             | 394  | \$530 | \$21,194 | 21.6% | 85  | \$5,000 | \$200,000 | 100.0% | 394  | \$100 | \$4,000  | 4.2%  | 17  |
| 416    | Houston | Kinsey         | Kinsey           | 497  | \$654 | \$26,160 | 27.4% | 136 | \$654   | \$26,160  | 27.4%  | 136  | \$654 | \$26,160 | 27.4% | 136 |
| 416    | Houston | Cowarts        | Cowarts          | 49   | \$576 | \$23,040 | 23.6% | 12  | \$576   | \$23,040  | 23.6%  | 12   | \$576 | \$23,040 | 23.6% | 12  |
| 416    | Houston | Dothan         | City of Dothan   | 834  | \$467 | \$18,662 | 18.8% | 157 | \$467   | \$18,662  | 18.8%  | 157  | \$467 | \$18,662 | 18.8% | 157 |
| 417    | Houston | Unincorporated | OWTS             | 191  | \$530 | \$21,192 | 30.0% | 57  | \$5,000 | \$200,000 | 99.9%  | 191  | \$100 | \$4,000  | 4.3%  | 8   |
| 417    | Houston | Columbia       | Town of Columbia | 373  | \$131 | \$5,251  | 5.7%  | 21  | \$131   | \$5,251   | 5.7%   | 21   | \$131 | \$5,251  | 5.7%  | 21  |
| 418    | Houston | Unincorporated | OWTS             | 626  | \$530 | \$21,192 | 24.0% | 150 | \$5,000 | \$200,000 | 100.0% | 626  | \$100 | \$4,000  | 4.4%  | 28  |
| 418    | Houston | Gordon         | Town of Gordon   | 130  | \$439 | \$17,578 | 19.4% | 25  | \$439   | \$17,578  | 19.4%  | 25   | \$439 | \$17,578 | 19.4% | 25  |
| 419    | Houston | Unincorporated | OWTS             | 1025 | \$530 | \$21,192 | 20.2% | 207 | \$5,000 | \$200,000 | 100.0% | 1025 | \$100 | \$4,000  | 2.7%  | 27  |

|      |         |                 |                                             |      |       |          |       |     |         |           |        |      |       |          |       |     |
|------|---------|-----------------|---------------------------------------------|------|-------|----------|-------|-----|---------|-----------|--------|------|-------|----------|-------|-----|
| 419  | Houston | Webb            | OWTS                                        | 3    | \$530 | \$21,194 | 20.2% | 1   | \$5,000 | \$200,000 | 100.0% | 3    | \$100 | \$4,000  | 2.7%  | 0   |
| 419  | Houston | Cowarts         | Cowarts                                     | 692  | \$576 | \$23,040 | 22.8% | 158 | \$576   | \$23,040  | 22.8%  | 158  | \$576 | \$23,040 | 22.8% | 158 |
| 419  | Houston | Dothan          | City of Dothan                              | 300  | \$467 | \$18,662 | 16.7% | 50  | \$467   | \$18,662  | 16.7%  | 50   | \$467 | \$18,662 | 16.7% | 50  |
| 419  | Houston | Ashford         | City of Ashford                             | 843  | \$408 | \$16,320 | 13.4% | 113 | \$408   | \$16,320  | 13.4%  | 113  | \$408 | \$16,320 | 13.4% | 113 |
| 420  | Houston | Unincorporated  | OWTS                                        | 1437 | \$530 | \$21,192 | 20.5% | 294 | \$5,000 | \$200,000 | 99.9%  | 1437 | \$100 | \$4,000  | 2.8%  | 40  |
| 420  | Houston | Dothan          | City of Dothan                              | 134  | \$467 | \$18,662 | 17.8% | 24  | \$467   | \$18,662  | 17.8%  | 24   | \$467 | \$18,662 | 17.8% | 24  |
| 420  | Houston | Cottonwood      | Town of Cottonwood                          | 507  | \$204 | \$8,160  | 5.7%  | 29  | \$204   | \$8,160   | 5.7%   | 29   | \$204 | \$8,160  | 5.7%  | 29  |
| 421  | Houston | Unincorporated  | OWTS                                        | 1969 | \$530 | \$21,192 | 17.4% | 342 | \$5,000 | \$200,000 | 99.9%  | 1969 | \$100 | \$4,000  | 1.6%  | 32  |
| 421  | Houston | Rehobeth        | OWTS                                        | 147  | \$530 | \$21,194 | 17.4% | 26  | \$5,000 | \$200,000 | 99.9%  | 147  | \$100 | \$4,000  | 1.6%  | 2   |
| 421  | Houston | Madrid          | OWTS                                        | 68   | \$530 | \$21,194 | 17.4% | 12  | \$5,000 | \$200,000 | 99.9%  | 68   | \$100 | \$4,000  | 1.6%  | 1   |
| 421  | Houston | Taylor          | City of Taylor                              | 395  | \$467 | \$18,662 | 14.4% | 57  | \$467   | \$18,662  | 14.4%  | 57   | \$467 | \$18,662 | 14.4% | 57  |
| 421  | Houston | Dothan          | City of Dothan                              | 20   | \$467 | \$18,662 | 14.4% | 3   | \$467   | \$18,662  | 14.4%  | 3    | \$467 | \$18,662 | 14.4% | 3   |
| 9501 | Jackson | Unincorporated  | OWTS                                        | 2640 | \$530 | \$21,192 | 30.9% | 815 | \$5,000 | \$200,000 | 100.0% | 2640 | \$100 | \$4,000  | 4.4%  | 117 |
| 9502 | Jackson | Bridgeport      | Utilities Board of the City of Bridgeport   | 1419 | \$337 | \$13,469 | 21.4% | 303 | \$337   | \$13,469  | 21.4%  | 303  | \$337 | \$13,469 | 21.4% | 303 |
| 9503 | Jackson | Unincorporated  | OWTS                                        | 1364 | \$530 | \$21,192 | 25.1% | 342 | \$5,000 | \$200,000 | 100.0% | 1364 | \$100 | \$4,000  | 5.2%  | 70  |
| 9503 | Jackson | Hyttop          | OWTS                                        | 11   | \$530 | \$21,194 | 25.1% | 3   | \$5,000 | \$200,000 | 100.0% | 11   | \$100 | \$4,000  | 5.2%  | 1   |
| 9503 | Jackson | Stevenson       | Stevenson Utilities Board                   | 784  | \$433 | \$17,304 | 20.9% | 164 | \$433   | \$17,304  | 20.9%  | 164  | \$433 | \$17,304 | 20.9% | 164 |
| 9503 | Jackson | Bridgeport      | Utilities Board of the City of Bridgeport   | 150  | \$337 | \$13,469 | 16.7% | 25  | \$337   | \$13,469  | 16.7%  | 25   | \$337 | \$13,469 | 16.7% | 25  |
| 9504 | Jackson | Unincorporated  | OWTS                                        | 796  | \$530 | \$21,192 | 26.3% | 209 | \$5,000 | \$200,000 | 100.0% | 796  | \$100 | \$4,000  | 4.3%  | 34  |
| 9504 | Jackson | Skyline         | OWTS                                        | 6    | \$530 | \$21,194 | 26.3% | 2   | \$5,000 | \$200,000 | 100.0% | 6    | \$100 | \$4,000  | 4.3%  | 0   |
| 9504 | Jackson | Hyttop          | OWTS                                        | 3    | \$530 | \$21,194 | 26.3% | 1   | \$5,000 | \$200,000 | 100.0% | 3    | \$100 | \$4,000  | 4.3%  | 0   |
| 9505 | Jackson | Unincorporated  | OWTS                                        | 934  | \$530 | \$21,192 | 26.5% | 248 | \$5,000 | \$200,000 | 99.9%  | 934  | \$100 | \$4,000  | 3.2%  | 30  |
| 9505 | Jackson | Pleasant Groves | OWTS                                        | 47   | \$530 | \$21,194 | 26.5% | 12  | \$5,000 | \$200,000 | 99.9%  | 47   | \$100 | \$4,000  | 3.2%  | 1   |
| 9505 | Jackson | Paint Rock      | OWTS                                        | 6    | \$530 | \$21,194 | 26.5% | 2   | \$5,000 | \$200,000 | 99.9%  | 6    | \$100 | \$4,000  | 3.2%  | 0   |
| 9505 | Jackson | Skyline         | OWTS                                        | 1    | \$530 | \$21,194 | 26.5% | 0   | \$5,000 | \$200,000 | 99.9%  | 1    | \$100 | \$4,000  | 3.2%  | 0   |
| 9505 | Jackson | Woodville       | Town of Woodville                           | 294  | \$540 | \$21,600 | 27.1% | 80  | \$540   | \$21,600  | 27.1%  | 80   | \$540 | \$21,600 | 27.1% | 80  |
| 9506 | Jackson | Unincorporated  | OWTS                                        | 1583 | \$530 | \$21,192 | 17.2% | 272 | \$5,000 | \$200,000 | 100.0% | 1583 | \$100 | \$4,000  | 3.6%  | 56  |
| 9506 | Jackson | Skyline         | OWTS                                        | 55   | \$530 | \$21,194 | 17.2% | 10  | \$5,000 | \$200,000 | 100.0% | 55   | \$100 | \$4,000  | 3.6%  | 2   |
| 9506 | Jackson | Hyttop          | OWTS                                        | 9    | \$530 | \$21,194 | 17.2% | 1   | \$5,000 | \$200,000 | 100.0% | 9    | \$100 | \$4,000  | 3.6%  | 0   |
| 9506 | Jackson | Hollywood       | Jackson County Water Authority              | 244  | \$480 | \$19,200 | 15.7% | 38  | \$480   | \$19,200  | 15.7%  | 38   | \$480 | \$19,200 | 15.7% | 38  |
| 9506 | Jackson | Scottsboro      | Scottsboro Water Works, Sewer and Gas Board | 638  | \$458 | \$18,322 | 15.1% | 96  | \$458   | \$18,322  | 15.1%  | 96   | \$458 | \$18,322 | 15.1% | 96  |
| 9507 | Jackson | Unincorporated  | OWTS                                        | 72   | \$530 | \$21,192 | 26.1% | 19  | \$5,000 | \$200,000 | 99.9%  | 72   | \$100 | \$4,000  | 4.0%  | 3   |
| 9507 | Jackson | Scottsboro      | Scottsboro Water Works, Sewer and Gas Board | 1722 | \$458 | \$18,322 | 22.3% | 384 | \$458   | \$18,322  | 22.3%  | 384  | \$458 | \$18,322 | 22.3% | 384 |

|       |           |                |                                             |      |         |          |       |      |         |           |        |      |         |          |       |      |
|-------|-----------|----------------|---------------------------------------------|------|---------|----------|-------|------|---------|-----------|--------|------|---------|----------|-------|------|
| 9508  | Jackson   | Scottsboro     | Scottsboro Water Works, Sewer and Gas Board | 1618 | \$458   | \$18,322 | 30.3% | 490  | \$458   | \$18,322  | 30.3%  | 490  | \$458   | \$18,322 | 30.3% | 490  |
| 9509  | Jackson   | Unincorporated | OWTS                                        | 181  | \$530   | \$21,192 | 14.4% | 26   | \$5,000 | \$200,000 | 100.0% | 181  | \$100   | \$4,000  | 1.2%  | 2    |
| 9509  | Jackson   | Hollywood      | Jackson County Water Authority              | 148  | \$480   | \$19,200 | 12.6% | 19   | \$480   | \$19,200  | 12.6%  | 19   | \$480   | \$19,200 | 12.6% | 19   |
| 9509  | Jackson   | Scottsboro     | Scottsboro Water Works, Sewer and Gas Board | 1904 | \$458   | \$18,322 | 11.8% | 224  | \$458   | \$18,322  | 11.8%  | 224  | \$458   | \$18,322 | 11.8% | 224  |
| 9510  | Jackson   | Unincorporated | OWTS                                        | 1506 | \$530   | \$21,192 | 27.8% | 418  | \$5,000 | \$200,000 | 100.0% | 1506 | \$100   | \$4,000  | 2.2%  | 33   |
| 9510  | Jackson   | Pisgah         | OWTS                                        | 97   | \$530   | \$21,194 | 27.8% | 27   | \$5,000 | \$200,000 | 100.0% | 97   | \$100   | \$4,000  | 2.2%  | 2    |
| 9511  | Jackson   | Unincorporated | OWTS                                        | 1866 | \$530   | \$21,192 | 23.0% | 429  | \$5,000 | \$200,000 | 100.0% | 1866 | \$100   | \$4,000  | 2.4%  | 46   |
| 9511  | Jackson   | Langston       | OWTS                                        | 167  | \$530   | \$21,194 | 23.0% | 38   | \$5,000 | \$200,000 | 100.0% | 167  | \$100   | \$4,000  | 2.4%  | 4    |
| 9511  | Jackson   | Section        | Waterworks Board of Section & Dutton        | 299  | \$589   | \$23,549 | 25.5% | 76   | \$589   | \$23,549  | 25.5%  | 76   | \$589   | \$23,549 | 25.5% | 76   |
| 9511  | Jackson   | Dutton         | Waterworks Board of Section & Dutton        | 131  | \$589   | \$23,549 | 25.5% | 33   | \$589   | \$23,549  | 25.5%  | 33   | \$589   | \$23,549 | 25.5% | 33   |
| 1     | Jefferson | Birmingham     | Jefferson County Sewer                      | 1095 | \$1,047 | \$41,890 | 69.3% | 759  | \$1,047 | \$41,890  | 69.3%  | 759  | \$1,047 | \$41,890 | 69.3% | 759  |
| 3     | Jefferson | Birmingham     | Jefferson County Sewer                      | 757  | \$1,047 | \$41,890 | 69.0% | 523  | \$1,047 | \$41,890  | 69.0%  | 523  | \$1,047 | \$41,890 | 69.0% | 523  |
| 4     | Jefferson | Birmingham     | Jefferson County Sewer                      | 1218 | \$1,047 | \$41,890 | 64.1% | 781  | \$1,047 | \$41,890  | 64.1%  | 781  | \$1,047 | \$41,890 | 64.1% | 781  |
| 5     | Jefferson | Birmingham     | Jefferson County Sewer                      | 1263 | \$1,047 | \$41,890 | 75.0% | 947  | \$1,047 | \$41,890  | 75.0%  | 947  | \$1,047 | \$41,890 | 75.0% | 947  |
| 7     | Jefferson | Birmingham     | Jefferson County Sewer                      | 1037 | \$1,047 | \$41,890 | 78.7% | 816  | \$1,047 | \$41,890  | 78.7%  | 816  | \$1,047 | \$41,890 | 78.7% | 816  |
| 8     | Jefferson | Birmingham     | Jefferson County Sewer                      | 1535 | \$1,047 | \$41,890 | 74.9% | 1149 | \$1,047 | \$41,890  | 74.9%  | 1149 | \$1,047 | \$41,890 | 74.9% | 1149 |
| 11    | Jefferson | Birmingham     | Jefferson County Sewer                      | 1851 | \$1,047 | \$41,890 | 51.9% | 960  | \$1,047 | \$41,890  | 51.9%  | 960  | \$1,047 | \$41,890 | 51.9% | 960  |
| 12    | Jefferson | Birmingham     | Jefferson County Sewer                      | 1279 | \$1,047 | \$41,890 | 65.4% | 836  | \$1,047 | \$41,890  | 65.4%  | 836  | \$1,047 | \$41,890 | 65.4% | 836  |
| 14    | Jefferson | Birmingham     | Jefferson County Sewer                      | 816  | \$1,047 | \$41,890 | 55.1% | 449  | \$1,047 | \$41,890  | 55.1%  | 449  | \$1,047 | \$41,890 | 55.1% | 449  |
| 15    | Jefferson | Birmingham     | Jefferson County Sewer                      | 1180 | \$1,047 | \$41,890 | 74.6% | 880  | \$1,047 | \$41,890  | 74.6%  | 880  | \$1,047 | \$41,890 | 74.6% | 880  |
| 16    | Jefferson | Birmingham     | Jefferson County Sewer                      | 965  | \$1,047 | \$41,890 | 55.9% | 540  | \$1,047 | \$41,890  | 55.9%  | 540  | \$1,047 | \$41,890 | 55.9% | 540  |
| 19.02 | Jefferson | Birmingham     | Jefferson County Sewer                      | 806  | \$1,047 | \$41,890 | 80.1% | 646  | \$1,047 | \$41,890  | 80.1%  | 646  | \$1,047 | \$41,890 | 80.1% | 646  |
| 20    | Jefferson | Birmingham     | Jefferson County Sewer                      | 1252 | \$1,047 | \$41,890 | 62.4% | 781  | \$1,047 | \$41,890  | 62.4%  | 781  | \$1,047 | \$41,890 | 62.4% | 781  |
| 20    | Jefferson | Irondale       | Jefferson County Sewer                      | 166  | \$1,047 | \$41,890 | 62.4% | 104  | \$1,047 | \$41,890  | 62.4%  | 104  | \$1,047 | \$41,890 | 62.4% | 104  |
| 21    | Jefferson | Birmingham     | Jefferson County Sewer                      | 1286 | \$1,047 | \$41,890 | 66.7% | 858  | \$1,047 | \$41,890  | 66.7%  | 858  | \$1,047 | \$41,890 | 66.7% | 858  |
| 22    | Jefferson | Birmingham     | Jefferson County Sewer                      | 940  | \$1,047 | \$41,890 | 64.7% | 608  | \$1,047 | \$41,890  | 64.7%  | 608  | \$1,047 | \$41,890 | 64.7% | 608  |
| 23.03 | Jefferson | Birmingham     | Jefferson County Sewer                      | 1366 | \$1,047 | \$41,890 | 68.2% | 931  | \$1,047 | \$41,890  | 68.2%  | 931  | \$1,047 | \$41,890 | 68.2% | 931  |
| 23.05 | Jefferson | Birmingham     | Jefferson County Sewer                      | 1506 | \$1,047 | \$41,890 | 25.0% | 376  | \$1,047 | \$41,890  | 25.0%  | 376  | \$1,047 | \$41,890 | 25.0% | 376  |
| 23.06 | Jefferson | Birmingham     | Jefferson County Sewer                      | 1863 | \$1,047 | \$41,890 | 26.8% | 498  | \$1,047 | \$41,890  | 26.8%  | 498  | \$1,047 | \$41,890 | 26.8% | 498  |
| 23.06 | Jefferson | Mountain Brook | Jefferson County Sewer                      | 13   | \$1,047 | \$41,890 | 26.8% | 4    | \$1,047 | \$41,890  | 26.8%  | 4    | \$1,047 | \$41,890 | 26.8% | 4    |
| 24    | Jefferson | Birmingham     | Jefferson County Sewer                      | 1745 | \$1,047 | \$41,890 | 59.9% | 1045 | \$1,047 | \$41,890  | 59.9%  | 1045 | \$1,047 | \$41,890 | 59.9% | 1045 |
| 27    | Jefferson | Birmingham     | Jefferson County Sewer                      | 1958 | \$1,047 | \$41,890 | 61.0% | 1195 | \$1,047 | \$41,890  | 61.0%  | 1195 | \$1,047 | \$41,890 | 61.0% | 1195 |
| 29    | Jefferson | Birmingham     | Jefferson County Sewer                      | 1053 | \$1,047 | \$41,890 | 79.4% | 837  | \$1,047 | \$41,890  | 79.4%  | 837  | \$1,047 | \$41,890 | 79.4% | 837  |
| 30.01 | Jefferson | Birmingham     | Jefferson County Sewer                      | 905  | \$1,047 | \$41,890 | 63.9% | 578  | \$1,047 | \$41,890  | 63.9%  | 578  | \$1,047 | \$41,890 | 63.9% | 578  |

|       |           |                |                        |      |         |          |       |      |         |          |       |      |         |          |       |      |
|-------|-----------|----------------|------------------------|------|---------|----------|-------|------|---------|----------|-------|------|---------|----------|-------|------|
| 30.02 | Jefferson | Birmingham     | Jefferson County Sewer | 1083 | \$1,047 | \$41,890 | 74.4% | 806  | \$1,047 | \$41,890 | 74.4% | 806  | \$1,047 | \$41,890 | 74.4% | 806  |
| 31    | Jefferson | Birmingham     | Jefferson County Sewer | 1426 | \$1,047 | \$41,890 | 65.2% | 930  | \$1,047 | \$41,890 | 65.2% | 930  | \$1,047 | \$41,890 | 65.2% | 930  |
| 32    | Jefferson | Birmingham     | Jefferson County Sewer | 513  | \$1,047 | \$41,890 | 69.4% | 356  | \$1,047 | \$41,890 | 69.4% | 356  | \$1,047 | \$41,890 | 69.4% | 356  |
| 33    | Jefferson | Birmingham     | Jefferson County Sewer | 426  | \$1,047 | \$41,890 | 67.3% | 287  | \$1,047 | \$41,890 | 67.3% | 287  | \$1,047 | \$41,890 | 67.3% | 287  |
| 34    | Jefferson | Birmingham     | Jefferson County Sewer | 823  | \$1,047 | \$41,890 | 64.5% | 531  | \$1,047 | \$41,890 | 64.5% | 531  | \$1,047 | \$41,890 | 64.5% | 531  |
| 35    | Jefferson | Birmingham     | Jefferson County Sewer | 993  | \$1,047 | \$41,890 | 59.2% | 588  | \$1,047 | \$41,890 | 59.2% | 588  | \$1,047 | \$41,890 | 59.2% | 588  |
| 36    | Jefferson | Birmingham     | Jefferson County Sewer | 1845 | \$1,047 | \$41,890 | 52.3% | 965  | \$1,047 | \$41,890 | 52.3% | 965  | \$1,047 | \$41,890 | 52.3% | 965  |
| 37    | Jefferson | Birmingham     | Jefferson County Sewer | 1812 | \$1,047 | \$41,890 | 69.6% | 1261 | \$1,047 | \$41,890 | 69.6% | 1261 | \$1,047 | \$41,890 | 69.6% | 1261 |
| 38.02 | Jefferson | Birmingham     | Jefferson County Sewer | 1894 | \$1,047 | \$41,890 | 52.8% | 999  | \$1,047 | \$41,890 | 52.8% | 999  | \$1,047 | \$41,890 | 52.8% | 999  |
| 38.03 | Jefferson | Birmingham     | Jefferson County Sewer | 1593 | \$1,047 | \$41,890 | 51.4% | 820  | \$1,047 | \$41,890 | 51.4% | 820  | \$1,047 | \$41,890 | 51.4% | 820  |
| 39    | Jefferson | Birmingham     | Jefferson County Sewer | 587  | \$1,047 | \$41,890 | 67.9% | 399  | \$1,047 | \$41,890 | 67.9% | 399  | \$1,047 | \$41,890 | 67.9% | 399  |
| 40    | Jefferson | Birmingham     | Jefferson County Sewer | 1429 | \$1,047 | \$41,890 | 78.2% | 1118 | \$1,047 | \$41,890 | 78.2% | 1118 | \$1,047 | \$41,890 | 78.2% | 1118 |
| 42    | Jefferson | Birmingham     | Jefferson County Sewer | 948  | \$1,047 | \$41,890 | 83.2% | 789  | \$1,047 | \$41,890 | 83.2% | 789  | \$1,047 | \$41,890 | 83.2% | 789  |
| 45    | Jefferson | Birmingham     | Jefferson County Sewer | 1297 | \$1,047 | \$41,890 | 76.0% | 986  | \$1,047 | \$41,890 | 76.0% | 986  | \$1,047 | \$41,890 | 76.0% | 986  |
| 47.01 | Jefferson | Birmingham     | Jefferson County Sewer | 2081 | \$1,047 | \$41,890 | 40.0% | 833  | \$1,047 | \$41,890 | 40.0% | 833  | \$1,047 | \$41,890 | 40.0% | 833  |
| 47.02 | Jefferson | Birmingham     | Jefferson County Sewer | 1940 | \$1,047 | \$41,890 | 26.6% | 515  | \$1,047 | \$41,890 | 26.6% | 515  | \$1,047 | \$41,890 | 26.6% | 515  |
| 47.02 | Jefferson | Mountain Brook | Jefferson County Sewer | 21   | \$1,047 | \$41,890 | 26.6% | 6    | \$1,047 | \$41,890 | 26.6% | 6    | \$1,047 | \$41,890 | 26.6% | 6    |
| 48    | Jefferson | Birmingham     | Jefferson County Sewer | 1219 | \$1,047 | \$41,890 | 37.2% | 454  | \$1,047 | \$41,890 | 37.2% | 454  | \$1,047 | \$41,890 | 37.2% | 454  |
| 49.01 | Jefferson | Birmingham     | Jefferson County Sewer | 793  | \$1,047 | \$41,890 | 57.0% | 452  | \$1,047 | \$41,890 | 57.0% | 452  | \$1,047 | \$41,890 | 57.0% | 452  |
| 49.02 | Jefferson | Birmingham     | Jefferson County Sewer | 1782 | \$1,047 | \$41,890 | 53.4% | 952  | \$1,047 | \$41,890 | 53.4% | 952  | \$1,047 | \$41,890 | 53.4% | 952  |
| 50    | Jefferson | Birmingham     | Jefferson County Sewer | 1662 | \$1,047 | \$41,890 | 47.7% | 793  | \$1,047 | \$41,890 | 47.7% | 793  | \$1,047 | \$41,890 | 47.7% | 793  |
| 51.01 | Jefferson | Birmingham     | Jefferson County Sewer | 476  | \$1,047 | \$41,890 | 81.2% | 387  | \$1,047 | \$41,890 | 81.2% | 387  | \$1,047 | \$41,890 | 81.2% | 387  |
| 51.03 | Jefferson | Birmingham     | Jefferson County Sewer | 1174 | \$1,047 | \$41,890 | 46.9% | 550  | \$1,047 | \$41,890 | 46.9% | 550  | \$1,047 | \$41,890 | 46.9% | 550  |
| 51.04 | Jefferson | Birmingham     | Jefferson County Sewer | 1198 | \$1,047 | \$41,890 | 57.4% | 687  | \$1,047 | \$41,890 | 57.4% | 687  | \$1,047 | \$41,890 | 57.4% | 687  |
| 51.04 | Jefferson | Homewood       | Jefferson County Sewer | 506  | \$1,047 | \$41,890 | 57.4% | 291  | \$1,047 | \$41,890 | 57.4% | 291  | \$1,047 | \$41,890 | 57.4% | 291  |
| 52    | Jefferson | Birmingham     | Jefferson County Sewer | 1543 | \$1,047 | \$41,890 | 61.0% | 941  | \$1,047 | \$41,890 | 61.0% | 941  | \$1,047 | \$41,890 | 61.0% | 941  |
| 53.02 | Jefferson | Birmingham     | Jefferson County Sewer | 1604 | \$1,047 | \$41,890 | 26.8% | 430  | \$1,047 | \$41,890 | 26.8% | 430  | \$1,047 | \$41,890 | 26.8% | 430  |
| 55    | Jefferson | Birmingham     | Jefferson County Sewer | 524  | \$1,047 | \$41,890 | 75.0% | 393  | \$1,047 | \$41,890 | 75.0% | 393  | \$1,047 | \$41,890 | 75.0% | 393  |
| 55    | Jefferson | Fultondale     | Jefferson County Sewer | 202  | \$1,047 | \$41,890 | 75.0% | 152  | \$1,047 | \$41,890 | 75.0% | 152  | \$1,047 | \$41,890 | 75.0% | 152  |
| 56    | Jefferson | Birmingham     | Jefferson County Sewer | 2077 | \$1,047 | \$41,890 | 31.7% | 659  | \$1,047 | \$41,890 | 31.7% | 659  | \$1,047 | \$41,890 | 31.7% | 659  |
| 56    | Jefferson | Irondale       | Jefferson County Sewer | 175  | \$1,047 | \$41,890 | 31.7% | 55   | \$1,047 | \$41,890 | 31.7% | 55   | \$1,047 | \$41,890 | 31.7% | 55   |
| 56    | Jefferson | Mountain Brook | Jefferson County Sewer | 54   | \$1,047 | \$41,890 | 31.7% | 17   | \$1,047 | \$41,890 | 31.7% | 17   | \$1,047 | \$41,890 | 31.7% | 17   |
| 57.01 | Jefferson | Birmingham     | Jefferson County Sewer | 923  | \$1,047 | \$41,890 | 59.3% | 548  | \$1,047 | \$41,890 | 59.3% | 548  | \$1,047 | \$41,890 | 59.3% | 548  |
| 57.01 | Jefferson | Midfield       | Jefferson County Sewer | 62   | \$1,047 | \$41,890 | 59.3% | 37   | \$1,047 | \$41,890 | 59.3% | 37   | \$1,047 | \$41,890 | 59.3% | 37   |
| 57.02 | Jefferson | Birmingham     | Jefferson County Sewer | 1229 | \$1,047 | \$41,890 | 73.7% | 906  | \$1,047 | \$41,890 | 73.7% | 906  | \$1,047 | \$41,890 | 73.7% | 906  |
| 58    | Jefferson | Birmingham     | Jefferson County Sewer | 1641 | \$1,047 | \$41,890 | 56.8% | 932  | \$1,047 | \$41,890 | 56.8% | 932  | \$1,047 | \$41,890 | 56.8% | 932  |
| 58    | Jefferson | Homewood       | Jefferson County Sewer | 316  | \$1,047 | \$41,890 | 56.8% | 180  | \$1,047 | \$41,890 | 56.8% | 180  | \$1,047 | \$41,890 | 56.8% | 180  |
| 59.03 | Jefferson | Birmingham     | Jefferson County Sewer | 2207 | \$1,047 | \$41,890 | 44.4% | 980  | \$1,047 | \$41,890 | 44.4% | 980  | \$1,047 | \$41,890 | 44.4% | 980  |
| 59.05 | Jefferson | Birmingham     | Jefferson County Sewer | 2090 | \$1,047 | \$41,890 | 45.1% | 943  | \$1,047 | \$41,890 | 45.1% | 943  | \$1,047 | \$41,890 | 45.1% | 943  |
| 59.05 | Jefferson | Center Point   | Jefferson County Sewer | 56   | \$1,047 | \$41,890 | 45.1% | 25   | \$1,047 | \$41,890 | 45.1% | 25   | \$1,047 | \$41,890 | 45.1% | 25   |

|        |           |                |                        |      |         |          |       |      |         |          |       |      |         |          |       |      |
|--------|-----------|----------------|------------------------|------|---------|----------|-------|------|---------|----------|-------|------|---------|----------|-------|------|
| 59.07  | Jefferson | Birmingham     | Jefferson County Sewer | 829  | \$1,047 | \$41,890 | 28.0% | 232  | \$1,047 | \$41,890 | 28.0% | 232  | \$1,047 | \$41,890 | 28.0% | 232  |
| 59.08  | Jefferson | Birmingham     | Jefferson County Sewer | 866  | \$1,047 | \$41,890 | 62.8% | 544  | \$1,047 | \$41,890 | 62.8% | 544  | \$1,047 | \$41,890 | 62.8% | 544  |
| 59.08  | Jefferson | Center Point   | Jefferson County Sewer | 710  | \$1,047 | \$41,890 | 62.8% | 446  | \$1,047 | \$41,890 | 62.8% | 446  | \$1,047 | \$41,890 | 62.8% | 446  |
| 59.09  | Jefferson | Birmingham     | Jefferson County Sewer | 987  | \$1,047 | \$41,890 | 35.0% | 345  | \$1,047 | \$41,890 | 35.0% | 345  | \$1,047 | \$41,890 | 35.0% | 345  |
| 59.1   | Jefferson | Birmingham     | Jefferson County Sewer | 2061 | \$1,047 | \$41,890 | 35.9% | 741  | \$1,047 | \$41,890 | 35.9% | 741  | \$1,047 | \$41,890 | 35.9% | 741  |
| 59.1   | Jefferson | Center Point   | Jefferson County Sewer | 124  | \$1,047 | \$41,890 | 35.9% | 45   | \$1,047 | \$41,890 | 35.9% | 45   | \$1,047 | \$41,890 | 35.9% | 45   |
| 100.01 | Jefferson | Hueytown       | Jefferson County Sewer | 1889 | \$1,047 | \$41,890 | 53.9% | 1019 | \$1,047 | \$41,890 | 53.9% | 1019 | \$1,047 | \$41,890 | 53.9% | 1019 |
| 100.02 | Jefferson | Hueytown       | Jefferson County Sewer | 1646 | \$1,047 | \$41,890 | 37.3% | 615  | \$1,047 | \$41,890 | 37.3% | 615  | \$1,047 | \$41,890 | 37.3% | 615  |
| 100.02 | Jefferson | Bessemer       | Jefferson County Sewer | 25   | \$1,047 | \$41,890 | 37.3% | 9    | \$1,047 | \$41,890 | 37.3% | 9    | \$1,047 | \$41,890 | 37.3% | 9    |
| 101    | Jefferson | Bessemer       | Jefferson County Sewer | 642  | \$1,047 | \$41,890 | 79.4% | 510  | \$1,047 | \$41,890 | 79.4% | 510  | \$1,047 | \$41,890 | 79.4% | 510  |
| 102    | Jefferson | Bessemer       | Jefferson County Sewer | 908  | \$1,047 | \$41,890 | 57.6% | 523  | \$1,047 | \$41,890 | 57.6% | 523  | \$1,047 | \$41,890 | 57.6% | 523  |
| 103.01 | Jefferson | Bessemer       | Jefferson County Sewer | 1200 | \$1,047 | \$41,890 | 65.0% | 780  | \$1,047 | \$41,890 | 65.0% | 780  | \$1,047 | \$41,890 | 65.0% | 780  |
| 103.02 | Jefferson | Bessemer       | Jefferson County Sewer | 1433 | \$1,047 | \$41,890 | 70.0% | 1003 | \$1,047 | \$41,890 | 70.0% | 1003 | \$1,047 | \$41,890 | 70.0% | 1003 |
| 103.02 | Jefferson | Lipscomb       | Jefferson County Sewer | 126  | \$1,047 | \$41,890 | 70.0% | 88   | \$1,047 | \$41,890 | 70.0% | 88   | \$1,047 | \$41,890 | 70.0% | 88   |
| 104.01 | Jefferson | Bessemer       | Jefferson County Sewer | 1297 | \$1,047 | \$41,890 | 58.4% | 758  | \$1,047 | \$41,890 | 58.4% | 758  | \$1,047 | \$41,890 | 58.4% | 758  |
| 104.02 | Jefferson | Bessemer       | Jefferson County Sewer | 778  | \$1,047 | \$41,890 | 33.1% | 258  | \$1,047 | \$41,890 | 33.1% | 258  | \$1,047 | \$41,890 | 33.1% | 258  |
| 105    | Jefferson | Lipscomb       | Jefferson County Sewer | 422  | \$1,047 | \$41,890 | 64.1% | 271  | \$1,047 | \$41,890 | 64.1% | 271  | \$1,047 | \$41,890 | 64.1% | 271  |
| 105    | Jefferson | Birmingham     | Jefferson County Sewer | 107  | \$1,047 | \$41,890 | 64.1% | 68   | \$1,047 | \$41,890 | 64.1% | 68   | \$1,047 | \$41,890 | 64.1% | 68   |
| 106.02 | Jefferson | Fairfield      | Jefferson County Sewer | 2327 | \$1,047 | \$41,890 | 60.4% | 1405 | \$1,047 | \$41,890 | 60.4% | 1405 | \$1,047 | \$41,890 | 60.4% | 1405 |
| 106.02 | Jefferson | Midfield       | Jefferson County Sewer | 35   | \$1,047 | \$41,890 | 60.4% | 21   | \$1,047 | \$41,890 | 60.4% | 21   | \$1,047 | \$41,890 | 60.4% | 21   |
| 106.03 | Jefferson | Fairfield      | Jefferson County Sewer | 972  | \$1,047 | \$41,890 | 46.5% | 452  | \$1,047 | \$41,890 | 46.5% | 452  | \$1,047 | \$41,890 | 46.5% | 452  |
| 107.01 | Jefferson | Homewood       | Jefferson County Sewer | 572  | \$1,047 | \$41,890 | 31.3% | 179  | \$1,047 | \$41,890 | 31.3% | 179  | \$1,047 | \$41,890 | 31.3% | 179  |
| 107.01 | Jefferson | Birmingham     | Jefferson County Sewer | 41   | \$1,047 | \$41,890 | 31.3% | 13   | \$1,047 | \$41,890 | 31.3% | 13   | \$1,047 | \$41,890 | 31.3% | 13   |
| 107.02 | Jefferson | Homewood       | Jefferson County Sewer | 2106 | \$1,047 | \$41,890 | 21.1% | 445  | \$1,047 | \$41,890 | 21.1% | 445  | \$1,047 | \$41,890 | 21.1% | 445  |
| 107.03 | Jefferson | Homewood       | Jefferson County Sewer | 737  | \$1,047 | \$41,890 | 10.5% | 78   | \$1,047 | \$41,890 | 10.5% | 78   | \$1,047 | \$41,890 | 10.5% | 78   |
| 107.03 | Jefferson | Mountain Brook | Jefferson County Sewer | 125  | \$1,047 | \$41,890 | 10.5% | 13   | \$1,047 | \$41,890 | 10.5% | 13   | \$1,047 | \$41,890 | 10.5% | 13   |
| 107.04 | Jefferson | Homewood       | Jefferson County Sewer | 1212 | \$1,047 | \$41,890 | 27.0% | 327  | \$1,047 | \$41,890 | 27.0% | 327  | \$1,047 | \$41,890 | 27.0% | 327  |
| 107.05 | Jefferson | Homewood       | Jefferson County Sewer | 1405 | \$1,047 | \$41,890 | 13.0% | 183  | \$1,047 | \$41,890 | 13.0% | 183  | \$1,047 | \$41,890 | 13.0% | 183  |
| 107.06 | Jefferson | Homewood       | Jefferson County Sewer | 1648 | \$1,047 | \$41,890 | 34.8% | 574  | \$1,047 | \$41,890 | 34.8% | 574  | \$1,047 | \$41,890 | 34.8% | 574  |
| 107.06 | Jefferson | Birmingham     | Jefferson County Sewer | 698  | \$1,047 | \$41,890 | 34.8% | 243  | \$1,047 | \$41,890 | 34.8% | 243  | \$1,047 | \$41,890 | 34.8% | 243  |
| 108.01 | Jefferson | Mountain Brook | Jefferson County Sewer | 2679 | \$1,047 | \$41,890 | 14.3% | 384  | \$1,047 | \$41,890 | 14.3% | 384  | \$1,047 | \$41,890 | 14.3% | 384  |
| 108.01 | Jefferson | Birmingham     | Jefferson County Sewer | 94   | \$1,047 | \$41,890 | 14.3% | 14   | \$1,047 | \$41,890 | 14.3% | 14   | \$1,047 | \$41,890 | 14.3% | 14   |
| 108.02 | Jefferson | Mountain Brook | Jefferson County Sewer | 786  | \$1,047 | \$41,890 | 12.0% | 94   | \$1,047 | \$41,890 | 12.0% | 94   | \$1,047 | \$41,890 | 12.0% | 94   |
| 108.02 | Jefferson | Birmingham     | Jefferson County Sewer | 256  | \$1,047 | \$41,890 | 12.0% | 31   | \$1,047 | \$41,890 | 12.0% | 31   | \$1,047 | \$41,890 | 12.0% | 31   |
| 108.02 | Jefferson | Homewood       | Jefferson County Sewer | 42   | \$1,047 | \$41,890 | 12.0% | 5    | \$1,047 | \$41,890 | 12.0% | 5    | \$1,047 | \$41,890 | 12.0% | 5    |
| 108.03 | Jefferson | Mountain Brook | Jefferson County Sewer | 1458 | \$1,047 | \$41,890 | 23.6% | 345  | \$1,047 | \$41,890 | 23.6% | 345  | \$1,047 | \$41,890 | 23.6% | 345  |
| 108.03 | Jefferson | Irondale       | Jefferson County Sewer | 888  | \$1,047 | \$41,890 | 23.6% | 210  | \$1,047 | \$41,890 | 23.6% | 210  | \$1,047 | \$41,890 | 23.6% | 210  |
| 108.03 | Jefferson | Birmingham     | Jefferson County Sewer | 198  | \$1,047 | \$41,890 | 23.6% | 47   | \$1,047 | \$41,890 | 23.6% | 47   | \$1,047 | \$41,890 | 23.6% | 47   |

|        |           |                |                        |      |         |          |       |      |         |          |       |      |         |          |       |      |
|--------|-----------|----------------|------------------------|------|---------|----------|-------|------|---------|----------|-------|------|---------|----------|-------|------|
| 108.04 | Jefferson | Mountain Brook | Jefferson County Sewer | 970  | \$1,047 | \$41,890 | 7.7%  | 75   | \$1,047 | \$41,890 | 7.7%  | 75   | \$1,047 | \$41,890 | 7.7%  | 75   |
| 108.04 | Jefferson | Vestavia Hills | Jefferson County Sewer | 100  | \$1,047 | \$41,890 | 7.7%  | 8    | \$1,047 | \$41,890 | 7.7%  | 8    | \$1,047 | \$41,890 | 7.7%  | 8    |
| 108.05 | Jefferson | Mountain Brook | Jefferson County Sewer | 1095 | \$1,047 | \$41,890 | 15.7% | 171  | \$1,047 | \$41,890 | 15.7% | 171  | \$1,047 | \$41,890 | 15.7% | 171  |
| 108.05 | Jefferson | Irondale       | Jefferson County Sewer | 1001 | \$1,047 | \$41,890 | 15.7% | 157  | \$1,047 | \$41,890 | 15.7% | 157  | \$1,047 | \$41,890 | 15.7% | 157  |
| 108.05 | Jefferson | Vestavia Hills | Jefferson County Sewer | 369  | \$1,047 | \$41,890 | 15.7% | 58   | \$1,047 | \$41,890 | 15.7% | 58   | \$1,047 | \$41,890 | 15.7% | 58   |
| 108.05 | Jefferson | Birmingham     | Jefferson County Sewer | 259  | \$1,047 | \$41,890 | 15.7% | 40   | \$1,047 | \$41,890 | 15.7% | 40   | \$1,047 | \$41,890 | 15.7% | 40   |
| 109    | Jefferson | Tarrant        | Jefferson County Sewer | 1733 | \$1,047 | \$41,890 | 60.4% | 1046 | \$1,047 | \$41,890 | 60.4% | 1046 | \$1,047 | \$41,890 | 60.4% | 1046 |
| 110.01 | Jefferson | Leeds          | Jefferson County Sewer | 2281 | \$1,047 | \$41,890 | 27.0% | 616  | \$1,047 | \$41,890 | 27.0% | 616  | \$1,047 | \$41,890 | 27.0% | 616  |
| 110.02 | Jefferson | Leeds          | Jefferson County Sewer | 702  | \$1,047 | \$41,890 | 54.0% | 379  | \$1,047 | \$41,890 | 54.0% | 379  | \$1,047 | \$41,890 | 54.0% | 379  |
| 111.04 | Jefferson | Trussville     | Jefferson County Sewer | 2045 | \$1,047 | \$41,890 | 37.9% | 776  | \$1,047 | \$41,890 | 37.9% | 776  | \$1,047 | \$41,890 | 37.9% | 776  |
| 111.04 | Jefferson | Birmingham     | Jefferson County Sewer | 994  | \$1,047 | \$41,890 | 37.9% | 377  | \$1,047 | \$41,890 | 37.9% | 377  | \$1,047 | \$41,890 | 37.9% | 377  |
| 111.04 | Jefferson | Clay           | Jefferson County Sewer | 119  | \$1,047 | \$41,890 | 37.9% | 45   | \$1,047 | \$41,890 | 37.9% | 45   | \$1,047 | \$41,890 | 37.9% | 45   |
| 111.04 | Jefferson | Center Point   | Jefferson County Sewer | 14   | \$1,047 | \$41,890 | 37.9% | 5    | \$1,047 | \$41,890 | 37.9% | 5    | \$1,047 | \$41,890 | 37.9% | 5    |
| 111.07 | Jefferson | Trussville     | Jefferson County Sewer | 2174 | \$1,047 | \$41,890 | 20.3% | 441  | \$1,047 | \$41,890 | 20.3% | 441  | \$1,047 | \$41,890 | 20.3% | 441  |
| 111.07 | Jefferson | Irondale       | Jefferson County Sewer | 711  | \$1,047 | \$41,890 | 20.3% | 144  | \$1,047 | \$41,890 | 20.3% | 144  | \$1,047 | \$41,890 | 20.3% | 144  |
| 111.07 | Jefferson | Birmingham     | Jefferson County Sewer | 704  | \$1,047 | \$41,890 | 20.3% | 143  | \$1,047 | \$41,890 | 20.3% | 143  | \$1,047 | \$41,890 | 20.3% | 143  |
| 111.07 | Jefferson | Leeds          | Jefferson County Sewer | 377  | \$1,047 | \$41,890 | 20.3% | 76   | \$1,047 | \$41,890 | 20.3% | 76   | \$1,047 | \$41,890 | 20.3% | 76   |
| 111.08 | Jefferson | Trussville     | Jefferson County Sewer | 1689 | \$1,047 | \$41,890 | 22.9% | 387  | \$1,047 | \$41,890 | 22.9% | 387  | \$1,047 | \$41,890 | 22.9% | 387  |
| 111.08 | Jefferson | Birmingham     | Jefferson County Sewer | 181  | \$1,047 | \$41,890 | 22.9% | 41   | \$1,047 | \$41,890 | 22.9% | 41   | \$1,047 | \$41,890 | 22.9% | 41   |
| 111.08 | Jefferson | Irondale       | Jefferson County Sewer | 77   | \$1,047 | \$41,890 | 22.9% | 18   | \$1,047 | \$41,890 | 22.9% | 18   | \$1,047 | \$41,890 | 22.9% | 18   |
| 111.09 | Jefferson | Trussville     | Jefferson County Sewer | 1589 | \$1,047 | \$41,890 | 20.2% | 321  | \$1,047 | \$41,890 | 20.2% | 321  | \$1,047 | \$41,890 | 20.2% | 321  |
| 111.1  | Jefferson | Clay           | Jefferson County Sewer | 1726 | \$1,047 | \$41,890 | 24.2% | 417  | \$1,047 | \$41,890 | 24.2% | 417  | \$1,047 | \$41,890 | 24.2% | 417  |
| 111.1  | Jefferson | Pinson         | Jefferson County Sewer | 173  | \$1,047 | \$41,890 | 24.2% | 42   | \$1,047 | \$41,890 | 24.2% | 42   | \$1,047 | \$41,890 | 24.2% | 42   |
| 111.11 | Jefferson | Trussville     | Jefferson County Sewer | 1828 | \$1,047 | \$41,890 | 17.3% | 317  | \$1,047 | \$41,890 | 17.3% | 317  | \$1,047 | \$41,890 | 17.3% | 317  |
| 111.11 | Jefferson | Clay           | Jefferson County Sewer | 1224 | \$1,047 | \$41,890 | 17.3% | 212  | \$1,047 | \$41,890 | 17.3% | 212  | \$1,047 | \$41,890 | 17.3% | 212  |
| 112.05 | Jefferson | Pinson         | Jefferson County Sewer | 530  | \$1,047 | \$41,890 | 24.0% | 127  | \$1,047 | \$41,890 | 24.0% | 127  | \$1,047 | \$41,890 | 24.0% | 127  |
| 112.05 | Jefferson | Clay           | Jefferson County Sewer | 244  | \$1,047 | \$41,890 | 24.0% | 59   | \$1,047 | \$41,890 | 24.0% | 59   | \$1,047 | \$41,890 | 24.0% | 59   |
| 112.05 | Jefferson | Birmingham     | Jefferson County Sewer | 44   | \$1,047 | \$41,890 | 24.0% | 11   | \$1,047 | \$41,890 | 24.0% | 11   | \$1,047 | \$41,890 | 24.0% | 11   |
| 112.06 | Jefferson | Pinson         | Jefferson County Sewer | 1834 | \$1,047 | \$41,890 | 26.8% | 491  | \$1,047 | \$41,890 | 26.8% | 491  | \$1,047 | \$41,890 | 26.8% | 491  |
| 112.06 | Jefferson | Clay           | Jefferson County Sewer | 234  | \$1,047 | \$41,890 | 26.8% | 63   | \$1,047 | \$41,890 | 26.8% | 63   | \$1,047 | \$41,890 | 26.8% | 63   |
| 112.07 | Jefferson | Center Point   | Jefferson County Sewer | 1245 | \$1,047 | \$41,890 | 41.6% | 519  | \$1,047 | \$41,890 | 41.6% | 519  | \$1,047 | \$41,890 | 41.6% | 519  |
| 112.07 | Jefferson | Birmingham     | Jefferson County Sewer | 439  | \$1,047 | \$41,890 | 41.6% | 183  | \$1,047 | \$41,890 | 41.6% | 183  | \$1,047 | \$41,890 | 41.6% | 183  |
| 112.07 | Jefferson | Pinson         | Jefferson County Sewer | 125  | \$1,047 | \$41,890 | 41.6% | 52   | \$1,047 | \$41,890 | 41.6% | 52   | \$1,047 | \$41,890 | 41.6% | 52   |
| 112.07 | Jefferson | Clay           | Jefferson County Sewer | 66   | \$1,047 | \$41,890 | 41.6% | 28   | \$1,047 | \$41,890 | 41.6% | 28   | \$1,047 | \$41,890 | 41.6% | 28   |
| 112.08 | Jefferson | Clay           | Jefferson County Sewer | 884  | \$1,047 | \$41,890 | 27.8% | 246  | \$1,047 | \$41,890 | 27.8% | 246  | \$1,047 | \$41,890 | 27.8% | 246  |
| 112.08 | Jefferson | Pinson         | Jefferson County Sewer | 586  | \$1,047 | \$41,890 | 27.8% | 163  | \$1,047 | \$41,890 | 27.8% | 163  | \$1,047 | \$41,890 | 27.8% | 163  |
| 112.09 | Jefferson | Birmingham     | Jefferson County Sewer | 644  | \$1,047 | \$41,890 | 53.3% | 343  | \$1,047 | \$41,890 | 53.3% | 343  | \$1,047 | \$41,890 | 53.3% | 343  |
| 112.09 | Jefferson | Center Point   | Jefferson County Sewer | 587  | \$1,047 | \$41,890 | 53.3% | 313  | \$1,047 | \$41,890 | 53.3% | 313  | \$1,047 | \$41,890 | 53.3% | 313  |
| 112.1  | Jefferson | Pinson         | Jefferson County Sewer | 875  | \$1,047 | \$41,890 | 56.1% | 491  | \$1,047 | \$41,890 | 56.1% | 491  | \$1,047 | \$41,890 | 56.1% | 491  |
| 112.1  | Jefferson | Center Point   | Jefferson County Sewer | 359  | \$1,047 | \$41,890 | 56.1% | 201  | \$1,047 | \$41,890 | 56.1% | 201  | \$1,047 | \$41,890 | 56.1% | 201  |

|        |           |                |                           |      |         |          |       |      |         |           |        |      |         |          |       |      |
|--------|-----------|----------------|---------------------------|------|---------|----------|-------|------|---------|-----------|--------|------|---------|----------|-------|------|
| 112.1  | Jefferson | Birmingham     | Jefferson County Sewer    | 259  | \$1,047 | \$41,890 | 56.1% | 145  | \$1,047 | \$41,890  | 56.1%  | 145  | \$1,047 | \$41,890 | 56.1% | 145  |
| 113.01 | Jefferson | Unincorporated | OWTS                      | 743  | \$530   | \$21,192 | 18.1% | 135  | \$5,000 | \$200,000 | 99.9%  | 743  | \$100   | \$4,000  | 3.1%  | 23   |
| 113.01 | Jefferson | Trafford       | OWTS                      | 53   | \$530   | \$21,194 | 18.1% | 10   | \$5,000 | \$200,000 | 99.9%  | 53   | \$100   | \$4,000  | 3.1%  | 2    |
| 113.01 | Jefferson | County Line    | OWTS                      | 14   | \$530   | \$21,194 | 18.1% | 3    | \$5,000 | \$200,000 | 99.9%  | 14   | \$100   | \$4,000  | 3.1%  | 0    |
| 113.01 | Jefferson | Pinson         | Jefferson County Sewer    | 426  | \$1,047 | \$41,890 | 41.3% | 176  | \$1,047 | \$41,890  | 41.3%  | 176  | \$1,047 | \$41,890 | 41.3% | 176  |
| 113.02 | Jefferson | Unincorporated | OWTS                      | 182  | \$530   | \$21,192 | 9.8%  | 18   | \$5,000 | \$200,000 | 100.0% | 182  | \$100   | \$4,000  | 1.4%  | 2    |
| 113.02 | Jefferson | Kimberly       | OWTS                      | 593  | \$530   | \$21,194 | 9.8%  | 58   | \$5,000 | \$200,000 | 100.0% | 593  | \$100   | \$4,000  | 1.4%  | 8    |
| 113.02 | Jefferson | Morris         | OWTS                      | 282  | \$530   | \$21,194 | 9.8%  | 28   | \$5,000 | \$200,000 | 100.0% | 282  | \$100   | \$4,000  | 1.4%  | 4    |
| 113.02 | Jefferson | Trafford       | OWTS                      | 117  | \$530   | \$21,194 | 9.8%  | 11   | \$5,000 | \$200,000 | 100.0% | 117  | \$100   | \$4,000  | 1.4%  | 2    |
| 113.02 | Jefferson | Warrior        | Jefferson County Sewer    | 1207 | \$1,047 | \$41,890 | 26.9% | 324  | \$1,047 | \$41,890  | 26.9%  | 324  | \$1,047 | \$41,890 | 26.9% | 324  |
| 114    | Jefferson | Warrior        | Jefferson County Sewer    | 2939 | \$1,047 | \$41,890 | 47.5% | 1395 | \$1,047 | \$41,890  | 47.5%  | 1395 | \$1,047 | \$41,890 | 47.5% | 1395 |
| 115    | Jefferson | Unincorporated | OWTS                      | 2059 | \$530   | \$21,192 | 17.2% | 354  | \$5,000 | \$200,000 | 100.0% | 2059 | \$100   | \$4,000  | 2.2%  | 44   |
| 115    | Jefferson | West Jefferson | OWTS                      | 8    | \$530   | \$21,194 | 17.2% | 1    | \$5,000 | \$200,000 | 100.0% | 8    | \$100   | \$4,000  | 2.2%  | 0    |
| 115    | Jefferson | Adamsville     | Jefferson County Sewer    | 151  | \$1,047 | \$41,890 | 40.4% | 61   | \$1,047 | \$41,890  | 40.4%  | 61   | \$1,047 | \$41,890 | 40.4% | 61   |
| 115    | Jefferson | Sumiton        | Sumiton Water Works Board | 5    | \$489   | \$19,560 | 15.8% | 1    | \$489   | \$19,560  | 15.8%  | 1    | \$489   | \$19,560 | 15.8% | 1    |
| 116    | Jefferson | Brookside      | Jefferson County Sewer    | 685  | \$1,047 | \$41,890 | 39.8% | 273  | \$1,047 | \$41,890  | 39.8%  | 273  | \$1,047 | \$41,890 | 39.8% | 273  |
| 116    | Jefferson | Graysville     | Jefferson County Sewer    | 626  | \$1,047 | \$41,890 | 39.8% | 249  | \$1,047 | \$41,890  | 39.8%  | 249  | \$1,047 | \$41,890 | 39.8% | 249  |
| 116    | Jefferson | Gardendale     | Jefferson County Sewer    | 70   | \$1,047 | \$41,890 | 39.8% | 28   | \$1,047 | \$41,890  | 39.8%  | 28   | \$1,047 | \$41,890 | 39.8% | 28   |
| 116    | Jefferson | Adamsville     | Jefferson County Sewer    | 29   | \$1,047 | \$41,890 | 39.8% | 12   | \$1,047 | \$41,890  | 39.8%  | 12   | \$1,047 | \$41,890 | 39.8% | 12   |
| 117.03 | Jefferson | Gardendale     | Jefferson County Sewer    | 3341 | \$1,047 | \$41,890 | 31.1% | 1038 | \$1,047 | \$41,890  | 31.1%  | 1038 | \$1,047 | \$41,890 | 31.1% | 1038 |
| 117.03 | Jefferson | Fultondale     | Jefferson County Sewer    | 630  | \$1,047 | \$41,890 | 31.1% | 196  | \$1,047 | \$41,890  | 31.1%  | 196  | \$1,047 | \$41,890 | 31.1% | 196  |
| 117.04 | Jefferson | Gardendale     | Jefferson County Sewer    | 1470 | \$1,047 | \$41,890 | 31.8% | 467  | \$1,047 | \$41,890  | 31.8%  | 467  | \$1,047 | \$41,890 | 31.8% | 467  |
| 117.05 | Jefferson | Gardendale     | Jefferson County Sewer    | 2363 | \$1,047 | \$41,890 | 27.6% | 652  | \$1,047 | \$41,890  | 27.6%  | 652  | \$1,047 | \$41,890 | 27.6% | 652  |
| 117.05 | Jefferson | Fultondale     | Jefferson County Sewer    | 478  | \$1,047 | \$41,890 | 27.6% | 132  | \$1,047 | \$41,890  | 27.6%  | 132  | \$1,047 | \$41,890 | 27.6% | 132  |
| 117.06 | Jefferson | Pinson         | Jefferson County Sewer    | 453  | \$1,047 | \$41,890 | 38.3% | 174  | \$1,047 | \$41,890  | 38.3%  | 174  | \$1,047 | \$41,890 | 38.3% | 174  |
| 117.06 | Jefferson | Fultondale     | Jefferson County Sewer    | 228  | \$1,047 | \$41,890 | 38.3% | 87   | \$1,047 | \$41,890  | 38.3%  | 87   | \$1,047 | \$41,890 | 38.3% | 87   |
| 117.06 | Jefferson | Gardendale     | Jefferson County Sewer    | 184  | \$1,047 | \$41,890 | 38.3% | 71   | \$1,047 | \$41,890  | 38.3%  | 71   | \$1,047 | \$41,890 | 38.3% | 71   |
| 118.02 | Jefferson | Center Point   | Jefferson County Sewer    | 2569 | \$1,047 | \$41,890 | 49.4% | 1268 | \$1,047 | \$41,890  | 49.4%  | 1268 | \$1,047 | \$41,890 | 49.4% | 1268 |
| 118.02 | Jefferson | Clay           | Jefferson County Sewer    | 373  | \$1,047 | \$41,890 | 49.4% | 184  | \$1,047 | \$41,890  | 49.4%  | 184  | \$1,047 | \$41,890 | 49.4% | 184  |
| 118.03 | Jefferson | Center Point   | Jefferson County Sewer    | 1328 | \$1,047 | \$41,890 | 51.7% | 686  | \$1,047 | \$41,890  | 51.7%  | 686  | \$1,047 | \$41,890 | 51.7% | 686  |
| 118.03 | Jefferson | Birmingham     | Jefferson County Sewer    | 347  | \$1,047 | \$41,890 | 51.7% | 179  | \$1,047 | \$41,890  | 51.7%  | 179  | \$1,047 | \$41,890 | 51.7% | 179  |
| 118.04 | Jefferson | Center Point   | Jefferson County Sewer    | 858  | \$1,047 | \$41,890 | 56.4% | 484  | \$1,047 | \$41,890  | 56.4%  | 484  | \$1,047 | \$41,890 | 56.4% | 484  |
| 118.04 | Jefferson | Birmingham     | Jefferson County Sewer    | 280  | \$1,047 | \$41,890 | 56.4% | 158  | \$1,047 | \$41,890  | 56.4%  | 158  | \$1,047 | \$41,890 | 56.4% | 158  |
| 119.01 | Jefferson | Fultondale     | Jefferson County Sewer    | 437  | \$1,047 | \$41,890 | 69.4% | 303  | \$1,047 | \$41,890  | 69.4%  | 303  | \$1,047 | \$41,890 | 69.4% | 303  |
| 119.01 | Jefferson | Gardendale     | Jefferson County Sewer    | 220  | \$1,047 | \$41,890 | 69.4% | 153  | \$1,047 | \$41,890  | 69.4%  | 153  | \$1,047 | \$41,890 | 69.4% | 153  |
| 119.01 | Jefferson | Tarrant        | Jefferson County Sewer    | 188  | \$1,047 | \$41,890 | 69.4% | 130  | \$1,047 | \$41,890  | 69.4%  | 130  | \$1,047 | \$41,890 | 69.4% | 130  |
| 119.01 | Jefferson | Birmingham     | Jefferson County Sewer    | 187  | \$1,047 | \$41,890 | 69.4% | 130  | \$1,047 | \$41,890  | 69.4%  | 130  | \$1,047 | \$41,890 | 69.4% | 130  |
| 119.04 | Jefferson | Tarrant        | Jefferson County Sewer    | 430  | \$1,047 | \$41,890 | 43.2% | 186  | \$1,047 | \$41,890  | 43.2%  | 186  | \$1,047 | \$41,890 | 43.2% | 186  |
| 119.04 | Jefferson | Birmingham     | Jefferson County Sewer    | 402  | \$1,047 | \$41,890 | 43.2% | 174  | \$1,047 | \$41,890  | 43.2%  | 174  | \$1,047 | \$41,890 | 43.2% | 174  |
| 120.01 | Jefferson | Birmingham     | Jefferson County Sewer    | 923  | \$1,047 | \$41,890 | 33.0% | 305  | \$1,047 | \$41,890  | 33.0%  | 305  | \$1,047 | \$41,890 | 33.0% | 305  |
| 120.01 | Jefferson | Adamsville     | Jefferson County Sewer    | 352  | \$1,047 | \$41,890 | 33.0% | 116  | \$1,047 | \$41,890  | 33.0%  | 116  | \$1,047 | \$41,890 | 33.0% | 116  |



|        |           |                |                        |      |         |          |       |     |         |           |        |      |         |          |       |     |
|--------|-----------|----------------|------------------------|------|---------|----------|-------|-----|---------|-----------|--------|------|---------|----------|-------|-----|
| 120.01 | Jefferson | Brookside      | Jefferson County Sewer | 216  | \$1,047 | \$41,890 | 33.0% | 71  | \$1,047 | \$41,890  | 33.0%  | 71   | \$1,047 | \$41,890 | 33.0% | 71  |
| 120.01 | Jefferson | Graysville     | Jefferson County Sewer | 54   | \$1,047 | \$41,890 | 33.0% | 18  | \$1,047 | \$41,890  | 33.0%  | 18   | \$1,047 | \$41,890 | 33.0% | 18  |
| 120.01 | Jefferson | Gardendale     | Jefferson County Sewer | 50   | \$1,047 | \$41,890 | 33.0% | 17  | \$1,047 | \$41,890  | 33.0%  | 17   | \$1,047 | \$41,890 | 33.0% | 17  |
| 120.02 | Jefferson | Fultondale     | Jefferson County Sewer | 1987 | \$1,047 | \$41,890 | 29.6% | 589 | \$1,047 | \$41,890  | 29.6%  | 589  | \$1,047 | \$41,890 | 29.6% | 589 |
| 120.02 | Jefferson | Birmingham     | Jefferson County Sewer | 1233 | \$1,047 | \$41,890 | 29.6% | 365 | \$1,047 | \$41,890  | 29.6%  | 365  | \$1,047 | \$41,890 | 29.6% | 365 |
| 120.02 | Jefferson | Tarrant        | Jefferson County Sewer | 56   | \$1,047 | \$41,890 | 29.6% | 17  | \$1,047 | \$41,890  | 29.6%  | 17   | \$1,047 | \$41,890 | 29.6% | 17  |
| 121.03 | Jefferson | Graysville     | Jefferson County Sewer | 936  | \$1,047 | \$41,890 | 38.3% | 358 | \$1,047 | \$41,890  | 38.3%  | 358  | \$1,047 | \$41,890 | 38.3% | 358 |
| 121.03 | Jefferson | Adamsville     | Jefferson County Sewer | 624  | \$1,047 | \$41,890 | 38.3% | 239 | \$1,047 | \$41,890  | 38.3%  | 239  | \$1,047 | \$41,890 | 38.3% | 239 |
| 121.04 | Jefferson | Adamsville     | Jefferson County Sewer | 503  | \$1,047 | \$41,890 | 45.4% | 228 | \$1,047 | \$41,890  | 45.4%  | 228  | \$1,047 | \$41,890 | 45.4% | 228 |
| 121.04 | Jefferson | Graysville     | Jefferson County Sewer | 398  | \$1,047 | \$41,890 | 45.4% | 181 | \$1,047 | \$41,890  | 45.4%  | 181  | \$1,047 | \$41,890 | 45.4% | 181 |
| 122    | Jefferson | Birmingham     | Jefferson County Sewer | 943  | \$1,047 | \$41,890 | 37.6% | 354 | \$1,047 | \$41,890  | 37.6%  | 354  | \$1,047 | \$41,890 | 37.6% | 354 |
| 123.02 | Jefferson | Birmingham     | Jefferson County Sewer | 1262 | \$1,047 | \$41,890 | 29.0% | 366 | \$1,047 | \$41,890  | 29.0%  | 366  | \$1,047 | \$41,890 | 29.0% | 366 |
| 123.02 | Jefferson | Adamsville     | Jefferson County Sewer | 156  | \$1,047 | \$41,890 | 29.0% | 45  | \$1,047 | \$41,890  | 29.0%  | 45   | \$1,047 | \$41,890 | 29.0% | 45  |
| 123.04 | Jefferson | Unincorporated | OWTS                   | 47   | \$530   | \$21,192 | 9.3%  | 4   | \$5,000 | \$200,000 | 100.0% | 47   | \$100   | \$4,000  | 1.4%  | 1   |
| 123.04 | Jefferson | Pleasant Grove | OWTS                   | 854  | \$530   | \$21,194 | 9.3%  | 80  | \$5,000 | \$200,000 | 100.0% | 854  | \$100   | \$4,000  | 1.4%  | 12  |
| 123.05 | Jefferson | Pleasant Grove | OWTS                   | 1484 | \$530   | \$21,194 | 6.2%  | 92  | \$5,000 | \$200,000 | 100.0% | 1484 | \$100   | \$4,000  | 1.2%  | 18  |
| 123.05 | Jefferson | Birmingham     | Jefferson County Sewer | 847  | \$1,047 | \$41,890 | 20.6% | 174 | \$1,047 | \$41,890  | 20.6%  | 174  | \$1,047 | \$41,890 | 20.6% | 174 |
| 123.05 | Jefferson | Hueytown       | Jefferson County Sewer | 482  | \$1,047 | \$41,890 | 20.6% | 99  | \$1,047 | \$41,890  | 20.6%  | 99   | \$1,047 | \$41,890 | 20.6% | 99  |
| 124.01 | Jefferson | Birmingham     | Jefferson County Sewer | 1536 | \$1,047 | \$41,890 | 25.2% | 387 | \$1,047 | \$41,890  | 25.2%  | 387  | \$1,047 | \$41,890 | 25.2% | 387 |
| 124.02 | Jefferson | Adamsville     | Jefferson County Sewer | 919  | \$1,047 | \$41,890 | 45.2% | 415 | \$1,047 | \$41,890  | 45.2%  | 415  | \$1,047 | \$41,890 | 45.2% | 415 |
| 124.02 | Jefferson | Birmingham     | Jefferson County Sewer | 226  | \$1,047 | \$41,890 | 45.2% | 102 | \$1,047 | \$41,890  | 45.2%  | 102  | \$1,047 | \$41,890 | 45.2% | 102 |
| 124.03 | Jefferson | Adamsville     | Jefferson County Sewer | 1152 | \$1,047 | \$41,890 | 42.9% | 494 | \$1,047 | \$41,890  | 42.9%  | 494  | \$1,047 | \$41,890 | 42.9% | 494 |
| 125    | Jefferson | Birmingham     | Jefferson County Sewer | 1173 | \$1,047 | \$41,890 | 53.0% | 622 | \$1,047 | \$41,890  | 53.0%  | 622  | \$1,047 | \$41,890 | 53.0% | 622 |
| 125    | Jefferson | Adamsville     | Jefferson County Sewer | 248  | \$1,047 | \$41,890 | 53.0% | 132 | \$1,047 | \$41,890  | 53.0%  | 132  | \$1,047 | \$41,890 | 53.0% | 132 |
| 126.02 | Jefferson | Irondale       | Jefferson County Sewer | 653  | \$1,047 | \$41,890 | 46.6% | 304 | \$1,047 | \$41,890  | 46.6%  | 304  | \$1,047 | \$41,890 | 46.6% | 304 |
| 126.02 | Jefferson | Birmingham     | Jefferson County Sewer | 618  | \$1,047 | \$41,890 | 46.6% | 288 | \$1,047 | \$41,890  | 46.6%  | 288  | \$1,047 | \$41,890 | 46.6% | 288 |
| 127.01 | Jefferson | Irondale       | Jefferson County Sewer | 590  | \$1,047 | \$41,890 | 41.2% | 243 | \$1,047 | \$41,890  | 41.2%  | 243  | \$1,047 | \$41,890 | 41.2% | 243 |
| 127.01 | Jefferson | Leeds          | Jefferson County Sewer | 358  | \$1,047 | \$41,890 | 41.2% | 147 | \$1,047 | \$41,890  | 41.2%  | 147  | \$1,047 | \$41,890 | 41.2% | 147 |
| 127.01 | Jefferson | Birmingham     | Jefferson County Sewer | 323  | \$1,047 | \$41,890 | 41.2% | 133 | \$1,047 | \$41,890  | 41.2%  | 133  | \$1,047 | \$41,890 | 41.2% | 133 |
| 127.01 | Jefferson | Birmingham     | Jefferson County Sewer | 35   | \$1,047 | \$41,890 | 41.2% | 14  | \$1,047 | \$41,890  | 41.2%  | 14   | \$1,047 | \$41,890 | 41.2% | 14  |
| 127.01 | Jefferson | Irondale       | Jefferson County Sewer | 35   | \$1,047 | \$41,890 | 41.2% | 14  | \$1,047 | \$41,890  | 41.2%  | 14   | \$1,047 | \$41,890 | 41.2% | 14  |
| 127.03 | Jefferson | Birmingham     | Jefferson County Sewer | 1105 | \$1,047 | \$41,890 | 12.0% | 133 | \$1,047 | \$41,890  | 12.0%  | 133  | \$1,047 | \$41,890 | 12.0% | 133 |
| 127.03 | Jefferson | Vestavia Hills | Jefferson County Sewer | 1103 | \$1,047 | \$41,890 | 12.0% | 132 | \$1,047 | \$41,890  | 12.0%  | 132  | \$1,047 | \$41,890 | 12.0% | 132 |
| 127.03 | Jefferson | Irondale       | Jefferson County Sewer | 39   | \$1,047 | \$41,890 | 12.0% | 5   | \$1,047 | \$41,890  | 12.0%  | 5    | \$1,047 | \$41,890 | 12.0% | 5   |
| 127.03 | Jefferson | Mountain Brook | Jefferson County Sewer | 29   | \$1,047 | \$41,890 | 12.0% | 3   | \$1,047 | \$41,890  | 12.0%  | 3    | \$1,047 | \$41,890 | 12.0% | 3   |
| 127.04 | Jefferson | Birmingham     | Jefferson County Sewer | 386  | \$1,047 | \$41,890 | 24.0% | 93  | \$1,047 | \$41,890  | 24.0%  | 93   | \$1,047 | \$41,890 | 24.0% | 93  |
| 127.04 | Jefferson | Leeds          | Jefferson County Sewer | 357  | \$1,047 | \$41,890 | 24.0% | 86  | \$1,047 | \$41,890  | 24.0%  | 86   | \$1,047 | \$41,890 | 24.0% | 86  |
| 127.04 | Jefferson | Irondale       | Jefferson County Sewer | 210  | \$1,047 | \$41,890 | 24.0% | 50  | \$1,047 | \$41,890  | 24.0%  | 50   | \$1,047 | \$41,890 | 24.0% | 50  |
| 127.04 | Jefferson | Hoover         | City of Hoover         | 3    | \$441   | \$17,626 | 5.4%  | 0   | \$441   | \$17,626  | 5.4%   | 0    | \$441   | \$17,626 | 5.4%  | 0   |
| 128.02 | Jefferson | Vestavia Hills | Jefferson County Sewer | 694  | \$1,047 | \$41,890 | 21.7% | 151 | \$1,047 | \$41,890  | 21.7%  | 151  | \$1,047 | \$41,890 | 21.7% | 151 |

|        |           |                |                        |      |         |          |       |     |         |           |        |      |         |          |       |     |
|--------|-----------|----------------|------------------------|------|---------|----------|-------|-----|---------|-----------|--------|------|---------|----------|-------|-----|
| 128.02 | Jefferson | Mountain Brook | Jefferson County Sewer | 387  | \$1,047 | \$41,890 | 21.7% | 84  | \$1,047 | \$41,890  | 21.7%  | 84   | \$1,047 | \$41,890 | 21.7% | 84  |
| 128.02 | Jefferson | Birmingham     | Jefferson County Sewer | 54   | \$1,047 | \$41,890 | 21.7% | 12  | \$1,047 | \$41,890  | 21.7%  | 12   | \$1,047 | \$41,890 | 21.7% | 12  |
| 128.03 | Jefferson | Vestavia Hills | Jefferson County Sewer | 1220 | \$1,047 | \$41,890 | 24.7% | 302 | \$1,047 | \$41,890  | 24.7%  | 302  | \$1,047 | \$41,890 | 24.7% | 302 |
| 128.03 | Jefferson | Birmingham     | Jefferson County Sewer | 753  | \$1,047 | \$41,890 | 24.7% | 186 | \$1,047 | \$41,890  | 24.7%  | 186  | \$1,047 | \$41,890 | 24.7% | 186 |
| 128.03 | Jefferson | Mountain Brook | Jefferson County Sewer | 419  | \$1,047 | \$41,890 | 24.7% | 104 | \$1,047 | \$41,890  | 24.7%  | 104  | \$1,047 | \$41,890 | 24.7% | 104 |
| 129.05 | Jefferson | Vestavia Hills | Jefferson County Sewer | 1144 | \$1,047 | \$41,890 | 14.6% | 167 | \$1,047 | \$41,890  | 14.6%  | 167  | \$1,047 | \$41,890 | 14.6% | 167 |
| 129.05 | Jefferson | Homewood       | Jefferson County Sewer | 174  | \$1,047 | \$41,890 | 14.6% | 26  | \$1,047 | \$41,890  | 14.6%  | 26   | \$1,047 | \$41,890 | 14.6% | 26  |
| 129.05 | Jefferson | Mountain Brook | Jefferson County Sewer | 152  | \$1,047 | \$41,890 | 14.6% | 22  | \$1,047 | \$41,890  | 14.6%  | 22   | \$1,047 | \$41,890 | 14.6% | 22  |
| 129.06 | Jefferson | Vestavia Hills | Jefferson County Sewer | 2590 | \$1,047 | \$41,890 | 24.2% | 626 | \$1,047 | \$41,890  | 24.2%  | 626  | \$1,047 | \$41,890 | 24.2% | 626 |
| 129.06 | Jefferson | Hoover         | City of Hoover         | 6    | \$441   | \$17,626 | 5.9%  | 0   | \$441   | \$17,626  | 5.9%   | 0    | \$441   | \$17,626 | 5.9%  | 0   |
| 129.07 | Jefferson | Vestavia Hills | Jefferson County Sewer | 1991 | \$1,047 | \$41,890 | 27.3% | 544 | \$1,047 | \$41,890  | 27.3%  | 544  | \$1,047 | \$41,890 | 27.3% | 544 |
| 129.07 | Jefferson | Hoover         | City of Hoover         | 178  | \$441   | \$17,626 | 5.6%  | 10  | \$441   | \$17,626  | 5.6%   | 10   | \$441   | \$17,626 | 5.6%  | 10  |
| 129.08 | Jefferson | Unincorporated | OWTS                   | 1848 | \$530   | \$21,192 | 11.9% | 220 | \$5,000 | \$200,000 | 99.8%  | 1848 | \$100   | \$4,000  | 2.9%  | 53  |
| 129.08 | Jefferson | Hoover         | City of Hoover         | 174  | \$441   | \$17,626 | 10.4% | 18  | \$441   | \$17,626  | 10.4%  | 18   | \$441   | \$17,626 | 10.4% | 18  |
| 129.1  | Jefferson | Birmingham     | Jefferson County Sewer | 986  | \$1,047 | \$41,890 | 21.6% | 213 | \$1,047 | \$41,890  | 21.6%  | 213  | \$1,047 | \$41,890 | 21.6% | 213 |
| 129.1  | Jefferson | Vestavia Hills | Jefferson County Sewer | 986  | \$1,047 | \$41,890 | 21.6% | 213 | \$1,047 | \$41,890  | 21.6%  | 213  | \$1,047 | \$41,890 | 21.6% | 213 |
| 129.1  | Jefferson | Hoover         | City of Hoover         | 21   | \$441   | \$17,626 | 7.8%  | 2   | \$441   | \$17,626  | 7.8%   | 2    | \$441   | \$17,626 | 7.8%  | 2   |
| 129.11 | Jefferson | Vestavia Hills | Jefferson County Sewer | 1200 | \$1,047 | \$41,890 | 5.5%  | 66  | \$1,047 | \$41,890  | 5.5%   | 66   | \$1,047 | \$41,890 | 5.5%  | 66  |
| 129.11 | Jefferson | Mountain Brook | Jefferson County Sewer | 498  | \$1,047 | \$41,890 | 5.5%  | 27  | \$1,047 | \$41,890  | 5.5%   | 27   | \$1,047 | \$41,890 | 5.5%  | 27  |
| 129.11 | Jefferson | Birmingham     | Jefferson County Sewer | 126  | \$1,047 | \$41,890 | 5.5%  | 7   | \$1,047 | \$41,890  | 5.5%   | 7    | \$1,047 | \$41,890 | 5.5%  | 7   |
| 129.12 | Jefferson | Unincorporated | OWTS                   | 2199 | \$530   | \$21,192 | 19.4% | 427 | \$5,000 | \$200,000 | 99.9%  | 2199 | \$100   | \$4,000  | 2.4%  | 54  |
| 129.12 | Jefferson | Hoover         | City of Hoover         | 89   | \$441   | \$17,626 | 14.2% | 13  | \$441   | \$17,626  | 14.2%  | 13   | \$441   | \$17,626 | 14.2% | 13  |
| 129.13 | Jefferson | Unincorporated | OWTS                   | 1457 | \$530   | \$21,192 | 9.5%  | 139 | \$5,000 | \$200,000 | 100.0% | 1457 | \$100   | \$4,000  | 1.4%  | 20  |
| 129.13 | Jefferson | Hoover         | City of Hoover         | 91   | \$441   | \$17,626 | 7.3%  | 7   | \$441   | \$17,626  | 7.3%   | 7    | \$441   | \$17,626 | 7.3%  | 7   |
| 129.14 | Jefferson | Homewood       | Jefferson County Sewer | 704  | \$1,047 | \$41,890 | 38.4% | 270 | \$1,047 | \$41,890  | 38.4%  | 270  | \$1,047 | \$41,890 | 38.4% | 270 |
| 129.14 | Jefferson | Vestavia Hills | Jefferson County Sewer | 279  | \$1,047 | \$41,890 | 38.4% | 107 | \$1,047 | \$41,890  | 38.4%  | 107  | \$1,047 | \$41,890 | 38.4% | 107 |
| 129.15 | Jefferson | Vestavia Hills | Jefferson County Sewer | 2481 | \$1,047 | \$41,890 | 22.6% | 561 | \$1,047 | \$41,890  | 22.6%  | 561  | \$1,047 | \$41,890 | 22.6% | 561 |
| 130.02 | Jefferson | Birmingham     | Jefferson County Sewer | 807  | \$1,047 | \$41,890 | 68.1% | 550 | \$1,047 | \$41,890  | 68.1%  | 550  | \$1,047 | \$41,890 | 68.1% | 550 |
| 131    | Jefferson | Birmingham     | Jefferson County Sewer | 1466 | \$1,047 | \$41,890 | 62.3% | 913 | \$1,047 | \$41,890  | 62.3%  | 913  | \$1,047 | \$41,890 | 62.3% | 913 |
| 131    | Jefferson | Midfield       | Jefferson County Sewer | 85   | \$1,047 | \$41,890 | 62.3% | 53  | \$1,047 | \$41,890  | 62.3%  | 53   | \$1,047 | \$41,890 | 62.3% | 53  |
| 132    | Jefferson | Midfield       | Jefferson County Sewer | 750  | \$1,047 | \$41,890 | 52.8% | 396 | \$1,047 | \$41,890  | 52.8%  | 396  | \$1,047 | \$41,890 | 52.8% | 396 |
| 132    | Jefferson | Fairfield      | Jefferson County Sewer | 54   | \$1,047 | \$41,890 | 52.8% | 28  | \$1,047 | \$41,890  | 52.8%  | 28   | \$1,047 | \$41,890 | 52.8% | 28  |
| 133    | Jefferson | Birmingham     | Jefferson County Sewer | 523  | \$1,047 | \$41,890 | 62.1% | 325 | \$1,047 | \$41,890  | 62.1%  | 325  | \$1,047 | \$41,890 | 62.1% | 325 |
| 133    | Jefferson | Lipscomb       | Jefferson County Sewer | 222  | \$1,047 | \$41,890 | 62.1% | 138 | \$1,047 | \$41,890  | 62.1%  | 138  | \$1,047 | \$41,890 | 62.1% | 138 |
| 133    | Jefferson | Bessemer       | Jefferson County Sewer | 217  | \$1,047 | \$41,890 | 62.1% | 135 | \$1,047 | \$41,890  | 62.1%  | 135  | \$1,047 | \$41,890 | 62.1% | 135 |
| 133    | Jefferson | Midfield       | Jefferson County Sewer | 104  | \$1,047 | \$41,890 | 62.1% | 64  | \$1,047 | \$41,890  | 62.1%  | 64   | \$1,047 | \$41,890 | 62.1% | 64  |
| 133    | Jefferson | Brighton       | Jefferson County Sewer | 96   | \$1,047 | \$41,890 | 62.1% | 60  | \$1,047 | \$41,890  | 62.1%  | 60   | \$1,047 | \$41,890 | 62.1% | 60  |
| 134    | Jefferson | Midfield       | Jefferson County Sewer | 985  | \$1,047 | \$41,890 | 48.6% | 478 | \$1,047 | \$41,890  | 48.6%  | 478  | \$1,047 | \$41,890 | 48.6% | 478 |

|        |           |                |                                |      |         |          |       |      |         |           |        |      |         |          |       |      |
|--------|-----------|----------------|--------------------------------|------|---------|----------|-------|------|---------|-----------|--------|------|---------|----------|-------|------|
| 134    | Jefferson | Fairfield      | Jefferson County Sewer         | 909  | \$1,047 | \$41,890 | 48.6% | 442  | \$1,047 | \$41,890  | 48.6%  | 442  | \$1,047 | \$41,890 | 48.6% | 442  |
| 134    | Jefferson | Brighton       | Jefferson County Sewer         | 55   | \$1,047 | \$41,890 | 48.6% | 26   | \$1,047 | \$41,890  | 48.6%  | 26   | \$1,047 | \$41,890 | 48.6% | 26   |
| 136.01 | Jefferson | Brighton       | Jefferson County Sewer         | 1025 | \$1,047 | \$41,890 | 64.1% | 657  | \$1,047 | \$41,890  | 64.1%  | 657  | \$1,047 | \$41,890 | 64.1% | 657  |
| 136.01 | Jefferson | Midfield       | Jefferson County Sewer         | 330  | \$1,047 | \$41,890 | 64.1% | 211  | \$1,047 | \$41,890  | 64.1%  | 211  | \$1,047 | \$41,890 | 64.1% | 211  |
| 136.01 | Jefferson | Bessemer       | Jefferson County Sewer         | 58   | \$1,047 | \$41,890 | 64.1% | 37   | \$1,047 | \$41,890  | 64.1%  | 37   | \$1,047 | \$41,890 | 64.1% | 37   |
| 138.01 | Jefferson | Bessemer       | Jefferson County Sewer         | 577  | \$1,047 | \$41,890 | 65.0% | 375  | \$1,047 | \$41,890  | 65.0%  | 375  | \$1,047 | \$41,890 | 65.0% | 375  |
| 138.01 | Jefferson | Brighton       | Jefferson County Sewer         | 117  | \$1,047 | \$41,890 | 65.0% | 76   | \$1,047 | \$41,890  | 65.0%  | 76   | \$1,047 | \$41,890 | 65.0% | 76   |
| 138.01 | Jefferson | Midfield       | Jefferson County Sewer         | 55   | \$1,047 | \$41,890 | 65.0% | 36   | \$1,047 | \$41,890  | 65.0%  | 36   | \$1,047 | \$41,890 | 65.0% | 36   |
| 138.01 | Jefferson | Hueytown       | Jefferson County Sewer         | 43   | \$1,047 | \$41,890 | 65.0% | 28   | \$1,047 | \$41,890  | 65.0%  | 28   | \$1,047 | \$41,890 | 65.0% | 28   |
| 139.01 | Jefferson | Birmingham     | Jefferson County Sewer         | 313  | \$1,047 | \$41,890 | 50.0% | 157  | \$1,047 | \$41,890  | 50.0%  | 157  | \$1,047 | \$41,890 | 50.0% | 157  |
| 139.01 | Jefferson | Hueytown       | Jefferson County Sewer         | 208  | \$1,047 | \$41,890 | 50.0% | 104  | \$1,047 | \$41,890  | 50.0%  | 104  | \$1,047 | \$41,890 | 50.0% | 104  |
| 139.01 | Jefferson | Fairfield      | Jefferson County Sewer         | 71   | \$1,047 | \$41,890 | 50.0% | 36   | \$1,047 | \$41,890  | 50.0%  | 36   | \$1,047 | \$41,890 | 50.0% | 36   |
| 139.02 | Jefferson | Hueytown       | Jefferson County Sewer         | 799  | \$1,047 | \$41,890 | 39.3% | 314  | \$1,047 | \$41,890  | 39.3%  | 314  | \$1,047 | \$41,890 | 39.3% | 314  |
| 140.01 | Jefferson | Unincorporated | OWTS                           | 740  | \$530   | \$21,192 | 12.2% | 91   | \$5,000 | \$200,000 | 100.0% | 740  | \$100   | \$4,000  | 2.1%  | 16   |
| 140.01 | Jefferson | Pleasant Grove | OWTS                           | 1    | \$530   | \$21,194 | 12.2% | 0    | \$5,000 | \$200,000 | 100.0% | 1    | \$100   | \$4,000  | 2.1%  | 0    |
| 140.01 | Jefferson | Hueytown       | Jefferson County Sewer         | 695  | \$1,047 | \$41,890 | 29.5% | 205  | \$1,047 | \$41,890  | 29.5%  | 205  | \$1,047 | \$41,890 | 29.5% | 205  |
| 140.02 | Jefferson | Hueytown       | Jefferson County Sewer         | 982  | \$1,047 | \$41,890 | 20.6% | 202  | \$1,047 | \$41,890  | 20.6%  | 202  | \$1,047 | \$41,890 | 20.6% | 202  |
| 140.02 | Jefferson | Bessemer       | Jefferson County Sewer         | 213  | \$1,047 | \$41,890 | 20.6% | 44   | \$1,047 | \$41,890  | 20.6%  | 44   | \$1,047 | \$41,890 | 20.6% | 44   |
| 141.02 | Jefferson | Bessemer       | Jefferson County Sewer         | 1305 | \$1,047 | \$41,890 | 37.1% | 484  | \$1,047 | \$41,890  | 37.1%  | 484  | \$1,047 | \$41,890 | 37.1% | 484  |
| 141.02 | Jefferson | Hueytown       | Jefferson County Sewer         | 385  | \$1,047 | \$41,890 | 37.1% | 143  | \$1,047 | \$41,890  | 37.1%  | 143  | \$1,047 | \$41,890 | 37.1% | 143  |
| 141.04 | Jefferson | Bessemer       | Jefferson County Sewer         | 1318 | \$1,047 | \$41,890 | 43.7% | 577  | \$1,047 | \$41,890  | 43.7%  | 577  | \$1,047 | \$41,890 | 43.7% | 577  |
| 141.05 | Jefferson | Bessemer       | Jefferson County Sewer         | 1837 | \$1,047 | \$41,890 | 37.7% | 693  | \$1,047 | \$41,890  | 37.7%  | 693  | \$1,047 | \$41,890 | 37.7% | 693  |
| 142.03 | Jefferson | Bessemer       | Jefferson County Sewer         | 5026 | \$1,047 | \$41,890 | 23.5% | 1180 | \$1,047 | \$41,890  | 23.5%  | 1180 | \$1,047 | \$41,890 | 23.5% | 1180 |
| 142.03 | Jefferson | Hoover         | City of Hoover                 | 13   | \$441   | \$17,626 | 6.1%  | 1    | \$441   | \$17,626  | 6.1%   | 1    | \$441   | \$17,626 | 6.1%  | 1    |
| 142.03 | Jefferson | Helena         | City of Helena Utilities Board | 411  | \$390   | \$15,600 | 5.3%  | 22   | \$390   | \$15,600  | 5.3%   | 22   | \$390   | \$15,600 | 5.3%  | 22   |
| 142.04 | Jefferson | Bessemer       | Jefferson County Sewer         | 3366 | \$1,047 | \$41,890 | 18.4% | 619  | \$1,047 | \$41,890  | 18.4%  | 619  | \$1,047 | \$41,890 | 18.4% | 619  |
| 142.04 | Jefferson | Hoover         | City of Hoover                 | 296  | \$441   | \$17,626 | 3.1%  | 9    | \$441   | \$17,626  | 3.1%   | 9    | \$441   | \$17,626 | 3.1%  | 9    |
| 143.01 | Jefferson | Bessemer       | Jefferson County Sewer         | 1200 | \$1,047 | \$41,890 | 58.1% | 697  | \$1,047 | \$41,890  | 58.1%  | 697  | \$1,047 | \$41,890 | 58.1% | 697  |
| 143.02 | Jefferson | Birmingham     | Jefferson County Sewer         | 2194 | \$1,047 | \$41,890 | 23.7% | 520  | \$1,047 | \$41,890  | 23.7%  | 520  | \$1,047 | \$41,890 | 23.7% | 520  |
| 143.02 | Jefferson | Bessemer       | Jefferson County Sewer         | 1376 | \$1,047 | \$41,890 | 23.7% | 326  | \$1,047 | \$41,890  | 23.7%  | 326  | \$1,047 | \$41,890 | 23.7% | 326  |
| 143.02 | Jefferson | Lipscomb       | Jefferson County Sewer         | 35   | \$1,047 | \$41,890 | 23.7% | 8    | \$1,047 | \$41,890  | 23.7%  | 8    | \$1,047 | \$41,890 | 23.7% | 8    |
| 143.02 | Jefferson | Hoover         | City of Hoover                 | 243  | \$441   | \$17,626 | 11.7% | 28   | \$441   | \$17,626  | 11.7%  | 28   | \$441   | \$17,626 | 11.7% | 28   |
| 144.04 | Jefferson | Homewood       | Jefferson County Sewer         | 1401 | \$1,047 | \$41,890 | 16.9% | 237  | \$1,047 | \$41,890  | 16.9%  | 237  | \$1,047 | \$41,890 | 16.9% | 237  |
| 144.04 | Jefferson | Vestavia Hills | Jefferson County Sewer         | 942  | \$1,047 | \$41,890 | 16.9% | 159  | \$1,047 | \$41,890  | 16.9%  | 159  | \$1,047 | \$41,890 | 16.9% | 159  |
| 144.04 | Jefferson | Birmingham     | Jefferson County Sewer         | 26   | \$1,047 | \$41,890 | 16.9% | 4    | \$1,047 | \$41,890  | 16.9%  | 4    | \$1,047 | \$41,890 | 16.9% | 4    |
| 144.04 | Jefferson | Hoover         | City of Hoover                 | 72   | \$441   | \$17,626 | 7.9%  | 6    | \$441   | \$17,626  | 7.9%   | 6    | \$441   | \$17,626 | 7.9%  | 6    |
| 144.05 | Jefferson | Vestavia Hills | Jefferson County Sewer         | 1506 | \$1,047 | \$41,890 | 32.7% | 493  | \$1,047 | \$41,890  | 32.7%  | 493  | \$1,047 | \$41,890 | 32.7% | 493  |
| 144.05 | Jefferson | Hoover         | City of Hoover                 | 147  | \$441   | \$17,626 | 12.3% | 18   | \$441   | \$17,626  | 12.3%  | 18   | \$441   | \$17,626 | 12.3% | 18   |
| 144.06 | Jefferson | Vestavia Hills | Jefferson County Sewer         | 1720 | \$1,047 | \$41,890 | 18.1% | 311  | \$1,047 | \$41,890  | 18.1%  | 311  | \$1,047 | \$41,890 | 18.1% | 311  |
| 144.06 | Jefferson | Hoover         | City of Hoover                 | 260  | \$441   | \$17,626 | 4.9%  | 13   | \$441   | \$17,626  | 4.9%   | 13   | \$441   | \$17,626 | 4.9%  | 13   |
| 144.08 | Jefferson | Unincorporated | OWTS                           | 1445 | \$530   | \$21,192 | 16.3% | 235  | \$5,000 | \$200,000 | 100.0% | 1445 | \$100   | \$4,000  | 1.6%  | 23   |

|        |            |                |                              |      |         |          |       |     |         |           |        |      |         |          |       |     |
|--------|------------|----------------|------------------------------|------|---------|----------|-------|-----|---------|-----------|--------|------|---------|----------|-------|-----|
| 144.08 | Jefferson  | Hoover         | City of Hoover               | 147  | \$441   | \$17,626 | 10.6% | 16  | \$441   | \$17,626  | 10.6%  | 16   | \$441   | \$17,626 | 10.6% | 16  |
| 144.09 | Jefferson  | Vestavia Hills | Jefferson County Sewer       | 964  | \$1,047 | \$41,890 | 16.6% | 160 | \$1,047 | \$41,890  | 16.6%  | 160  | \$1,047 | \$41,890 | 16.6% | 160 |
| 144.09 | Jefferson  | Hoover         | City of Hoover               | 187  | \$441   | \$17,626 | 5.8%  | 11  | \$441   | \$17,626  | 5.8%   | 11   | \$441   | \$17,626 | 5.8%  | 11  |
| 144.1  | Jefferson  | Unincorporated | OWTS                         | 1382 | \$530   | \$21,192 | 8.5%  | 117 | \$5,000 | \$200,000 | 100.0% | 1382 | \$100   | \$4,000  | 2.1%  | 29  |
| 144.1  | Jefferson  | Hoover         | City of Hoover               | 631  | \$441   | \$17,626 | 7.0%  | 44  | \$441   | \$17,626  | 7.0%   | 44   | \$441   | \$17,626 | 7.0%  | 44  |
| 144.12 | Jefferson  | Unincorporated | OWTS                         | 1247 | \$530   | \$21,192 | 4.7%  | 59  | \$5,000 | \$200,000 | 99.9%  | 1247 | \$100   | \$4,000  | 0.9%  | 11  |
| 144.12 | Jefferson  | Hoover         | City of Hoover               | 238  | \$441   | \$17,626 | 4.0%  | 9   | \$441   | \$17,626  | 4.0%   | 9    | \$441   | \$17,626 | 4.0%  | 9   |
| 144.13 | Jefferson  | Birmingham     | Jefferson County Sewer       | 1103 | \$1,047 | \$41,890 | 12.1% | 134 | \$1,047 | \$41,890  | 12.1%  | 134  | \$1,047 | \$41,890 | 12.1% | 134 |
| 144.13 | Jefferson  | Bessemer       | Jefferson County Sewer       | 877  | \$1,047 | \$41,890 | 12.1% | 106 | \$1,047 | \$41,890  | 12.1%  | 106  | \$1,047 | \$41,890 | 12.1% | 106 |
| 144.13 | Jefferson  | Homewood       | Jefferson County Sewer       | 838  | \$1,047 | \$41,890 | 12.1% | 102 | \$1,047 | \$41,890  | 12.1%  | 102  | \$1,047 | \$41,890 | 12.1% | 102 |
| 144.13 | Jefferson  | Hoover         | City of Hoover               | 730  | \$441   | \$17,626 | 4.8%  | 35  | \$441   | \$17,626  | 4.8%   | 35   | \$441   | \$17,626 | 4.8%  | 35  |
| 300    | Lamar      | Unincorporated | OWTS                         | 1386 | \$530   | \$21,192 | 31.6% | 439 | \$5,000 | \$200,000 | 99.9%  | 1386 | \$100   | \$4,000  | 3.2%  | 44  |
| 300    | Lamar      | Beaverton      | OWTS                         | 40   | \$530   | \$21,194 | 31.6% | 13  | \$5,000 | \$200,000 | 99.9%  | 40   | \$100   | \$4,000  | 3.2%  | 1   |
| 300    | Lamar      | Detroit        | OWTS                         | 12   | \$530   | \$21,194 | 31.6% | 4   | \$5,000 | \$200,000 | 99.9%  | 12   | \$100   | \$4,000  | 3.2%  | 0   |
| 300    | Lamar      | Sulligent      | City of Sulligent            | 471  | \$280   | \$11,184 | 11.6% | 54  | \$280   | \$11,184  | 11.6%  | 54   | \$280   | \$11,184 | 11.6% | 54  |
| 301    | Lamar      | Unincorporated | OWTS                         | 1507 | \$530   | \$21,192 | 27.1% | 408 | \$5,000 | \$200,000 | 100.0% | 1507 | \$100   | \$4,000  | 3.6%  | 54  |
| 301    | Lamar      | Vernon         | Vernon Water and Sewer Board | 706  | \$256   | \$10,243 | 9.5%  | 67  | \$256   | \$10,243  | 9.5%   | 67   | \$256   | \$10,243 | 9.5%  | 67  |
| 302    | Lamar      | Unincorporated | OWTS                         | 1164 | \$530   | \$21,192 | 24.0% | 280 | \$5,000 | \$200,000 | 100.0% | 1164 | \$100   | \$4,000  | 2.4%  | 27  |
| 302    | Lamar      | Millport       | Town of Millport             | 403  | \$477   | \$19,080 | 19.9% | 80  | \$477   | \$19,080  | 19.9%  | 80   | \$477   | \$19,080 | 19.9% | 80  |
| 302    | Lamar      | Kennedy        | Kennedy                      | 167  | \$330   | \$13,186 | 9.7%  | 16  | \$330   | \$13,186  | 9.7%   | 16   | \$330   | \$13,186 | 9.7%  | 16  |
| 101    | Lauderdale | Unincorporated | OWTS                         | 289  | \$530   | \$21,192 | 46.1% | 133 | \$5,000 | \$200,000 | 99.9%  | 289  | \$100   | \$4,000  | 9.8%  | 28  |
| 101    | Lauderdale | Florence       | Florence Utilities           | 158  | \$578   | \$23,136 | 49.5% | 78  | \$578   | \$23,136  | 49.5%  | 78   | \$578   | \$23,136 | 49.5% | 78  |
| 102    | Lauderdale | Unincorporated | OWTS                         | 216  | \$530   | \$21,192 | 47.2% | 102 | \$5,000 | \$200,000 | 100.0% | 216  | \$100   | \$4,000  | 10.0% | 22  |
| 102    | Lauderdale | Florence       | Florence Utilities           | 786  | \$578   | \$23,136 | 51.2% | 403 | \$578   | \$23,136  | 51.2%  | 403  | \$578   | \$23,136 | 51.2% | 403 |
| 103    | Lauderdale | Unincorporated | OWTS                         | 134  | \$530   | \$21,192 | 59.8% | 80  | \$5,000 | \$200,000 | 99.9%  | 134  | \$100   | \$4,000  | 13.2% | 18  |
| 103    | Lauderdale | Florence       | Florence Utilities           | 432  | \$578   | \$23,136 | 63.3% | 274 | \$578   | \$23,136  | 63.3%  | 274  | \$578   | \$23,136 | 63.3% | 274 |
| 104    | Lauderdale | Unincorporated | OWTS                         | 38   | \$530   | \$21,192 | 35.1% | 13  | \$5,000 | \$200,000 | 99.9%  | 38   | \$100   | \$4,000  | 5.1%  | 2   |
| 104    | Lauderdale | Florence       | Florence Utilities           | 1324 | \$578   | \$23,136 | 39.0% | 516 | \$578   | \$23,136  | 39.0%  | 516  | \$578   | \$23,136 | 39.0% | 516 |
| 106    | Lauderdale | Florence       | Florence Utilities           | 1414 | \$578   | \$23,136 | 39.1% | 553 | \$578   | \$23,136  | 39.1%  | 553  | \$578   | \$23,136 | 39.1% | 553 |
| 107    | Lauderdale | Unincorporated | OWTS                         | 19   | \$530   | \$21,192 | 38.3% | 7   | \$5,000 | \$200,000 | 99.9%  | 19   | \$100   | \$4,000  | 6.3%  | 1   |
| 107    | Lauderdale | Florence       | Florence Utilities           | 633  | \$578   | \$23,136 | 43.9% | 278 | \$578   | \$23,136  | 43.9%  | 278  | \$578   | \$23,136 | 43.9% | 278 |
| 108    | Lauderdale | Unincorporated | OWTS                         | 543  | \$530   | \$21,192 | 31.3% | 170 | \$5,000 | \$200,000 | 100.0% | 543  | \$100   | \$4,000  | 4.1%  | 22  |
| 108    | Lauderdale | Florence       | Florence Utilities           | 932  | \$578   | \$23,136 | 36.1% | 336 | \$578   | \$23,136  | 36.1%  | 336  | \$578   | \$23,136 | 36.1% | 336 |
| 109    | Lauderdale | Unincorporated | OWTS                         | 23   | \$530   | \$21,192 | 23.5% | 5   | \$5,000 | \$200,000 | 99.9%  | 23   | \$100   | \$4,000  | 4.4%  | 1   |
| 109    | Lauderdale | St. Florian    | OWTS                         | 154  | \$530   | \$21,194 | 23.5% | 36  | \$5,000 | \$200,000 | 99.9%  | 154  | \$100   | \$4,000  | 4.4%  | 7   |
| 109    | Lauderdale | Florence       | Florence Utilities           | 3217 | \$578   | \$23,136 | 25.7% | 828 | \$578   | \$23,136  | 25.7%  | 828  | \$578   | \$23,136 | 25.7% | 828 |
| 110    | Lauderdale | Unincorporated | OWTS                         | 32   | \$530   | \$21,192 | 27.0% | 9   | \$5,000 | \$200,000 | 100.0% | 32   | \$100   | \$4,000  | 1.6%  | 1   |
| 110    | Lauderdale | Florence       | Florence Utilities           | 2037 | \$578   | \$23,136 | 31.6% | 644 | \$578   | \$23,136  | 31.6%  | 644  | \$578   | \$23,136 | 31.6% | 644 |
| 111.01 | Lauderdale | Unincorporated | OWTS                         | 1502 | \$530   | \$21,192 | 13.8% | 207 | \$5,000 | \$200,000 | 100.0% | 1502 | \$100   | \$4,000  | 1.6%  | 24  |
| 111.01 | Lauderdale | Florence       | Florence Utilities           | 876  | \$578   | \$23,136 | 15.2% | 133 | \$578   | \$23,136  | 15.2%  | 133  | \$578   | \$23,136 | 15.2% | 133 |
| 111.02 | Lauderdale | Unincorporated | OWTS                         | 864  | \$530   | \$21,192 | 15.2% | 131 | \$5,000 | \$200,000 | 99.9%  | 864  | \$100   | \$4,000  | 1.3%  | 11  |

|        |            |                 |                                                     |      |       |          |       |     |         |           |        |      |       |          |       |     |
|--------|------------|-----------------|-----------------------------------------------------|------|-------|----------|-------|-----|---------|-----------|--------|------|-------|----------|-------|-----|
| 111.02 | Lauderdale | Florence        | Florence Utilities                                  | 1241 | \$578 | \$23,136 | 17.1% | 212 | \$578   | \$23,136  | 17.1%  | 212  | \$578 | \$23,136 | 17.1% | 212 |
| 112    | Lauderdale | Unincorporated  | OWTS                                                | 1306 | \$530 | \$21,192 | 19.7% | 258 | \$5,000 | \$200,000 | 99.8%  | 1306 | \$100 | \$4,000  | 2.0%  | 27  |
| 112    | Lauderdale | Florence        | Florence Utilities                                  | 357  | \$578 | \$23,136 | 22.0% | 78  | \$578   | \$23,136  | 22.0%  | 78   | \$578 | \$23,136 | 22.0% | 78  |
| 113    | Lauderdale | Unincorporated  | OWTS                                                | 791  | \$530 | \$21,192 | 23.6% | 187 | \$5,000 | \$200,000 | 99.9%  | 791  | \$100 | \$4,000  | 3.6%  | 28  |
| 113    | Lauderdale | Waterloo        | OWTS                                                | 5    | \$530 | \$21,194 | 23.6% | 1   | \$5,000 | \$200,000 | 99.9%  | 5    | \$100 | \$4,000  | 3.6%  | 0   |
| 114    | Lauderdale | Unincorporated  | OWTS                                                | 2491 | \$530 | \$21,192 | 17.4% | 434 | \$5,000 | \$200,000 | 100.0% | 2491 | \$100 | \$4,000  | 2.8%  | 70  |
| 115.01 | Lauderdale | Unincorporated  | OWTS                                                | 847  | \$530 | \$21,192 | 13.3% | 113 | \$5,000 | \$200,000 | 99.9%  | 847  | \$100 | \$4,000  | 1.4%  | 12  |
| 115.01 | Lauderdale | St. Florian     | OWTS                                                | 387  | \$530 | \$21,194 | 13.3% | 52  | \$5,000 | \$200,000 | 99.9%  | 387  | \$100 | \$4,000  | 1.4%  | 5   |
| 115.01 | Lauderdale | Florence        | Florence Utilities                                  | 2053 | \$578 | \$23,136 | 15.2% | 312 | \$578   | \$23,136  | 15.2%  | 312  | \$578 | \$23,136 | 15.2% | 312 |
| 115.02 | Lauderdale | Unincorporated  | OWTS                                                | 1953 | \$530 | \$21,192 | 7.3%  | 142 | \$5,000 | \$200,000 | 100.0% | 1953 | \$100 | \$4,000  | 1.1%  | 21  |
| 115.02 | Lauderdale | St. Florian     | OWTS                                                | 57   | \$530 | \$21,194 | 7.3%  | 4   | \$5,000 | \$200,000 | 100.0% | 57   | \$100 | \$4,000  | 1.1%  | 1   |
| 115.02 | Lauderdale | Florence        | Florence Utilities                                  | 28   | \$578 | \$23,136 | 7.8%  | 2   | \$578   | \$23,136  | 7.8%   | 2    | \$578 | \$23,136 | 7.8%  | 2   |
| 116.02 | Lauderdale | Unincorporated  | OWTS                                                | 1697 | \$530 | \$21,192 | 12.8% | 217 | \$5,000 | \$200,000 | 100.0% | 1697 | \$100 | \$4,000  | 2.6%  | 44  |
| 116.03 | Lauderdale | Unincorporated  | OWTS                                                | 1849 | \$530 | \$21,192 | 10.7% | 198 | \$5,000 | \$200,000 | 99.9%  | 1849 | \$100 | \$4,000  | 1.1%  | 20  |
| 116.03 | Lauderdale | Killen          | OWTS                                                | 57   | \$530 | \$21,194 | 10.7% | 6   | \$5,000 | \$200,000 | 99.9%  | 57   | \$100 | \$4,000  | 1.1%  | 1   |
| 116.04 | Lauderdale | Unincorporated  | OWTS                                                | 2409 | \$530 | \$21,192 | 7.7%  | 187 | \$5,000 | \$200,000 | 100.0% | 2409 | \$100 | \$4,000  | 1.0%  | 23  |
| 116.04 | Lauderdale | Killen          | OWTS                                                | 85   | \$530 | \$21,194 | 7.7%  | 7   | \$5,000 | \$200,000 | 100.0% | 85   | \$100 | \$4,000  | 1.0%  | 1   |
| 117    | Lauderdale | Unincorporated  | OWTS                                                | 1415 | \$530 | \$21,192 | 14.8% | 210 | \$5,000 | \$200,000 | 100.0% | 1415 | \$100 | \$4,000  | 1.5%  | 22  |
| 117    | Lauderdale | Lexington       | Town of Lexington                                   | 353  | \$717 | \$28,680 | 22.3% | 79  | \$717   | \$28,680  | 22.3%  | 79   | \$717 | \$28,680 | 22.3% | 79  |
| 118.01 | Lauderdale | Unincorporated  | OWTS                                                | 1699 | \$530 | \$21,192 | 18.6% | 316 | \$5,000 | \$200,000 | 100.0% | 1699 | \$100 | \$4,000  | 1.5%  | 25  |
| 118.01 | Lauderdale | Anderson        | OWTS                                                | 28   | \$530 | \$21,194 | 18.6% | 5   | \$5,000 | \$200,000 | 100.0% | 28   | \$100 | \$4,000  | 1.5%  | 0   |
| 118.01 | Lauderdale | Rogersville     | Rogersville Water Works and Sewer Board             | 103  | \$259 | \$10,368 | 4.3%  | 4   | \$259   | \$10,368  | 4.3%   | 4    | \$259 | \$10,368 | 4.3%  | 4   |
| 118.02 | Lauderdale | Unincorporated  | OWTS                                                | 1269 | \$530 | \$21,192 | 24.1% | 306 | \$5,000 | \$200,000 | 99.9%  | 1269 | \$100 | \$4,000  | 3.3%  | 42  |
| 118.02 | Lauderdale | Rogersville     | Rogersville Water Works and Sewer Board             | 368  | \$259 | \$10,368 | 8.8%  | 32  | \$259   | \$10,368  | 8.8%   | 32   | \$259 | \$10,368 | 8.8%  | 32  |
| 9791   | Lawrence   | Unincorporated  | OWTS                                                | 667  | \$530 | \$21,192 | 22.6% | 151 | \$5,000 | \$200,000 | 100.0% | 667  | \$100 | \$4,000  | 1.4%  | 9   |
| 9791   | Lawrence   | Hillsboro       | OWTS                                                | 17   | \$530 | \$21,194 | 22.6% | 4   | \$5,000 | \$200,000 | 100.0% | 17   | \$100 | \$4,000  | 1.4%  | 0   |
| 9792   | Lawrence   | Unincorporated  | OWTS                                                | 573  | \$530 | \$21,192 | 30.8% | 177 | \$5,000 | \$200,000 | 99.9%  | 573  | \$100 | \$4,000  | 7.0%  | 40  |
| 9792   | Lawrence   | Courtland       | West Morgan/East Lawrence Water and Sewer Authority | 545  | \$462 | \$18,470 | 27.9% | 152 | \$462   | \$18,470  | 27.9%  | 152  | \$462 | \$18,470 | 27.9% | 152 |
| 9792   | Lawrence   | North Courtland | West Morgan/East Lawrence Water and Sewer Authority | 121  | \$462 | \$18,470 | 27.9% | 34  | \$462   | \$18,470  | 27.9%  | 34   | \$462 | \$18,470 | 27.9% | 34  |
| 9792   | Lawrence   | Town Creek      | Town of Town Creek                                  | 539  | \$396 | \$15,840 | 25.1% | 135 | \$396   | \$15,840  | 25.1%  | 135  | \$396 | \$15,840 | 25.1% | 135 |
| 9793   | Lawrence   | Unincorporated  | OWTS                                                | 1725 | \$530 | \$21,192 | 19.7% | 341 | \$5,000 | \$200,000 | 100.0% | 1725 | \$100 | \$4,000  | 3.7%  | 63  |
| 9794   | Lawrence   | Unincorporated  | OWTS                                                | 754  | \$530 | \$21,192 | 35.3% | 267 | \$5,000 | \$200,000 | 99.9%  | 754  | \$100 | \$4,000  | 5.6%  | 43  |
| 9794   | Lawrence   | Moulton         | City of Moulton                                     | 1049 | \$365 | \$14,611 | 23.4% | 246 | \$365   | \$14,611  | 23.4%  | 246  | \$365 | \$14,611 | 23.4% | 246 |
| 9795   | Lawrence   | Unincorporated  | OWTS                                                | 2089 | \$530 | \$21,192 | 21.2% | 443 | \$5,000 | \$200,000 | 100.0% | 2089 | \$100 | \$4,000  | 3.1%  | 65  |
| 9796   | Lawrence   | Unincorporated  | OWTS                                                | 1837 | \$530 | \$21,192 | 20.3% | 373 | \$5,000 | \$200,000 | 100.0% | 1837 | \$100 | \$4,000  | 2.6%  | 48  |
| 9797   | Lawrence   | Unincorporated  | OWTS                                                | 819  | \$530 | \$21,192 | 21.6% | 177 | \$5,000 | \$200,000 | 100.0% | 819  | \$100 | \$4,000  | 1.9%  | 16  |

|        |          |                |                                            |      |       |          |       |     |         |           |        |      |       |          |       |     |
|--------|----------|----------------|--------------------------------------------|------|-------|----------|-------|-----|---------|-----------|--------|------|-------|----------|-------|-----|
| 9798   | Lawrence | Unincorporated | OWTS                                       | 991  | \$530 | \$21,192 | 16.3% | 162 | \$5,000 | \$200,000 | 100.0% | 991  | \$100 | \$4,000  | 2.0%  | 20  |
| 9798   | Lawrence | Moulton        | City of Moulton                            | 289  | \$365 | \$14,611 | 10.1% | 29  | \$365   | \$14,611  | 10.1%  | 29   | \$365 | \$14,611 | 10.1% | 29  |
| 9799   | Lawrence | Unincorporated | OWTS                                       | 662  | \$530 | \$21,192 | 13.6% | 90  | \$5,000 | \$200,000 | 100.0% | 662  | \$100 | \$4,000  | 1.0%  | 6   |
| 402    | Lee      | Auburn         | City of Auburn                             | 2398 | \$356 | \$14,222 | 24.2% | 580 | \$356   | \$14,222  | 24.2%  | 580  | \$356 | \$14,222 | 24.2% | 580 |
| 402    | Lee      | Opelika        | Opelika Public Works                       | 11   | \$310 | \$12,389 | 22.7% | 3   | \$310   | \$12,389  | 22.7%  | 3    | \$310 | \$12,389 | 22.7% | 3   |
| 403    | Lee      | Auburn         | City of Auburn                             | 1207 | \$356 | \$14,222 | 33.3% | 402 | \$356   | \$14,222  | 33.3%  | 402  | \$356 | \$14,222 | 33.3% | 402 |
| 404    | Lee      | Auburn         | City of Auburn                             | 2634 | \$356 | \$14,222 | 20.6% | 544 | \$356   | \$14,222  | 20.6%  | 544  | \$356 | \$14,222 | 20.6% | 544 |
| 405    | Lee      | Auburn         | City of Auburn                             | 3842 | \$356 | \$14,222 | 12.8% | 493 | \$356   | \$14,222  | 12.8%  | 493  | \$356 | \$14,222 | 12.8% | 493 |
| 405    | Lee      | Opelika        | Opelika Public Works                       | 144  | \$310 | \$12,389 | 11.5% | 17  | \$310   | \$12,389  | 11.5%  | 17   | \$310 | \$12,389 | 11.5% | 17  |
| 406.02 | Lee      | Auburn         | City of Auburn                             | 2444 | \$356 | \$14,222 | 18.7% | 458 | \$356   | \$14,222  | 18.7%  | 458  | \$356 | \$14,222 | 18.7% | 458 |
| 406.03 | Lee      | Auburn         | City of Auburn                             | 374  | \$356 | \$14,222 | 38.1% | 143 | \$356   | \$14,222  | 38.1%  | 143  | \$356 | \$14,222 | 38.1% | 143 |
| 406.04 | Lee      | Auburn         | City of Auburn                             | 2250 | \$356 | \$14,222 | 40.4% | 910 | \$356   | \$14,222  | 40.4%  | 910  | \$356 | \$14,222 | 40.4% | 910 |
| 407    | Lee      | Auburn         | City of Auburn                             | 217  | \$356 | \$14,222 | 50.6% | 110 | \$356   | \$14,222  | 50.6%  | 110  | \$356 | \$14,222 | 50.6% | 110 |
| 408    | Lee      | Auburn         | City of Auburn                             | 1489 | \$356 | \$14,222 | 60.9% | 907 | \$356   | \$14,222  | 60.9%  | 907  | \$356 | \$14,222 | 60.9% | 907 |
| 409.01 | Lee      | Auburn         | City of Auburn                             | 1424 | \$356 | \$14,222 | 13.0% | 185 | \$356   | \$14,222  | 13.0%  | 185  | \$356 | \$14,222 | 13.0% | 185 |
| 409.01 | Lee      | Opelika        | Opelika Public Works                       | 31   | \$310 | \$12,389 | 10.7% | 3   | \$310   | \$12,389  | 10.7%  | 3    | \$310 | \$12,389 | 10.7% | 3   |
| 409.02 | Lee      | Auburn         | City of Auburn                             | 2451 | \$356 | \$14,222 | 34.2% | 839 | \$356   | \$14,222  | 34.2%  | 839  | \$356 | \$14,222 | 34.2% | 839 |
| 410    | Lee      | Notasulga      | Town of Notasulga                          | 25   | \$372 | \$14,880 | 8.1%  | 2   | \$372   | \$14,880  | 8.1%   | 2    | \$372 | \$14,880 | 8.1%  | 2   |
| 410    | Lee      | Auburn         | City of Auburn                             | 3137 | \$356 | \$14,222 | 7.9%  | 248 | \$356   | \$14,222  | 7.9%   | 248  | \$356 | \$14,222 | 7.9%  | 248 |
| 410    | Lee      | Opelika        | Opelika Public Works                       | 264  | \$310 | \$12,389 | 7.4%  | 20  | \$310   | \$12,389  | 7.4%   | 20   | \$310 | \$12,389 | 7.4%  | 20  |
| 411    | Lee      | Auburn         | City of Auburn                             | 1291 | \$356 | \$14,222 | 16.4% | 211 | \$356   | \$14,222  | 16.4%  | 211  | \$356 | \$14,222 | 16.4% | 211 |
| 411    | Lee      | Opelika        | Opelika Public Works                       | 3222 | \$310 | \$12,389 | 13.6% | 439 | \$310   | \$12,389  | 13.6%  | 439  | \$310 | \$12,389 | 13.6% | 439 |
| 412    | Lee      | Unincorporated | OWTS                                       | 250  | \$530 | \$21,192 | 14.0% | 35  | \$5,000 | \$200,000 | 100.0% | 250  | \$100 | \$4,000  | 2.4%  | 6   |
| 412    | Lee      | Opelika        | Opelika Public Works                       | 1617 | \$310 | \$12,389 | 7.7%  | 124 | \$310   | \$12,389  | 7.7%   | 124  | \$310 | \$12,389 | 7.7%  | 124 |
| 413    | Lee      | Opelika        | Opelika Public Works                       | 1252 | \$310 | \$12,389 | 13.4% | 168 | \$310   | \$12,389  | 13.4%  | 168  | \$310 | \$12,389 | 13.4% | 168 |
| 414    | Lee      | Opelika        | Opelika Public Works                       | 1508 | \$310 | \$12,389 | 15.1% | 227 | \$310   | \$12,389  | 15.1%  | 227  | \$310 | \$12,389 | 15.1% | 227 |
| 416    | Lee      | Opelika        | Opelika Public Works                       | 1592 | \$310 | \$12,389 | 22.3% | 355 | \$310   | \$12,389  | 22.3%  | 355  | \$310 | \$12,389 | 22.3% | 355 |
| 417    | Lee      | Auburn         | City of Auburn                             | 753  | \$356 | \$14,222 | 4.4%  | 33  | \$356   | \$14,222  | 4.4%   | 33   | \$356 | \$14,222 | 4.4%  | 33  |
| 417    | Lee      | Opelika        | Opelika Public Works                       | 3085 | \$310 | \$12,389 | 4.0%  | 124 | \$310   | \$12,389  | 4.0%   | 124  | \$310 | \$12,389 | 4.0%  | 124 |
| 418    | Lee      | Unincorporated | OWTS                                       | 2536 | \$530 | \$21,192 | 24.4% | 619 | \$5,000 | \$200,000 | 100.0% | 2536 | \$100 | \$4,000  | 4.6%  | 117 |
| 418    | Lee      | Opelika        | Opelika Public Works                       | 214  | \$310 | \$12,389 | 13.5% | 29  | \$310   | \$12,389  | 13.5%  | 29   | \$310 | \$12,389 | 13.5% | 29  |
| 419    | Lee      | Unincorporated | OWTS                                       | 3069 | \$530 | \$21,192 | 18.2% | 559 | \$5,000 | \$200,000 | 100.0% | 3069 | \$100 | \$4,000  | 3.6%  | 112 |
| 419    | Lee      | Smiths Station | Smiths Water and Sewer Authority           | 136  | \$489 | \$19,541 | 16.3% | 22  | \$489   | \$19,541  | 16.3%  | 22   | \$489 | \$19,541 | 16.3% | 22  |
| 420.02 | Lee      | Unincorporated | OWTS                                       | 939  | \$530 | \$21,192 | 11.8% | 111 | \$5,000 | \$200,000 | 99.9%  | 939  | \$100 | \$4,000  | 1.0%  | 9   |
| 420.02 | Lee      | Smiths Station | Smiths Water and Sewer Authority           | 550  | \$489 | \$19,541 | 10.4% | 57  | \$489   | \$19,541  | 10.4%  | 57   | \$489 | \$19,541 | 10.4% | 57  |
| 420.02 | Lee      | Phenix City    | Phenix City Department of Public Utilities | 1553 | \$306 | \$12,240 | 4.4%  | 68  | \$306   | \$12,240  | 4.4%   | 68   | \$306 | \$12,240 | 4.4%  | 68  |
| 420.03 | Lee      | Unincorporated | OWTS                                       | 1263 | \$530 | \$21,192 | 14.2% | 179 | \$5,000 | \$200,000 | 100.0% | 1263 | \$100 | \$4,000  | 0.5%  | 6   |
| 420.04 | Lee      | Unincorporated | OWTS                                       | 3331 | \$530 | \$21,192 | 16.7% | 558 | \$5,000 | \$200,000 | 100.0% | 3331 | \$100 | \$4,000  | 3.6%  | 120 |

|        |           |                |                                                    |      |       |          |       |     |         |           |        |      |       |          |       |     |
|--------|-----------|----------------|----------------------------------------------------|------|-------|----------|-------|-----|---------|-----------|--------|------|-------|----------|-------|-----|
| 420.04 | Lee       | Smiths Station | Smiths Water and Sewer Authority                   | 405  | \$489 | \$19,541 | 15.5% | 63  | \$489   | \$19,541  | 15.5%  | 63   | \$489 | \$19,541 | 15.5% | 63  |
| 420.04 | Lee       | Phenix City    | Phenix City Department of Public Utilities         | 361  | \$306 | \$12,240 | 10.4% | 37  | \$306   | \$12,240  | 10.4%  | 37   | \$306 | \$12,240 | 10.4% | 37  |
| 420.05 | Lee       | Unincorporated | OWTS                                               | 1534 | \$530 | \$21,192 | 13.6% | 209 | \$5,000 | \$200,000 | 100.0% | 1534 | \$100 | \$4,000  | 1.7%  | 26  |
| 420.05 | Lee       | Smiths Station | Smiths Water and Sewer Authority                   | 341  | \$489 | \$19,541 | 12.4% | 42  | \$489   | \$19,541  | 12.4%  | 42   | \$489 | \$19,541 | 12.4% | 42  |
| 420.06 | Lee       | Unincorporated | OWTS                                               | 118  | \$530 | \$21,192 | 14.7% | 17  | \$5,000 | \$200,000 | 100.0% | 118  | \$100 | \$4,000  | 2.8%  | 3   |
| 420.06 | Lee       | Smiths Station | Smiths Water and Sewer Authority                   | 679  | \$489 | \$19,541 | 12.9% | 88  | \$489   | \$19,541  | 12.9%  | 88   | \$489 | \$19,541 | 12.9% | 88  |
| 421.01 | Lee       | Auburn         | City of Auburn                                     | 1402 | \$356 | \$14,222 | 13.4% | 188 | \$356   | \$14,222  | 13.4%  | 188  | \$356 | \$14,222 | 13.4% | 188 |
| 421.02 | Lee       | Unincorporated | OWTS                                               | 346  | \$530 | \$21,192 | 15.3% | 53  | \$5,000 | \$200,000 | 100.0% | 346  | \$100 | \$4,000  | 1.8%  | 6   |
| 421.02 | Lee       | Auburn         | City of Auburn                                     | 2546 | \$356 | \$14,222 | 6.5%  | 164 | \$356   | \$14,222  | 6.5%   | 164  | \$356 | \$14,222 | 6.5%  | 164 |
| 201.01 | Limestone | Unincorporated | OWTS                                               | 969  | \$530 | \$21,192 | 11.5% | 111 | \$5,000 | \$200,000 | 100.0% | 969  | \$100 | \$4,000  | 1.6%  | 16  |
| 201.01 | Limestone | Athens         | Athens Utilities                                   | 459  | \$523 | \$20,909 | 11.2% | 51  | \$523   | \$20,909  | 11.2%  | 51   | \$523 | \$20,909 | 11.2% | 51  |
| 201.02 | Limestone | Unincorporated | OWTS                                               | 1249 | \$530 | \$21,192 | 23.7% | 296 | \$5,000 | \$200,000 | 99.9%  | 1249 | \$100 | \$4,000  | 2.1%  | 26  |
| 201.02 | Limestone | Ardmore        | Water Works and Sewer Board of the Town of Ardmore | 1156 | \$419 | \$16,752 | 14.8% | 171 | \$419   | \$16,752  | 14.8%  | 171  | \$419 | \$16,752 | 14.8% | 171 |
| 202.01 | Limestone | Unincorporated | OWTS                                               | 1530 | \$530 | \$21,192 | 19.4% | 296 | \$5,000 | \$200,000 | 100.0% | 1530 | \$100 | \$4,000  | 3.7%  | 56  |
| 202.01 | Limestone | Athens         | Athens Utilities                                   | 232  | \$523 | \$20,909 | 19.0% | 44  | \$523   | \$20,909  | 19.0%  | 44   | \$523 | \$20,909 | 19.0% | 44  |
| 202.02 | Limestone | Unincorporated | OWTS                                               | 1186 | \$530 | \$21,192 | 18.3% | 217 | \$5,000 | \$200,000 | 100.0% | 1186 | \$100 | \$4,000  | 3.3%  | 39  |
| 202.02 | Limestone | Elkmont        | Limestone County Water and Sewer Authority         | 693  | \$575 | \$23,002 | 19.5% | 135 | \$575   | \$23,002  | 19.5%  | 135  | \$575 | \$23,002 | 19.5% | 135 |
| 203    | Limestone | Unincorporated | OWTS                                               | 1226 | \$530 | \$21,192 | 11.1% | 136 | \$5,000 | \$200,000 | 100.0% | 1226 | \$100 | \$4,000  | 1.6%  | 20  |
| 203    | Limestone | Lester         | OWTS                                               | 24   | \$530 | \$21,194 | 11.1% | 3   | \$5,000 | \$200,000 | 100.0% | 24   | \$100 | \$4,000  | 1.6%  | 0   |
| 204.01 | Limestone | Unincorporated | OWTS                                               | 2272 | \$530 | \$21,192 | 21.3% | 483 | \$5,000 | \$200,000 | 99.9%  | 2272 | \$100 | \$4,000  | 2.4%  | 54  |
| 204.02 | Limestone | Unincorporated | OWTS                                               | 1232 | \$530 | \$21,192 | 16.8% | 207 | \$5,000 | \$200,000 | 99.9%  | 1232 | \$100 | \$4,000  | 2.1%  | 26  |
| 204.02 | Limestone | Athens         | Athens Utilities                                   | 609  | \$523 | \$20,909 | 16.6% | 101 | \$523   | \$20,909  | 16.6%  | 101  | \$523 | \$20,909 | 16.6% | 101 |
| 205    | Limestone | Athens         | Athens Utilities                                   | 1108 | \$523 | \$20,909 | 38.5% | 427 | \$523   | \$20,909  | 38.5%  | 427  | \$523 | \$20,909 | 38.5% | 427 |
| 206    | Limestone | Athens         | Athens Utilities                                   | 1627 | \$523 | \$20,909 | 33.0% | 537 | \$523   | \$20,909  | 33.0%  | 537  | \$523 | \$20,909 | 33.0% | 537 |
| 207    | Limestone | Athens         | Athens Utilities                                   | 1075 | \$523 | \$20,909 | 43.7% | 469 | \$523   | \$20,909  | 43.7%  | 469  | \$523 | \$20,909 | 43.7% | 469 |
| 208.01 | Limestone | Unincorporated | OWTS                                               | 1094 | \$530 | \$21,192 | 12.4% | 136 | \$5,000 | \$200,000 | 100.0% | 1094 | \$100 | \$4,000  | 0.8%  | 9   |
| 208.01 | Limestone | Athens         | Athens Utilities                                   | 1115 | \$523 | \$20,909 | 12.2% | 135 | \$523   | \$20,909  | 12.2%  | 135  | \$523 | \$20,909 | 12.2% | 135 |
| 208.02 | Limestone | Athens         | Athens Utilities                                   | 496  | \$523 | \$20,909 | 6.3%  | 31  | \$523   | \$20,909  | 6.3%   | 31   | \$523 | \$20,909 | 6.3%  | 31  |
| 208.02 | Limestone | Huntsville     | City of Huntsville                                 | 3002 | \$348 | \$13,910 | 2.7%  | 82  | \$348   | \$13,910  | 2.7%   | 82   | \$348 | \$13,910 | 2.7%  | 82  |
| 209    | Limestone | Athens         | Athens Utilities                                   | 1803 | \$523 | \$20,909 | 13.0% | 234 | \$523   | \$20,909  | 13.0%  | 234  | \$523 | \$20,909 | 13.0% | 234 |
| 210    | Limestone | Athens         | Athens Utilities                                   | 879  | \$523 | \$20,909 | 20.0% | 176 | \$523   | \$20,909  | 20.0%  | 176  | \$523 | \$20,909 | 20.0% | 176 |
| 211    | Limestone | Athens         | Athens Utilities                                   | 1104 | \$523 | \$20,909 | 15.5% | 171 | \$523   | \$20,909  | 15.5%  | 171  | \$523 | \$20,909 | 15.5% | 171 |
| 211    | Limestone | Huntsville     | City of Huntsville                                 | 1124 | \$348 | \$13,910 | 9.9%  | 112 | \$348   | \$13,910  | 9.9%   | 112  | \$348 | \$13,910 | 9.9%  | 112 |
| 211    | Limestone | Decatur        | Decatur Utilities                                  | 185  | \$331 | \$13,229 | 9.3%  | 17  | \$331   | \$13,229  | 9.3%   | 17   | \$331 | \$13,229 | 9.3%  | 17  |
| 212    | Limestone | Athens         | Athens Utilities                                   | 292  | \$523 | \$20,909 | 9.8%  | 29  | \$523   | \$20,909  | 9.8%   | 29   | \$523 | \$20,909 | 9.8%  | 29  |

|      |           |                |                                                    |      |         |          |       |     |          |           |        |      |       |          |       |     |
|------|-----------|----------------|----------------------------------------------------|------|---------|----------|-------|-----|----------|-----------|--------|------|-------|----------|-------|-----|
| 212  | Limestone | Madison        | Water and Wastewater Board of the City of Madison  | 1151 | \$445   | \$17,798 | 8.9%  | 103 | \$445    | \$17,798  | 8.9%   | 103  | \$445 | \$17,798 | 8.9%  | 103 |
| 212  | Limestone | Huntsville     | City of Huntsville                                 | 2693 | \$348   | \$13,910 | 7.6%  | 205 | \$348    | \$13,910  | 7.6%   | 205  | \$348 | \$13,910 | 7.6%  | 205 |
| 212  | Limestone | Decatur        | Decatur Utilities                                  | 558  | \$331   | \$13,229 | 7.3%  | 41  | \$331    | \$13,229  | 7.3%   | 41   | \$331 | \$13,229 | 7.3%  | 41  |
| 7808 | Lowndes   | Unincorporated | OWTS                                               | 1037 | \$1,819 | \$72,778 | 79.3% | 823 | \$20,000 | \$800,000 | 100.0% | 1037 | \$100 | \$4,000  | 6.8%  | 71  |
| 7808 | Lowndes   | Hayneville     | Town of Hayneville                                 | 275  | \$126   | \$5,040  | 8.6%  | 24  | \$126    | \$5,040   | 8.6%   | 24   | \$126 | \$5,040  | 8.6%  | 24  |
| 7810 | Lowndes   | Unincorporated | OWTS                                               | 1031 | \$1,819 | \$72,778 | 76.5% | 789 | \$20,000 | \$800,000 | 100.0% | 1031 | \$100 | \$4,000  | 6.3%  | 65  |
| 7810 | Lowndes   | White Hall     | OWTS                                               | 78   | \$1,819 | \$72,776 | 76.5% | 60  | \$20,000 | \$800,000 | 100.0% | 78   | \$100 | \$4,000  | 6.3%  | 5   |
| 7810 | Lowndes   | Lowndesboro    | OWTS                                               | 4    | \$1,819 | \$72,776 | 76.5% | 3   | \$20,000 | \$800,000 | 100.0% | 4    | \$100 | \$4,000  | 6.3%  | 0   |
| 7810 | Lowndes   | Benton         | OWTS                                               | 2    | \$1,819 | \$72,776 | 76.5% | 1   | \$20,000 | \$800,000 | 100.0% | 2    | \$100 | \$4,000  | 6.3%  | 0   |
| 7810 | Lowndes   | Gordonville    | OWTS                                               | 1    | \$1,819 | \$72,776 | 76.5% | 0   | \$20,000 | \$800,000 | 100.0% | 1    | \$100 | \$4,000  | 6.3%  | 0   |
| 7810 | Lowndes   | Mosses         | Mosses Water, Sewer, and Fire Protection Authority | 21   | \$225   | \$9,000  | 14.2% | 3   | \$225    | \$9,000   | 14.2%  | 3    | \$225 | \$9,000  | 14.2% | 3   |
| 7811 | Lowndes   | Unincorporated | OWTS                                               | 621  | \$1,819 | \$72,778 | 84.9% | 527 | \$20,000 | \$800,000 | 100.0% | 621  | \$100 | \$4,000  | 6.4%  | 40  |
| 7811 | Lowndes   | Gordonville    | OWTS                                               | 24   | \$1,819 | \$72,776 | 84.9% | 20  | \$20,000 | \$800,000 | 100.0% | 24   | \$100 | \$4,000  | 6.4%  | 2   |
| 7811 | Lowndes   | Mosses         | Mosses Water, Sewer, and Fire Protection Authority | 38   | \$225   | \$9,000  | 14.4% | 5   | \$225    | \$9,000   | 14.4%  | 5    | \$225 | \$9,000  | 14.4% | 5   |
| 7812 | Lowndes   | Unincorporated | OWTS                                               | 609  | \$1,819 | \$72,778 | 78.0% | 475 | \$20,000 | \$800,000 | 100.0% | 609  | \$100 | \$4,000  | 2.6%  | 16  |
| 7812 | Lowndes   | Fort Deposit   | Fort Deposit Water Works and Sewer Board           | 510  | \$598   | \$23,928 | 39.1% | 199 | \$598    | \$23,928  | 39.1%  | 199  | \$598 | \$23,928 | 39.1% | 199 |
| 2314 | Macon     | Unincorporated | OWTS                                               | 637  | \$1,819 | \$72,778 | 77.3% | 493 | \$20,000 | \$800,000 | 99.9%  | 637  | \$100 | \$4,000  | 6.2%  | 39  |
| 2315 | Macon     | Tuskegee       | Utilities Board of the City of Tuskegee            | 1036 | \$658   | \$26,338 | 37.1% | 384 | \$658    | \$26,338  | 37.1%  | 384  | \$658 | \$26,338 | 37.1% | 384 |
| 2315 | Macon     | Notasulga      | Town of Notasulga                                  | 159  | \$372   | \$14,880 | 18.9% | 30  | \$372    | \$14,880  | 18.9%  | 30   | \$372 | \$14,880 | 18.9% | 30  |
| 2316 | Macon     | Unincorporated | OWTS                                               | 513  | \$1,819 | \$72,778 | 78.3% | 402 | \$20,000 | \$800,000 | 100.0% | 513  | \$100 | \$4,000  | 9.8%  | 50  |
| 2316 | Macon     | Franklin       | OWTS                                               | 13   | \$1,819 | \$72,776 | 58.2% | 7   | \$20,000 | \$800,000 | 100.0% | 13   | \$100 | \$4,000  | 3.0%  | 0   |
| 2316 | Macon     | Shorter        | Town of Shorter                                    | 7    | \$384   | \$15,360 | 10.3% | 1   | \$384    | \$15,360  | 10.3%  | 1    | \$384 | \$15,360 | 10.3% | 1   |
| 2316 | Macon     | Unincorporated | OWTS                                               | 148  | \$1,819 | \$72,778 | 78.3% | 116 | \$20,000 | \$800,000 | 100.0% | 148  | \$100 | \$4,000  | 9.8%  | 15  |
| 2316 | Macon     | Tuskegee       | Utilities Board of the City of Tuskegee            | 603  | \$658   | \$26,338 | 52.7% | 318 | \$658    | \$26,338  | 52.7%  | 318  | \$658 | \$26,338 | 52.7% | 318 |
| 2316 | Macon     | Tuskegee       | Utilities Board of the City of Tuskegee            | 422  | \$658   | \$26,338 | 25.8% | 109 | \$658    | \$26,338  | 25.8%  | 109  | \$658 | \$26,338 | 25.8% | 109 |
| 2317 | Macon     | Tuskegee       | Utilities Board of the City of Tuskegee            | 168  | \$658   | \$26,338 | 56.5% | 95  | \$658    | \$26,338  | 56.5%  | 95   | \$658 | \$26,338 | 56.5% | 95  |
| 2318 | Macon     | Tuskegee       | Utilities Board of the City of Tuskegee            | 481  | \$658   | \$26,338 | 49.4% | 238 | \$658    | \$26,338  | 49.4%  | 238  | \$658 | \$26,338 | 49.4% | 238 |
| 2319 | Macon     | Tuskegee       | Utilities Board of the City of Tuskegee            | 600  | \$658   | \$26,338 | 44.7% | 268 | \$658    | \$26,338  | 44.7%  | 268  | \$658 | \$26,338 | 44.7% | 268 |
| 2320 | Macon     | Tuskegee       | Utilities Board of the City of Tuskegee            | 425  | \$658   | \$26,338 | 51.3% | 218 | \$658    | \$26,338  | 51.3%  | 218  | \$658 | \$26,338 | 51.3% | 218 |



|       |         |                |                                                   |      |         |          |       |     |          |           |        |     |       |          |       |     |
|-------|---------|----------------|---------------------------------------------------|------|---------|----------|-------|-----|----------|-----------|--------|-----|-------|----------|-------|-----|
| 2321  | Macon   | Tuskegee       | Utilities Board of the City of Tuskegee           | 643  | \$658   | \$26,338 | 39.6% | 254 | \$658    | \$26,338  | 39.6%  | 254 | \$658 | \$26,338 | 39.6% | 254 |
| 2322  | Macon   | Unincorporated | OWTS                                              | 864  | \$1,819 | \$72,778 | 77.9% | 673 | \$20,000 | \$800,000 | 99.9%  | 864 | \$100 | \$4,000  | 6.7%  | 58  |
| 2322  | Macon   | Shorter        | Town of Shorter                                   | 111  | \$384   | \$15,360 | 24.8% | 28  | \$384    | \$15,360  | 24.8%  | 28  | \$384 | \$15,360 | 24.8% | 28  |
| 2323  | Macon   | Unincorporated | OWTS                                              | 571  | \$1,819 | \$72,778 | 82.1% | 469 | \$20,000 | \$800,000 | 100.0% | 571 | \$100 | \$4,000  | 5.6%  | 32  |
| 2323  | Macon   | Tuskegee       | Utilities Board of the City of Tuskegee           | 74   | \$658   | \$26,338 | 46.2% | 34  | \$658    | \$26,338  | 46.2%  | 34  | \$658 | \$26,338 | 46.2% | 34  |
| 2.01  | Madison | Huntsville     | City of Huntsville                                | 364  | \$348   | \$13,910 | 27.2% | 99  | \$348    | \$13,910  | 27.2%  | 99  | \$348 | \$13,910 | 27.2% | 99  |
| 2.02  | Madison | Huntsville     | City of Huntsville                                | 813  | \$348   | \$13,910 | 32.7% | 266 | \$348    | \$13,910  | 32.7%  | 266 | \$348 | \$13,910 | 32.7% | 266 |
| 3.01  | Madison | Huntsville     | City of Huntsville                                | 1569 | \$348   | \$13,910 | 14.9% | 234 | \$348    | \$13,910  | 14.9%  | 234 | \$348 | \$13,910 | 14.9% | 234 |
| 3.02  | Madison | Huntsville     | City of Huntsville                                | 1394 | \$348   | \$13,910 | 18.4% | 256 | \$348    | \$13,910  | 18.4%  | 256 | \$348 | \$13,910 | 18.4% | 256 |
| 4.03  | Madison | Huntsville     | City of Huntsville                                | 1975 | \$348   | \$13,910 | 15.0% | 296 | \$348    | \$13,910  | 15.0%  | 296 | \$348 | \$13,910 | 15.0% | 296 |
| 5.01  | Madison | Huntsville     | City of Huntsville                                | 772  | \$348   | \$13,910 | 17.1% | 132 | \$348    | \$13,910  | 17.1%  | 132 | \$348 | \$13,910 | 17.1% | 132 |
| 5.02  | Madison | Huntsville     | City of Huntsville                                | 945  | \$348   | \$13,910 | 8.1%  | 76  | \$348    | \$13,910  | 8.1%   | 76  | \$348 | \$13,910 | 8.1%  | 76  |
| 5.03  | Madison | Huntsville     | City of Huntsville                                | 759  | \$348   | \$13,910 | 9.1%  | 69  | \$348    | \$13,910  | 9.1%   | 69  | \$348 | \$13,910 | 9.1%  | 69  |
| 6.01  | Madison | Huntsville     | City of Huntsville                                | 513  | \$348   | \$13,910 | 7.8%  | 40  | \$348    | \$13,910  | 7.8%   | 40  | \$348 | \$13,910 | 7.8%  | 40  |
| 6.02  | Madison | Huntsville     | City of Huntsville                                | 835  | \$348   | \$13,910 | 14.2% | 119 | \$348    | \$13,910  | 14.2%  | 119 | \$348 | \$13,910 | 14.2% | 119 |
| 7.01  | Madison | Huntsville     | City of Huntsville                                | 1152 | \$348   | \$13,910 | 13.7% | 157 | \$348    | \$13,910  | 13.7%  | 157 | \$348 | \$13,910 | 13.7% | 157 |
| 7.02  | Madison | Huntsville     | City of Huntsville                                | 1141 | \$348   | \$13,910 | 18.9% | 216 | \$348    | \$13,910  | 18.9%  | 216 | \$348 | \$13,910 | 18.9% | 216 |
| 9.01  | Madison | Huntsville     | City of Huntsville                                | 2077 | \$348   | \$13,910 | 6.0%  | 126 | \$348    | \$13,910  | 6.0%   | 126 | \$348 | \$13,910 | 6.0%  | 126 |
| 9.02  | Madison | Huntsville     | City of Huntsville                                | 1088 | \$348   | \$13,910 | 6.7%  | 73  | \$348    | \$13,910  | 6.7%   | 73  | \$348 | \$13,910 | 6.7%  | 73  |
| 10    | Madison | Huntsville     | City of Huntsville                                | 1636 | \$348   | \$13,910 | 11.5% | 188 | \$348    | \$13,910  | 11.5%  | 188 | \$348 | \$13,910 | 11.5% | 188 |
| 12    | Madison | Huntsville     | City of Huntsville                                | 1264 | \$348   | \$13,910 | 53.8% | 680 | \$348    | \$13,910  | 53.8%  | 680 | \$348 | \$13,910 | 53.8% | 680 |
| 13.01 | Madison | Huntsville     | City of Huntsville                                | 1898 | \$348   | \$13,910 | 30.2% | 572 | \$348    | \$13,910  | 30.2%  | 572 | \$348 | \$13,910 | 30.2% | 572 |
| 13.02 | Madison | Huntsville     | City of Huntsville                                | 938  | \$348   | \$13,910 | 20.5% | 192 | \$348    | \$13,910  | 20.5%  | 192 | \$348 | \$13,910 | 20.5% | 192 |
| 14.01 | Madison | Madison        | Water and Wastewater Board of the City of Madison | 58   | \$445   | \$17,798 | 12.0% | 7   | \$445    | \$17,798  | 12.0%  | 7   | \$445 | \$17,798 | 12.0% | 7   |
| 14.01 | Madison | Huntsville     | City of Huntsville                                | 913  | \$348   | \$13,910 | 9.5%  | 86  | \$348    | \$13,910  | 9.5%   | 86  | \$348 | \$13,910 | 9.5%  | 86  |
| 14.02 | Madison | Huntsville     | City of Huntsville                                | 2951 | \$348   | \$13,910 | 15.4% | 455 | \$348    | \$13,910  | 15.4%  | 455 | \$348 | \$13,910 | 15.4% | 455 |
| 15    | Madison | Huntsville     | City of Huntsville                                | 1630 | \$348   | \$13,910 | 17.8% | 290 | \$348    | \$13,910  | 17.8%  | 290 | \$348 | \$13,910 | 17.8% | 290 |
| 17    | Madison | Huntsville     | City of Huntsville                                | 779  | \$348   | \$13,910 | 0.9%  | 7   | \$348    | \$13,910  | 0.9%   | 7   | \$348 | \$13,910 | 0.9%  | 7   |
| 18.01 | Madison | Huntsville     | City of Huntsville                                | 1494 | \$348   | \$13,910 | 2.0%  | 29  | \$348    | \$13,910  | 2.0%   | 29  | \$348 | \$13,910 | 2.0%  | 29  |
| 19.01 | Madison | Huntsville     | City of Huntsville                                | 1414 | \$348   | \$13,910 | 4.1%  | 59  | \$348    | \$13,910  | 4.1%   | 59  | \$348 | \$13,910 | 4.1%  | 59  |
| 19.02 | Madison | Huntsville     | City of Huntsville                                | 856  | \$348   | \$13,910 | 7.7%  | 66  | \$348    | \$13,910  | 7.7%   | 66  | \$348 | \$13,910 | 7.7%  | 66  |
| 19.03 | Madison | Huntsville     | City of Huntsville                                | 849  | \$348   | \$13,910 | 2.6%  | 22  | \$348    | \$13,910  | 2.6%   | 22  | \$348 | \$13,910 | 2.6%  | 22  |
| 20    | Madison | Huntsville     | City of Huntsville                                | 993  | \$348   | \$13,910 | 6.1%  | 60  | \$348    | \$13,910  | 6.1%   | 60  | \$348 | \$13,910 | 6.1%  | 60  |
| 21    | Madison | Huntsville     | City of Huntsville                                | 1459 | \$348   | \$13,910 | 38.8% | 566 | \$348    | \$13,910  | 38.8%  | 566 | \$348 | \$13,910 | 38.8% | 566 |
| 22    | Madison | Huntsville     | City of Huntsville                                | 844  | \$348   | \$13,910 | 22.9% | 194 | \$348    | \$13,910  | 22.9%  | 194 | \$348 | \$13,910 | 22.9% | 194 |
| 23    | Madison | Huntsville     | City of Huntsville                                | 2138 | \$348   | \$13,910 | 14.7% | 315 | \$348    | \$13,910  | 14.7%  | 315 | \$348 | \$13,910 | 14.7% | 315 |
| 24    | Madison | Huntsville     | City of Huntsville                                | 2028 | \$348   | \$13,910 | 23.6% | 479 | \$348    | \$13,910  | 23.6%  | 479 | \$348 | \$13,910 | 23.6% | 479 |
| 25.01 | Madison | Huntsville     | City of Huntsville                                | 1595 | \$348   | \$13,910 | 27.5% | 439 | \$348    | \$13,910  | 27.5%  | 439 | \$348 | \$13,910 | 27.5% | 439 |

|        |         |                |                                                             |      |       |          |       |     |         |           |        |      |       |          |       |     |
|--------|---------|----------------|-------------------------------------------------------------|------|-------|----------|-------|-----|---------|-----------|--------|------|-------|----------|-------|-----|
| 25.02  | Madison | Huntsville     | City of Huntsville                                          | 1523 | \$348 | \$13,910 | 20.0% | 305 | \$348   | \$13,910  | 20.0%  | 305  | \$348 | \$13,910 | 20.0% | 305 |
| 26     | Madison | Huntsville     | City of Huntsville                                          | 1994 | \$348 | \$13,910 | 7.4%  | 149 | \$348   | \$13,910  | 7.4%   | 149  | \$348 | \$13,910 | 7.4%  | 149 |
| 27.01  | Madison | Huntsville     | City of Huntsville                                          | 1339 | \$348 | \$13,910 | 9.8%  | 131 | \$348   | \$13,910  | 9.8%   | 131  | \$348 | \$13,910 | 9.8%  | 131 |
| 27.21  | Madison | Huntsville     | City of Huntsville                                          | 1841 | \$348 | \$13,910 | 7.0%  | 128 | \$348   | \$13,910  | 7.0%   | 128  | \$348 | \$13,910 | 7.0%  | 128 |
| 27.22  | Madison | Huntsville     | City of Huntsville                                          | 1219 | \$348 | \$13,910 | 2.2%  | 27  | \$348   | \$13,910  | 2.2%   | 27   | \$348 | \$13,910 | 2.2%  | 27  |
| 28.01  | Madison | Huntsville     | City of Huntsville                                          | 2280 | \$348 | \$13,910 | 10.9% | 249 | \$348   | \$13,910  | 10.9%  | 249  | \$348 | \$13,910 | 10.9% | 249 |
| 28.02  | Madison | Huntsville     | City of Huntsville                                          | 3078 | \$348 | \$13,910 | 8.6%  | 266 | \$348   | \$13,910  | 8.6%   | 266  | \$348 | \$13,910 | 8.6%  | 266 |
| 29.11  | Madison | Huntsville     | City of Huntsville                                          | 1699 | \$348 | \$13,910 | 3.8%  | 64  | \$348   | \$13,910  | 3.8%   | 64   | \$348 | \$13,910 | 3.8%  | 64  |
| 29.12  | Madison | Huntsville     | City of Huntsville                                          | 1004 | \$348 | \$13,910 | 2.4%  | 24  | \$348   | \$13,910  | 2.4%   | 24   | \$348 | \$13,910 | 2.4%  | 24  |
| 29.21  | Madison | Huntsville     | City of Huntsville                                          | 2803 | \$348 | \$13,910 | 9.8%  | 276 | \$348   | \$13,910  | 9.8%   | 276  | \$348 | \$13,910 | 9.8%  | 276 |
| 29.22  | Madison | Huntsville     | City of Huntsville                                          | 1552 | \$348 | \$13,910 | 0.5%  | 7   | \$348   | \$13,910  | 0.5%   | 7    | \$348 | \$13,910 | 0.5%  | 7   |
| 30     | Madison | Huntsville     | City of Huntsville                                          | 1113 | \$348 | \$13,910 | 35.4% | 393 | \$348   | \$13,910  | 35.4%  | 393  | \$348 | \$13,910 | 35.4% | 393 |
| 31     | Madison | Huntsville     | City of Huntsville                                          | 1428 | \$348 | \$13,910 | 23.1% | 329 | \$348   | \$13,910  | 23.1%  | 329  | \$348 | \$13,910 | 23.1% | 329 |
| 101    | Madison | New Market     | Integra Water Madison County, LLC                           | 3000 | \$654 | \$26,160 | 15.0% | 449 | \$654   | \$26,160  | 15.0%  | 449  | \$654 | \$26,160 | 15.0% | 449 |
| 101    | Madison | Huntsville     | City of Huntsville                                          | 849  | \$348 | \$13,910 | 5.5%  | 47  | \$348   | \$13,910  | 5.5%   | 47   | \$348 | \$13,910 | 5.5%  | 47  |
| 102    | Madison | Gurley         | Town of Gurley                                              | 19   | \$485 | \$19,416 | 7.0%  | 1   | \$485   | \$19,416  | 7.0%   | 1    | \$485 | \$19,416 | 7.0%  | 1   |
| 102    | Madison | Huntsville     | City of Huntsville                                          | 2318 | \$348 | \$13,910 | 4.6%  | 106 | \$348   | \$13,910  | 4.6%   | 106  | \$348 | \$13,910 | 4.6%  | 106 |
| 103.01 | Madison | Unincorporated | OWTS                                                        | 3062 | \$530 | \$21,192 | 16.5% | 505 | \$5,000 | \$200,000 | 100.0% | 3062 | \$100 | \$4,000  | 1.7%  | 51  |
| 103.02 | Madison | Unincorporated | OWTS                                                        | 1686 | \$530 | \$21,192 | 14.1% | 238 | \$5,000 | \$200,000 | 99.9%  | 1686 | \$100 | \$4,000  | 1.4%  | 24  |
| 104.01 | Madison | Unincorporated | OWTS                                                        | 2402 | \$530 | \$21,192 | 8.3%  | 200 | \$5,000 | \$200,000 | 100.0% | 2402 | \$100 | \$4,000  | 0.7%  | 17  |
| 104.02 | Madison | Huntsville     | City of Huntsville                                          | 2455 | \$348 | \$13,910 | 4.9%  | 121 | \$348   | \$13,910  | 4.9%   | 121  | \$348 | \$13,910 | 4.9%  | 121 |
| 105.01 | Madison | Harvest        | Harvest-Monrovia Water, Sewer and Fire Protection Authority | 4561 | \$579 | \$23,165 | 11.0% | 503 | \$579   | \$23,165  | 11.0%  | 503  | \$579 | \$23,165 | 11.0% | 503 |
| 105.02 | Madison | Harvest        | Harvest-Monrovia Water, Sewer and Fire Protection Authority | 428  | \$579 | \$23,165 | 10.3% | 44  | \$579   | \$23,165  | 10.3%  | 44   | \$579 | \$23,165 | 10.3% | 44  |
| 105.02 | Madison | Huntsville     | City of Huntsville                                          | 887  | \$348 | \$13,910 | 5.5%  | 49  | \$348   | \$13,910  | 5.5%   | 49   | \$348 | \$13,910 | 5.5%  | 49  |
| 106.12 | Madison | Madison        | Water and Wastewater Board of the City of Madison           | 123  | \$445 | \$17,798 | 5.5%  | 7   | \$445   | \$17,798  | 5.5%   | 7    | \$445 | \$17,798 | 5.5%  | 7   |
| 106.12 | Madison | Huntsville     | City of Huntsville                                          | 2542 | \$348 | \$13,910 | 4.5%  | 115 | \$348   | \$13,910  | 4.5%   | 115  | \$348 | \$13,910 | 4.5%  | 115 |
| 106.21 | Madison | Huntsville     | City of Huntsville                                          | 2790 | \$348 | \$13,910 | 3.0%  | 83  | \$348   | \$13,910  | 3.0%   | 83   | \$348 | \$13,910 | 3.0%  | 83  |
| 106.22 | Madison | Huntsville     | City of Huntsville                                          | 5776 | \$348 | \$13,910 | 14.0% | 806 | \$348   | \$13,910  | 14.0%  | 806  | \$348 | \$13,910 | 14.0% | 806 |
| 106.23 | Madison | Huntsville     | City of Huntsville                                          | 2472 | \$348 | \$13,910 | 1.1%  | 28  | \$348   | \$13,910  | 1.1%   | 28   | \$348 | \$13,910 | 1.1%  | 28  |
| 106.24 | Madison | Huntsville     | City of Huntsville                                          | 3036 | \$348 | \$13,910 | 3.5%  | 106 | \$348   | \$13,910  | 3.5%   | 106  | \$348 | \$13,910 | 3.5%  | 106 |
| 107.01 | Madison | Meridianville  | Integra Water Madison County, LLC                           | 1176 | \$654 | \$26,160 | 14.2% | 168 | \$654   | \$26,160  | 14.2%  | 168  | \$654 | \$26,160 | 14.2% | 168 |
| 107.01 | Madison | Huntsville     | City of Huntsville                                          | 2598 | \$348 | \$13,910 | 6.8%  | 178 | \$348   | \$13,910  | 6.8%   | 178  | \$348 | \$13,910 | 6.8%  | 178 |
| 107.02 | Madison | Huntsville     | City of Huntsville                                          | 3218 | \$348 | \$13,910 | 4.7%  | 152 | \$348   | \$13,910  | 4.7%   | 152  | \$348 | \$13,910 | 4.7%  | 152 |
| 108    | Madison | Huntsville     | City of Huntsville                                          | 3925 | \$348 | \$13,910 | 4.3%  | 170 | \$348   | \$13,910  | 4.3%   | 170  | \$348 | \$13,910 | 4.3%  | 170 |

|        |         |                   |                                                   |      |         |          |       |     |          |           |       |     |       |          |       |     |
|--------|---------|-------------------|---------------------------------------------------|------|---------|----------|-------|-----|----------|-----------|-------|-----|-------|----------|-------|-----|
| 109.01 | Madison | Huntsville        | City of Huntsville                                | 6071 | \$348   | \$13,910 | 1.9%  | 118 | \$348    | \$13,910  | 1.9%  | 118 | \$348 | \$13,910 | 1.9%  | 118 |
| 109.02 | Madison | Gurley            | Town of Gurley                                    | 295  | \$485   | \$19,416 | 19.5% | 58  | \$485    | \$19,416  | 19.5% | 58  | \$485 | \$19,416 | 19.5% | 58  |
| 109.02 | Madison | Huntsville        | City of Huntsville                                | 897  | \$348   | \$13,910 | 12.0% | 107 | \$348    | \$13,910  | 12.0% | 107 | \$348 | \$13,910 | 12.0% | 107 |
| 110.11 | Madison | Madison           | Water and Wastewater Board of the City of Madison | 2380 | \$445   | \$17,798 | 4.7%  | 111 | \$445    | \$17,798  | 4.7%  | 111 | \$445 | \$17,798 | 4.7%  | 111 |
| 110.11 | Madison | Huntsville        | City of Huntsville                                | 1085 | \$348   | \$13,910 | 3.5%  | 38  | \$348    | \$13,910  | 3.5%  | 38  | \$348 | \$13,910 | 3.5%  | 38  |
| 110.12 | Madison | Madison           | Water and Wastewater Board of the City of Madison | 1544 | \$445   | \$17,798 | 3.8%  | 59  | \$445    | \$17,798  | 3.8%  | 59  | \$445 | \$17,798 | 3.8%  | 59  |
| 110.12 | Madison | Huntsville        | City of Huntsville                                | 584  | \$348   | \$13,910 | 2.4%  | 14  | \$348    | \$13,910  | 2.4%  | 14  | \$348 | \$13,910 | 2.4%  | 14  |
| 110.13 | Madison | Madison           | Water and Wastewater Board of the City of Madison | 1303 | \$445   | \$17,798 | 7.4%  | 97  | \$445    | \$17,798  | 7.4%  | 97  | \$445 | \$17,798 | 7.4%  | 97  |
| 110.13 | Madison | Huntsville        | City of Huntsville                                | 709  | \$348   | \$13,910 | 6.2%  | 44  | \$348    | \$13,910  | 6.2%  | 44  | \$348 | \$13,910 | 6.2%  | 44  |
| 110.14 | Madison | Madison           | Water and Wastewater Board of the City of Madison | 3622 | \$445   | \$17,798 | 4.2%  | 152 | \$445    | \$17,798  | 4.2%  | 152 | \$445 | \$17,798 | 4.2%  | 152 |
| 110.21 | Madison | Madison           | Water and Wastewater Board of the City of Madison | 2044 | \$445   | \$17,798 | 8.4%  | 172 | \$445    | \$17,798  | 8.4%  | 172 | \$445 | \$17,798 | 8.4%  | 172 |
| 110.21 | Madison | Huntsville        | City of Huntsville                                | 555  | \$348   | \$13,910 | 4.8%  | 26  | \$348    | \$13,910  | 4.8%  | 26  | \$348 | \$13,910 | 4.8%  | 26  |
| 110.22 | Madison | Madison           | Water and Wastewater Board of the City of Madison | 2276 | \$445   | \$17,798 | 9.7%  | 220 | \$445    | \$17,798  | 9.7%  | 220 | \$445 | \$17,798 | 9.7%  | 220 |
| 110.22 | Madison | Huntsville        | City of Huntsville                                | 1282 | \$348   | \$13,910 | 6.4%  | 82  | \$348    | \$13,910  | 6.4%  | 82  | \$348 | \$13,910 | 6.4%  | 82  |
| 111    | Madison | Huntsville        | City of Huntsville                                | 351  | \$348   | \$13,910 | 5.5%  | 19  | \$348    | \$13,910  | 5.5%  | 19  | \$348 | \$13,910 | 5.5%  | 19  |
| 112    | Madison | Madison           | Water and Wastewater Board of the City of Madison | 452  | \$445   | \$17,798 | 5.4%  | 25  | \$445    | \$17,798  | 5.4%  | 25  | \$445 | \$17,798 | 5.4%  | 25  |
| 112    | Madison | Triana            | Triana                                            | 1332 | \$353   | \$14,112 | 4.1%  | 55  | \$353    | \$14,112  | 4.1%  | 55  | \$353 | \$14,112 | 4.1%  | 55  |
| 112    | Madison | Huntsville        | City of Huntsville                                | 3624 | \$348   | \$13,910 | 4.0%  | 145 | \$348    | \$13,910  | 4.0%  | 145 | \$348 | \$13,910 | 4.0%  | 145 |
| 113    | Madison | Owens Cross Roads | Town of Owens Cross Roads                         | 463  | \$528   | \$21,120 | 9.4%  | 43  | \$528    | \$21,120  | 9.4%  | 43  | \$528 | \$21,120 | 9.4%  | 43  |
| 113    | Madison | New Hope          | City of New Hope                                  | 108  | \$484   | \$19,373 | 7.9%  | 8   | \$484    | \$19,373  | 7.9%  | 8   | \$484 | \$19,373 | 7.9%  | 8   |
| 113    | Madison | Huntsville        | City of Huntsville                                | 2194 | \$348   | \$13,910 | 3.9%  | 85  | \$348    | \$13,910  | 3.9%  | 85  | \$348 | \$13,910 | 3.9%  | 85  |
| 114    | Madison | Unincorporated    | OWTS                                              | 521  | \$530   | \$21,192 | 18.2% | 95  | \$5,000  | \$200,000 | 99.9% | 521 | \$100 | \$4,000  | 2.2%  | 11  |
| 114    | Madison | Owens Cross Roads | Town of Owens Cross Roads                         | 135  | \$528   | \$21,120 | 18.1% | 24  | \$528    | \$21,120  | 18.1% | 24  | \$528 | \$21,120 | 18.1% | 24  |
| 114    | Madison | New Hope          | City of New Hope                                  | 1030 | \$484   | \$19,373 | 15.8% | 163 | \$484    | \$19,373  | 15.8% | 163 | \$484 | \$19,373 | 15.8% | 163 |
| 9729   | Marengo | Unincorporated    | OWTS                                              | 392  | \$1,819 | \$72,778 | 88.7% | 347 | \$20,000 | \$800,000 | 99.8% | 392 | \$100 | \$4,000  | 10.5% | 41  |

|      |         |                |                                                          |      |         |          |       |     |          |           |        |      |       |          |       |     |
|------|---------|----------------|----------------------------------------------------------|------|---------|----------|-------|-----|----------|-----------|--------|------|-------|----------|-------|-----|
| 9729 | Marengo | Demopolis      | The Water Works and Sewer Board of the City of Demopolis | 1684 | \$336   | \$13,421 | 32.8% | 552 | \$336    | \$13,421  | 32.8%  | 552  | \$336 | \$13,421 | 32.8% | 552 |
| 9730 | Marengo | Unincorporated | OWTS                                                     | 457  | \$1,819 | \$72,778 | 77.2% | 353 | \$20,000 | \$800,000 | 100.0% | 457  | \$100 | \$4,000  | 5.1%  | 23  |
| 9730 | Marengo | Myrtlewood     | OWTS                                                     | 14   | \$1,819 | \$72,776 | 77.2% | 11  | \$20,000 | \$800,000 | 100.0% | 14   | \$100 | \$4,000  | 5.1%  | 1   |
| 9730 | Marengo | Providence     | OWTS                                                     | 9    | \$1,819 | \$72,776 | 77.2% | 7   | \$20,000 | \$800,000 | 100.0% | 9    | \$100 | \$4,000  | 5.1%  | 0   |
| 9730 | Marengo | Linden         | Utilities Board of The City of Linden                    | 951  | \$297   | \$11,899 | 17.1% | 163 | \$297    | \$11,899  | 17.1%  | 163  | \$297 | \$11,899 | 17.1% | 163 |
| 9731 | Marengo | Unincorporated | OWTS                                                     | 759  | \$1,819 | \$72,778 | 81.5% | 619 | \$20,000 | \$800,000 | 100.0% | 759  | \$100 | \$4,000  | 10.4% | 79  |
| 9731 | Marengo | Thomaston      | OWTS                                                     | 6    | \$1,819 | \$72,776 | 81.5% | 5   | \$20,000 | \$800,000 | 100.0% | 6    | \$100 | \$4,000  | 10.4% | 1   |
| 9731 | Marengo | Dayton         | OWTS                                                     | 3    | \$1,819 | \$72,776 | 81.5% | 3   | \$20,000 | \$800,000 | 100.0% | 3    | \$100 | \$4,000  | 10.4% | 0   |
| 9731 | Marengo | Faunsdale      | OWTS                                                     | 1    | \$1,819 | \$72,776 | 81.5% | 1   | \$20,000 | \$800,000 | 100.0% | 1    | \$100 | \$4,000  | 10.4% | 0   |
| 9732 | Marengo | Unincorporated | OWTS                                                     | 1048 | \$1,819 | \$72,778 | 68.2% | 715 | \$20,000 | \$800,000 | 100.0% | 1048 | \$100 | \$4,000  | 7.6%  | 79  |
| 9733 | Marengo | Unincorporated | OWTS                                                     | 690  | \$1,819 | \$72,778 | 75.0% | 517 | \$20,000 | \$800,000 | 100.0% | 690  | \$100 | \$4,000  | 4.6%  | 32  |
| 9733 | Marengo | Sweet Water    | OWTS                                                     | 7    | \$1,819 | \$72,776 | 75.0% | 6   | \$20,000 | \$800,000 | 100.0% | 7    | \$100 | \$4,000  | 4.6%  | 0   |
| 9734 | Marengo | Unincorporated | OWTS                                                     | 6    | \$1,819 | \$72,778 | 56.3% | 3   | \$20,000 | \$800,000 | 99.9%  | 6    | \$100 | \$4,000  | 2.8%  | 0   |
| 9734 | Marengo | Demopolis      | The Water Works and Sewer Board of the City of Demopolis | 1334 | \$336   | \$13,421 | 8.4%  | 112 | \$336    | \$13,421  | 8.4%   | 112  | \$336 | \$13,421 | 8.4%  | 112 |
| 9640 | Marion  | Unincorporated | OWTS                                                     | 1630 | \$530   | \$21,192 | 32.0% | 522 | \$5,000  | \$200,000 | 100.0% | 1630 | \$100 | \$4,000  | 2.8%  | 46  |
| 9640 | Marion  | Bear Creek     | OWTS                                                     | 266  | \$530   | \$21,194 | 32.0% | 85  | \$5,000  | \$200,000 | 100.0% | 266  | \$100 | \$4,000  | 2.8%  | 8   |
| 9640 | Marion  | Haleyville     | Haleyville Waterworks & Sewer Board                      | 136  | \$349   | \$13,954 | 17.5% | 24  | \$349    | \$13,954  | 17.5%  | 24   | \$349 | \$13,954 | 17.5% | 24  |
| 9641 | Marion  | Unincorporated | OWTS                                                     | 802  | \$530   | \$21,192 | 34.7% | 279 | \$5,000  | \$200,000 | 100.0% | 802  | \$100 | \$4,000  | 5.1%  | 41  |
| 9641 | Marion  | Bear Creek     | OWTS                                                     | 1    | \$530   | \$21,194 | 34.7% | 0   | \$5,000  | \$200,000 | 100.0% | 1    | \$100 | \$4,000  | 5.1%  | 0   |
| 9641 | Marion  | Hackleburg     | Hackleburg Water and Sewer Board                         | 255  | \$240   | \$9,600  | 12.3% | 31  | \$240    | \$9,600   | 12.3%  | 31   | \$240 | \$9,600  | 12.3% | 31  |
| 9642 | Marion  | Unincorporated | OWTS                                                     | 615  | \$530   | \$21,192 | 23.4% | 144 | \$5,000  | \$200,000 | 100.0% | 615  | \$100 | \$4,000  | 2.2%  | 13  |
| 9643 | Marion  | Unincorporated | OWTS                                                     | 1537 | \$530   | \$21,192 | 25.8% | 397 | \$5,000  | \$200,000 | 100.0% | 1537 | \$100 | \$4,000  | 4.3%  | 66  |
| 9643 | Marion  | Hamilton       | City of Hamilton                                         | 371  | \$225   | \$9,019  | 9.7%  | 36  | \$225    | \$9,019   | 9.7%   | 36   | \$225 | \$9,019  | 9.7%  | 36  |
| 9644 | Marion  | Unincorporated | OWTS                                                     | 1355 | \$530   | \$21,192 | 33.6% | 455 | \$5,000  | \$200,000 | 100.0% | 1355 | \$100 | \$4,000  | 2.2%  | 30  |
| 9644 | Marion  | Hamilton       | City of Hamilton                                         | 806  | \$225   | \$9,019  | 5.1%  | 41  | \$225    | \$9,019   | 5.1%   | 41   | \$225 | \$9,019  | 5.1%  | 41  |
| 9645 | Marion  | Unincorporated | OWTS                                                     | 721  | \$530   | \$21,192 | 23.6% | 170 | \$5,000  | \$200,000 | 100.0% | 721  | \$100 | \$4,000  | 2.5%  | 18  |
| 9645 | Marion  | Twin           | OWTS                                                     | 5    | \$530   | \$21,194 | 23.6% | 1   | \$5,000  | \$200,000 | 100.0% | 5    | \$100 | \$4,000  | 2.5%  | 0   |
| 9645 | Marion  | Winfield       | Winfield Water Works & Sewer Board                       | 63   | \$512   | \$20,467 | 22.4% | 14  | \$512    | \$20,467  | 22.4%  | 14   | \$512 | \$20,467 | 22.4% | 14  |
| 9645 | Marion  | Brilliant      | Town of Brilliant                                        | 62   | \$213   | \$8,520  | 5.4%  | 3   | \$213    | \$8,520   | 5.4%   | 3    | \$213 | \$8,520  | 5.4%  | 3   |
| 9646 | Marion  | Unincorporated | OWTS                                                     | 704  | \$530   | \$21,192 | 41.1% | 290 | \$5,000  | \$200,000 | 99.9%  | 704  | \$100 | \$4,000  | 6.4%  | 45  |
| 9646 | Marion  | Gu-Win         | OWTS                                                     | 44   | \$530   | \$21,194 | 41.1% | 18  | \$5,000  | \$200,000 | 99.9%  | 44   | \$100 | \$4,000  | 6.4%  | 3   |
| 9646 | Marion  | Twin           | OWTS                                                     | 26   | \$530   | \$21,194 | 41.1% | 11  | \$5,000  | \$200,000 | 99.9%  | 26   | \$100 | \$4,000  | 6.4%  | 2   |
| 9646 | Marion  | Winfield       | Winfield Water Works & Sewer Board                       | 4    | \$512   | \$20,467 | 39.7% | 2   | \$512    | \$20,467  | 39.7%  | 2    | \$512 | \$20,467 | 39.7% | 2   |

|        |          |                |                                                      |      |       |          |       |     |         |           |        |      |       |          |       |     |
|--------|----------|----------------|------------------------------------------------------|------|-------|----------|-------|-----|---------|-----------|--------|------|-------|----------|-------|-----|
| 9646   | Marion   | Guin           | Waterworks & Sewer Board of Guin                     | 556  | \$195 | \$7,814  | 12.5% | 70  | \$195   | \$7,814   | 12.5%  | 70   | \$195 | \$7,814  | 12.5% | 70  |
| 9647   | Marion   | Unincorporated | OWTS                                                 | 1217 | \$530 | \$21,192 | 41.1% | 501 | \$5,000 | \$200,000 | 99.9%  | 1217 | \$100 | \$4,000  | 6.4%  | 78  |
| 9647   | Marion   | Twin           | OWTS                                                 | 53   | \$530 | \$21,194 | 23.3% | 12  | \$5,000 | \$200,000 | 99.8%  | 53   | \$100 | \$4,000  | 1.3%  | 1   |
| 9647   | Marion   | Glen Allen     | OWTS                                                 | 37   | \$530 | \$21,194 | 23.3% | 9   | \$5,000 | \$200,000 | 99.8%  | 37   | \$100 | \$4,000  | 1.3%  | 0   |
| 9647   | Marion   | Winfield       | Winfield Water Works & Sewer Board                   | 683  | \$512 | \$20,467 | 22.2% | 152 | \$512   | \$20,467  | 22.2%  | 152  | \$512 | \$20,467 | 22.2% | 152 |
| 9647   | Marion   | Brilliant      | Town of Brilliant                                    | 16   | \$213 | \$8,520  | 2.8%  | 0   | \$213   | \$8,520   | 2.8%   | 0    | \$213 | \$8,520  | 2.8%  | 0   |
| 9647   | Marion   | Guin           | Waterworks & Sewer Board of Guin                     | 32   | \$195 | \$7,814  | 2.6%  | 1   | \$195   | \$7,814   | 2.6%   | 1    | \$195 | \$7,814  | 2.6%  | 1   |
| 301    | Marshall | Unincorporated | OWTS                                                 | 52   | \$530 | \$21,192 | 28.6% | 15  | \$5,000 | \$200,000 | 100.0% | 52   | \$100 | \$4,000  | 1.7%  | 1   |
| 301    | Marshall | Guntersville   | Guntersville Water and Sewer Board                   | 1044 | \$346 | \$13,834 | 18.7% | 195 | \$346   | \$13,834  | 18.7%  | 195  | \$346 | \$13,834 | 18.7% | 195 |
| 302.01 | Marshall | Unincorporated | OWTS                                                 | 2037 | \$530 | \$21,192 | 16.7% | 339 | \$5,000 | \$200,000 | 100.0% | 2037 | \$100 | \$4,000  | 1.8%  | 37  |
| 302.01 | Marshall | Grant          | OWTS                                                 | 44   | \$530 | \$21,194 | 16.7% | 7   | \$5,000 | \$200,000 | 100.0% | 44   | \$100 | \$4,000  | 1.8%  | 1   |
| 302.02 | Marshall | Unincorporated | OWTS                                                 | 1516 | \$530 | \$21,192 | 11.4% | 173 | \$5,000 | \$200,000 | 100.0% | 1516 | \$100 | \$4,000  | 1.2%  | 19  |
| 302.02 | Marshall | Grant          | OWTS                                                 | 12   | \$530 | \$21,194 | 11.4% | 1   | \$5,000 | \$200,000 | 100.0% | 12   | \$100 | \$4,000  | 1.2%  | 0   |
| 302.02 | Marshall | Guntersville   | Guntersville Water and Sewer Board                   | 435  | \$346 | \$13,834 | 4.0%  | 18  | \$346   | \$13,834  | 4.0%   | 18   | \$346 | \$13,834 | 4.0%  | 18  |
| 303    | Marshall | Unincorporated | OWTS                                                 | 2649 | \$530 | \$21,192 | 15.3% | 406 | \$5,000 | \$200,000 | 100.0% | 2649 | \$100 | \$4,000  | 1.8%  | 48  |
| 303    | Marshall | Union Grove    | OWTS                                                 | 17   | \$530 | \$21,194 | 15.3% | 3   | \$5,000 | \$200,000 | 100.0% | 17   | \$100 | \$4,000  | 1.8%  | 0   |
| 304.01 | Marshall | Unincorporated | OWTS                                                 | 1280 | \$530 | \$21,192 | 24.3% | 311 | \$5,000 | \$200,000 | 99.9%  | 1280 | \$100 | \$4,000  | 3.4%  | 43  |
| 304.01 | Marshall | Arab           | Arab Sewer Board                                     | 524  | \$741 | \$29,654 | 33.7% | 177 | \$741   | \$29,654  | 33.7%  | 177  | \$741 | \$29,654 | 33.7% | 177 |
| 304.02 | Marshall | Unincorporated | OWTS                                                 | 928  | \$530 | \$21,192 | 11.3% | 105 | \$5,000 | \$200,000 | 100.0% | 928  | \$100 | \$4,000  | 1.1%  | 10  |
| 304.02 | Marshall | Arab           | Arab Sewer Board                                     | 309  | \$741 | \$29,654 | 19.2% | 59  | \$741   | \$29,654  | 19.2%  | 59   | \$741 | \$29,654 | 19.2% | 59  |
| 305    | Marshall | Unincorporated | OWTS                                                 | 2327 | \$530 | \$21,192 | 25.8% | 600 | \$5,000 | \$200,000 | 100.0% | 2327 | \$100 | \$4,000  | 3.8%  | 89  |
| 305    | Marshall | Arab           | Arab Sewer Board                                     | 527  | \$741 | \$29,654 | 37.0% | 195 | \$741   | \$29,654  | 37.0%  | 195  | \$741 | \$29,654 | 37.0% | 195 |
| 306    | Marshall | Unincorporated | OWTS                                                 | 1637 | \$530 | \$21,192 | 24.7% | 405 | \$5,000 | \$200,000 | 100.0% | 1637 | \$100 | \$4,000  | 4.7%  | 77  |
| 306    | Marshall | Guntersville   | Guntersville Water and Sewer Board                   | 888  | \$346 | \$13,834 | 17.5% | 156 | \$346   | \$13,834  | 17.5%  | 156  | \$346 | \$13,834 | 17.5% | 156 |
| 307.01 | Marshall | Unincorporated | OWTS                                                 | 174  | \$530 | \$21,192 | 23.4% | 41  | \$5,000 | \$200,000 | 99.9%  | 174  | \$100 | \$4,000  | 3.4%  | 6   |
| 307.01 | Marshall | Albertville    | Municipal Utilities Board of the City of Albertville | 632  | \$420 | \$16,800 | 19.7% | 125 | \$420   | \$16,800  | 19.7%  | 125  | \$420 | \$16,800 | 19.7% | 125 |
| 307.01 | Marshall | Guntersville   | Guntersville Water and Sewer Board                   | 612  | \$346 | \$13,834 | 15.9% | 98  | \$346   | \$13,834  | 15.9%  | 98   | \$346 | \$13,834 | 15.9% | 98  |
| 307.02 | Marshall | Unincorporated | OWTS                                                 | 374  | \$530 | \$21,192 | 22.8% | 85  | \$5,000 | \$200,000 | 100.0% | 374  | \$100 | \$4,000  | 3.3%  | 12  |
| 307.02 | Marshall | Albertville    | Municipal Utilities Board of the City of Albertville | 210  | \$420 | \$16,800 | 16.8% | 35  | \$420   | \$16,800  | 16.8%  | 35   | \$420 | \$16,800 | 16.8% | 35  |
| 307.02 | Marshall | Guntersville   | Guntersville Water and Sewer Board                   | 942  | \$346 | \$13,834 | 13.0% | 122 | \$346   | \$13,834  | 13.0%  | 122  | \$346 | \$13,834 | 13.0% | 122 |
| 308.01 | Marshall | Unincorporated | OWTS                                                 | 123  | \$530 | \$21,192 | 25.3% | 31  | \$5,000 | \$200,000 | 100.0% | 123  | \$100 | \$4,000  | 3.4%  | 4   |

|        |          |                |                                                                          |      |       |          |       |     |         |           |        |      |       |          |       |     |
|--------|----------|----------------|--------------------------------------------------------------------------|------|-------|----------|-------|-----|---------|-----------|--------|------|-------|----------|-------|-----|
| 308.01 | Marshall | Albertville    | Municipal Utilities Board of the City of Albertville                     | 1643 | \$420 | \$16,800 | 19.3% | 317 | \$420   | \$16,800  | 19.3%  | 317  | \$420 | \$16,800 | 19.3% | 317 |
| 308.02 | Marshall | Unincorporated | OWTS                                                                     | 547  | \$530 | \$21,192 | 22.5% | 123 | \$5,000 | \$200,000 | 100.0% | 547  | \$100 | \$4,000  | 2.5%  | 14  |
| 308.02 | Marshall | Boaz           | The Board of Water and Sewer Commissioners for the City of Boaz, Alabama | 28   | \$492 | \$19,680 | 19.6% | 5   | \$492   | \$19,680  | 19.6%  | 5    | \$492 | \$19,680 | 19.6% | 5   |
| 308.02 | Marshall | Albertville    | Municipal Utilities Board of the City of Albertville                     | 1891 | \$420 | \$16,800 | 14.2% | 269 | \$420   | \$16,800  | 14.2%  | 269  | \$420 | \$16,800 | 14.2% | 269 |
| 309.02 | Marshall | Unincorporated | OWTS                                                                     | 37   | \$530 | \$21,192 | 18.5% | 7   | \$5,000 | \$200,000 | 99.9%  | 37   | \$100 | \$4,000  | 2.2%  | 1   |
| 309.02 | Marshall | Boaz           | The Board of Water and Sewer Commissioners for the City of Boaz, Alabama | 54   | \$492 | \$19,680 | 16.7% | 9   | \$492   | \$19,680  | 16.7%  | 9    | \$492 | \$19,680 | 16.7% | 9   |
| 309.02 | Marshall | Albertville    | Municipal Utilities Board of the City of Albertville                     | 1558 | \$420 | \$16,800 | 13.4% | 209 | \$420   | \$16,800  | 13.4%  | 209  | \$420 | \$16,800 | 13.4% | 209 |
| 309.03 | Marshall | Unincorporated | OWTS                                                                     | 237  | \$530 | \$21,192 | 32.2% | 76  | \$5,000 | \$200,000 | 99.9%  | 237  | \$100 | \$4,000  | 2.3%  | 5   |
| 309.03 | Marshall | Albertville    | Municipal Utilities Board of the City of Albertville                     | 1648 | \$420 | \$16,800 | 21.4% | 353 | \$420   | \$16,800  | 21.4%  | 353  | \$420 | \$16,800 | 21.4% | 353 |
| 309.04 | Marshall | Unincorporated | OWTS                                                                     | 932  | \$530 | \$21,192 | 21.4% | 200 | \$5,000 | \$200,000 | 100.0% | 932  | \$100 | \$4,000  | 2.6%  | 25  |
| 309.04 | Marshall | Albertville    | Municipal Utilities Board of the City of Albertville                     | 1046 | \$420 | \$16,800 | 17.5% | 183 | \$420   | \$16,800  | 17.5%  | 183  | \$420 | \$16,800 | 17.5% | 183 |
| 310    | Marshall | Unincorporated | OWTS                                                                     | 1954 | \$530 | \$21,192 | 24.3% | 476 | \$5,000 | \$200,000 | 100.0% | 1954 | \$100 | \$4,000  | 4.6%  | 90  |
| 310    | Marshall | Douglas        | OWTS                                                                     | 118  | \$530 | \$21,194 | 24.3% | 29  | \$5,000 | \$200,000 | 100.0% | 118  | \$100 | \$4,000  | 4.6%  | 5   |
| 311    | Marshall | Unincorporated | OWTS                                                                     | 872  | \$530 | \$21,192 | 30.5% | 266 | \$5,000 | \$200,000 | 100.0% | 872  | \$100 | \$4,000  | 4.6%  | 40  |
| 311    | Marshall | Boaz           | The Board of Water and Sewer Commissioners for the City of Boaz, Alabama | 934  | \$492 | \$19,680 | 29.1% | 272 | \$492   | \$19,680  | 29.1%  | 272  | \$492 | \$19,680 | 29.1% | 272 |
| 312    | Marshall | Unincorporated | OWTS                                                                     | 64   | \$530 | \$21,192 | 25.5% | 16  | \$5,000 | \$200,000 | 100.0% | 64   | \$100 | \$4,000  | 4.3%  | 3   |
| 312    | Marshall | Sardis City    | Sardis City Water Works and Sewer Board                                  | 1    | \$783 | \$31,320 | 34.5% | 0   | \$783   | \$31,320  | 34.5%  | 0    | \$783 | \$31,320 | 34.5% | 0   |
| 312    | Marshall | Boaz           | The Board of Water and Sewer Commissioners for the City of Boaz, Alabama | 2026 | \$492 | \$19,680 | 23.5% | 476 | \$492   | \$19,680  | 23.5%  | 476  | \$492 | \$19,680 | 23.5% | 476 |
| 2      | Mobile   | Mobile         | Mobile Area Water & Sewer System                                         | 758  | \$750 | \$29,986 | 43.3% | 329 | \$750   | \$29,986  | 43.3%  | 329  | \$750 | \$29,986 | 43.3% | 329 |

|       |        |        |                                  |      |       |          |       |     |       |          |       |     |       |          |       |     |
|-------|--------|--------|----------------------------------|------|-------|----------|-------|-----|-------|----------|-------|-----|-------|----------|-------|-----|
| 4.01  | Mobile | Mobile | Mobile Area Water & Sewer System | 489  | \$750 | \$29,986 | 58.8% | 288 | \$750 | \$29,986 | 58.8% | 288 | \$750 | \$29,986 | 58.8% | 288 |
| 4.02  | Mobile | Mobile | Mobile Area Water & Sewer System | 454  | \$750 | \$29,986 | 82.5% | 375 | \$750 | \$29,986 | 82.5% | 375 | \$750 | \$29,986 | 82.5% | 375 |
| 5     | Mobile | Mobile | Mobile Area Water & Sewer System | 589  | \$750 | \$29,986 | 60.1% | 354 | \$750 | \$29,986 | 60.1% | 354 | \$750 | \$29,986 | 60.1% | 354 |
| 6     | Mobile | Mobile | Mobile Area Water & Sewer System | 594  | \$750 | \$29,986 | 49.1% | 292 | \$750 | \$29,986 | 49.1% | 292 | \$750 | \$29,986 | 49.1% | 292 |
| 7.01  | Mobile | Mobile | Mobile Area Water & Sewer System | 713  | \$750 | \$29,986 | 45.6% | 325 | \$750 | \$29,986 | 45.6% | 325 | \$750 | \$29,986 | 45.6% | 325 |
| 7.02  | Mobile | Mobile | Mobile Area Water & Sewer System | 907  | \$750 | \$29,986 | 50.6% | 459 | \$750 | \$29,986 | 50.6% | 459 | \$750 | \$29,986 | 50.6% | 459 |
| 8     | Mobile | Mobile | Mobile Area Water & Sewer System | 1844 | \$750 | \$29,986 | 41.8% | 771 | \$750 | \$29,986 | 41.8% | 771 | \$750 | \$29,986 | 41.8% | 771 |
| 9.01  | Mobile | Mobile | Mobile Area Water & Sewer System | 695  | \$750 | \$29,986 | 35.1% | 244 | \$750 | \$29,986 | 35.1% | 244 | \$750 | \$29,986 | 35.1% | 244 |
| 9.02  | Mobile | Mobile | Mobile Area Water & Sewer System | 969  | \$750 | \$29,986 | 24.9% | 241 | \$750 | \$29,986 | 24.9% | 241 | \$750 | \$29,986 | 24.9% | 241 |
| 9.03  | Mobile | Mobile | Mobile Area Water & Sewer System | 585  | \$750 | \$29,986 | 36.9% | 216 | \$750 | \$29,986 | 36.9% | 216 | \$750 | \$29,986 | 36.9% | 216 |
| 10.01 | Mobile | Mobile | Mobile Area Water & Sewer System | 768  | \$750 | \$29,986 | 43.2% | 332 | \$750 | \$29,986 | 43.2% | 332 | \$750 | \$29,986 | 43.2% | 332 |
| 10.02 | Mobile | Mobile | Mobile Area Water & Sewer System | 794  | \$750 | \$29,986 | 31.4% | 249 | \$750 | \$29,986 | 31.4% | 249 | \$750 | \$29,986 | 31.4% | 249 |
| 11    | Mobile | Mobile | Mobile Area Water & Sewer System | 985  | \$750 | \$29,986 | 63.7% | 628 | \$750 | \$29,986 | 63.7% | 628 | \$750 | \$29,986 | 63.7% | 628 |
| 12    | Mobile | Mobile | Mobile Area Water & Sewer System | 477  | \$750 | \$29,986 | 51.2% | 244 | \$750 | \$29,986 | 51.2% | 244 | \$750 | \$29,986 | 51.2% | 244 |
| 13.02 | Mobile | Mobile | Mobile Area Water & Sewer System | 915  | \$750 | \$29,986 | 42.4% | 388 | \$750 | \$29,986 | 42.4% | 388 | \$750 | \$29,986 | 42.4% | 388 |
| 14    | Mobile | Mobile | Mobile Area Water & Sewer System | 720  | \$750 | \$29,986 | 52.6% | 379 | \$750 | \$29,986 | 52.6% | 379 | \$750 | \$29,986 | 52.6% | 379 |
| 15.01 | Mobile | Mobile | Mobile Area Water & Sewer System | 634  | \$750 | \$29,986 | 72.6% | 461 | \$750 | \$29,986 | 72.6% | 461 | \$750 | \$29,986 | 72.6% | 461 |
| 15.02 | Mobile | Mobile | Mobile Area Water & Sewer System | 504  | \$750 | \$29,986 | 76.0% | 383 | \$750 | \$29,986 | 76.0% | 383 | \$750 | \$29,986 | 76.0% | 383 |
| 18    | Mobile | Mobile | Mobile Area Water & Sewer System | 1015 | \$750 | \$29,986 | 38.4% | 390 | \$750 | \$29,986 | 38.4% | 390 | \$750 | \$29,986 | 38.4% | 390 |
| 19.01 | Mobile | Mobile | Mobile Area Water & Sewer System | 779  | \$750 | \$29,986 | 32.3% | 252 | \$750 | \$29,986 | 32.3% | 252 | \$750 | \$29,986 | 32.3% | 252 |
| 19.02 | Mobile | Mobile | Mobile Area Water & Sewer System | 1383 | \$750 | \$29,986 | 37.2% | 514 | \$750 | \$29,986 | 37.2% | 514 | \$750 | \$29,986 | 37.2% | 514 |

|       |        |        |                                  |      |       |          |       |     |       |          |       |     |       |          |       |     |
|-------|--------|--------|----------------------------------|------|-------|----------|-------|-----|-------|----------|-------|-----|-------|----------|-------|-----|
| 20    | Mobile | Mobile | Mobile Area Water & Sewer System | 681  | \$750 | \$29,986 | 22.0% | 150 | \$750 | \$29,986 | 22.0% | 150 | \$750 | \$29,986 | 22.0% | 150 |
| 21    | Mobile | Mobile | Mobile Area Water & Sewer System | 1324 | \$750 | \$29,986 | 39.8% | 527 | \$750 | \$29,986 | 39.8% | 527 | \$750 | \$29,986 | 39.8% | 527 |
| 22    | Mobile | Mobile | Mobile Area Water & Sewer System | 859  | \$750 | \$29,986 | 44.6% | 383 | \$750 | \$29,986 | 44.6% | 383 | \$750 | \$29,986 | 44.6% | 383 |
| 23.01 | Mobile | Mobile | Mobile Area Water & Sewer System | 773  | \$750 | \$29,986 | 43.8% | 339 | \$750 | \$29,986 | 43.8% | 339 | \$750 | \$29,986 | 43.8% | 339 |
| 23.02 | Mobile | Mobile | Mobile Area Water & Sewer System | 694  | \$750 | \$29,986 | 58.4% | 405 | \$750 | \$29,986 | 58.4% | 405 | \$750 | \$29,986 | 58.4% | 405 |
| 24    | Mobile | Mobile | Mobile Area Water & Sewer System | 1265 | \$750 | \$29,986 | 50.7% | 641 | \$750 | \$29,986 | 50.7% | 641 | \$750 | \$29,986 | 50.7% | 641 |
| 25.01 | Mobile | Mobile | Mobile Area Water & Sewer System | 1570 | \$750 | \$29,986 | 22.6% | 355 | \$750 | \$29,986 | 22.6% | 355 | \$750 | \$29,986 | 22.6% | 355 |
| 25.02 | Mobile | Mobile | Mobile Area Water & Sewer System | 1115 | \$750 | \$29,986 | 20.1% | 224 | \$750 | \$29,986 | 20.1% | 224 | \$750 | \$29,986 | 20.1% | 224 |
| 26    | Mobile | Mobile | Mobile Area Water & Sewer System | 1001 | \$750 | \$29,986 | 53.1% | 531 | \$750 | \$29,986 | 53.1% | 531 | \$750 | \$29,986 | 53.1% | 531 |
| 27    | Mobile | Mobile | Mobile Area Water & Sewer System | 967  | \$750 | \$29,986 | 71.1% | 688 | \$750 | \$29,986 | 71.1% | 688 | \$750 | \$29,986 | 71.1% | 688 |
| 28    | Mobile | Mobile | Mobile Area Water & Sewer System | 2079 | \$750 | \$29,986 | 39.0% | 812 | \$750 | \$29,986 | 39.0% | 812 | \$750 | \$29,986 | 39.0% | 812 |
| 29    | Mobile | Mobile | Mobile Area Water & Sewer System | 1660 | \$750 | \$29,986 | 34.7% | 576 | \$750 | \$29,986 | 34.7% | 576 | \$750 | \$29,986 | 34.7% | 576 |
| 30    | Mobile | Mobile | Mobile Area Water & Sewer System | 1434 | \$750 | \$29,986 | 30.7% | 441 | \$750 | \$29,986 | 30.7% | 441 | \$750 | \$29,986 | 30.7% | 441 |
| 31    | Mobile | Mobile | Mobile Area Water & Sewer System | 1808 | \$750 | \$29,986 | 17.6% | 318 | \$750 | \$29,986 | 17.6% | 318 | \$750 | \$29,986 | 17.6% | 318 |
| 32.02 | Mobile | Mobile | Mobile Area Water & Sewer System | 1252 | \$750 | \$29,986 | 42.7% | 535 | \$750 | \$29,986 | 42.7% | 535 | \$750 | \$29,986 | 42.7% | 535 |
| 32.03 | Mobile | Mobile | Mobile Area Water & Sewer System | 1474 | \$750 | \$29,986 | 40.3% | 595 | \$750 | \$29,986 | 40.3% | 595 | \$750 | \$29,986 | 40.3% | 595 |
| 32.04 | Mobile | Mobile | Mobile Area Water & Sewer System | 2178 | \$750 | \$29,986 | 43.1% | 938 | \$750 | \$29,986 | 43.1% | 938 | \$750 | \$29,986 | 43.1% | 938 |
| 32.05 | Mobile | Mobile | Mobile Area Water & Sewer System | 1194 | \$750 | \$29,986 | 53.1% | 634 | \$750 | \$29,986 | 53.1% | 634 | \$750 | \$29,986 | 53.1% | 634 |
| 33.01 | Mobile | Mobile | Mobile Area Water & Sewer System | 1277 | \$750 | \$29,986 | 39.1% | 499 | \$750 | \$29,986 | 39.1% | 499 | \$750 | \$29,986 | 39.1% | 499 |
| 33.02 | Mobile | Mobile | Mobile Area Water & Sewer System | 1774 | \$750 | \$29,986 | 16.1% | 286 | \$750 | \$29,986 | 16.1% | 286 | \$750 | \$29,986 | 16.1% | 286 |
| 34.02 | Mobile | Mobile | Mobile Area Water & Sewer System | 1425 | \$750 | \$29,986 | 47.1% | 671 | \$750 | \$29,986 | 47.1% | 671 | \$750 | \$29,986 | 47.1% | 671 |



|       |        |        |                                  |      |       |          |       |     |       |          |       |     |       |          |       |     |
|-------|--------|--------|----------------------------------|------|-------|----------|-------|-----|-------|----------|-------|-----|-------|----------|-------|-----|
| 34.04 | Mobile | Mobile | Mobile Area Water & Sewer System | 1013 | \$750 | \$29,986 | 47.7% | 483 | \$750 | \$29,986 | 47.7% | 483 | \$750 | \$29,986 | 47.7% | 483 |
| 34.05 | Mobile | Mobile | Mobile Area Water & Sewer System | 739  | \$750 | \$29,986 | 20.5% | 152 | \$750 | \$29,986 | 20.5% | 152 | \$750 | \$29,986 | 20.5% | 152 |
| 34.06 | Mobile | Mobile | Mobile Area Water & Sewer System | 1148 | \$750 | \$29,986 | 35.3% | 406 | \$750 | \$29,986 | 35.3% | 406 | \$750 | \$29,986 | 35.3% | 406 |
| 34.07 | Mobile | Mobile | Mobile Area Water & Sewer System | 2686 | \$750 | \$29,986 | 31.5% | 845 | \$750 | \$29,986 | 31.5% | 845 | \$750 | \$29,986 | 31.5% | 845 |
| 34.07 | Mobile | Semmes | South Alabama Utilities-Semmes   | 152  | \$524 | \$20,966 | 18.6% | 28  | \$524 | \$20,966 | 18.6% | 28  | \$524 | \$20,966 | 18.6% | 28  |
| 34.08 | Mobile | Mobile | Mobile Area Water & Sewer System | 1390 | \$750 | \$29,986 | 32.1% | 446 | \$750 | \$29,986 | 32.1% | 446 | \$750 | \$29,986 | 32.1% | 446 |
| 35.01 | Mobile | Mobile | Mobile Area Water & Sewer System | 1406 | \$750 | \$29,986 | 26.0% | 365 | \$750 | \$29,986 | 26.0% | 365 | \$750 | \$29,986 | 26.0% | 365 |
| 35.02 | Mobile | Mobile | Mobile Area Water & Sewer System | 1077 | \$750 | \$29,986 | 8.1%  | 87  | \$750 | \$29,986 | 8.1%  | 87  | \$750 | \$29,986 | 8.1%  | 87  |
| 36.02 | Mobile | Mobile | Mobile Area Water & Sewer System | 580  | \$750 | \$29,986 | 59.6% | 346 | \$750 | \$29,986 | 59.6% | 346 | \$750 | \$29,986 | 59.6% | 346 |
| 36.06 | Mobile | Mobile | Mobile Area Water & Sewer System | 1649 | \$750 | \$29,986 | 48.3% | 797 | \$750 | \$29,986 | 48.3% | 797 | \$750 | \$29,986 | 48.3% | 797 |
| 36.07 | Mobile | Mobile | Mobile Area Water & Sewer System | 1603 | \$750 | \$29,986 | 44.2% | 709 | \$750 | \$29,986 | 44.2% | 709 | \$750 | \$29,986 | 44.2% | 709 |
| 36.08 | Mobile | Mobile | Mobile Area Water & Sewer System | 546  | \$750 | \$29,986 | 32.4% | 177 | \$750 | \$29,986 | 32.4% | 177 | \$750 | \$29,986 | 32.4% | 177 |
| 37.03 | Mobile | Mobile | Mobile Area Water & Sewer System | 1715 | \$750 | \$29,986 | 32.1% | 551 | \$750 | \$29,986 | 32.1% | 551 | \$750 | \$29,986 | 32.1% | 551 |
| 37.04 | Mobile | Mobile | Mobile Area Water & Sewer System | 2148 | \$750 | \$29,986 | 24.1% | 517 | \$750 | \$29,986 | 24.1% | 517 | \$750 | \$29,986 | 24.1% | 517 |
| 37.05 | Mobile | Mobile | Mobile Area Water & Sewer System | 1996 | \$750 | \$29,986 | 25.8% | 515 | \$750 | \$29,986 | 25.8% | 515 | \$750 | \$29,986 | 25.8% | 515 |
| 37.06 | Mobile | Mobile | Mobile Area Water & Sewer System | 1393 | \$750 | \$29,986 | 21.7% | 303 | \$750 | \$29,986 | 21.7% | 303 | \$750 | \$29,986 | 21.7% | 303 |
| 37.07 | Mobile | Mobile | Mobile Area Water & Sewer System | 2241 | \$750 | \$29,986 | 37.9% | 849 | \$750 | \$29,986 | 37.9% | 849 | \$750 | \$29,986 | 37.9% | 849 |
| 37.08 | Mobile | Mobile | Mobile Area Water & Sewer System | 1942 | \$750 | \$29,986 | 22.3% | 434 | \$750 | \$29,986 | 22.3% | 434 | \$750 | \$29,986 | 22.3% | 434 |
| 37.09 | Mobile | Mobile | Mobile Area Water & Sewer System | 2829 | \$750 | \$29,986 | 23.4% | 662 | \$750 | \$29,986 | 23.4% | 662 | \$750 | \$29,986 | 23.4% | 662 |
| 37.1  | Mobile | Mobile | Mobile Area Water & Sewer System | 1666 | \$750 | \$29,986 | 29.9% | 498 | \$750 | \$29,986 | 29.9% | 498 | \$750 | \$29,986 | 29.9% | 498 |
| 38    | Mobile | Mobile | Mobile Area Water & Sewer System | 224  | \$750 | \$29,986 | 51.4% | 115 | \$750 | \$29,986 | 51.4% | 115 | \$750 | \$29,986 | 51.4% | 115 |

|       |        |           |                                                              |      |       |          |       |     |       |          |       |     |       |          |       |     |
|-------|--------|-----------|--------------------------------------------------------------|------|-------|----------|-------|-----|-------|----------|-------|-----|-------|----------|-------|-----|
| 38    | Mobile | Creola    | Integra Water Creola, LLC                                    | 15   | \$653 | \$26,131 | 47.9% | 7   | \$653 | \$26,131 | 47.9% | 7   | \$653 | \$26,131 | 47.9% | 7   |
| 38    | Mobile | Chickasaw | Utilities Board of the City of Chickasaw                     | 159  | \$600 | \$24,000 | 44.4% | 71  | \$600 | \$24,000 | 44.4% | 71  | \$600 | \$24,000 | 44.4% | 71  |
| 38    | Mobile | Saraland  | Board of Water & Sewer Commissioners of the City of Saraland | 63   | \$390 | \$15,619 | 23.8% | 15  | \$390 | \$15,619 | 23.8% | 15  | \$390 | \$15,619 | 23.8% | 15  |
| 39.01 | Mobile | Mobile    | Mobile Area Water & Sewer System                             | 772  | \$750 | \$29,986 | 60.3% | 465 | \$750 | \$29,986 | 60.3% | 465 | \$750 | \$29,986 | 60.3% | 465 |
| 39.02 | Mobile | Mobile    | Mobile Area Water & Sewer System                             | 312  | \$750 | \$29,986 | 67.0% | 209 | \$750 | \$29,986 | 67.0% | 209 | \$750 | \$29,986 | 67.0% | 209 |
| 40    | Mobile | Prichard  | Water Works and Sewer Board of the City of Prichard          | 905  | \$568 | \$22,718 | 37.3% | 338 | \$568 | \$22,718 | 37.3% | 338 | \$568 | \$22,718 | 37.3% | 338 |
| 41    | Mobile | Mobile    | Mobile Area Water & Sewer System                             | 312  | \$750 | \$29,986 | 64.1% | 200 | \$750 | \$29,986 | 64.1% | 200 | \$750 | \$29,986 | 64.1% | 200 |
| 48    | Mobile | Chickasaw | Utilities Board of the City of Chickasaw                     | 123  | \$600 | \$24,000 | 61.8% | 76  | \$600 | \$24,000 | 61.8% | 76  | \$600 | \$24,000 | 61.8% | 76  |
| 48    | Mobile | Prichard  | Water Works and Sewer Board of the City of Prichard          | 260  | \$568 | \$22,718 | 59.1% | 154 | \$568 | \$22,718 | 59.1% | 154 | \$568 | \$22,718 | 59.1% | 154 |
| 49    | Mobile | Mobile    | Mobile Area Water & Sewer System                             | 1276 | \$750 | \$29,986 | 57.5% | 733 | \$750 | \$29,986 | 57.5% | 733 | \$750 | \$29,986 | 57.5% | 733 |
| 50    | Mobile | Chickasaw | Utilities Board of the City of Chickasaw                     | 225  | \$600 | \$24,000 | 57.6% | 130 | \$600 | \$24,000 | 57.6% | 130 | \$600 | \$24,000 | 57.6% | 130 |
| 50    | Mobile | Prichard  | Water Works and Sewer Board of the City of Prichard          | 373  | \$568 | \$22,718 | 53.4% | 199 | \$568 | \$22,718 | 53.4% | 199 | \$568 | \$22,718 | 53.4% | 199 |
| 51    | Mobile | Chickasaw | Utilities Board of the City of Chickasaw                     | 477  | \$600 | \$24,000 | 53.9% | 257 | \$600 | \$24,000 | 53.9% | 257 | \$600 | \$24,000 | 53.9% | 257 |
| 52    | Mobile | Mobile    | Mobile Area Water & Sewer System                             | 4    | \$750 | \$29,986 | 36.2% | 1   | \$750 | \$29,986 | 36.2% | 1   | \$750 | \$29,986 | 36.2% | 1   |
| 52    | Mobile | Chickasaw | Utilities Board of the City of Chickasaw                     | 515  | \$600 | \$24,000 | 29.9% | 154 | \$600 | \$24,000 | 29.9% | 154 | \$600 | \$24,000 | 29.9% | 154 |
| 53    | Mobile | Chickasaw | Utilities Board of the City of Chickasaw                     | 788  | \$600 | \$24,000 | 42.2% | 333 | \$600 | \$24,000 | 42.2% | 333 | \$600 | \$24,000 | 42.2% | 333 |
| 54    | Mobile | Chickasaw | Utilities Board of the City of Chickasaw                     | 36   | \$600 | \$24,000 | 18.2% | 7   | \$600 | \$24,000 | 18.2% | 7   | \$600 | \$24,000 | 18.2% | 7   |
| 54    | Mobile | Saraland  | Board of Water & Sewer Commissioners of the City of Saraland | 1688 | \$390 | \$15,619 | 11.3% | 191 | \$390 | \$15,619 | 11.3% | 191 | \$390 | \$15,619 | 11.3% | 191 |
| 55    | Mobile | Mobile    | Mobile Area Water & Sewer System                             | 2    | \$750 | \$29,986 | 25.1% | 1   | \$750 | \$29,986 | 25.1% | 1   | \$750 | \$29,986 | 25.1% | 1   |

|       |        |                |                                                              |      |       |          |       |     |         |           |        |      |       |          |       |     |
|-------|--------|----------------|--------------------------------------------------------------|------|-------|----------|-------|-----|---------|-----------|--------|------|-------|----------|-------|-----|
| 55    | Mobile | Saraland       | Board of Water & Sewer Commissioners of the City of Saraland | 1052 | \$390 | \$15,619 | 8.6%  | 91  | \$390   | \$15,619  | 8.6%   | 91   | \$390 | \$15,619 | 8.6%  | 91  |
| 56    | Mobile | Mobile         | Mobile Area Water & Sewer System                             | 1079 | \$750 | \$29,986 | 25.7% | 277 | \$750   | \$29,986  | 25.7%  | 277  | \$750 | \$29,986 | 25.7% | 277 |
| 56    | Mobile | Satsuma        | Satsuma Water and Sewer Board                                | 1358 | \$435 | \$17,381 | 12.7% | 172 | \$435   | \$17,381  | 12.7%  | 172  | \$435 | \$17,381 | 12.7% | 172 |
| 56    | Mobile | Saraland       | Board of Water & Sewer Commissioners of the City of Saraland | 148  | \$390 | \$15,619 | 10.5% | 16  | \$390   | \$15,619  | 10.5%  | 16   | \$390 | \$15,619 | 10.5% | 16  |
| 57    | Mobile | Creola         | Integra Water Creola, LLC                                    | 34   | \$653 | \$26,131 | 14.4% | 5   | \$653   | \$26,131  | 14.4%  | 5    | \$653 | \$26,131 | 14.4% | 5   |
| 57    | Mobile | Satsuma        | Satsuma Water and Sewer Board                                | 1191 | \$435 | \$17,381 | 10.1% | 120 | \$435   | \$17,381  | 10.1%  | 120  | \$435 | \$17,381 | 10.1% | 120 |
| 57    | Mobile | Saraland       | Board of Water & Sewer Commissioners of the City of Saraland | 1295 | \$390 | \$15,619 | 9.4%  | 122 | \$390   | \$15,619  | 9.4%   | 122  | \$390 | \$15,619 | 9.4%  | 122 |
| 58    | Mobile | Unincorporated | OWTS                                                         | 1656 | \$530 | \$21,192 | 29.4% | 486 | \$5,000 | \$200,000 | 99.9%  | 1656 | \$100 | \$4,000  | 3.2%  | 53  |
| 58    | Mobile | Mount Vernon   | OWTS                                                         | 85   | \$530 | \$21,194 | 29.4% | 25  | \$5,000 | \$200,000 | 99.9%  | 85   | \$100 | \$4,000  | 3.2%  | 3   |
| 59    | Mobile | Unincorporated | OWTS                                                         | 1671 | \$530 | \$21,192 | 11.8% | 197 | \$5,000 | \$200,000 | 99.9%  | 1671 | \$100 | \$4,000  | 1.9%  | 32  |
| 60    | Mobile | Unincorporated | OWTS                                                         | 167  | \$530 | \$21,192 | 26.9% | 45  | \$5,000 | \$200,000 | 100.0% | 167  | \$100 | \$4,000  | 5.0%  | 8   |
| 60    | Mobile | Citronelle     | South Alabama Utilities-Citronelle                           | 1635 | \$430 | \$17,184 | 21.0% | 343 | \$430   | \$17,184  | 21.0%  | 343  | \$430 | \$17,184 | 21.0% | 343 |
| 61.02 | Mobile | Mobile         | Mobile Area Water & Sewer System                             | 769  | \$750 | \$29,986 | 38.0% | 293 | \$750   | \$29,986  | 38.0%  | 293  | \$750 | \$29,986 | 38.0% | 293 |
| 61.02 | Mobile | Semmes         | South Alabama Utilities-Semmes                               | 247  | \$524 | \$20,966 | 25.2% | 62  | \$524   | \$20,966  | 25.2%  | 62   | \$524 | \$20,966 | 25.2% | 62  |
| 61.03 | Mobile | Unincorporated | OWTS                                                         | 727  | \$530 | \$21,192 | 27.7% | 201 | \$5,000 | \$200,000 | 100.0% | 727  | \$100 | \$4,000  | 2.7%  | 19  |
| 61.03 | Mobile | Mobile         | Mobile Area Water & Sewer System                             | 976  | \$750 | \$29,986 | 37.0% | 361 | \$750   | \$29,986  | 37.0%  | 361  | \$750 | \$29,986 | 37.0% | 361 |
| 61.04 | Mobile | Unincorporated | OWTS                                                         | 1356 | \$530 | \$21,192 | 20.7% | 281 | \$5,000 | \$200,000 | 100.0% | 1356 | \$100 | \$4,000  | 4.7%  | 63  |
| 61.04 | Mobile | Semmes         | South Alabama Utilities-Semmes                               | 196  | \$524 | \$20,966 | 20.5% | 40  | \$524   | \$20,966  | 20.5%  | 40   | \$524 | \$20,966 | 20.5% | 40  |
| 61.04 | Mobile | Saraland       | Board of Water & Sewer Commissioners of the City of Saraland | 33   | \$390 | \$15,619 | 15.0% | 5   | \$390   | \$15,619  | 15.0%  | 5    | \$390 | \$15,619 | 15.0% | 5   |
| 61.05 | Mobile | Unincorporated | OWTS                                                         | 686  | \$530 | \$21,192 | 17.3% | 119 | \$5,000 | \$200,000 | 100.0% | 686  | \$100 | \$4,000  | 1.2%  | 8   |
| 61.05 | Mobile | Semmes         | South Alabama Utilities-Semmes                               | 485  | \$524 | \$20,966 | 16.9% | 82  | \$524   | \$20,966  | 16.9%  | 82   | \$524 | \$20,966 | 16.9% | 82  |
| 61.05 | Mobile | Saraland       | Board of Water & Sewer Commissioners of the City of Saraland | 1095 | \$390 | \$15,619 | 8.7%  | 95  | \$390   | \$15,619  | 8.7%   | 95   | \$390 | \$15,619 | 8.7%  | 95  |
| 62    | Mobile | Unincorporated | OWTS                                                         | 1602 | \$530 | \$21,192 | 14.8% | 236 | \$5,000 | \$200,000 | 99.8%  | 1602 | \$100 | \$4,000  | 2.1%  | 33  |

|       |        |                |                                                           |      |       |          |       |     |         |           |        |      |       |          |       |     |
|-------|--------|----------------|-----------------------------------------------------------|------|-------|----------|-------|-----|---------|-----------|--------|------|-------|----------|-------|-----|
| 63.01 | Mobile | Unincorporated | OWTS                                                      | 3386 | \$530 | \$21,192 | 21.1% | 715 | \$5,000 | \$200,000 | 100.0% | 3386 | \$100 | \$4,000  | 2.9%  | 98  |
| 63.01 | Mobile | Semmes         | South Alabama Utilities-Semmes                            | 151  | \$524 | \$20,966 | 20.9% | 32  | \$524   | \$20,966  | 20.9%  | 32   | \$524 | \$20,966 | 20.9% | 32  |
| 63.02 | Mobile | Unincorporated | OWTS                                                      | 2287 | \$530 | \$21,192 | 14.3% | 327 | \$5,000 | \$200,000 | 100.0% | 2287 | \$100 | \$4,000  | 3.5%  | 80  |
| 63.02 | Mobile | Semmes         | South Alabama Utilities-Semmes                            | 706  | \$524 | \$20,966 | 14.2% | 100 | \$524   | \$20,966  | 14.2%  | 100  | \$524 | \$20,966 | 14.2% | 100 |
| 64.02 | Mobile | Mobile         | Mobile Area Water & Sewer System                          | 1576 | \$750 | \$29,986 | 32.1% | 506 | \$750   | \$29,986  | 32.1%  | 506  | \$750 | \$29,986 | 32.1% | 506 |
| 64.03 | Mobile | Mobile         | Mobile Area Water & Sewer System                          | 595  | \$750 | \$29,986 | 30.8% | 183 | \$750   | \$29,986  | 30.8%  | 183  | \$750 | \$29,986 | 30.8% | 183 |
| 64.04 | Mobile | Mobile         | Mobile Area Water & Sewer System                          | 4009 | \$750 | \$29,986 | 21.8% | 874 | \$750   | \$29,986  | 21.8%  | 874  | \$750 | \$29,986 | 21.8% | 874 |
| 64.05 | Mobile | Mobile         | Mobile Area Water & Sewer System                          | 3297 | \$750 | \$29,986 | 25.7% | 847 | \$750   | \$29,986  | 25.7%  | 847  | \$750 | \$29,986 | 25.7% | 847 |
| 64.06 | Mobile | Unincorporated | OWTS                                                      | 3017 | \$530 | \$21,192 | 7.2%  | 219 | \$5,000 | \$200,000 | 100.0% | 3017 | \$100 | \$4,000  | 0.8%  | 23  |
| 64.07 | Mobile | Unincorporated | OWTS                                                      | 1988 | \$530 | \$21,192 | 11.1% | 221 | \$5,000 | \$200,000 | 100.0% | 1988 | \$100 | \$4,000  | 3.2%  | 64  |
| 65.01 | Mobile | Unincorporated | Mobile County Water, Sewer, and Fire Protection Authority | 1782 | \$750 | \$29,986 | 25.1% | 448 | \$750   | \$29,986  | 25.1%  | 448  | \$750 | \$29,986 | 25.1% | 448 |
| 65.02 | Mobile | Unincorporated | OWTS                                                      | 4285 | \$530 | \$21,192 | 10.1% | 434 | \$5,000 | \$200,000 | 99.9%  | 4285 | \$100 | \$4,000  | 1.9%  | 81  |
| 66    | Mobile | Unincorporated | Mobile County Water, Sewer, and Fire Protection Authority | 1779 | \$750 | \$29,986 | 21.7% | 386 | \$750   | \$29,986  | 21.7%  | 386  | \$750 | \$29,986 | 21.7% | 386 |
| 66    | Mobile | Bayou La Batre | Utilities Board of the City of Bayou La Batre             | 2    | \$337 | \$13,464 | 10.0% | 0   | \$337   | \$13,464  | 10.0%  | 0    | \$337 | \$13,464 | 10.0% | 0   |
| 67.01 | Mobile | Unincorporated | Mobile County Water, Sewer, and Fire Protection Authority | 2182 | \$750 | \$29,986 | 32.0% | 698 | \$750   | \$29,986  | 32.0%  | 698  | \$750 | \$29,986 | 32.0% | 698 |
| 67.01 | Mobile | Bayou La Batre | Utilities Board of the City of Bayou La Batre             | 25   | \$337 | \$13,464 | 12.2% | 3   | \$337   | \$13,464  | 12.2%  | 3    | \$337 | \$13,464 | 12.2% | 3   |
| 67.02 | Mobile | Unincorporated | Mobile County Water, Sewer, and Fire Protection Authority | 1359 | \$750 | \$29,986 | 37.5% | 509 | \$750   | \$29,986  | 37.5%  | 509  | \$750 | \$29,986 | 37.5% | 509 |
| 68.01 | Mobile | Mobile         | Mobile Area Water & Sewer System                          | 2819 | \$750 | \$29,986 | 10.1% | 284 | \$750   | \$29,986  | 10.1%  | 284  | \$750 | \$29,986 | 10.1% | 284 |
| 68.02 | Mobile | Mobile         | Mobile Area Water & Sewer System                          | 1018 | \$750 | \$29,986 | 36.8% | 374 | \$750   | \$29,986  | 36.8%  | 374  | \$750 | \$29,986 | 36.8% | 374 |
| 69.01 | Mobile | Unincorporated | OWTS                                                      | 2903 | \$530 | \$21,192 | 29.4% | 855 | \$5,000 | \$200,000 | 100.0% | 2903 | \$100 | \$4,000  | 3.5%  | 101 |
| 69.02 | Mobile | Mobile         | Mobile Area Water & Sewer System                          | 1470 | \$750 | \$29,986 | 34.7% | 510 | \$750   | \$29,986  | 34.7%  | 510  | \$750 | \$29,986 | 34.7% | 510 |
| 70    | Mobile | Mobile         | Mobile Area Water & Sewer System                          | 1867 | \$750 | \$29,986 | 25.7% | 481 | \$750   | \$29,986  | 25.7%  | 481  | \$750 | \$29,986 | 25.7% | 481 |

|       |        |                |                                                            |      |       |          |       |     |         |           |        |      |       |          |       |     |
|-------|--------|----------------|------------------------------------------------------------|------|-------|----------|-------|-----|---------|-----------|--------|------|-------|----------|-------|-----|
| 71.01 | Mobile | Mobile         | Mobile Area Water & Sewer System                           | 1599 | \$750 | \$29,986 | 26.2% | 419 | \$750   | \$29,986  | 26.2%  | 419  | \$750 | \$29,986 | 26.2% | 419 |
| 71.02 | Mobile | Mobile         | Mobile Area Water & Sewer System                           | 987  | \$750 | \$29,986 | 38.1% | 376 | \$750   | \$29,986  | 38.1%  | 376  | \$750 | \$29,986 | 38.1% | 376 |
| 71.03 | Mobile | Mobile         | Mobile Area Water & Sewer System                           | 1291 | \$750 | \$29,986 | 26.8% | 346 | \$750   | \$29,986  | 26.8%  | 346  | \$750 | \$29,986 | 26.8% | 346 |
| 72.01 | Mobile | Unincorporated | Mobile County Water, Sewer, and Fire Protection Authority  | 1016 | \$750 | \$29,986 | 43.5% | 442 | \$750   | \$29,986  | 43.5%  | 442  | \$750 | \$29,986 | 43.5% | 442 |
| 72.02 | Mobile | Dauphin Island | Dauphin Island Water and Sewer Authority                   | 1109 | \$497 | \$19,872 | 11.8% | 131 | \$497   | \$19,872  | 11.8%  | 131  | \$497 | \$19,872 | 11.8% | 131 |
| 73    | Mobile | Unincorporated | Mobile County Water, Sewer, and Fire Protection Authority  | 541  | \$750 | \$29,986 | 33.9% | 183 | \$750   | \$29,986  | 33.9%  | 183  | \$750 | \$29,986 | 33.9% | 183 |
| 73    | Mobile | Bayou La Batre | Utilities Board of the City of Bayou La Batre              | 875  | \$337 | \$13,464 | 12.6% | 111 | \$337   | \$13,464  | 12.6%  | 111  | \$337 | \$13,464 | 12.6% | 111 |
| 74    | Mobile | Mobile         | Mobile Area Water & Sewer System                           | 1263 | \$750 | \$29,986 | 30.8% | 389 | \$750   | \$29,986  | 30.8%  | 389  | \$750 | \$29,986 | 30.8% | 389 |
| 75    | Mobile | Prichard       | Water Works and Sewer Board of the City of Prichard        | 536  | \$568 | \$22,718 | 28.9% | 155 | \$568   | \$22,718  | 28.9%  | 155  | \$568 | \$22,718 | 28.9% | 155 |
| 76    | Mobile | Mobile         | Mobile Area Water & Sewer System                           | 644  | \$750 | \$29,986 | 49.1% | 316 | \$750   | \$29,986  | 49.1%  | 316  | \$750 | \$29,986 | 49.1% | 316 |
| 76    | Mobile | Chickasaw      | Utilities Board of the City of Chickasaw                   | 22   | \$600 | \$24,000 | 41.1% | 9   | \$600   | \$24,000  | 41.1%  | 9    | \$600 | \$24,000 | 41.1% | 9   |
| 77    | Mobile | Mobile         | Mobile Area Water & Sewer System                           | 499  | \$750 | \$29,986 | 62.7% | 313 | \$750   | \$29,986  | 62.7%  | 313  | \$750 | \$29,986 | 62.7% | 313 |
| 756   | Monroe | Unincorporated | OWTS                                                       | 485  | \$530 | \$21,192 | 46.9% | 228 | \$5,000 | \$200,000 | 99.9%  | 485  | \$100 | \$4,000  | 9.8%  | 47  |
| 756   | Monroe | Beatrice       | OWTS                                                       | 3    | \$530 | \$21,194 | 46.9% | 2   | \$5,000 | \$200,000 | 99.9%  | 3    | \$100 | \$4,000  | 9.8%  | 0   |
| 757   | Monroe | Unincorporated | OWTS                                                       | 643  | \$530 | \$21,192 | 43.5% | 280 | \$5,000 | \$200,000 | 99.9%  | 643  | \$100 | \$4,000  | 10.4% | 67  |
| 757   | Monroe | Vredenburgh    | OWTS                                                       | 4    | \$530 | \$21,194 | 43.5% | 2   | \$5,000 | \$200,000 | 99.9%  | 4    | \$100 | \$4,000  | 10.4% | 0   |
| 758   | Monroe | Unincorporated | OWTS                                                       | 572  | \$530 | \$21,192 | 55.2% | 316 | \$5,000 | \$200,000 | 99.9%  | 572  | \$100 | \$4,000  | 14.7% | 84  |
| 759   | Monroe | Unincorporated | OWTS                                                       | 636  | \$530 | \$21,192 | 30.7% | 195 | \$5,000 | \$200,000 | 100.0% | 636  | \$100 | \$4,000  | 6.6%  | 42  |
| 759   | Monroe | Monroeville    | The Water Works and Sewer Board of the City of Monroeville | 1510 | \$353 | \$14,136 | 20.9% | 315 | \$353   | \$14,136  | 20.9%  | 315  | \$353 | \$14,136 | 20.9% | 315 |
| 760   | Monroe | Unincorporated | OWTS                                                       | 34   | \$530 | \$21,192 | 34.8% | 12  | \$5,000 | \$200,000 | 100.0% | 34   | \$100 | \$4,000  | 8.6%  | 3   |
| 760   | Monroe | Monroeville    | The Water Works and Sewer Board of the City of Monroeville | 1113 | \$353 | \$14,136 | 29.8% | 332 | \$353   | \$14,136  | 29.8%  | 332  | \$353 | \$14,136 | 29.8% | 332 |
| 761   | Monroe | Unincorporated | OWTS                                                       | 2231 | \$530 | \$21,192 | 40.6% | 905 | \$5,000 | \$200,000 | 100.0% | 2231 | \$100 | \$4,000  | 8.4%  | 187 |
| 761   | Monroe | Excel          | Excel                                                      | 90   | \$494 | \$19,762 | 38.3% | 35  | \$494   | \$19,762  | 38.3%  | 35   | \$494 | \$19,762 | 38.3% | 35  |

|     |            |                |                                                                  |      |         |          |       |     |          |           |        |     |       |          |       |     |
|-----|------------|----------------|------------------------------------------------------------------|------|---------|----------|-------|-----|----------|-----------|--------|-----|-------|----------|-------|-----|
| 761 | Monroe     | Frisco City    | The Water Works and Sewer Board of the City of Monroeville       | 241  | \$353   | \$14,136 | 29.2% | 70  | \$353    | \$14,136  | 29.2%  | 70  | \$353 | \$14,136 | 29.2% | 70  |
| 762 | Monroe     | Unincorporated | OWTS                                                             | 604  | \$530   | \$21,192 | 38.3% | 231 | \$5,000  | \$200,000 | 100.0% | 604 | \$100 | \$4,000  | 6.7%  | 40  |
| 1   | Montgomery | Montgomery     | The Water Works & Sanitary Sewer Board of the City of Montgomery | 258  | \$373   | \$14,938 | 36.6% | 95  | \$373    | \$14,938  | 36.6%  | 95  | \$373 | \$14,938 | 36.6% | 95  |
| 2   | Montgomery | Montgomery     | The Water Works & Sanitary Sewer Board of the City of Montgomery | 316  | \$373   | \$14,938 | 26.0% | 82  | \$373    | \$14,938  | 26.0%  | 82  | \$373 | \$14,938 | 26.0% | 82  |
| 3   | Montgomery | Unincorporated | OWTS                                                             | 218  | \$1,819 | \$72,778 | 95.0% | 207 | \$20,000 | \$800,000 | 100.0% | 218 | \$100 | \$4,000  | 5.8%  | 13  |
| 3   | Montgomery | Montgomery     | The Water Works & Sanitary Sewer Board of the City of Montgomery | 268  | \$373   | \$14,938 | 26.8% | 72  | \$373    | \$14,938  | 26.8%  | 72  | \$373 | \$14,938 | 26.8% | 72  |
| 4   | Montgomery | Montgomery     | The Water Works & Sanitary Sewer Board of the City of Montgomery | 1474 | \$373   | \$14,938 | 34.5% | 508 | \$373    | \$14,938  | 34.5%  | 508 | \$373 | \$14,938 | 34.5% | 508 |
| 5   | Montgomery | Montgomery     | The Water Works & Sanitary Sewer Board of the City of Montgomery | 1198 | \$373   | \$14,938 | 11.4% | 136 | \$373    | \$14,938  | 11.4%  | 136 | \$373 | \$14,938 | 11.4% | 136 |
| 6   | Montgomery | Montgomery     | The Water Works & Sanitary Sewer Board of the City of Montgomery | 591  | \$373   | \$14,938 | 43.0% | 254 | \$373    | \$14,938  | 43.0%  | 254 | \$373 | \$14,938 | 43.0% | 254 |
| 7   | Montgomery | Montgomery     | The Water Works & Sanitary Sewer Board of the City of Montgomery | 538  | \$373   | \$14,938 | 25.5% | 137 | \$373    | \$14,938  | 25.5%  | 137 | \$373 | \$14,938 | 25.5% | 137 |
| 9   | Montgomery | Unincorporated | OWTS                                                             | 227  | \$1,819 | \$72,778 | 33.7% | 77  | \$20,000 | \$800,000 | 100.0% | 227 | \$100 | \$4,000  | 0.0%  | 0   |
| 9   | Montgomery | Montgomery     | The Water Works & Sanitary Sewer Board of the City of Montgomery | 58   | \$373   | \$14,938 | 0.0%  | 0   | \$373    | \$14,938  | 0.0%   | 0   | \$373 | \$14,938 | 0.0%  | 0   |
| 10  | Montgomery | Montgomery     | The Water Works & Sanitary Sewer Board of the City of Montgomery | 553  | \$373   | \$14,938 | 52.0% | 288 | \$373    | \$14,938  | 52.0%  | 288 | \$373 | \$14,938 | 52.0% | 288 |
| 11  | Montgomery | Montgomery     | The Water Works & Sanitary Sewer Board of the City of Montgomery | 1241 | \$373   | \$14,938 | 48.5% | 602 | \$373    | \$14,938  | 48.5%  | 602 | \$373 | \$14,938 | 48.5% | 602 |
| 12  | Montgomery | Montgomery     | The Water Works & Sanitary Sewer Board of the City of Montgomery | 668  | \$373   | \$14,938 | 46.9% | 313 | \$373    | \$14,938  | 46.9%  | 313 | \$373 | \$14,938 | 46.9% | 313 |
| 13  | Montgomery | Montgomery     | The Water Works & Sanitary Sewer Board of the City of Montgomery | 938  | \$373   | \$14,938 | 15.5% | 145 | \$373    | \$14,938  | 15.5%  | 145 | \$373 | \$14,938 | 15.5% | 145 |

|       |            |            |                                                                  |      |       |          |       |     |       |          |       |     |       |          |       |     |
|-------|------------|------------|------------------------------------------------------------------|------|-------|----------|-------|-----|-------|----------|-------|-----|-------|----------|-------|-----|
| 14    | Montgomery | Montgomery | The Water Works & Sanitary Sewer Board of the City of Montgomery | 1512 | \$373 | \$14,938 | 12.5% | 189 | \$373 | \$14,938 | 12.5% | 189 | \$373 | \$14,938 | 12.5% | 189 |
| 15    | Montgomery | Montgomery | The Water Works & Sanitary Sewer Board of the City of Montgomery | 812  | \$373 | \$14,938 | 37.9% | 308 | \$373 | \$14,938 | 37.9% | 308 | \$373 | \$14,938 | 37.9% | 308 |
| 16    | Montgomery | Montgomery | The Water Works & Sanitary Sewer Board of the City of Montgomery | 1458 | \$373 | \$14,938 | 27.5% | 401 | \$373 | \$14,938 | 27.5% | 401 | \$373 | \$14,938 | 27.5% | 401 |
| 17    | Montgomery | Montgomery | The Water Works & Sanitary Sewer Board of the City of Montgomery | 2177 | \$373 | \$14,938 | 10.1% | 221 | \$373 | \$14,938 | 10.1% | 221 | \$373 | \$14,938 | 10.1% | 221 |
| 18    | Montgomery | Montgomery | The Water Works & Sanitary Sewer Board of the City of Montgomery | 1410 | \$373 | \$14,938 | 6.2%  | 87  | \$373 | \$14,938 | 6.2%  | 87  | \$373 | \$14,938 | 6.2%  | 87  |
| 19    | Montgomery | Montgomery | The Water Works & Sanitary Sewer Board of the City of Montgomery | 1438 | \$373 | \$14,938 | 6.3%  | 91  | \$373 | \$14,938 | 6.3%  | 91  | \$373 | \$14,938 | 6.3%  | 91  |
| 20    | Montgomery | Montgomery | The Water Works & Sanitary Sewer Board of the City of Montgomery | 1676 | \$373 | \$14,938 | 9.0%  | 152 | \$373 | \$14,938 | 9.0%  | 152 | \$373 | \$14,938 | 9.0%  | 152 |
| 21    | Montgomery | Montgomery | The Water Works & Sanitary Sewer Board of the City of Montgomery | 1376 | \$373 | \$14,938 | 13.6% | 188 | \$373 | \$14,938 | 13.6% | 188 | \$373 | \$14,938 | 13.6% | 188 |
| 22.01 | Montgomery | Montgomery | The Water Works & Sanitary Sewer Board of the City of Montgomery | 1376 | \$373 | \$14,938 | 25.9% | 356 | \$373 | \$14,938 | 25.9% | 356 | \$373 | \$14,938 | 25.9% | 356 |
| 22.02 | Montgomery | Montgomery | The Water Works & Sanitary Sewer Board of the City of Montgomery | 348  | \$373 | \$14,938 | 26.3% | 92  | \$373 | \$14,938 | 26.3% | 92  | \$373 | \$14,938 | 26.3% | 92  |
| 23    | Montgomery | Montgomery | The Water Works & Sanitary Sewer Board of the City of Montgomery | 1066 | \$373 | \$14,938 | 35.5% | 378 | \$373 | \$14,938 | 35.5% | 378 | \$373 | \$14,938 | 35.5% | 378 |
| 24    | Montgomery | Montgomery | The Water Works & Sanitary Sewer Board of the City of Montgomery | 704  | \$373 | \$14,938 | 33.2% | 234 | \$373 | \$14,938 | 33.2% | 234 | \$373 | \$14,938 | 33.2% | 234 |
| 25    | Montgomery | Montgomery | The Water Works & Sanitary Sewer Board of the City of Montgomery | 862  | \$373 | \$14,938 | 14.9% | 128 | \$373 | \$14,938 | 14.9% | 128 | \$373 | \$14,938 | 14.9% | 128 |
| 26    | Montgomery | Montgomery | The Water Works & Sanitary Sewer Board of the City of Montgomery | 2341 | \$373 | \$14,938 | 10.8% | 254 | \$373 | \$14,938 | 10.8% | 254 | \$373 | \$14,938 | 10.8% | 254 |

|       |            |                |                                                                  |      |         |          |       |     |          |           |        |      |       |          |       |     |
|-------|------------|----------------|------------------------------------------------------------------|------|---------|----------|-------|-----|----------|-----------|--------|------|-------|----------|-------|-----|
| 27    | Montgomery | Montgomery     | The Water Works & Sanitary Sewer Board of the City of Montgomery | 1821 | \$373   | \$14,938 | 4.2%  | 76  | \$373    | \$14,938  | 4.2%   | 76   | \$373 | \$14,938 | 4.2%  | 76  |
| 28    | Montgomery | Montgomery     | The Water Works & Sanitary Sewer Board of the City of Montgomery | 2151 | \$373   | \$14,938 | 14.4% | 310 | \$373    | \$14,938  | 14.4%  | 310  | \$373 | \$14,938 | 14.4% | 310 |
| 29    | Montgomery | Montgomery     | The Water Works & Sanitary Sewer Board of the City of Montgomery | 2940 | \$373   | \$14,938 | 23.2% | 682 | \$373    | \$14,938  | 23.2%  | 682  | \$373 | \$14,938 | 23.2% | 682 |
| 30    | Montgomery | Montgomery     | The Water Works & Sanitary Sewer Board of the City of Montgomery | 922  | \$373   | \$14,938 | 30.2% | 278 | \$373    | \$14,938  | 30.2%  | 278  | \$373 | \$14,938 | 30.2% | 278 |
| 31    | Montgomery | Montgomery     | The Water Works & Sanitary Sewer Board of the City of Montgomery | 1398 | \$373   | \$14,938 | 14.1% | 197 | \$373    | \$14,938  | 14.1%  | 197  | \$373 | \$14,938 | 14.1% | 197 |
| 32    | Montgomery | Montgomery     | The Water Works & Sanitary Sewer Board of the City of Montgomery | 2334 | \$373   | \$14,938 | 13.8% | 323 | \$373    | \$14,938  | 13.8%  | 323  | \$373 | \$14,938 | 13.8% | 323 |
| 33.01 | Montgomery | Montgomery     | The Water Works & Sanitary Sewer Board of the City of Montgomery | 1511 | \$373   | \$14,938 | 5.2%  | 78  | \$373    | \$14,938  | 5.2%   | 78   | \$373 | \$14,938 | 5.2%  | 78  |
| 33.02 | Montgomery | Montgomery     | The Water Works & Sanitary Sewer Board of the City of Montgomery | 2788 | \$373   | \$14,938 | 7.7%  | 214 | \$373    | \$14,938  | 7.7%   | 214  | \$373 | \$14,938 | 7.7%  | 214 |
| 51.01 | Montgomery | Unincorporated | OWTS                                                             | 1025 | \$1,819 | \$72,778 | 63.9% | 655 | \$20,000 | \$800,000 | 100.0% | 1025 | \$100 | \$4,000  | 3.4%  | 35  |
| 51.01 | Montgomery | Montgomery     | The Water Works & Sanitary Sewer Board of the City of Montgomery | 224  | \$373   | \$14,938 | 9.5%  | 21  | \$373    | \$14,938  | 9.5%   | 21   | \$373 | \$14,938 | 9.5%  | 21  |
| 51.02 | Montgomery | Unincorporated | OWTS                                                             | 614  | \$1,819 | \$72,778 | 84.7% | 520 | \$20,000 | \$800,000 | 100.0% | 614  | \$100 | \$4,000  | 4.8%  | 30  |
| 51.02 | Montgomery | Montgomery     | The Water Works & Sanitary Sewer Board of the City of Montgomery | 1112 | \$373   | \$14,938 | 20.8% | 231 | \$373    | \$14,938  | 20.8%  | 231  | \$373 | \$14,938 | 20.8% | 231 |
| 53.01 | Montgomery | Unincorporated | OWTS                                                             | 295  | \$1,819 | \$72,778 | 55.1% | 163 | \$20,000 | \$800,000 | 99.9%  | 295  | \$100 | \$4,000  | 0.0%  | 0   |
| 53.02 | Montgomery | Montgomery     | The Water Works & Sanitary Sewer Board of the City of Montgomery | 734  | \$373   | \$14,938 | 11.7% | 86  | \$373    | \$14,938  | 11.7%  | 86   | \$373 | \$14,938 | 11.7% | 86  |
| 54.02 | Montgomery | Montgomery     | The Water Works & Sanitary Sewer Board of the City of Montgomery | 2570 | \$373   | \$14,938 | 14.1% | 363 | \$373    | \$14,938  | 14.1%  | 363  | \$373 | \$14,938 | 14.1% | 363 |
| 54.03 | Montgomery | Montgomery     | The Water Works & Sanitary Sewer Board of the City of Montgomery | 1991 | \$373   | \$14,938 | 9.8%  | 195 | \$373    | \$14,938  | 9.8%   | 195  | \$373 | \$14,938 | 9.8%  | 195 |



|       |            |                |                                                                  |      |         |          |       |     |          |           |        |      |       |          |       |     |
|-------|------------|----------------|------------------------------------------------------------------|------|---------|----------|-------|-----|----------|-----------|--------|------|-------|----------|-------|-----|
| 54.06 | Montgomery | Montgomery     | The Water Works & Sanitary Sewer Board of the City of Montgomery | 4014 | \$373   | \$14,938 | 4.8%  | 192 | \$373    | \$14,938  | 4.8%   | 192  | \$373 | \$14,938 | 4.8%  | 192 |
| 54.07 | Montgomery | Montgomery     | The Water Works & Sanitary Sewer Board of the City of Montgomery | 1976 | \$373   | \$14,938 | 7.1%  | 140 | \$373    | \$14,938  | 7.1%   | 140  | \$373 | \$14,938 | 7.1%  | 140 |
| 54.08 | Montgomery | Unincorporated | OWTS                                                             | 939  | \$1,819 | \$72,778 | 46.2% | 434 | \$20,000 | \$800,000 | 100.0% | 939  | \$100 | \$4,000  | 0.4%  | 4   |
| 54.08 | Montgomery | Montgomery     | The Water Works & Sanitary Sewer Board of the City of Montgomery | 2249 | \$373   | \$14,938 | 1.7%  | 38  | \$373    | \$14,938  | 1.7%   | 38   | \$373 | \$14,938 | 1.7%  | 38  |
| 54.09 | Montgomery | Montgomery     | The Water Works & Sanitary Sewer Board of the City of Montgomery | 1182 | \$373   | \$14,938 | 9.0%  | 107 | \$373    | \$14,938  | 9.0%   | 107  | \$373 | \$14,938 | 9.0%  | 107 |
| 54.1  | Montgomery | Montgomery     | The Water Works & Sanitary Sewer Board of the City of Montgomery | 2391 | \$373   | \$14,938 | 25.4% | 606 | \$373    | \$14,938  | 25.4%  | 606  | \$373 | \$14,938 | 25.4% | 606 |
| 55.01 | Montgomery | Unincorporated | OWTS                                                             | 470  | \$1,819 | \$72,778 | 55.1% | 259 | \$20,000 | \$800,000 | 100.0% | 470  | \$100 | \$4,000  | 0.8%  | 4   |
| 55.01 | Montgomery | Montgomery     | The Water Works & Sanitary Sewer Board of the City of Montgomery | 144  | \$373   | \$14,938 | 8.4%  | 12  | \$373    | \$14,938  | 8.4%   | 12   | \$373 | \$14,938 | 8.4%  | 12  |
| 55.01 | Montgomery | Pike Road      | The Water Works & Sanitary Sewer Board of the City of Montgomery | 21   | \$373   | \$14,938 | 8.4%  | 2   | \$373    | \$14,938  | 8.4%   | 2    | \$373 | \$14,938 | 8.4%  | 2   |
| 55.02 | Montgomery | Unincorporated | OWTS                                                             | 855  | \$1,819 | \$72,778 | 51.7% | 442 | \$20,000 | \$800,000 | 100.0% | 855  | \$100 | \$4,000  | 2.0%  | 17  |
| 55.02 | Montgomery | Pike Road      | The Water Works & Sanitary Sewer Board of the City of Montgomery | 248  | \$373   | \$14,938 | 7.6%  | 19  | \$373    | \$14,938  | 7.6%   | 19   | \$373 | \$14,938 | 7.6%  | 19  |
| 55.02 | Montgomery | Montgomery     | The Water Works & Sanitary Sewer Board of the City of Montgomery | 119  | \$373   | \$14,938 | 7.6%  | 9   | \$373    | \$14,938  | 7.6%   | 9    | \$373 | \$14,938 | 7.6%  | 9   |
| 55.03 | Montgomery | Unincorporated | OWTS                                                             | 1550 | \$1,819 | \$72,778 | 33.1% | 513 | \$20,000 | \$800,000 | 100.0% | 1550 | \$100 | \$4,000  | 0.4%  | 7   |
| 55.03 | Montgomery | Montgomery     | The Water Works & Sanitary Sewer Board of the City of Montgomery | 354  | \$373   | \$14,938 | 2.0%  | 7   | \$373    | \$14,938  | 2.0%   | 7    | \$373 | \$14,938 | 2.0%  | 7   |
| 55.03 | Montgomery | Pike Road      | The Water Works & Sanitary Sewer Board of the City of Montgomery | 148  | \$373   | \$14,938 | 2.0%  | 3   | \$373    | \$14,938  | 2.0%   | 3    | \$373 | \$14,938 | 2.0%  | 3   |
| 55.04 | Montgomery | Unincorporated | OWTS                                                             | 269  | \$1,819 | \$72,778 | 24.7% | 66  | \$20,000 | \$800,000 | 100.0% | 269  | \$100 | \$4,000  | 1.4%  | 4   |
| 55.04 | Montgomery | Pike Road      | The Water Works & Sanitary Sewer Board of the City of Montgomery | 216  | \$373   | \$14,938 | 3.5%  | 8   | \$373    | \$14,938  | 3.5%   | 8    | \$373 | \$14,938 | 3.5%  | 8   |

|       |            |                |                                                                  |      |         |          |       |     |          |           |        |      |       |          |       |     |
|-------|------------|----------------|------------------------------------------------------------------|------|---------|----------|-------|-----|----------|-----------|--------|------|-------|----------|-------|-----|
| 56.03 | Montgomery | Montgomery     | The Water Works & Sanitary Sewer Board of the City of Montgomery | 2384 | \$373   | \$14,938 | 24.5% | 583 | \$373    | \$14,938  | 24.5%  | 583  | \$373 | \$14,938 | 24.5% | 583 |
| 56.04 | Montgomery | Pike Road      | The Water Works & Sanitary Sewer Board of the City of Montgomery | 720  | \$373   | \$14,938 | 3.9%  | 28  | \$373    | \$14,938  | 3.9%   | 28   | \$373 | \$14,938 | 3.9%  | 28  |
| 56.04 | Montgomery | Montgomery     | The Water Works & Sanitary Sewer Board of the City of Montgomery | 691  | \$373   | \$14,938 | 3.9%  | 27  | \$373    | \$14,938  | 3.9%   | 27   | \$373 | \$14,938 | 3.9%  | 27  |
| 56.05 | Montgomery | Montgomery     | The Water Works & Sanitary Sewer Board of the City of Montgomery | 1438 | \$373   | \$14,938 | 1.6%  | 23  | \$373    | \$14,938  | 1.6%   | 23   | \$373 | \$14,938 | 1.6%  | 23  |
| 56.06 | Montgomery | Montgomery     | The Water Works & Sanitary Sewer Board of the City of Montgomery | 1727 | \$373   | \$14,938 | 20.0% | 346 | \$373    | \$14,938  | 20.0%  | 346  | \$373 | \$14,938 | 20.0% | 346 |
| 56.07 | Montgomery | Montgomery     | The Water Works & Sanitary Sewer Board of the City of Montgomery | 1761 | \$373   | \$14,938 | 3.9%  | 69  | \$373    | \$14,938  | 3.9%   | 69   | \$373 | \$14,938 | 3.9%  | 69  |
| 56.08 | Montgomery | Montgomery     | The Water Works & Sanitary Sewer Board of the City of Montgomery | 350  | \$373   | \$14,938 | 2.4%  | 8   | \$373    | \$14,938  | 2.4%   | 8    | \$373 | \$14,938 | 2.4%  | 8   |
| 56.08 | Montgomery | Pike Road      | The Water Works & Sanitary Sewer Board of the City of Montgomery | 268  | \$373   | \$14,938 | 2.4%  | 6   | \$373    | \$14,938  | 2.4%   | 6    | \$373 | \$14,938 | 2.4%  | 6   |
| 56.09 | Montgomery | Montgomery     | The Water Works & Sanitary Sewer Board of the City of Montgomery | 2119 | \$373   | \$14,938 | 10.0% | 212 | \$373    | \$14,938  | 10.0%  | 212  | \$373 | \$14,938 | 10.0% | 212 |
| 56.1  | Montgomery | Unincorporated | OWTS                                                             | 93   | \$1,819 | \$72,778 | 66.4% | 62  | \$20,000 | \$800,000 | 99.9%  | 93   | \$100 | \$4,000  | 3.6%  | 3   |
| 56.1  | Montgomery | Montgomery     | The Water Works & Sanitary Sewer Board of the City of Montgomery | 274  | \$373   | \$14,938 | 12.5% | 34  | \$373    | \$14,938  | 12.5%  | 34   | \$373 | \$14,938 | 12.5% | 34  |
| 56.1  | Montgomery | Pike Road      | The Water Works & Sanitary Sewer Board of the City of Montgomery | 145  | \$373   | \$14,938 | 12.5% | 18  | \$373    | \$14,938  | 12.5%  | 18   | \$373 | \$14,938 | 12.5% | 18  |
| 56.11 | Montgomery | Montgomery     | The Water Works & Sanitary Sewer Board of the City of Montgomery | 1589 | \$373   | \$14,938 | 6.3%  | 100 | \$373    | \$14,938  | 6.3%   | 100  | \$373 | \$14,938 | 6.3%  | 100 |
| 56.12 | Montgomery | Montgomery     | The Water Works & Sanitary Sewer Board of the City of Montgomery | 711  | \$373   | \$14,938 | 4.4%  | 31  | \$373    | \$14,938  | 4.4%   | 31   | \$373 | \$14,938 | 4.4%  | 31  |
| 57    | Montgomery | Unincorporated | OWTS                                                             | 597  | \$1,819 | \$72,778 | 72.1% | 430 | \$20,000 | \$800,000 | 99.9%  | 597  | \$100 | \$4,000  | 4.3%  | 26  |
| 58    | Montgomery | Unincorporated | OWTS                                                             | 892  | \$1,819 | \$72,778 | 76.4% | 682 | \$20,000 | \$800,000 | 100.0% | 892  | \$100 | \$4,000  | 4.2%  | 37  |
| 59.01 | Montgomery | Unincorporated | OWTS                                                             | 1184 | \$1,819 | \$72,778 | 61.4% | 726 | \$20,000 | \$800,000 | 100.0% | 1184 | \$100 | \$4,000  | 6.0%  | 71  |

|       |            |                |                                                                  |      |         |          |       |     |          |           |        |     |       |          |       |     |
|-------|------------|----------------|------------------------------------------------------------------|------|---------|----------|-------|-----|----------|-----------|--------|-----|-------|----------|-------|-----|
| 59.01 | Montgomery | Montgomery     | The Water Works & Sanitary Sewer Board of the City of Montgomery | 721  | \$373   | \$14,938 | 26.0% | 187 | \$373    | \$14,938  | 26.0%  | 187 | \$373 | \$14,938 | 26.0% | 187 |
| 59.02 | Montgomery | Montgomery     | The Water Works & Sanitary Sewer Board of the City of Montgomery | 1226 | \$373   | \$14,938 | 26.5% | 325 | \$373    | \$14,938  | 26.5%  | 325 | \$373 | \$14,938 | 26.5% | 325 |
| 60    | Montgomery | Unincorporated | OWTS                                                             | 24   | \$1,819 | \$72,778 | 63.9% | 15  | \$20,000 | \$800,000 | 100.0% | 24  | \$100 | \$4,000  | 3.2%  | 1   |
| 60    | Montgomery | Montgomery     | The Water Works & Sanitary Sewer Board of the City of Montgomery | 1103 | \$373   | \$14,938 | 12.8% | 142 | \$373    | \$14,938  | 12.8%  | 142 | \$373 | \$14,938 | 12.8% | 142 |
| 61    | Montgomery | Montgomery     | The Water Works & Sanitary Sewer Board of the City of Montgomery | 833  | \$373   | \$14,938 | 20.0% | 167 | \$373    | \$14,938  | 20.0%  | 167 | \$373 | \$14,938 | 20.0% | 167 |
| 1     | Morgan     | Unincorporated | OWTS                                                             | 535  | \$530   | \$21,192 | 32.7% | 175 | \$5,000  | \$200,000 | 100.0% | 535 | \$100 | \$4,000  | 5.3%  | 28  |
| 1     | Morgan     | Decatur        | Decatur Utilities                                                | 1033 | \$331   | \$13,229 | 18.2% | 188 | \$331    | \$13,229  | 18.2%  | 188 | \$331 | \$13,229 | 18.2% | 188 |
| 2     | Morgan     | Decatur        | Decatur Utilities                                                | 1321 | \$331   | \$13,229 | 3.7%  | 49  | \$331    | \$13,229  | 3.7%   | 49  | \$331 | \$13,229 | 3.7%  | 49  |
| 3     | Morgan     | Decatur        | Decatur Utilities                                                | 1222 | \$331   | \$13,229 | 7.3%  | 89  | \$331    | \$13,229  | 7.3%   | 89  | \$331 | \$13,229 | 7.3%  | 89  |
| 4     | Morgan     | Unincorporated | OWTS                                                             | 165  | \$530   | \$21,192 | 18.3% | 30  | \$5,000  | \$200,000 | 100.0% | 165 | \$100 | \$4,000  | 2.2%  | 4   |
| 4     | Morgan     | Decatur        | Decatur Utilities                                                | 1405 | \$331   | \$13,229 | 9.6%  | 135 | \$331    | \$13,229  | 9.6%   | 135 | \$331 | \$13,229 | 9.6%  | 135 |
| 6     | Morgan     | Unincorporated | OWTS                                                             | 409  | \$530   | \$21,192 | 47.0% | 192 | \$5,000  | \$200,000 | 100.0% | 409 | \$100 | \$4,000  | 8.4%  | 34  |
| 6     | Morgan     | Decatur        | Decatur Utilities                                                | 471  | \$331   | \$13,229 | 24.1% | 114 | \$331    | \$13,229  | 24.1%  | 114 | \$331 | \$13,229 | 24.1% | 114 |
| 7     | Morgan     | Unincorporated | OWTS                                                             | 385  | \$530   | \$21,192 | 33.2% | 128 | \$5,000  | \$200,000 | 100.0% | 385 | \$100 | \$4,000  | 4.5%  | 17  |
| 7     | Morgan     | Decatur        | Decatur Utilities                                                | 1026 | \$331   | \$13,229 | 19.6% | 201 | \$331    | \$13,229  | 19.6%  | 201 | \$331 | \$13,229 | 19.6% | 201 |
| 8     | Morgan     | Decatur        | Decatur Utilities                                                | 1308 | \$331   | \$13,229 | 12.5% | 163 | \$331    | \$13,229  | 12.5%  | 163 | \$331 | \$13,229 | 12.5% | 163 |
| 9     | Morgan     | Decatur        | Decatur Utilities                                                | 1845 | \$331   | \$13,229 | 12.4% | 228 | \$331    | \$13,229  | 12.4%  | 228 | \$331 | \$13,229 | 12.4% | 228 |
| 10    | Morgan     | Unincorporated | OWTS                                                             | 329  | \$530   | \$21,192 | 7.2%  | 24  | \$5,000  | \$200,000 | 100.0% | 329 | \$100 | \$4,000  | 0.7%  | 2   |
| 10    | Morgan     | Decatur        | Decatur Utilities                                                | 836  | \$331   | \$13,229 | 2.0%  | 17  | \$331    | \$13,229  | 2.0%   | 17  | \$331 | \$13,229 | 2.0%  | 17  |
| 51.01 | Morgan     | Unincorporated | OWTS                                                             | 229  | \$530   | \$21,192 | 11.7% | 27  | \$5,000  | \$200,000 | 100.0% | 229 | \$100 | \$4,000  | 1.0%  | 2   |
| 51.01 | Morgan     | Trinity        | West Morgan/East Lawrence Water and Sewer Authority              | 392  | \$462   | \$18,470 | 9.8%  | 38  | \$462    | \$18,470  | 9.8%   | 38  | \$462 | \$18,470 | 9.8%  | 38  |
| 51.01 | Morgan     | Decatur        | Decatur Utilities                                                | 1275 | \$331   | \$13,229 | 5.6%  | 71  | \$331    | \$13,229  | 5.6%   | 71  | \$331 | \$13,229 | 5.6%  | 71  |
| 51.03 | Morgan     | Unincorporated | OWTS                                                             | 15   | \$530   | \$21,192 | 6.6%  | 1   | \$5,000  | \$200,000 | 99.9%  | 15  | \$100 | \$4,000  | 0.4%  | 0   |
| 51.03 | Morgan     | Decatur        | Decatur Utilities                                                | 347  | \$331   | \$13,229 | 2.3%  | 8   | \$331    | \$13,229  | 2.3%   | 8   | \$331 | \$13,229 | 2.3%  | 8   |
| 51.05 | Morgan     | Unincorporated | OWTS                                                             | 210  | \$530   | \$21,192 | 8.2%  | 17  | \$5,000  | \$200,000 | 100.0% | 210 | \$100 | \$4,000  | 1.4%  | 3   |
| 51.05 | Morgan     | Decatur        | Decatur Utilities                                                | 686  | \$331   | \$13,229 | 4.5%  | 31  | \$331    | \$13,229  | 4.5%   | 31  | \$331 | \$13,229 | 4.5%  | 31  |
| 51.06 | Morgan     | Unincorporated | OWTS                                                             | 817  | \$530   | \$21,192 | 25.6% | 210 | \$5,000  | \$200,000 | 100.0% | 817 | \$100 | \$4,000  | 3.6%  | 29  |
| 51.06 | Morgan     | Decatur        | Decatur Utilities                                                | 2173 | \$331   | \$13,229 | 15.1% | 327 | \$331    | \$13,229  | 15.1%  | 327 | \$331 | \$13,229 | 15.1% | 327 |
| 51.07 | Morgan     | Unincorporated | OWTS                                                             | 605  | \$530   | \$21,192 | 14.7% | 89  | \$5,000  | \$200,000 | 99.9%  | 605 | \$100 | \$4,000  | 3.0%  | 18  |
| 51.07 | Morgan     | Decatur        | Decatur Utilities                                                | 1057 | \$331   | \$13,229 | 9.2%  | 97  | \$331    | \$13,229  | 9.2%   | 97  | \$331 | \$13,229 | 9.2%  | 97  |
| 51.08 | Morgan     | Decatur        | Decatur Utilities                                                | 1581 | \$331   | \$13,229 | 11.5% | 181 | \$331    | \$13,229  | 11.5%  | 181 | \$331 | \$13,229 | 11.5% | 181 |
| 51.09 | Morgan     | Unincorporated | OWTS                                                             | 158  | \$530   | \$21,192 | 41.3% | 65  | \$5,000  | \$200,000 | 99.8%  | 158 | \$100 | \$4,000  | 6.2%  | 10  |
| 51.09 | Morgan     | Decatur        | Decatur Utilities                                                | 1856 | \$331   | \$13,229 | 25.1% | 466 | \$331    | \$13,229  | 25.1%  | 466 | \$331 | \$13,229 | 25.1% | 466 |

|       |         |                |                                                         |      |         |          |       |      |          |           |        |      |       |          |       |     |
|-------|---------|----------------|---------------------------------------------------------|------|---------|----------|-------|------|----------|-----------|--------|------|-------|----------|-------|-----|
| 52    | Morgan  | Unincorporated | OWTS                                                    | 2342 | \$530   | \$21,192 | 9.1%  | 212  | \$5,000  | \$200,000 | 99.8%  | 2342 | \$100 | \$4,000  | 1.0%  | 23  |
| 52    | Morgan  | Hartselle      | Hartselle Utilities                                     | 45   | \$674   | \$26,957 | 14.3% | 6    | \$674    | \$26,957  | 14.3%  | 6    | \$674 | \$26,957 | 14.3% | 6   |
| 53.01 | Morgan  | Hartselle      | Hartselle Utilities                                     | 525  | \$674   | \$26,957 | 14.9% | 78   | \$674    | \$26,957  | 14.9%  | 78   | \$674 | \$26,957 | 14.9% | 78  |
| 53.01 | Morgan  | Decatur        | Decatur Utilities                                       | 2143 | \$331   | \$13,229 | 5.1%  | 108  | \$331    | \$13,229  | 5.1%   | 108  | \$331 | \$13,229 | 5.1%  | 108 |
| 53.01 | Morgan  | Priceville     | Town of Priceville                                      | 465  | \$279   | \$11,141 | 4.2%  | 19   | \$279    | \$11,141  | 4.2%   | 19   | \$279 | \$11,141 | 4.2%  | 19  |
| 53.02 | Morgan  | Unincorporated | OWTS                                                    | 703  | \$530   | \$21,192 | 13.3% | 93   | \$5,000  | \$200,000 | 100.0% | 703  | \$100 | \$4,000  | 2.6%  | 18  |
| 53.02 | Morgan  | Hartselle      | Hartselle Utilities                                     | 727  | \$674   | \$26,957 | 18.2% | 132  | \$674    | \$26,957  | 18.2%  | 132  | \$674 | \$26,957 | 18.2% | 132 |
| 53.03 | Morgan  | Unincorporated | OWTS                                                    | 44   | \$530   | \$21,192 | 21.7% | 10   | \$5,000  | \$200,000 | 99.9%  | 44   | \$100 | \$4,000  | 4.0%  | 2   |
| 53.03 | Morgan  | Hartselle      | Hartselle Utilities                                     | 1580 | \$674   | \$26,957 | 30.3% | 479  | \$674    | \$26,957  | 30.3%  | 479  | \$674 | \$26,957 | 30.3% | 479 |
| 53.04 | Morgan  | Unincorporated | OWTS                                                    | 1015 | \$530   | \$21,192 | 13.9% | 141  | \$5,000  | \$200,000 | 100.0% | 1015 | \$100 | \$4,000  | 1.7%  | 17  |
| 53.04 | Morgan  | Hartselle      | Hartselle Utilities                                     | 1046 | \$674   | \$26,957 | 19.0% | 198  | \$674    | \$26,957  | 19.0%  | 198  | \$674 | \$26,957 | 19.0% | 198 |
| 53.04 | Morgan  | Falkville      | Town of Falkville                                       | 13   | \$303   | \$12,139 | 6.4%  | 1    | \$303    | \$12,139  | 6.4%   | 1    | \$303 | \$12,139 | 6.4%  | 1   |
| 54.04 | Morgan  | Unincorporated | OWTS                                                    | 502  | \$530   | \$21,192 | 14.6% | 73   | \$5,000  | \$200,000 | 99.9%  | 502  | \$100 | \$4,000  | 3.0%  | 15  |
| 54.04 | Morgan  | Decatur        | Decatur Utilities                                       | 809  | \$331   | \$13,229 | 9.6%  | 78   | \$331    | \$13,229  | 9.6%   | 78   | \$331 | \$13,229 | 9.6%  | 78  |
| 54.04 | Morgan  | Priceville     | Town of Priceville                                      | 908  | \$279   | \$11,141 | 8.2%  | 74   | \$279    | \$11,141  | 8.2%   | 74   | \$279 | \$11,141 | 8.2%  | 74  |
| 54.05 | Morgan  | Unincorporated | OWTS                                                    | 1400 | \$530   | \$21,192 | 16.5% | 231  | \$5,000  | \$200,000 | 100.0% | 1400 | \$100 | \$4,000  | 2.4%  | 33  |
| 54.05 | Morgan  | Somerville     | Northeast Morgan County Water and Sewer Authority       | 275  | \$360   | \$14,400 | 9.6%  | 26   | \$360    | \$14,400  | 9.6%   | 26   | \$360 | \$14,400 | 9.6%  | 26  |
| 55    | Morgan  | Unincorporated | OWTS                                                    | 1457 | \$530   | \$21,192 | 19.1% | 279  | \$5,000  | \$200,000 | 100.0% | 1457 | \$100 | \$4,000  | 1.2%  | 17  |
| 55    | Morgan  | Falkville      | Town of Falkville                                       | 478  | \$303   | \$12,139 | 6.1%  | 29   | \$303    | \$12,139  | 6.1%   | 29   | \$303 | \$12,139 | 6.1%  | 29  |
| 56    | Morgan  | Unincorporated | OWTS                                                    | 2162 | \$530   | \$21,192 | 21.7% | 469  | \$5,000  | \$200,000 | 100.0% | 2162 | \$100 | \$4,000  | 3.7%  | 80  |
| 56    | Morgan  | Eva            | OWTS                                                    | 97   | \$530   | \$21,194 | 21.7% | 21   | \$5,000  | \$200,000 | 100.0% | 97   | \$100 | \$4,000  | 3.7%  | 4   |
| 57.01 | Morgan  | Unincorporated | OWTS                                                    | 956  | \$530   | \$21,192 | 17.8% | 171  | \$5,000  | \$200,000 | 100.0% | 956  | \$100 | \$4,000  | 1.7%  | 16  |
| 57.02 | Morgan  | Unincorporated | OWTS                                                    | 2536 | \$530   | \$21,192 | 21.4% | 543  | \$5,000  | \$200,000 | 100.0% | 2536 | \$100 | \$4,000  | 2.9%  | 74  |
| 6868  | Perry   | Unincorporated | OWTS                                                    | 303  | \$1,819 | \$72,778 | 83.8% | 254  | \$20,000 | \$800,000 | 100.0% | 303  | \$100 | \$4,000  | 5.3%  | 16  |
| 6870  | Perry   | Unincorporated | OWTS                                                    | 1250 | \$1,819 | \$72,778 | 87.1% | 1089 | \$20,000 | \$800,000 | 100.0% | 1250 | \$100 | \$4,000  | 5.2%  | 66  |
| 6870  | Perry   | Marion         | City of Marion                                          | 539  | \$240   | \$9,600  | 12.6% | 68   | \$240    | \$9,600   | 12.6%  | 68   | \$240 | \$9,600  | 12.6% | 68  |
| 6871  | Perry   | Unincorporated | OWTS                                                    | 152  | \$1,819 | \$72,778 | 88.2% | 134  | \$20,000 | \$800,000 | 99.9%  | 152  | \$100 | \$4,000  | 13.2% | 20  |
| 6871  | Perry   | Uniontown      | The Waterworks and Sewer Board of the City of Uniontown | 826  | \$337   | \$13,488 | 44.1% | 365  | \$337    | \$13,488  | 44.1%  | 365  | \$337 | \$13,488 | 44.1% | 365 |
| 500   | Pickens | Unincorporated | OWTS                                                    | 1083 | \$530   | \$21,192 | 25.3% | 274  | \$5,000  | \$200,000 | 100.0% | 1083 | \$100 | \$4,000  | 4.5%  | 49  |
| 500   | Pickens | Gordo          | Gordo Water, Gas and Sewer Board                        | 700  | \$334   | \$13,354 | 14.9% | 104  | \$334    | \$13,354  | 14.9%  | 104  | \$334 | \$13,354 | 14.9% | 104 |
| 501   | Pickens | Unincorporated | OWTS                                                    | 813  | \$530   | \$21,192 | 34.8% | 283  | \$5,000  | \$200,000 | 100.0% | 813  | \$100 | \$4,000  | 5.7%  | 46  |
| 501   | Pickens | Reform         | City of Reform                                          | 651  | \$156   | \$6,226  | 8.8%  | 58   | \$156    | \$6,226   | 8.8%   | 58   | \$156 | \$6,226  | 8.8%  | 58  |
| 502   | Pickens | Unincorporated | OWTS                                                    | 910  | \$530   | \$21,192 | 21.2% | 193  | \$5,000  | \$200,000 | 100.0% | 910  | \$100 | \$4,000  | 2.5%  | 23  |
| 502   | Pickens | Ethelsville    | OWTS                                                    | 4    | \$530   | \$21,194 | 21.2% | 1    | \$5,000  | \$200,000 | 100.0% | 4    | \$100 | \$4,000  | 2.5%  | 0   |
| 503   | Pickens | Unincorporated | OWTS                                                    | 1216 | \$530   | \$21,192 | 31.3% | 381  | \$5,000  | \$200,000 | 100.0% | 1216 | \$100 | \$4,000  | 3.6%  | 44  |
| 503   | Pickens | Pickensville   | OWTS                                                    | 39   | \$530   | \$21,194 | 31.3% | 12   | \$5,000  | \$200,000 | 100.0% | 39   | \$100 | \$4,000  | 3.6%  | 1   |
| 503   | Pickens | Carrollton     | Town of Carrollton                                      | 137  | \$264   | \$10,560 | 10.9% | 15   | \$264    | \$10,560  | 10.9%  | 15   | \$264 | \$10,560 | 10.9% | 15  |

|        |          |                |                                                  |      |         |          |       |     |          |           |        |      |       |          |       |     |
|--------|----------|----------------|--------------------------------------------------|------|---------|----------|-------|-----|----------|-----------|--------|------|-------|----------|-------|-----|
| 504    | Pickens  | Unincorporated | OWTS                                             | 950  | \$530   | \$21,192 | 35.0% | 333 | \$5,000  | \$200,000 | 100.0% | 950  | \$100 | \$4,000  | 4.2%  | 40  |
| 504    | Pickens  | Pickensville   | OWTS                                             | 33   | \$530   | \$21,194 | 35.0% | 12  | \$5,000  | \$200,000 | 100.0% | 33   | \$100 | \$4,000  | 4.2%  | 1   |
| 504    | Pickens  | Memphis        | OWTS                                             | 2    | \$530   | \$21,194 | 35.0% | 1   | \$5,000  | \$200,000 | 100.0% | 2    | \$100 | \$4,000  | 4.2%  | 0   |
| 504    | Pickens  | McMullen       | OWTS                                             | 1    | \$530   | \$21,194 | 35.0% | 0   | \$5,000  | \$200,000 | 100.0% | 1    | \$100 | \$4,000  | 4.2%  | 0   |
| 504    | Pickens  | Aliceville     | Water and Sewer Board of the City of Aliceville  | 1098 | \$306   | \$12,226 | 16.2% | 178 | \$306    | \$12,226  | 16.2%  | 178  | \$306 | \$12,226 | 16.2% | 178 |
| 1886   | Pike     | Unincorporated | OWTS                                             | 708  | \$1,819 | \$72,778 | 73.4% | 520 | \$20,000 | \$800,000 | 99.9%  | 708  | \$100 | \$4,000  | 3.8%  | 27  |
| 1886   | Pike     | Banks          | OWTS                                             | 10   | \$1,819 | \$72,776 | 73.4% | 8   | \$20,000 | \$800,000 | 99.9%  | 10   | \$100 | \$4,000  | 3.8%  | 0   |
| 1887   | Pike     | Unincorporated | OWTS                                             | 127  | \$1,819 | \$72,778 | 71.9% | 91  | \$20,000 | \$800,000 | 100.0% | 127  | \$100 | \$4,000  | 3.0%  | 4   |
| 1887   | Pike     | Troy           | City of Troy                                     | 515  | \$264   | \$10,560 | 7.9%  | 41  | \$264    | \$10,560  | 7.9%   | 41   | \$264 | \$10,560 | 7.9%  | 41  |
| 1888   | Pike     | Unincorporated | OWTS                                             | 732  | \$1,819 | \$72,778 | 60.5% | 443 | \$20,000 | \$800,000 | 100.0% | 732  | \$100 | \$4,000  | 2.5%  | 18  |
| 1888   | Pike     | Goshen         | OWTS                                             | 15   | \$1,819 | \$72,776 | 60.5% | 9   | \$20,000 | \$800,000 | 100.0% | 15   | \$100 | \$4,000  | 2.5%  | 0   |
| 1889   | Pike     | Unincorporated | OWTS                                             | 21   | \$1,819 | \$72,778 | 85.3% | 18  | \$20,000 | \$800,000 | 100.0% | 21   | \$100 | \$4,000  | 11.8% | 2   |
| 1889   | Pike     | Troy           | City of Troy                                     | 1634 | \$264   | \$10,560 | 29.9% | 489 | \$264    | \$10,560  | 29.9%  | 489  | \$264 | \$10,560 | 29.9% | 489 |
| 1890   | Pike     | Unincorporated | OWTS                                             | 14   | \$1,819 | \$72,778 | 68.2% | 10  | \$20,000 | \$800,000 | 100.0% | 14   | \$100 | \$4,000  | 4.3%  | 1   |
| 1890   | Pike     | Troy           | City of Troy                                     | 3054 | \$264   | \$10,560 | 11.5% | 352 | \$264    | \$10,560  | 11.5%  | 352  | \$264 | \$10,560 | 11.5% | 352 |
| 1891   | Pike     | Unincorporated | OWTS                                             | 445  | \$1,819 | \$72,778 | 82.2% | 366 | \$20,000 | \$800,000 | 100.0% | 445  | \$100 | \$4,000  | 11.8% | 52  |
| 1891   | Pike     | Troy           | City of Troy                                     | 2028 | \$264   | \$10,560 | 30.4% | 617 | \$264    | \$10,560  | 30.4%  | 617  | \$264 | \$10,560 | 30.4% | 617 |
| 1892   | Pike     | Unincorporated | OWTS                                             | 686  | \$1,819 | \$72,778 | 65.8% | 451 | \$20,000 | \$800,000 | 99.9%  | 686  | \$100 | \$4,000  | 3.2%  | 22  |
| 1892   | Pike     | Troy           | City of Troy                                     | 296  | \$264   | \$10,560 | 8.4%  | 25  | \$264    | \$10,560  | 8.4%   | 25   | \$264 | \$10,560 | 8.4%  | 25  |
| 1893   | Pike     | Unincorporated | OWTS                                             | 140  | \$1,819 | \$72,778 | 71.5% | 100 | \$20,000 | \$800,000 | 99.9%  | 140  | \$100 | \$4,000  | 4.4%  | 6   |
| 1893   | Pike     | Brundidge      | City of Brundidge                                | 1176 | \$411   | \$16,435 | 20.3% | 239 | \$411    | \$16,435  | 20.3%  | 239  | \$411 | \$16,435 | 20.3% | 239 |
| 1      | Randolph | Unincorporated | OWTS                                             | 1322 | \$530   | \$21,192 | 33.7% | 446 | \$5,000  | \$200,000 | 99.9%  | 1322 | \$100 | \$4,000  | 5.3%  | 70  |
| 2      | Randolph | Unincorporated | OWTS                                             | 1233 | \$530   | \$21,192 | 18.1% | 223 | \$5,000  | \$200,000 | 99.9%  | 1233 | \$100 | \$4,000  | 2.6%  | 33  |
| 2      | Randolph | Woodland       | OWTS                                             | 20   | \$530   | \$21,194 | 18.1% | 4   | \$5,000  | \$200,000 | 99.9%  | 20   | \$100 | \$4,000  | 2.6%  | 1   |
| 3      | Randolph | Unincorporated | OWTS                                             | 1369 | \$530   | \$21,192 | 23.6% | 323 | \$5,000  | \$200,000 | 100.0% | 1369 | \$100 | \$4,000  | 3.6%  | 50  |
| 3      | Randolph | Wedowee        | Water, Sewer, & Gas Board of the Town of Wedowee | 314  | \$278   | \$11,131 | 10.8% | 34  | \$278    | \$11,131  | 10.8%  | 34   | \$278 | \$11,131 | 10.8% | 34  |
| 4      | Randolph | Unincorporated | OWTS                                             | 700  | \$530   | \$21,192 | 27.1% | 190 | \$5,000  | \$200,000 | 100.0% | 700  | \$100 | \$4,000  | 5.0%  | 35  |
| 4      | Randolph | Roanoke        | Roanoke Utilities Board                          | 1090 | \$529   | \$21,178 | 27.1% | 295 | \$529    | \$21,178  | 27.1%  | 295  | \$529 | \$21,178 | 27.1% | 295 |
| 5      | Randolph | Unincorporated | OWTS                                             | 485  | \$530   | \$21,192 | 22.7% | 110 | \$5,000  | \$200,000 | 99.9%  | 485  | \$100 | \$4,000  | 1.7%  | 8   |
| 5      | Randolph | Roanoke        | Roanoke Utilities Board                          | 1459 | \$529   | \$21,178 | 22.7% | 331 | \$529    | \$21,178  | 22.7%  | 331  | \$529 | \$21,178 | 22.7% | 331 |
| 6      | Randolph | Unincorporated | OWTS                                             | 455  | \$530   | \$21,192 | 28.8% | 131 | \$5,000  | \$200,000 | 100.0% | 455  | \$100 | \$4,000  | 4.0%  | 18  |
| 6      | Randolph | Wadley         | Town of Wadley                                   | 255  | \$191   | \$7,656  | 7.7%  | 20  | \$191    | \$7,656   | 7.7%   | 20   | \$191 | \$7,656  | 7.7%  | 20  |
| 302    | Russell  | Phenix City    | Phenix City Department of Public Utilities       | 804  | \$306   | \$12,240 | 23.6% | 190 | \$306    | \$12,240  | 23.6%  | 190  | \$306 | \$12,240 | 23.6% | 190 |
| 303    | Russell  | Phenix City    | Phenix City Department of Public Utilities       | 1358 | \$306   | \$12,240 | 21.8% | 296 | \$306    | \$12,240  | 21.8%  | 296  | \$306 | \$12,240 | 21.8% | 296 |
| 304.01 | Russell  | Unincorporated | OWTS                                             | 491  | \$1,819 | \$72,778 | 64.0% | 314 | \$20,000 | \$800,000 | 99.8%  | 491  | \$100 | \$4,000  | 0.8%  | 4   |
| 304.01 | Russell  | Phenix City    | Phenix City Department of Public Utilities       | 2059 | \$306   | \$12,240 | 4.5%  | 93  | \$306    | \$12,240  | 4.5%   | 93   | \$306 | \$12,240 | 4.5%  | 93  |

|        |         |                |                                                           |      |         |          |       |      |          |           |        |      |         |          |       |     |
|--------|---------|----------------|-----------------------------------------------------------|------|---------|----------|-------|------|----------|-----------|--------|------|---------|----------|-------|-----|
| 304.02 | Russell | Unincorporated | OWTS                                                      | 486  | \$1,819 | \$72,778 | 69.5% | 337  | \$20,000 | \$800,000 | 100.0% | 486  | \$100   | \$4,000  | 4.1%  | 20  |
| 304.02 | Russell | Phenix City    | Phenix City Department of Public Utilities                | 961  | \$306   | \$12,240 | 10.2% | 98   | \$306    | \$12,240  | 10.2%  | 98   | \$306   | \$12,240 | 10.2% | 98  |
| 305    | Russell | Unincorporated | OWTS                                                      | 144  | \$1,819 | \$72,778 | 70.6% | 102  | \$20,000 | \$800,000 | 100.0% | 144  | \$100   | \$4,000  | 5.4%  | 8   |
| 305    | Russell | Phenix City    | Phenix City Department of Public Utilities                | 813  | \$306   | \$12,240 | 16.8% | 136  | \$306    | \$12,240  | 16.8%  | 136  | \$306   | \$12,240 | 16.8% | 136 |
| 306    | Russell | Unincorporated | OWTS                                                      | 285  | \$1,819 | \$72,778 | 82.3% | 235  | \$20,000 | \$800,000 | 99.9%  | 285  | \$100   | \$4,000  | 8.6%  | 25  |
| 306    | Russell | Phenix City    | Phenix City Department of Public Utilities                | 2697 | \$306   | \$12,240 | 26.6% | 718  | \$306    | \$12,240  | 26.6%  | 718  | \$306   | \$12,240 | 26.6% | 718 |
| 307    | Russell | Unincorporated | OWTS                                                      | 806  | \$1,819 | \$72,778 | 86.6% | 698  | \$20,000 | \$800,000 | 99.9%  | 806  | \$100   | \$4,000  | 6.4%  | 52  |
| 307    | Russell | Phenix City    | Phenix City Department of Public Utilities                | 796  | \$306   | \$12,240 | 18.8% | 150  | \$306    | \$12,240  | 18.8%  | 150  | \$306   | \$12,240 | 18.8% | 150 |
| 308    | Russell | Unincorporated | OWTS                                                      | 36   | \$1,819 | \$72,778 | 89.3% | 32   | \$20,000 | \$800,000 | 100.0% | 36   | \$100   | \$4,000  | 9.8%  | 4   |
| 308    | Russell | Phenix City    | Phenix City Department of Public Utilities                | 1340 | \$306   | \$12,240 | 29.4% | 394  | \$306    | \$12,240  | 29.4%  | 394  | \$306   | \$12,240 | 29.4% | 394 |
| 309.01 | Russell | Unincorporated | OWTS                                                      | 2493 | \$1,819 | \$72,778 | 82.9% | 2067 | \$20,000 | \$800,000 | 100.0% | 2493 | \$100   | \$4,000  | 5.2%  | 131 |
| 309.01 | Russell | Phenix City    | Phenix City Department of Public Utilities                | 201  | \$306   | \$12,240 | 16.7% | 34   | \$306    | \$12,240  | 16.7%  | 34   | \$306   | \$12,240 | 16.7% | 34  |
| 309.02 | Russell | Unincorporated | OWTS                                                      | 2781 | \$1,819 | \$72,778 | 53.4% | 1485 | \$20,000 | \$800,000 | 100.0% | 2781 | \$100   | \$4,000  | 2.2%  | 61  |
| 309.02 | Russell | Phenix City    | Phenix City Department of Public Utilities                | 1174 | \$306   | \$12,240 | 8.7%  | 102  | \$306    | \$12,240  | 8.7%   | 102  | \$306   | \$12,240 | 8.7%  | 102 |
| 310    | Russell | Unincorporated | OWTS                                                      | 1419 | \$1,819 | \$72,778 | 64.9% | 921  | \$20,000 | \$800,000 | 100.0% | 1419 | \$100   | \$4,000  | 2.1%  | 30  |
| 311    | Russell | Unincorporated | OWTS                                                      | 568  | \$1,819 | \$72,778 | 78.0% | 443  | \$20,000 | \$800,000 | 100.0% | 568  | \$100   | \$4,000  | 3.7%  | 21  |
| 311    | Russell | Hurtsboro      | The Water and Sewer Board of the Town of Hurtsboro        | 131  | \$388   | \$15,533 | 21.7% | 29   | \$388    | \$15,533  | 21.7%  | 29   | \$388   | \$15,533 | 21.7% | 29  |
| 312    | Russell | Unincorporated | OWTS                                                      | 1419 | \$1,819 | \$72,778 | 69.3% | 984  | \$20,000 | \$800,000 | 100.0% | 1419 | \$100   | \$4,000  | 2.4%  | 34  |
| 301.02 | Shelby  | Unincorporated | OWTS                                                      | 1399 | \$530   | \$21,192 | 24.9% | 348  | \$5,000  | \$200,000 | 99.9%  | 1399 | \$100   | \$4,000  | 5.0%  | 71  |
| 301.02 | Shelby  | Vincent        | Enviro-Systems, LLC                                       | 51   | \$779   | \$31,157 | 36.8% | 19   | \$779    | \$31,157  | 36.8%  | 19   | \$779   | \$31,157 | 36.8% | 19  |
| 301.02 | Shelby  | Harpersville   | Enviro-Systems, LLC                                       | 15   | \$779   | \$31,157 | 36.8% | 6    | \$779    | \$31,157  | 36.8%  | 6    | \$779   | \$31,157 | 36.8% | 6   |
| 301.02 | Shelby  | Westover       | Enviro-Systems, LLC                                       | 6    | \$779   | \$31,157 | 36.8% | 2    | \$779    | \$31,157  | 36.8%  | 2    | \$779   | \$31,157 | 36.8% | 2   |
| 301.03 | Shelby  | Unincorporated | OWTS                                                      | 267  | \$530   | \$21,192 | 14.1% | 38   | \$5,000  | \$200,000 | 100.0% | 267  | \$100   | \$4,000  | 1.9%  | 5   |
| 301.03 | Shelby  | Harpersville   | Enviro-Systems, LLC                                       | 39   | \$779   | \$31,157 | 26.6% | 10   | \$779    | \$31,157  | 26.6%  | 10   | \$779   | \$31,157 | 26.6% | 10  |
| 301.03 | Shelby  | Westover       | Enviro-Systems, LLC                                       | 8    | \$779   | \$31,157 | 26.6% | 2    | \$779    | \$31,157  | 26.6%  | 2    | \$779   | \$31,157 | 26.6% | 2   |
| 302.11 | Shelby  | Unincorporated | OWTS                                                      | 915  | \$530   | \$21,192 | 8.2%  | 75   | \$5,000  | \$200,000 | 100.0% | 915  | \$100   | \$4,000  | 1.2%  | 11  |
| 302.11 | Shelby  | Chelsea        | Southwest Water Company-Shelby Ridge Utility Systems, LLC | 169  | \$1,041 | \$41,650 | 14.0% | 24   | \$1,041  | \$41,650  | 14.0%  | 24   | \$1,041 | \$41,650 | 14.0% | 24  |
| 302.12 | Shelby  | Birmingham     | Jefferson County Sewer                                    | 1990 | \$1,047 | \$41,890 | 43.8% | 871  | \$1,047  | \$41,890  | 43.8%  | 871  | \$1,047 | \$41,890 | 43.8% | 871 |
| 302.12 | Shelby  | Hoover         | City of Hoover                                            | 7    | \$441   | \$17,626 | 17.2% | 1    | \$441    | \$17,626  | 17.2%  | 1    | \$441   | \$17,626 | 17.2% | 1   |
| 302.13 | Shelby  | Birmingham     | Jefferson County Sewer                                    | 2223 | \$1,047 | \$41,890 | 25.4% | 564  | \$1,047  | \$41,890  | 25.4%  | 564  | \$1,047 | \$41,890 | 25.4% | 564 |
| 302.13 | Shelby  | Hoover         | City of Hoover                                            | 15   | \$441   | \$17,626 | 9.4%  | 1    | \$441    | \$17,626  | 9.4%   | 1    | \$441   | \$17,626 | 9.4%  | 1   |

|        |        |                        |                                                           |      |         |          |       |     |         |           |        |      |         |          |       |     |
|--------|--------|------------------------|-----------------------------------------------------------|------|---------|----------|-------|-----|---------|-----------|--------|------|---------|----------|-------|-----|
| 302.14 | Shelby | Chelsea                | Southwest Water Company-Shelby Ridge Utility Systems, LLC | 2805 | \$1,041 | \$41,650 | 15.1% | 423 | \$1,041 | \$41,650  | 15.1%  | 423  | \$1,041 | \$41,650 | 15.1% | 423 |
| 302.14 | Shelby | Pelham                 | City of Pelham                                            | 119  | \$508   | \$20,304 | 3.3%  | 4   | \$508   | \$20,304  | 3.3%   | 4    | \$508   | \$20,304 | 3.3%  | 4   |
| 302.15 | Shelby | Unincorporated         | OWTS                                                      | 583  | \$530   | \$21,192 | 3.7%  | 22  | \$5,000 | \$200,000 | 99.8%  | 583  | \$100   | \$4,000  | 0.7%  | 4   |
| 302.15 | Shelby | Chelsea                | Southwest Water Company-Shelby Ridge Utility Systems, LLC | 1184 | \$1,041 | \$41,650 | 15.9% | 188 | \$1,041 | \$41,650  | 15.9%  | 188  | \$1,041 | \$41,650 | 15.9% | 188 |
| 302.15 | Shelby | Westover               | Enviro-Systems, LLC                                       | 26   | \$779   | \$31,157 | 7.2%  | 2   | \$779   | \$31,157  | 7.2%   | 2    | \$779   | \$31,157 | 7.2%  | 2   |
| 302.16 | Shelby | Unincorporated         | OWTS                                                      | 649  | \$530   | \$21,192 | 7.8%  | 51  | \$5,000 | \$200,000 | 100.0% | 649  | \$100   | \$4,000  | 1.5%  | 10  |
| 302.16 | Shelby | Highland Lakes         | OWTS                                                      | 2242 | \$530   | \$21,194 | 7.8%  | 175 | \$5,000 | \$200,000 | 100.0% | 2242 | \$100   | \$4,000  | 1.5%  | 34  |
| 302.16 | Shelby | Chelsea                | Southwest Water Company-Shelby Ridge Utility Systems, LLC | 28   | \$1,041 | \$41,650 | 18.1% | 5   | \$1,041 | \$41,650  | 18.1%  | 5    | \$1,041 | \$41,650 | 18.1% | 5   |
| 302.16 | Shelby | Hoover                 | City of Hoover                                            | 129  | \$441   | \$17,626 | 7.1%  | 9   | \$441   | \$17,626  | 7.1%   | 9    | \$441   | \$17,626 | 7.1%  | 9   |
| 302.17 | Shelby | Birmingham             | Jefferson County Sewer                                    | 1606 | \$1,047 | \$41,890 | 12.9% | 208 | \$1,047 | \$41,890  | 12.9%  | 208  | \$1,047 | \$41,890 | 12.9% | 208 |
| 302.17 | Shelby | Hoover                 | City of Hoover                                            | 436  | \$441   | \$17,626 | 5.3%  | 23  | \$441   | \$17,626  | 5.3%   | 23   | \$441   | \$17,626 | 5.3%  | 23  |
| 303.03 | Shelby | Birmingham             | Jefferson County Sewer                                    | 3395 | \$1,047 | \$41,890 | 19.4% | 658 | \$1,047 | \$41,890  | 19.4%  | 658  | \$1,047 | \$41,890 | 19.4% | 658 |
| 303.03 | Shelby | Hoover                 | City of Hoover                                            | 335  | \$441   | \$17,626 | 6.3%  | 21  | \$441   | \$17,626  | 6.3%   | 21   | \$441   | \$17,626 | 6.3%  | 21  |
| 303.04 | Shelby | Vestavia Hills         | Jefferson County Sewer                                    | 1913 | \$1,047 | \$41,890 | 10.0% | 192 | \$1,047 | \$41,890  | 10.0%  | 192  | \$1,047 | \$41,890 | 10.0% | 192 |
| 303.04 | Shelby | Hoover                 | City of Hoover                                            | 288  | \$441   | \$17,626 | 3.0%  | 9   | \$441   | \$17,626  | 3.0%   | 9    | \$441   | \$17,626 | 3.0%  | 9   |
| 303.05 | Shelby | Unincorporated         | OWTS                                                      | 490  | \$530   | \$21,192 | 3.3%  | 16  | \$5,000 | \$200,000 | 100.0% | 490  | \$100   | \$4,000  | 0.4%  | 2   |
| 303.05 | Shelby | Indian Springs Village | OWTS                                                      | 819  | \$530   | \$21,194 | 3.3%  | 27  | \$5,000 | \$200,000 | 100.0% | 819  | \$100   | \$4,000  | 0.4%  | 3   |
| 303.05 | Shelby | Pelham                 | City of Pelham                                            | 38   | \$508   | \$20,304 | 3.1%  | 1   | \$508   | \$20,304  | 3.1%   | 1    | \$508   | \$20,304 | 3.1%  | 1   |
| 303.05 | Shelby | Hoover                 | City of Hoover                                            | 60   | \$441   | \$17,626 | 2.5%  | 1   | \$441   | \$17,626  | 2.5%   | 1    | \$441   | \$17,626 | 2.5%  | 1   |
| 303.06 | Shelby | Unincorporated         | OWTS                                                      | 109  | \$530   | \$21,192 | 11.4% | 12  | \$5,000 | \$200,000 | 100.0% | 109  | \$100   | \$4,000  | 2.0%  | 2   |
| 303.06 | Shelby | Alabaster              | City of Alabaster                                         | 1206 | \$568   | \$22,718 | 12.4% | 150 | \$568   | \$22,718  | 12.4%  | 150  | \$568   | \$22,718 | 12.4% | 150 |
| 303.14 | Shelby | Unincorporated         | OWTS                                                      | 1232 | \$530   | \$21,192 | 18.1% | 223 | \$5,000 | \$200,000 | 99.9%  | 1232 | \$100   | \$4,000  | 3.3%  | 41  |
| 303.14 | Shelby | Pelham                 | City of Pelham                                            | 55   | \$508   | \$20,304 | 17.6% | 10  | \$508   | \$20,304  | 17.6%  | 10   | \$508   | \$20,304 | 17.6% | 10  |
| 303.14 | Shelby | Hoover                 | City of Hoover                                            | 229  | \$441   | \$17,626 | 16.1% | 37  | \$441   | \$17,626  | 16.1%  | 37   | \$441   | \$17,626 | 16.1% | 37  |
| 303.15 | Shelby | Unincorporated         | OWTS                                                      | 893  | \$530   | \$21,192 | 10.1% | 90  | \$5,000 | \$200,000 | 100.0% | 893  | \$100   | \$4,000  | 2.1%  | 19  |
| 303.15 | Shelby | Pelham                 | City of Pelham                                            | 1273 | \$508   | \$20,304 | 9.6%  | 122 | \$508   | \$20,304  | 9.6%   | 122  | \$508   | \$20,304 | 9.6%  | 122 |
| 303.15 | Shelby | Hoover                 | City of Hoover                                            | 24   | \$441   | \$17,626 | 8.2%  | 2   | \$441   | \$17,626  | 8.2%   | 2    | \$441   | \$17,626 | 8.2%  | 2   |
| 303.16 | Shelby | Unincorporated         | OWTS                                                      | 829  | \$530   | \$21,192 | 17.6% | 146 | \$5,000 | \$200,000 | 99.9%  | 829  | \$100   | \$4,000  | 1.4%  | 12  |
| 303.16 | Shelby | Pelham                 | City of Pelham                                            | 815  | \$508   | \$20,304 | 16.8% | 137 | \$508   | \$20,304  | 16.8%  | 137  | \$508   | \$20,304 | 16.8% | 137 |
| 303.16 | Shelby | Helena                 | City of Helena Utilities Board                            | 451  | \$390   | \$15,600 | 12.6% | 57  | \$390   | \$15,600  | 12.6%  | 57   | \$390   | \$15,600 | 12.6% | 57  |
| 303.17 | Shelby | Helena                 | City of Helena Utilities Board                            | 1451 | \$390   | \$15,600 | 5.1%  | 74  | \$390   | \$15,600  | 5.1%   | 74   | \$390   | \$15,600 | 5.1%  | 74  |
| 303.19 | Shelby | Alabaster              | City of Alabaster                                         | 859  | \$568   | \$22,718 | 22.8% | 196 | \$568   | \$22,718  | 22.8%  | 196  | \$568   | \$22,718 | 22.8% | 196 |
| 303.2  | Shelby | Unincorporated         | OWTS                                                      | 518  | \$530   | \$21,192 | 6.7%  | 35  | \$5,000 | \$200,000 | 100.0% | 518  | \$100   | \$4,000  | 1.5%  | 8   |

|        |        |                        |                                |      |       |          |       |     |         |           |        |      |       |          |       |    |
|--------|--------|------------------------|--------------------------------|------|-------|----------|-------|-----|---------|-----------|--------|------|-------|----------|-------|----|
| 303.2  | Shelby | Alabaster              | City of Alabaster              | 1039 | \$568 | \$22,718 | 7.3%  | 76  | \$568   | \$22,718  | 7.3%   | 76   | \$568 | \$22,718 | 7.3%  | 76 |
| 303.2  | Shelby | Helena                 | City of Helena Utilities Board | 423  | \$390 | \$15,600 | 4.4%  | 18  | \$390   | \$15,600  | 4.4%   | 18   | \$390 | \$15,600 | 4.4%  | 18 |
| 303.3  | Shelby | Unincorporated         | OWTS                           | 2191 | \$530 | \$21,192 | 9.5%  | 208 | \$5,000 | \$200,000 | 100.0% | 2191 | \$100 | \$4,000  | 1.2%  | 27 |
| 303.3  | Shelby | Hoover                 | City of Hoover                 | 66   | \$441 | \$17,626 | 7.8%  | 5   | \$441   | \$17,626  | 7.8%   | 5    | \$441 | \$17,626 | 7.8%  | 5  |
| 303.31 | Shelby | Unincorporated         | OWTS                           | 1321 | \$530 | \$21,192 | 5.5%  | 72  | \$5,000 | \$200,000 | 100.0% | 1321 | \$100 | \$4,000  | 1.0%  | 13 |
| 303.31 | Shelby | Indian Springs Village | OWTS                           | 194  | \$530 | \$21,194 | 5.5%  | 11  | \$5,000 | \$200,000 | 100.0% | 194  | \$100 | \$4,000  | 1.0%  | 2  |
| 303.31 | Shelby | Hoover                 | City of Hoover                 | 6    | \$441 | \$17,626 | 4.7%  | 0   | \$441   | \$17,626  | 4.7%   | 0    | \$441 | \$17,626 | 4.7%  | 0  |
| 303.32 | Shelby | Unincorporated         | OWTS                           | 128  | \$530 | \$21,192 | 5.0%  | 6   | \$5,000 | \$200,000 | 100.0% | 128  | \$100 | \$4,000  | 1.3%  | 2  |
| 303.32 | Shelby | Pelham                 | City of Pelham                 | 38   | \$508 | \$20,304 | 4.7%  | 2   | \$508   | \$20,304  | 4.7%   | 2    | \$508 | \$20,304 | 4.7%  | 2  |
| 303.32 | Shelby | Helena                 | City of Helena Utilities Board | 286  | \$390 | \$15,600 | 3.5%  | 10  | \$390   | \$15,600  | 3.5%   | 10   | \$390 | \$15,600 | 3.5%  | 10 |
| 303.33 | Shelby | Unincorporated         | OWTS                           | 1525 | \$530 | \$21,192 | 4.2%  | 63  | \$5,000 | \$200,000 | 100.0% | 1525 | \$100 | \$4,000  | 0.2%  | 3  |
| 303.33 | Shelby | Pelham                 | City of Pelham                 | 173  | \$508 | \$20,304 | 3.8%  | 7   | \$508   | \$20,304  | 3.8%   | 7    | \$508 | \$20,304 | 3.8%  | 7  |
| 303.33 | Shelby | Pelham                 | City of Pelham                 | 9    | \$508 | \$20,304 | 3.8%  | 0   | \$508   | \$20,304  | 3.8%   | 0    | \$508 | \$20,304 | 3.8%  | 0  |
| 303.33 | Shelby | Hoover                 | City of Hoover                 | 254  | \$441 | \$17,626 | 2.6%  | 7   | \$441   | \$17,626  | 2.6%   | 7    | \$441 | \$17,626 | 2.6%  | 7  |
| 303.33 | Shelby | Hoover                 | City of Hoover                 | 3    | \$441 | \$17,626 | 2.6%  | 0   | \$441   | \$17,626  | 2.6%   | 0    | \$441 | \$17,626 | 2.6%  | 0  |
| 303.34 | Shelby | Unincorporated         | OWTS                           | 294  | \$530 | \$21,192 | 6.8%  | 20  | \$5,000 | \$200,000 | 100.0% | 294  | \$100 | \$4,000  | 0.4%  | 1  |
| 303.34 | Shelby | Hoover                 | City of Hoover                 | 782  | \$441 | \$17,626 | 5.1%  | 40  | \$441   | \$17,626  | 5.1%   | 40   | \$441 | \$17,626 | 5.1%  | 40 |
| 303.34 | Shelby | Hoover                 | City of Hoover                 | 2    | \$441 | \$17,626 | 5.1%  | 0   | \$441   | \$17,626  | 5.1%   | 0    | \$441 | \$17,626 | 5.1%  | 0  |
| 303.34 | Shelby | Helena                 | City of Helena Utilities Board | 364  | \$390 | \$15,600 | 4.1%  | 15  | \$390   | \$15,600  | 4.1%   | 15   | \$390 | \$15,600 | 4.1%  | 15 |
| 303.36 | Shelby | Unincorporated         | OWTS                           | 630  | \$530 | \$21,192 | 4.0%  | 25  | \$5,000 | \$200,000 | 100.0% | 630  | \$100 | \$4,000  | 0.5%  | 3  |
| 303.36 | Shelby | Helena                 | City of Helena Utilities Board | 1845 | \$390 | \$15,600 | 2.9%  | 54  | \$390   | \$15,600  | 2.9%   | 54   | \$390 | \$15,600 | 2.9%  | 54 |
| 303.37 | Shelby | Unincorporated         | OWTS                           | 179  | \$530 | \$21,192 | 13.1% | 23  | \$5,000 | \$200,000 | 99.9%  | 179  | \$100 | \$4,000  | 2.4%  | 4  |
| 303.37 | Shelby | Alabaster              | City of Alabaster              | 418  | \$568 | \$22,718 | 14.2% | 59  | \$568   | \$22,718  | 14.2%  | 59   | \$568 | \$22,718 | 14.2% | 59 |
| 303.37 | Shelby | Helena                 | City of Helena Utilities Board | 73   | \$390 | \$15,600 | 9.0%  | 7   | \$390   | \$15,600  | 9.0%   | 7    | \$390 | \$15,600 | 9.0%  | 7  |
| 303.4  | Shelby | Unincorporated         | OWTS                           | 562  | \$530 | \$21,192 | 7.9%  | 44  | \$5,000 | \$200,000 | 99.9%  | 562  | \$100 | \$4,000  | 1.1%  | 6  |
| 303.4  | Shelby | Alabaster              | City of Alabaster              | 727  | \$568 | \$22,718 | 8.8%  | 64  | \$568   | \$22,718  | 8.8%   | 64   | \$568 | \$22,718 | 8.8%  | 64 |
| 303.4  | Shelby | Pelham                 | City of Pelham                 | 282  | \$508 | \$20,304 | 7.3%  | 21  | \$508   | \$20,304  | 7.3%   | 21   | \$508 | \$20,304 | 7.3%  | 21 |
| 303.4  | Shelby | Helena                 | City of Helena Utilities Board | 424  | \$390 | \$15,600 | 4.6%  | 19  | \$390   | \$15,600  | 4.6%   | 19   | \$390 | \$15,600 | 4.6%  | 19 |
| 303.41 | Shelby | Unincorporated         | OWTS                           | 350  | \$530 | \$21,192 | 15.3% | 54  | \$5,000 | \$200,000 | 100.0% | 350  | \$100 | \$4,000  | 2.3%  | 8  |
| 303.41 | Shelby | Alabaster              | City of Alabaster              | 222  | \$568 | \$22,718 | 16.7% | 37  | \$568   | \$22,718  | 16.7%  | 37   | \$568 | \$22,718 | 16.7% | 37 |
| 303.41 | Shelby | Pelham                 | City of Pelham                 | 469  | \$508 | \$20,304 | 14.5% | 68  | \$508   | \$20,304  | 14.5%  | 68   | \$508 | \$20,304 | 14.5% | 68 |
| 303.42 | Shelby | Unincorporated         | OWTS                           | 525  | \$530 | \$21,192 | 2.5%  | 13  | \$5,000 | \$200,000 | 100.0% | 525  | \$100 | \$4,000  | 0.6%  | 3  |
| 303.42 | Shelby | Indian Springs Village | OWTS                           | 232  | \$530 | \$21,194 | 2.5%  | 6   | \$5,000 | \$200,000 | 100.0% | 232  | \$100 | \$4,000  | 0.6%  | 1  |
| 303.42 | Shelby | Pelham                 | City of Pelham                 | 26   | \$508 | \$20,304 | 2.3%  | 1   | \$508   | \$20,304  | 2.3%   | 1    | \$508 | \$20,304 | 2.3%  | 1  |



|        |        |                |                                                           |      |         |          |       |     |         |           |        |      |         |          |       |     |
|--------|--------|----------------|-----------------------------------------------------------|------|---------|----------|-------|-----|---------|-----------|--------|------|---------|----------|-------|-----|
| 303.44 | Shelby | Unincorporated | OWTS                                                      | 849  | \$530   | \$21,192 | 8.0%  | 68  | \$5,000 | \$200,000 | 100.0% | 849  | \$100   | \$4,000  | 1.3%  | 11  |
| 303.44 | Shelby | Chelsea        | Southwest Water Company-Shelby Ridge Utility Systems, LLC | 552  | \$1,041 | \$41,650 | 24.0% | 133 | \$1,041 | \$41,650  | 24.0%  | 133  | \$1,041 | \$41,650 | 24.0% | 133 |
| 303.44 | Shelby | Hoover         | City of Hoover                                            | 35   | \$441   | \$17,626 | 5.2%  | 2   | \$441   | \$17,626  | 5.2%   | 2    | \$441   | \$17,626 | 5.2%  | 2   |
| 303.45 | Shelby | Unincorporated | OWTS                                                      | 291  | \$530   | \$21,192 | 5.8%  | 17  | \$5,000 | \$200,000 | 99.9%  | 291  | \$100   | \$4,000  | 0.9%  | 3   |
| 303.45 | Shelby | Chelsea        | Southwest Water Company-Shelby Ridge Utility Systems, LLC | 158  | \$1,041 | \$41,650 | 15.1% | 24  | \$1,041 | \$41,650  | 15.1%  | 24   | \$1,041 | \$41,650 | 15.1% | 24  |
| 303.45 | Shelby | Alabaster      | City of Alabaster                                         | 27   | \$568   | \$22,718 | 6.6%  | 2   | \$568   | \$22,718  | 6.6%   | 2    | \$568   | \$22,718 | 6.6%  | 2   |
| 303.45 | Shelby | Pelham         | City of Pelham                                            | 632  | \$508   | \$20,304 | 5.3%  | 33  | \$508   | \$20,304  | 5.3%   | 33   | \$508   | \$20,304 | 5.3%  | 33  |
| 304.05 | Shelby | Unincorporated | OWTS                                                      | 358  | \$530   | \$21,192 | 30.1% | 108 | \$5,000 | \$200,000 | 100.0% | 358  | \$100   | \$4,000  | 3.3%  | 12  |
| 304.05 | Shelby | Wilton         | OWTS                                                      | 47   | \$530   | \$21,194 | 30.1% | 14  | \$5,000 | \$200,000 | 100.0% | 47   | \$100   | \$4,000  | 3.3%  | 2   |
| 304.05 | Shelby | Montevallo     | Montevallo Water and Sewer Board                          | 91   | \$556   | \$22,258 | 32.4% | 29  | \$556   | \$22,258  | 32.4%  | 29   | \$556   | \$22,258 | 32.4% | 29  |
| 304.06 | Shelby | Montevallo     | Montevallo Water and Sewer Board                          | 1322 | \$556   | \$22,258 | 27.7% | 367 | \$556   | \$22,258  | 27.7%  | 367  | \$556   | \$22,258 | 27.7% | 367 |
| 304.07 | Shelby | Unincorporated | OWTS                                                      | 55   | \$530   | \$21,192 | 36.7% | 20  | \$5,000 | \$200,000 | 100.0% | 55   | \$100   | \$4,000  | 5.4%  | 3   |
| 304.07 | Shelby | Montevallo     | Montevallo Water and Sewer Board                          | 392  | \$556   | \$22,258 | 38.8% | 152 | \$556   | \$22,258  | 38.8%  | 152  | \$556   | \$22,258 | 38.8% | 152 |
| 304.08 | Shelby | Unincorporated | OWTS                                                      | 398  | \$530   | \$21,192 | 25.7% | 102 | \$5,000 | \$200,000 | 100.0% | 398  | \$100   | \$4,000  | 3.4%  | 14  |
| 304.08 | Shelby | Wilton         | OWTS                                                      | 10   | \$530   | \$21,194 | 25.7% | 3   | \$5,000 | \$200,000 | 100.0% | 10   | \$100   | \$4,000  | 3.4%  | 0   |
| 304.08 | Shelby | Alabaster      | City of Alabaster                                         | 299  | \$568   | \$22,718 | 28.2% | 84  | \$568   | \$22,718  | 28.2%  | 84   | \$568   | \$22,718 | 28.2% | 84  |
| 304.08 | Shelby | Montevallo     | Montevallo Water and Sewer Board                          | 539  | \$556   | \$22,258 | 27.4% | 148 | \$556   | \$22,258  | 27.4%  | 148  | \$556   | \$22,258 | 27.4% | 148 |
| 305.01 | Shelby | Unincorporated | OWTS                                                      | 1051 | \$530   | \$21,192 | 20.6% | 216 | \$5,000 | \$200,000 | 100.0% | 1051 | \$100   | \$4,000  | 3.1%  | 33  |
| 305.01 | Shelby | Calera         | City of Calera                                            | 1614 | \$545   | \$21,792 | 21.3% | 344 | \$545   | \$21,792  | 21.3%  | 344  | \$545   | \$21,792 | 21.3% | 344 |
| 305.02 | Shelby | Unincorporated | OWTS                                                      | 4    | \$530   | \$21,192 | 10.3% | 0   | \$5,000 | \$200,000 | 99.9%  | 4    | \$100   | \$4,000  | 0.8%  | 0   |
| 305.02 | Shelby | Calera         | City of Calera                                            | 876  | \$545   | \$21,792 | 10.6% | 93  | \$545   | \$21,792  | 10.6%  | 93   | \$545   | \$21,792 | 10.6% | 93  |
| 305.02 | Shelby | Columbiana     | City of Columbiana                                        | 42   | \$486   | \$19,450 | 9.3%  | 4   | \$486   | \$19,450  | 9.3%   | 4    | \$486   | \$19,450 | 9.3%  | 4   |
| 306.04 | Shelby | Alabaster      | City of Alabaster                                         | 1778 | \$568   | \$22,718 | 7.2%  | 129 | \$568   | \$22,718  | 7.2%   | 129  | \$568   | \$22,718 | 7.2%  | 129 |
| 306.04 | Shelby | Montevallo     | Montevallo Water and Sewer Board                          | 700  | \$556   | \$22,258 | 7.1%  | 49  | \$556   | \$22,258  | 7.1%   | 49   | \$556   | \$22,258 | 7.1%  | 49  |
| 306.05 | Shelby | Unincorporated | OWTS                                                      | 585  | \$530   | \$21,192 | 11.6% | 68  | \$5,000 | \$200,000 | 99.9%  | 585  | \$100   | \$4,000  | 1.1%  | 6   |
| 306.05 | Shelby | Alabaster      | City of Alabaster                                         | 1949 | \$568   | \$22,718 | 13.0% | 254 | \$568   | \$22,718  | 13.0%  | 254  | \$568   | \$22,718 | 13.0% | 254 |
| 306.05 | Shelby | Montevallo     | Montevallo Water and Sewer Board                          | 93   | \$556   | \$22,258 | 12.6% | 12  | \$556   | \$22,258  | 12.6%  | 12   | \$556   | \$22,258 | 12.6% | 12  |
| 306.05 | Shelby | Calera         | City of Calera                                            | 501  | \$545   | \$21,792 | 12.2% | 61  | \$545   | \$21,792  | 12.2%  | 61   | \$545   | \$21,792 | 12.2% | 61  |
| 306.07 | Shelby | Alabaster      | City of Alabaster                                         | 2245 | \$568   | \$22,718 | 5.7%  | 128 | \$568   | \$22,718  | 5.7%   | 128  | \$568   | \$22,718 | 5.7%  | 128 |
| 306.08 | Shelby | Alabaster      | City of Alabaster                                         | 1106 | \$568   | \$22,718 | 6.7%  | 74  | \$568   | \$22,718  | 6.7%   | 74   | \$568   | \$22,718 | 6.7%  | 74  |
| 306.08 | Shelby | Calera         | City of Calera                                            | 96   | \$545   | \$21,792 | 6.1%  | 6   | \$545   | \$21,792  | 6.1%   | 6    | \$545   | \$21,792 | 6.1%  | 6   |
| 306.08 | Shelby | Pelham         | City of Pelham                                            | 189  | \$508   | \$20,304 | 5.2%  | 10  | \$508   | \$20,304  | 5.2%   | 10   | \$508   | \$20,304 | 5.2%  | 10  |
| 306.09 | Shelby | Unincorporated | OWTS                                                      | 1233 | \$530   | \$21,192 | 6.0%  | 73  | \$5,000 | \$200,000 | 99.9%  | 1233 | \$100   | \$4,000  | 0.8%  | 9   |

|        |           |                |                                                           |      |         |          |       |     |         |           |        |      |         |          |       |     |
|--------|-----------|----------------|-----------------------------------------------------------|------|---------|----------|-------|-----|---------|-----------|--------|------|---------|----------|-------|-----|
| 306.09 | Shelby    | Chelsea        | Southwest Water Company-Shelby Ridge Utility Systems, LLC | 698  | \$1,041 | \$41,650 | 17.0% | 119 | \$1,041 | \$41,650  | 17.0%  | 119  | \$1,041 | \$41,650 | 17.0% | 119 |
| 306.09 | Shelby    | Alabaster      | City of Alabaster                                         | 283  | \$568   | \$22,718 | 6.9%  | 19  | \$568   | \$22,718  | 6.9%   | 19   | \$568   | \$22,718 | 6.9%  | 19  |
| 306.09 | Shelby    | Calera         | City of Calera                                            | 427  | \$545   | \$21,792 | 6.3%  | 27  | \$545   | \$21,792  | 6.3%   | 27   | \$545   | \$21,792 | 6.3%  | 27  |
| 306.09 | Shelby    | Pelham         | City of Pelham                                            | 588  | \$508   | \$20,304 | 5.4%  | 32  | \$508   | \$20,304  | 5.4%   | 32   | \$508   | \$20,304 | 5.4%  | 32  |
| 306.09 | Shelby    | Columbiana     | City of Columbiana                                        | 32   | \$486   | \$19,450 | 4.9%  | 2   | \$486   | \$19,450  | 4.9%   | 2    | \$486   | \$19,450 | 4.9%  | 2   |
| 307.01 | Shelby    | Chelsea        | Southwest Water Company-Shelby Ridge Utility Systems, LLC | 542  | \$1,041 | \$41,650 | 34.6% | 187 | \$1,041 | \$41,650  | 34.6%  | 187  | \$1,041 | \$41,650 | 34.6% | 187 |
| 307.01 | Shelby    | Columbiana     | City of Columbiana                                        | 861  | \$486   | \$19,450 | 21.0% | 181 | \$486   | \$19,450  | 21.0%  | 181  | \$486   | \$19,450 | 21.0% | 181 |
| 307.03 | Shelby    | Unincorporated | OWTS                                                      | 604  | \$530   | \$21,192 | 30.5% | 184 | \$5,000 | \$200,000 | 100.0% | 604  | \$100   | \$4,000  | 3.6%  | 22  |
| 307.03 | Shelby    | Columbiana     | City of Columbiana                                        | 1026 | \$486   | \$19,450 | 28.1% | 288 | \$486   | \$19,450  | 28.1%  | 288  | \$486   | \$19,450 | 28.1% | 288 |
| 307.04 | Shelby    | Unincorporated | OWTS                                                      | 1470 | \$530   | \$21,192 | 14.0% | 206 | \$5,000 | \$200,000 | 99.8%  | 1470 | \$100   | \$4,000  | 2.6%  | 38  |
| 308    | Shelby    | Unincorporated | OWTS                                                      | 1225 | \$530   | \$21,192 | 12.3% | 151 | \$5,000 | \$200,000 | 100.0% | 1225 | \$100   | \$4,000  | 1.0%  | 13  |
| 308    | Shelby    | Westover       | Enviro-Systems, LLC                                       | 2    | \$779   | \$31,157 | 21.7% | 0   | \$779   | \$31,157  | 21.7%  | 0    | \$779   | \$31,157 | 21.7% | 0   |
| 308    | Shelby    | Wilsonville    | Wilsonville Waterworks Board                              | 392  | \$378   | \$15,120 | 7.1%  | 28  | \$378   | \$15,120  | 7.1%   | 28   | \$378   | \$15,120 | 7.1%  | 28  |
| 309    | Shelby    | Unincorporated | OWTS                                                      | 12   | \$530   | \$21,192 | 32.0% | 4   | \$5,000 | \$200,000 | 100.0% | 12   | \$100   | \$4,000  | 2.6%  | 0   |
| 309    | Shelby    | Leeds          | Jefferson County Sewer                                    | 1092 | \$1,047 | \$41,890 | 50.9% | 556 | \$1,047 | \$41,890  | 50.9%  | 556  | \$1,047 | \$41,890 | 50.9% | 556 |
| 309    | Shelby    | Westover       | Enviro-Systems, LLC                                       | 4    | \$779   | \$31,157 | 44.0% | 2   | \$779   | \$31,157  | 44.0%  | 2    | \$779   | \$31,157 | 44.0% | 2   |
| 401.03 | St. Clair | Trussville     | Jefferson County Sewer                                    | 1026 | \$1,047 | \$41,890 | 25.8% | 265 | \$1,047 | \$41,890  | 25.8%  | 265  | \$1,047 | \$41,890 | 25.8% | 265 |
| 401.03 | St. Clair | Moody          | Moody Governmental Utility Services Corporation           | 2136 | \$947   | \$37,872 | 23.9% | 510 | \$947   | \$37,872  | 23.9%  | 510  | \$947   | \$37,872 | 23.9% | 510 |
| 401.03 | St. Clair | Odenville      | Odenville Utilities Board                                 | 44   | \$312   | \$12,480 | 5.3%  | 2   | \$312   | \$12,480  | 5.3%   | 2    | \$312   | \$12,480 | 5.3%  | 2   |
| 401.04 | St. Clair | Leeds          | Jefferson County Sewer                                    | 1042 | \$1,047 | \$41,890 | 27.0% | 281 | \$1,047 | \$41,890  | 27.0%  | 281  | \$1,047 | \$41,890 | 27.0% | 281 |
| 401.04 | St. Clair | Moody          | Moody Governmental Utility Services Corporation           | 1043 | \$947   | \$37,872 | 21.8% | 227 | \$947   | \$37,872  | 21.8%  | 227  | \$947   | \$37,872 | 21.8% | 227 |
| 401.05 | St. Clair | Leeds          | Jefferson County Sewer                                    | 1347 | \$1,047 | \$41,890 | 36.3% | 489 | \$1,047 | \$41,890  | 36.3%  | 489  | \$1,047 | \$41,890 | 36.3% | 489 |
| 401.05 | St. Clair | Moody          | Moody Governmental Utility Services Corporation           | 290  | \$947   | \$37,872 | 31.7% | 92  | \$947   | \$37,872  | 31.7%  | 92   | \$947   | \$37,872 | 31.7% | 92  |
| 401.06 | St. Clair | Unincorporated | OWTS                                                      | 1219 | \$530   | \$21,192 | 15.7% | 191 | \$5,000 | \$200,000 | 100.0% | 1219 | \$100   | \$4,000  | 2.4%  | 29  |
| 401.06 | St. Clair | Moody          | Moody Governmental Utility Services Corporation           | 1434 | \$947   | \$37,872 | 34.5% | 495 | \$947   | \$37,872  | 34.5%  | 495  | \$947   | \$37,872 | 34.5% | 495 |
| 401.06 | St. Clair | Odenville      | Odenville Utilities Board                                 | 130  | \$312   | \$12,480 | 7.8%  | 10  | \$312   | \$12,480  | 7.8%   | 10   | \$312   | \$12,480 | 7.8%  | 10  |
| 402.01 | St. Clair | Unincorporated | OWTS                                                      | 1481 | \$530   | \$21,192 | 26.8% | 397 | \$5,000 | \$200,000 | 100.0% | 1481 | \$100   | \$4,000  | 3.0%  | 44  |
| 402.01 | St. Clair | Riverside      | OWTS                                                      | 490  | \$530   | \$21,194 | 26.8% | 131 | \$5,000 | \$200,000 | 100.0% | 490  | \$100   | \$4,000  | 3.0%  | 14  |
| 402.01 | St. Clair | Pell City      | City of Pell City                                         | 178  | \$527   | \$21,072 | 26.6% | 47  | \$527   | \$21,072  | 26.6%  | 47   | \$527   | \$21,072 | 26.6% | 47  |
| 402.03 | St. Clair | Unincorporated | OWTS                                                      | 1010 | \$530   | \$21,192 | 21.2% | 214 | \$5,000 | \$200,000 | 99.9%  | 1010 | \$100   | \$4,000  | 3.2%  | 32  |

|        |           |                |                                 |      |         |          |       |      |          |           |        |      |       |          |       |     |
|--------|-----------|----------------|---------------------------------|------|---------|----------|-------|------|----------|-----------|--------|------|-------|----------|-------|-----|
| 402.03 | St. Clair | Pell City      | City of Pell City               | 1725 | \$527   | \$21,072 | 21.0% | 363  | \$527    | \$21,072  | 21.0%  | 363  | \$527 | \$21,072 | 21.0% | 363 |
| 402.04 | St. Clair | Riverside      | OWTS                            | 18   | \$530   | \$21,194 | 21.2% | 4    | \$5,000  | \$200,000 | 99.9%  | 18   | \$100 | \$4,000  | 3.0%  | 1   |
| 402.04 | St. Clair | Pell City      | City of Pell City               | 2892 | \$527   | \$21,072 | 21.0% | 607  | \$527    | \$21,072  | 21.0%  | 607  | \$527 | \$21,072 | 21.0% | 607 |
| 402.05 | St. Clair | Unincorporated | OWTS                            | 1042 | \$530   | \$21,192 | 16.1% | 167  | \$5,000  | \$200,000 | 100.0% | 1042 | \$100 | \$4,000  | 1.4%  | 15  |
| 402.05 | St. Clair | Vincent        | Enviro-Systems, LLC             | 1    | \$779   | \$31,157 | 26.3% | 0    | \$779    | \$31,157  | 26.3%  | 0    | \$779 | \$31,157 | 26.3% | 0   |
| 402.05 | St. Clair | Pell City      | City of Pell City               | 1480 | \$527   | \$21,072 | 15.9% | 235  | \$527    | \$21,072  | 15.9%  | 235  | \$527 | \$21,072 | 15.9% | 235 |
| 403    | St. Clair | Unincorporated | OWTS                            | 1728 | \$530   | \$21,192 | 24.3% | 419  | \$5,000  | \$200,000 | 99.9%  | 1728 | \$100 | \$4,000  | 4.6%  | 79  |
| 403    | St. Clair | Ragland        | OWTS                            | 250  | \$530   | \$21,194 | 24.3% | 61   | \$5,000  | \$200,000 | 99.9%  | 250  | \$100 | \$4,000  | 4.6%  | 11  |
| 403    | St. Clair | Ashville       | City of Ashville                | 19   | \$280   | \$11,213 | 13.0% | 2    | \$280    | \$11,213  | 13.0%  | 2    | \$280 | \$11,213 | 13.0% | 2   |
| 404.01 | St. Clair | Unincorporated | OWTS                            | 1477 | \$530   | \$21,192 | 21.6% | 319  | \$5,000  | \$200,000 | 99.9%  | 1477 | \$100 | \$4,000  | 2.3%  | 34  |
| 404.01 | St. Clair | Ashville       | City of Ashville                | 322  | \$280   | \$11,213 | 7.6%  | 25   | \$280    | \$11,213  | 7.6%   | 25   | \$280 | \$11,213 | 7.6%  | 25  |
| 404.01 | St. Clair | Steele         | Town of Steele                  | 33   | \$228   | \$9,120  | 5.2%  | 2    | \$228    | \$9,120   | 5.2%   | 2    | \$228 | \$9,120  | 5.2%  | 2   |
| 404.02 | St. Clair | Unincorporated | OWTS                            | 1252 | \$530   | \$21,192 | 22.1% | 276  | \$5,000  | \$200,000 | 100.0% | 1252 | \$100 | \$4,000  | 2.4%  | 30  |
| 404.02 | St. Clair | Ashville       | City of Ashville                | 51   | \$280   | \$11,213 | 7.2%  | 4    | \$280    | \$11,213  | 7.2%   | 4    | \$280 | \$11,213 | 7.2%  | 4   |
| 404.02 | St. Clair | Steele         | Town of Steele                  | 124  | \$228   | \$9,120  | 5.5%  | 7    | \$228    | \$9,120   | 5.5%   | 7    | \$228 | \$9,120  | 5.5%  | 7   |
| 405.01 | St. Clair | Unincorporated | OWTS                            | 2245 | \$530   | \$21,192 | 7.5%  | 167  | \$5,000  | \$200,000 | 100.0% | 2245 | \$100 | \$4,000  | 1.2%  | 27  |
| 405.01 | St. Clair | Argo           | OWTS                            | 295  | \$530   | \$21,194 | 7.5%  | 22   | \$5,000  | \$200,000 | 100.0% | 295  | \$100 | \$4,000  | 1.2%  | 4   |
| 405.01 | St. Clair | Margaret       | OWTS                            | 54   | \$530   | \$21,194 | 7.5%  | 4    | \$5,000  | \$200,000 | 100.0% | 54   | \$100 | \$4,000  | 1.2%  | 1   |
| 405.01 | St. Clair | Springville    | City of Springville             | 820  | \$656   | \$26,222 | 9.9%  | 82   | \$656    | \$26,222  | 9.9%   | 82   | \$656 | \$26,222 | 9.9%  | 82  |
| 405.01 | St. Clair | Odenville      | Odenville Utilities Board       | 473  | \$312   | \$12,480 | 4.0%  | 19   | \$312    | \$12,480  | 4.0%   | 19   | \$312 | \$12,480 | 4.0%  | 19  |
| 405.02 | St. Clair | Unincorporated | OWTS                            | 1733 | \$530   | \$21,192 | 7.6%  | 133  | \$5,000  | \$200,000 | 100.0% | 1737 | \$100 | \$4,000  | 1.0%  | 18  |
| 405.02 | St. Clair | Margaret       | OWTS                            | 290  | \$530   | \$21,194 | 7.6%  | 22   | \$5,000  | \$200,000 | 100.0% | 290  | \$100 | \$4,000  | 1.0%  | 3   |
| 405.02 | St. Clair | Odenville      | Odenville Utilities Board       | 842  | \$312   | \$12,480 | 3.8%  | 32   | \$312    | \$12,480  | 3.8%   | 32   | \$312 | \$12,480 | 3.8%  | 32  |
| 113    | Sumter    | Unincorporated | OWTS                            | 1761 | \$1,819 | \$72,778 | 82.1% | 1446 | \$20,000 | \$800,000 | 100.0% | 1761 | \$100 | \$4,000  | 12.6% | 221 |
| 113    | Sumter    | Emelle         | Sumter County Sewer Authority   | 12   | \$396   | \$15,840 | 37.0% | 5    | \$396    | \$15,840  | 37.0%  | 5    | \$396 | \$15,840 | 37.0% | 5   |
| 113    | Sumter    | Livingston     | Livingston Utilities Board      | 511  | \$224   | \$8,966  | 28.2% | 144  | \$224    | \$8,966   | 28.2%  | 144  | \$224 | \$8,966  | 28.2% | 144 |
| 113    | Sumter    | Epes           | Livingston Utilities Board-Epes | 136  | \$144   | \$5,774  | 18.1% | 25   | \$144    | \$5,774   | 18.1%  | 25   | \$144 | \$5,774  | 18.1% | 25  |
| 114    | Sumter    | Unincorporated | OWTS                            | 417  | \$1,819 | \$72,778 | 85.0% | 354  | \$20,000 | \$800,000 | 100.0% | 417  | \$100 | \$4,000  | 9.4%  | 39  |
| 114    | Sumter    | Gainesville    | Sumter County Sewer Authority   | 86   | \$396   | \$15,840 | 37.3% | 32   | \$396    | \$15,840  | 37.3%  | 32   | \$396 | \$15,840 | 37.3% | 32  |
| 114    | Sumter    | Geiger         | Sumter County Sewer Authority   | 63   | \$396   | \$15,840 | 37.3% | 23   | \$396    | \$15,840  | 37.3%  | 23   | \$396 | \$15,840 | 37.3% | 23  |
| 114    | Sumter    | Emelle         | Sumter County Sewer Authority   | 19   | \$396   | \$15,840 | 37.3% | 7    | \$396    | \$15,840  | 37.3%  | 7    | \$396 | \$15,840 | 37.3% | 7   |
| 115    | Sumter    | Unincorporated | OWTS                            | 1034 | \$1,819 | \$72,778 | 86.3% | 893  | \$20,000 | \$800,000 | 100.0% | 1034 | \$100 | \$4,000  | 7.0%  | 72  |
| 115    | Sumter    | York           | City of York                    | 490  | \$332   | \$13,296 | 26.3% | 129  | \$332    | \$13,296  | 26.3%  | 129  | \$332 | \$13,296 | 26.3% | 129 |
| 115    | Sumter    | Cuba           | Town of Cuba                    | 4    | \$288   | \$11,520 | 21.5% | 1    | \$288    | \$11,520  | 21.5%  | 1    | \$288 | \$11,520 | 21.5% | 1   |
| 115    | Sumter    | Bellamy        | Sumter County Sewer Authority   | 149  | \$108   | \$4,320  | 7.6%  | 11   | \$108    | \$4,320   | 7.6%   | 11   | \$108 | \$4,320  | 7.6%  | 11  |

|        |           |                |                                                                   |      |         |          |       |     |          |           |        |      |       |          |       |     |
|--------|-----------|----------------|-------------------------------------------------------------------|------|---------|----------|-------|-----|----------|-----------|--------|------|-------|----------|-------|-----|
| 116    | Sumter    | Unincorporated | OWTS                                                              | 288  | \$1,819 | \$72,778 | 79.8% | 230 | \$20,000 | \$800,000 | 100.0% | 288  | \$100 | \$4,000  | 7.2%  | 21  |
| 116    | Sumter    | Cuba           | Town of Cuba                                                      | 231  | \$288   | \$11,520 | 21.8% | 50  | \$288    | \$11,520  | 21.8%  | 50   | \$288 | \$11,520 | 21.8% | 50  |
| 101.01 | Talladega | Unincorporated | OWTS                                                              | 1451 | \$530   | \$21,192 | 8.5%  | 123 | \$5,000  | \$200,000 | 99.9%  | 1451 | \$100 | \$4,000  | 0.6%  | 9   |
| 101.01 | Talladega | Oxford         | Water Works & Sewer Board of the City of Oxford                   | 427  | \$204   | \$8,150  | 1.2%  | 5   | \$204    | \$8,150   | 1.2%   | 5    | \$204 | \$8,150  | 1.2%  | 5   |
| 101.02 | Talladega | Unincorporated | OWTS                                                              | 1856 | \$530   | \$21,192 | 25.8% | 478 | \$5,000  | \$200,000 | 100.0% | 1856 | \$100 | \$4,000  | 3.1%  | 57  |
| 101.02 | Talladega | Munford        | OWTS                                                              | 86   | \$530   | \$21,194 | 25.8% | 22  | \$5,000  | \$200,000 | 100.0% | 86   | \$100 | \$4,000  | 3.1%  | 3   |
| 101.02 | Talladega | Oxford         | Water Works & Sewer Board of the City of Oxford                   | 67   | \$204   | \$8,150  | 6.3%  | 4   | \$204    | \$8,150   | 6.3%   | 4    | \$204 | \$8,150  | 6.3%  | 4   |
| 102.01 | Talladega | Unincorporated | OWTS                                                              | 1311 | \$530   | \$21,192 | 16.7% | 218 | \$5,000  | \$200,000 | 100.0% | 1311 | \$100 | \$4,000  | 2.9%  | 38  |
| 102.01 | Talladega | Lincoln        | City of Lincoln                                                   | 157  | \$420   | \$16,786 | 14.4% | 23  | \$420    | \$16,786  | 14.4%  | 23   | \$420 | \$16,786 | 14.4% | 23  |
| 102.02 | Talladega | Unincorporated | OWTS                                                              | 1434 | \$530   | \$21,192 | 14.3% | 206 | \$5,000  | \$200,000 | 100.0% | 1434 | \$100 | \$4,000  | 3.9%  | 56  |
| 102.02 | Talladega | Lincoln        | City of Lincoln                                                   | 166  | \$420   | \$16,786 | 11.0% | 18  | \$420    | \$16,786  | 11.0%  | 18   | \$420 | \$16,786 | 11.0% | 18  |
| 102.02 | Talladega | Oxford         | Water Works & Sewer Board of the City of Oxford                   | 72   | \$204   | \$8,150  | 7.9%  | 6   | \$204    | \$8,150   | 7.9%   | 6    | \$204 | \$8,150  | 7.9%  | 6   |
| 103.01 | Talladega | Unincorporated | OWTS                                                              | 1177 | \$530   | \$21,192 | 31.1% | 365 | \$5,000  | \$200,000 | 100.0% | 1177 | \$100 | \$4,000  | 3.4%  | 40  |
| 103.01 | Talladega | Talladega      | City of Talladega                                                 | 106  | \$400   | \$15,994 | 21.9% | 23  | \$400    | \$15,994  | 21.9%  | 23   | \$400 | \$15,994 | 21.9% | 23  |
| 103.02 | Talladega | Unincorporated | OWTS                                                              | 1857 | \$530   | \$21,192 | 17.7% | 329 | \$5,000  | \$200,000 | 99.9%  | 1857 | \$100 | \$4,000  | 1.8%  | 33  |
| 103.02 | Talladega | Lincoln        | City of Lincoln                                                   | 69   | \$420   | \$16,786 | 12.4% | 8   | \$420    | \$16,786  | 12.4%  | 8    | \$420 | \$16,786 | 12.4% | 8   |
| 104    | Talladega | Unincorporated | OWTS                                                              | 982  | \$530   | \$21,192 | 21.1% | 207 | \$5,000  | \$200,000 | 100.0% | 982  | \$100 | \$4,000  | 2.6%  | 26  |
| 104    | Talladega | Waldo          | OWTS                                                              | 30   | \$530   | \$21,194 | 21.1% | 6   | \$5,000  | \$200,000 | 100.0% | 30   | \$100 | \$4,000  | 2.6%  | 1   |
| 104    | Talladega | Talladega      | City of Talladega                                                 | 101  | \$400   | \$15,994 | 16.5% | 17  | \$400    | \$15,994  | 16.5%  | 17   | \$400 | \$15,994 | 16.5% | 17  |
| 105    | Talladega | Unincorporated | OWTS                                                              | 860  | \$530   | \$21,192 | 38.9% | 334 | \$5,000  | \$200,000 | 100.0% | 860  | \$100 | \$4,000  | 4.2%  | 36  |
| 105    | Talladega | Talladega      | City of Talladega                                                 | 307  | \$400   | \$15,994 | 19.8% | 61  | \$400    | \$15,994  | 19.8%  | 61   | \$400 | \$15,994 | 19.8% | 61  |
| 106    | Talladega | Talladega      | City of Talladega                                                 | 1348 | \$400   | \$15,994 | 43.2% | 582 | \$400    | \$15,994  | 43.2%  | 582  | \$400 | \$15,994 | 43.2% | 582 |
| 107    | Talladega | Unincorporated | OWTS                                                              | 403  | \$530   | \$21,192 | 23.2% | 94  | \$5,000  | \$200,000 | 100.0% | 403  | \$100 | \$4,000  | 5.3%  | 21  |
| 107    | Talladega | Talladega      | City of Talladega                                                 | 13   | \$400   | \$15,994 | 18.3% | 2   | \$400    | \$15,994  | 18.3%  | 2    | \$400 | \$15,994 | 18.3% | 2   |
| 109    | Talladega | Talladega      | City of Talladega                                                 | 1080 | \$400   | \$15,994 | 14.6% | 157 | \$400    | \$15,994  | 14.6%  | 157  | \$400 | \$15,994 | 14.6% | 157 |
| 110    | Talladega | Unincorporated | OWTS                                                              | 1065 | \$530   | \$21,192 | 32.0% | 341 | \$5,000  | \$200,000 | 99.9%  | 1065 | \$100 | \$4,000  | 3.9%  | 42  |
| 110    | Talladega | Waldo          | OWTS                                                              | 25   | \$530   | \$21,194 | 32.0% | 8   | \$5,000  | \$200,000 | 99.9%  | 25   | \$100 | \$4,000  | 3.9%  | 1   |
| 110    | Talladega | Talladega      | City of Talladega                                                 | 140  | \$400   | \$15,994 | 22.3% | 31  | \$400    | \$15,994  | 22.3%  | 31   | \$400 | \$15,994 | 22.3% | 31  |
| 111    | Talladega | Unincorporated | OWTS                                                              | 1563 | \$530   | \$21,192 | 20.7% | 324 | \$5,000  | \$200,000 | 100.0% | 1563 | \$100 | \$4,000  | 4.9%  | 76  |
| 111    | Talladega | Childersburg   | The Water Works, Sewer, and Gas Board of the City of Childersburg | 2    | \$510   | \$20,400 | 20.6% | 0   | \$510    | \$20,400  | 20.6%  | 0    | \$510 | \$20,400 | 20.6% | 0   |
| 111    | Talladega | Sylacauga      | Utilities Board of the City of Sylacauga                          | 259  | \$451   | \$18,024 | 20.0% | 52  | \$451    | \$18,024  | 20.0%  | 52   | \$451 | \$18,024 | 20.0% | 52  |
| 111    | Talladega | Talladega      | City of Talladega                                                 | 42   | \$400   | \$15,994 | 19.4% | 8   | \$400    | \$15,994  | 19.4%  | 8    | \$400 | \$15,994 | 19.4% | 8   |
| 112    | Talladega | Unincorporated | OWTS                                                              | 523  | \$530   | \$21,192 | 23.8% | 125 | \$5,000  | \$200,000 | 100.0% | 523  | \$100 | \$4,000  | 3.1%  | 16  |

|      |            |                   |                                                                   |      |       |          |       |     |         |           |        |      |       |          |       |     |
|------|------------|-------------------|-------------------------------------------------------------------|------|-------|----------|-------|-----|---------|-----------|--------|------|-------|----------|-------|-----|
| 112  | Talladega  | Vincent           | Enviro-Systems, LLC                                               | 1    | \$779 | \$31,157 | 37.6% | 0   | \$779   | \$31,157  | 37.6%  | 0    | \$779 | \$31,157 | 37.6% | 0   |
| 112  | Talladega  | Childersburg      | The Water Works, Sewer, and Gas Board of the City of Childersburg | 351  | \$510 | \$20,400 | 22.9% | 80  | \$510   | \$20,400  | 22.9%  | 80   | \$510 | \$20,400 | 22.9% | 80  |
| 113  | Talladega  | Unincorporated    | OWTS                                                              | 1648 | \$530 | \$21,192 | 30.0% | 495 | \$5,000 | \$200,000 | 99.9%  | 1648 | \$100 | \$4,000  | 4.0%  | 66  |
| 113  | Talladega  | Bon Air           | OWTS                                                              | 124  | \$530 | \$21,194 | 30.0% | 37  | \$5,000 | \$200,000 | 99.9%  | 124  | \$100 | \$4,000  | 4.0%  | 5   |
| 113  | Talladega  | Childersburg      | The Water Works, Sewer, and Gas Board of the City of Childersburg | 724  | \$510 | \$20,400 | 28.6% | 207 | \$510   | \$20,400  | 28.6%  | 207  | \$510 | \$20,400 | 28.6% | 207 |
| 114  | Talladega  | Unincorporated    | OWTS                                                              | 829  | \$530 | \$21,192 | 26.1% | 217 | \$5,000 | \$200,000 | 100.0% | 829  | \$100 | \$4,000  | 3.2%  | 27  |
| 114  | Talladega  | Bon Air           | OWTS                                                              | 3    | \$530 | \$21,194 | 26.1% | 1   | \$5,000 | \$200,000 | 100.0% | 3    | \$100 | \$4,000  | 3.2%  | 0   |
| 114  | Talladega  | Childersburg      | The Water Works, Sewer, and Gas Board of the City of Childersburg | 78   | \$510 | \$20,400 | 25.1% | 20  | \$510   | \$20,400  | 25.1%  | 20   | \$510 | \$20,400 | 25.1% | 20  |
| 114  | Talladega  | Sylacauga         | Utilities Board of the City of Sylacauga                          | 18   | \$451 | \$18,024 | 21.8% | 4   | \$451   | \$18,024  | 21.8%  | 4    | \$451 | \$18,024 | 21.8% | 4   |
| 115  | Talladega  | Unincorporated    | OWTS                                                              | 1099 | \$530 | \$21,192 | 11.9% | 131 | \$5,000 | \$200,000 | 99.9%  | 1099 | \$100 | \$4,000  | 0.8%  | 9   |
| 115  | Talladega  | Talladega Springs | OWTS                                                              | 28   | \$530 | \$21,194 | 11.9% | 3   | \$5,000 | \$200,000 | 99.9%  | 28   | \$100 | \$4,000  | 0.8%  | 0   |
| 115  | Talladega  | Childersburg      | The Water Works, Sewer, and Gas Board of the City of Childersburg | 22   | \$510 | \$20,400 | 10.8% | 2   | \$510   | \$20,400  | 10.8%  | 2    | \$510 | \$20,400 | 10.8% | 2   |
| 115  | Talladega  | Sylacauga         | Utilities Board of the City of Sylacauga                          | 1048 | \$451 | \$18,024 | 7.4%  | 77  | \$451   | \$18,024  | 7.4%   | 77   | \$451 | \$18,024 | 7.4%  | 77  |
| 115  | Talladega  | Oak Grove         | Utilities Board of the City of Sylacauga                          | 58   | \$451 | \$18,024 | 7.4%  | 4   | \$451   | \$18,024  | 7.4%   | 4    | \$451 | \$18,024 | 7.4%  | 4   |
| 116  | Talladega  | Unincorporated    | OWTS                                                              | 700  | \$530 | \$21,192 | 33.8% | 237 | \$5,000 | \$200,000 | 100.0% | 700  | \$100 | \$4,000  | 3.4%  | 24  |
| 116  | Talladega  | Sylacauga         | Utilities Board of the City of Sylacauga                          | 1141 | \$451 | \$18,024 | 29.2% | 333 | \$451   | \$18,024  | 29.2%  | 333  | \$451 | \$18,024 | 29.2% | 333 |
| 117  | Talladega  | Unincorporated    | OWTS                                                              | 733  | \$530 | \$21,192 | 31.8% | 233 | \$5,000 | \$200,000 | 100.0% | 733  | \$100 | \$4,000  | 5.7%  | 42  |
| 117  | Talladega  | Sylacauga         | Utilities Board of the City of Sylacauga                          | 938  | \$451 | \$18,024 | 26.6% | 249 | \$451   | \$18,024  | 26.6%  | 249  | \$451 | \$18,024 | 26.6% | 249 |
| 117  | Talladega  | Oak Grove         | Utilities Board of the City of Sylacauga                          | 38   | \$451 | \$18,024 | 26.6% | 10  | \$451   | \$18,024  | 26.6%  | 10   | \$451 | \$18,024 | 26.6% | 10  |
| 118  | Talladega  | Unincorporated    | OWTS                                                              | 212  | \$530 | \$21,192 | 56.8% | 121 | \$5,000 | \$200,000 | 100.0% | 212  | \$100 | \$4,000  | 11.8% | 25  |
| 118  | Talladega  | Sylacauga         | Utilities Board of the City of Sylacauga                          | 706  | \$451 | \$18,024 | 50.9% | 359 | \$451   | \$18,024  | 50.9%  | 359  | \$451 | \$18,024 | 50.9% | 359 |
| 119  | Talladega  | Sylacauga         | Utilities Board of the City of Sylacauga                          | 1107 | \$451 | \$18,024 | 26.5% | 294 | \$451   | \$18,024  | 26.5%  | 294  | \$451 | \$18,024 | 26.5% | 294 |
| 120  | Talladega  | Unincorporated    | OWTS                                                              | 4    | \$530 | \$21,192 | 26.4% | 1   | \$5,000 | \$200,000 | 100.0% | 4    | \$100 | \$4,000  | 2.8%  | 0   |
| 120  | Talladega  | Sylacauga         | Utilities Board of the City of Sylacauga                          | 805  | \$451 | \$18,024 | 21.7% | 175 | \$451   | \$18,024  | 21.7%  | 175  | \$451 | \$18,024 | 21.7% | 175 |
| 9619 | Tallapoosa | Unincorporated    | OWTS                                                              | 842  | \$530 | \$21,192 | 22.8% | 192 | \$5,000 | \$200,000 | 100.0% | 842  | \$100 | \$4,000  | 2.4%  | 20  |

|        |            |                |                                       |      |       |          |       |     |         |           |        |      |       |          |       |     |
|--------|------------|----------------|---------------------------------------|------|-------|----------|-------|-----|---------|-----------|--------|------|-------|----------|-------|-----|
| 9619   | Tallapoosa | New Site       | OWTS                                  | 65   | \$530 | \$21,194 | 22.8% | 15  | \$5,000 | \$200,000 | 100.0% | 65   | \$100 | \$4,000  | 2.4%  | 2   |
| 9619   | Tallapoosa | Daviston       | OWTS                                  | 60   | \$530 | \$21,194 | 22.8% | 14  | \$5,000 | \$200,000 | 100.0% | 60   | \$100 | \$4,000  | 2.4%  | 1   |
| 9619   | Tallapoosa | Goldville      | OWTS                                  | 6    | \$530 | \$21,194 | 22.8% | 1   | \$5,000 | \$200,000 | 100.0% | 6    | \$100 | \$4,000  | 2.4%  | 0   |
| 9620   | Tallapoosa | Unincorporated | OWTS                                  | 1165 | \$530 | \$21,192 | 26.1% | 304 | \$5,000 | \$200,000 | 100.0% | 1165 | \$100 | \$4,000  | 4.2%  | 49  |
| 9620   | Tallapoosa | Alexander City | City of Alexander City                | 490  | \$576 | \$23,059 | 28.3% | 139 | \$576   | \$23,059  | 28.3%  | 139  | \$576 | \$23,059 | 28.3% | 139 |
| 9621   | Tallapoosa | Unincorporated | OWTS                                  | 288  | \$530 | \$21,192 | 39.1% | 113 | \$5,000 | \$200,000 | 100.0% | 288  | \$100 | \$4,000  | 7.6%  | 22  |
| 9621   | Tallapoosa | Alexander City | City of Alexander City                | 1251 | \$576 | \$23,059 | 42.2% | 527 | \$576   | \$23,059  | 42.2%  | 527  | \$576 | \$23,059 | 42.2% | 527 |
| 9622   | Tallapoosa | Unincorporated | OWTS                                  | 179  | \$530 | \$21,192 | 24.4% | 44  | \$5,000 | \$200,000 | 100.0% | 179  | \$100 | \$4,000  | 1.6%  | 3   |
| 9622   | Tallapoosa | Alexander City | City of Alexander City                | 1726 | \$576 | \$23,059 | 27.5% | 474 | \$576   | \$23,059  | 27.5%  | 474  | \$576 | \$23,059 | 27.5% | 474 |
| 9623   | Tallapoosa | Unincorporated | OWTS                                  | 11   | \$530 | \$21,192 | 19.1% | 2   | \$5,000 | \$200,000 | 100.0% | 11   | \$100 | \$4,000  | 3.1%  | 0   |
| 9623   | Tallapoosa | Alexander City | City of Alexander City                | 2390 | \$576 | \$23,059 | 20.8% | 497 | \$576   | \$23,059  | 20.8%  | 497  | \$576 | \$23,059 | 20.8% | 497 |
| 9624   | Tallapoosa | Unincorporated | OWTS                                  | 424  | \$530 | \$21,192 | 36.1% | 153 | \$5,000 | \$200,000 | 99.9%  | 424  | \$100 | \$4,000  | 6.2%  | 26  |
| 9624   | Tallapoosa | Jacksons' Gap  | OWTS                                  | 1    | \$530 | \$21,194 | 36.1% | 0   | \$5,000 | \$200,000 | 99.9%  | 1    | \$100 | \$4,000  | 6.2%  | 0   |
| 9624   | Tallapoosa | Dadeville      | Dadeville Water Works and Sewer Board | 1062 | \$756 | \$30,240 | 47.1% | 500 | \$756   | \$30,240  | 47.1%  | 500  | \$756 | \$30,240 | 47.1% | 500 |
| 9625   | Tallapoosa | Unincorporated | OWTS                                  | 1206 | \$530 | \$21,192 | 17.7% | 213 | \$5,000 | \$200,000 | 100.0% | 1206 | \$100 | \$4,000  | 2.4%  | 28  |
| 9625   | Tallapoosa | Jacksons' Gap  | OWTS                                  | 203  | \$530 | \$21,194 | 17.7% | 36  | \$5,000 | \$200,000 | 100.0% | 203  | \$100 | \$4,000  | 2.4%  | 5   |
| 9625   | Tallapoosa | Dadeville      | Dadeville Water Works and Sewer Board | 133  | \$756 | \$30,240 | 28.6% | 38  | \$756   | \$30,240  | 28.6%  | 38   | \$756 | \$30,240 | 28.6% | 38  |
| 9625   | Tallapoosa | Alexander City | City of Alexander City                | 418  | \$576 | \$23,059 | 20.1% | 84  | \$576   | \$23,059  | 20.1%  | 84   | \$576 | \$23,059 | 20.1% | 84  |
| 9625   | Tallapoosa | Unincorporated | OWTS                                  | 1393 | \$530 | \$21,192 | 12.7% | 177 | \$5,000 | \$200,000 | 100.0% | 1393 | \$100 | \$4,000  | 2.7%  | 37  |
| 9626   | Tallapoosa | Unincorporated | OWTS                                  | 458  | \$530 | \$21,192 | 40.2% | 184 | \$5,000 | \$200,000 | 100.0% | 458  | \$100 | \$4,000  | 7.9%  | 36  |
| 9626   | Tallapoosa | Dadeville      | Dadeville Water Works and Sewer Board | 1    | \$756 | \$30,240 | 50.8% | 0   | \$756   | \$30,240  | 50.8%  | 0    | \$756 | \$30,240 | 50.8% | 0   |
| 9626   | Tallapoosa | Camp Hill      | Town of Camp Hill                     | 196  | \$432 | \$17,280 | 36.9% | 72  | \$432   | \$17,280  | 36.9%  | 72   | \$432 | \$17,280 | 36.9% | 72  |
| 9627   | Tallapoosa | Unincorporated | OWTS                                  | 1529 | \$530 | \$21,192 | 23.9% | 366 | \$5,000 | \$200,000 | 100.0% | 1529 | \$100 | \$4,000  | 3.8%  | 57  |
| 9627   | Tallapoosa | Tallassee      | City of Tallassee                     | 709  | \$271 | \$10,848 | 10.4% | 74  | \$271   | \$10,848  | 10.4%  | 74   | \$271 | \$10,848 | 10.4% | 74  |
| 101.01 | Tuscaloosa | Tuscaloosa     | City of Tuscaloosa                    | 1541 | \$383 | \$15,331 | 3.1%  | 47  | \$383   | \$15,331  | 3.1%   | 47   | \$383 | \$15,331 | 3.1%  | 47  |
| 101.02 | Tuscaloosa | Tuscaloosa     | City of Tuscaloosa                    | 1048 | \$383 | \$15,331 | 10.5% | 110 | \$383   | \$15,331  | 10.5%  | 110  | \$383 | \$15,331 | 10.5% | 110 |
| 101.03 | Tuscaloosa | Unincorporated | OWTS                                  | 1424 | \$530 | \$21,192 | 13.6% | 194 | \$5,000 | \$200,000 | 100.0% | 1424 | \$100 | \$4,000  | 1.8%  | 26  |
| 101.03 | Tuscaloosa | Tuscaloosa     | City of Tuscaloosa                    | 769  | \$383 | \$15,331 | 8.0%  | 62  | \$383   | \$15,331  | 8.0%   | 62   | \$383 | \$15,331 | 8.0%  | 62  |
| 102.01 | Tuscaloosa | Unincorporated | OWTS                                  | 772  | \$530 | \$21,192 | 5.2%  | 40  | \$5,000 | \$200,000 | 99.9%  | 772  | \$100 | \$4,000  | 1.7%  | 13  |
| 102.01 | Tuscaloosa | Northport      | City of Northport                     | 459  | \$445 | \$17,808 | 4.7%  | 22  | \$445   | \$17,808  | 4.7%   | 22   | \$445 | \$17,808 | 4.7%  | 22  |
| 102.02 | Tuscaloosa | Unincorporated | OWTS                                  | 1254 | \$530 | \$21,192 | 14.3% | 179 | \$5,000 | \$200,000 | 100.0% | 1254 | \$100 | \$4,000  | 1.3%  | 17  |
| 102.02 | Tuscaloosa | Northport      | City of Northport                     | 2156 | \$445 | \$17,808 | 11.5% | 247 | \$445   | \$17,808  | 11.5%  | 247  | \$445 | \$17,808 | 11.5% | 247 |
| 102.02 | Tuscaloosa | Tuscaloosa     | City of Tuscaloosa                    | 128  | \$383 | \$15,331 | 9.4%  | 12  | \$383   | \$15,331  | 9.4%   | 12   | \$383 | \$15,331 | 9.4%  | 12  |
| 102.03 | Tuscaloosa | Northport      | City of Northport                     | 121  | \$445 | \$17,808 | 10.7% | 13  | \$445   | \$17,808  | 10.7%  | 13   | \$445 | \$17,808 | 10.7% | 13  |
| 102.03 | Tuscaloosa | Tuscaloosa     | City of Tuscaloosa                    | 839  | \$383 | \$15,331 | 10.0% | 84  | \$383   | \$15,331  | 10.0%  | 84   | \$383 | \$15,331 | 10.0% | 84  |
| 102.04 | Tuscaloosa | Unincorporated | OWTS                                  | 1107 | \$530 | \$21,192 | 17.1% | 190 | \$5,000 | \$200,000 | 100.0% | 1107 | \$100 | \$4,000  | 2.4%  | 27  |
| 102.04 | Tuscaloosa | Northport      | City of Northport                     | 1067 | \$445 | \$17,808 | 14.2% | 151 | \$445   | \$17,808  | 14.2%  | 151  | \$445 | \$17,808 | 14.2% | 151 |
| 103.01 | Tuscaloosa | Unincorporated | OWTS                                  | 814  | \$530 | \$21,192 | 11.2% | 91  | \$5,000 | \$200,000 | 100.0% | 814  | \$100 | \$4,000  | 0.9%  | 7   |
| 103.01 | Tuscaloosa | Coker          | OWTS                                  | 31   | \$530 | \$21,194 | 11.2% | 4   | \$5,000 | \$200,000 | 100.0% | 31   | \$100 | \$4,000  | 0.9%  | 0   |

|        |            |                |                    |      |       |          |       |     |         |           |        |      |       |          |       |     |
|--------|------------|----------------|--------------------|------|-------|----------|-------|-----|---------|-----------|--------|------|-------|----------|-------|-----|
| 103.01 | Tuscaloosa | Northport      | City of Northport  | 1763 | \$445 | \$17,808 | 9.0%  | 159 | \$445   | \$17,808  | 9.0%   | 159  | \$445 | \$17,808 | 9.0%  | 159 |
| 103.02 | Tuscaloosa | Unincorporated | OWTS               | 233  | \$530 | \$21,192 | 15.6% | 36  | \$5,000 | \$200,000 | 100.0% | 233  | \$100 | \$4,000  | 1.6%  | 4   |
| 103.02 | Tuscaloosa | Coker          | OWTS               | 26   | \$530 | \$21,194 | 15.6% | 4   | \$5,000 | \$200,000 | 100.0% | 26   | \$100 | \$4,000  | 1.6%  | 0   |
| 103.02 | Tuscaloosa | Northport      | City of Northport  | 201  | \$445 | \$17,808 | 10.5% | 21  | \$445   | \$17,808  | 10.5%  | 21   | \$445 | \$17,808 | 10.5% | 21  |
| 103.02 | Tuscaloosa | Tuscaloosa     | City of Tuscaloosa | 675  | \$383 | \$15,331 | 6.8%  | 46  | \$383   | \$15,331  | 6.8%   | 46   | \$383 | \$15,331 | 6.8%  | 46  |
| 103.03 | Tuscaloosa | Unincorporated | OWTS               | 1086 | \$530 | \$21,192 | 7.5%  | 82  | \$5,000 | \$200,000 | 99.9%  | 1086 | \$100 | \$4,000  | 1.4%  | 15  |
| 104.03 | Tuscaloosa | Unincorporated | OWTS               | 265  | \$530 | \$21,192 | 27.8% | 74  | \$5,000 | \$200,000 | 100.0% | 265  | \$100 | \$4,000  | 2.4%  | 6   |
| 104.03 | Tuscaloosa | Northport      | City of Northport  | 1185 | \$445 | \$17,808 | 22.9% | 272 | \$445   | \$17,808  | 22.9%  | 272  | \$445 | \$17,808 | 22.9% | 272 |
| 104.04 | Tuscaloosa | Northport      | City of Northport  | 912  | \$445 | \$17,808 | 26.5% | 242 | \$445   | \$17,808  | 26.5%  | 242  | \$445 | \$17,808 | 26.5% | 242 |
| 104.05 | Tuscaloosa | Unincorporated | OWTS               | 156  | \$530 | \$21,192 | 8.5%  | 13  | \$5,000 | \$200,000 | 100.0% | 156  | \$100 | \$4,000  | 2.2%  | 3   |
| 104.05 | Tuscaloosa | Tuscaloosa     | City of Tuscaloosa | 1443 | \$383 | \$15,331 | 7.7%  | 112 | \$383   | \$15,331  | 7.7%   | 112  | \$383 | \$15,331 | 7.7%  | 112 |
| 104.06 | Tuscaloosa | Northport      | City of Northport  | 64   | \$445 | \$17,808 | 7.8%  | 5   | \$445   | \$17,808  | 7.8%   | 5    | \$445 | \$17,808 | 7.8%  | 5   |
| 104.06 | Tuscaloosa | Tuscaloosa     | City of Tuscaloosa | 1961 | \$383 | \$15,331 | 6.1%  | 120 | \$383   | \$15,331  | 6.1%   | 120  | \$383 | \$15,331 | 6.1%  | 120 |
| 104.07 | Tuscaloosa | Northport      | City of Northport  | 112  | \$445 | \$17,808 | 18.8% | 21  | \$445   | \$17,808  | 18.8%  | 21   | \$445 | \$17,808 | 18.8% | 21  |
| 104.07 | Tuscaloosa | Tuscaloosa     | City of Tuscaloosa | 1622 | \$383 | \$15,331 | 16.2% | 262 | \$383   | \$15,331  | 16.2%  | 262  | \$383 | \$15,331 | 16.2% | 262 |
| 105    | Tuscaloosa | Unincorporated | OWTS               | 666  | \$530 | \$21,192 | 37.0% | 246 | \$5,000 | \$200,000 | 100.0% | 666  | \$100 | \$4,000  | 4.9%  | 33  |
| 105    | Tuscaloosa | Tuscaloosa     | City of Tuscaloosa | 172  | \$383 | \$15,331 | 25.5% | 44  | \$383   | \$15,331  | 25.5%  | 44   | \$383 | \$15,331 | 25.5% | 44  |
| 106.01 | Tuscaloosa | Unincorporated | OWTS               | 1254 | \$530 | \$21,192 | 15.1% | 189 | \$5,000 | \$200,000 | 100.0% | 1254 | \$100 | \$4,000  | 2.4%  | 30  |
| 106.01 | Tuscaloosa | Brookwood      | OWTS               | 71   | \$530 | \$21,194 | 15.1% | 11  | \$5,000 | \$200,000 | 100.0% | 71   | \$100 | \$4,000  | 2.4%  | 2   |
| 106.01 | Tuscaloosa | Tuscaloosa     | City of Tuscaloosa | 203  | \$383 | \$15,331 | 10.3% | 21  | \$383   | \$15,331  | 10.3%  | 21   | \$383 | \$15,331 | 10.3% | 21  |
| 106.02 | Tuscaloosa | Unincorporated | OWTS               | 3000 | \$530 | \$21,192 | 11.0% | 329 | \$5,000 | \$200,000 | 100.0% | 3000 | \$100 | \$4,000  | 1.1%  | 34  |
| 106.02 | Tuscaloosa | Lake View      | OWTS               | 142  | \$530 | \$21,194 | 11.0% | 16  | \$5,000 | \$200,000 | 100.0% | 142  | \$100 | \$4,000  | 1.1%  | 2   |
| 106.02 | Tuscaloosa | Woodstock      | OWTS               | 123  | \$530 | \$21,194 | 11.0% | 13  | \$5,000 | \$200,000 | 100.0% | 123  | \$100 | \$4,000  | 1.1%  | 1   |
| 106.02 | Tuscaloosa | Vance          | Town of Vance      | 7    | \$307 | \$12,288 | 3.9%  | 0   | \$307   | \$12,288  | 3.9%   | 0    | \$307 | \$12,288 | 3.9%  | 0   |
| 107.01 | Tuscaloosa | Unincorporated | OWTS               | 2122 | \$530 | \$21,192 | 12.4% | 264 | \$5,000 | \$200,000 | 100.0% | 2122 | \$100 | \$4,000  | 1.3%  | 28  |
| 107.01 | Tuscaloosa | Moundville     | City of Moundville | 253  | \$417 | \$16,661 | 8.7%  | 22  | \$417   | \$16,661  | 8.7%   | 22   | \$417 | \$16,661 | 8.7%  | 22  |
| 107.02 | Tuscaloosa | Unincorporated | OWTS               | 1349 | \$530 | \$21,192 | 13.6% | 184 | \$5,000 | \$200,000 | 99.9%  | 1349 | \$100 | \$4,000  | 2.0%  | 26  |
| 107.02 | Tuscaloosa | Coaling        | OWTS               | 131  | \$530 | \$21,194 | 13.6% | 18  | \$5,000 | \$200,000 | 99.9%  | 131  | \$100 | \$4,000  | 2.0%  | 3   |
| 107.02 | Tuscaloosa | Brookwood      | OWTS               | 9    | \$530 | \$21,194 | 13.6% | 1   | \$5,000 | \$200,000 | 99.9%  | 9    | \$100 | \$4,000  | 2.0%  | 0   |
| 107.02 | Tuscaloosa | Tuscaloosa     | City of Tuscaloosa | 1070 | \$383 | \$15,331 | 7.1%  | 76  | \$383   | \$15,331  | 7.1%   | 76   | \$383 | \$15,331 | 7.1%  | 76  |
| 107.03 | Tuscaloosa | Unincorporated | OWTS               | 338  | \$530 | \$21,192 | 13.0% | 44  | \$5,000 | \$200,000 | 100.0% | 338  | \$100 | \$4,000  | 1.0%  | 4   |
| 107.03 | Tuscaloosa | Woodstock      | OWTS               | 18   | \$530 | \$21,194 | 13.0% | 2   | \$5,000 | \$200,000 | 100.0% | 18   | \$100 | \$4,000  | 1.0%  | 0   |
| 107.03 | Tuscaloosa | Brookwood      | OWTS               | 11   | \$530 | \$21,194 | 13.0% | 1   | \$5,000 | \$200,000 | 100.0% | 11   | \$100 | \$4,000  | 1.0%  | 0   |
| 107.03 | Tuscaloosa | Tuscaloosa     | City of Tuscaloosa | 343  | \$383 | \$15,331 | 5.0%  | 17  | \$383   | \$15,331  | 5.0%   | 17   | \$383 | \$15,331 | 5.0%  | 17  |
| 107.03 | Tuscaloosa | Vance          | Town of Vance      | 280  | \$307 | \$12,288 | 3.5%  | 10  | \$307   | \$12,288  | 3.5%   | 10   | \$307 | \$12,288 | 3.5%  | 10  |
| 108.02 | Tuscaloosa | Unincorporated | OWTS               | 297  | \$530 | \$21,192 | 12.9% | 38  | \$5,000 | \$200,000 | 100.0% | 297  | \$100 | \$4,000  | 2.6%  | 8   |
| 108.02 | Tuscaloosa | Tuscaloosa     | City of Tuscaloosa | 1538 | \$383 | \$15,331 | 9.0%  | 139 | \$383   | \$15,331  | 9.0%   | 139  | \$383 | \$15,331 | 9.0%  | 139 |
| 108.03 | Tuscaloosa | Unincorporated | OWTS               | 435  | \$530 | \$21,192 | 38.6% | 168 | \$5,000 | \$200,000 | 100.0% | 435  | \$100 | \$4,000  | 7.6%  | 33  |
| 108.03 | Tuscaloosa | Tuscaloosa     | City of Tuscaloosa | 602  | \$383 | \$15,331 | 33.3% | 201 | \$383   | \$15,331  | 33.3%  | 201  | \$383 | \$15,331 | 33.3% | 201 |
| 108.04 | Tuscaloosa | Unincorporated | OWTS               | 632  | \$530 | \$21,192 | 17.7% | 112 | \$5,000 | \$200,000 | 100.0% | 632  | \$100 | \$4,000  | 2.6%  | 16  |
| 108.04 | Tuscaloosa | Tuscaloosa     | City of Tuscaloosa | 308  | \$383 | \$15,331 | 11.4% | 35  | \$383   | \$15,331  | 11.4%  | 35   | \$383 | \$15,331 | 11.4% | 35  |
| 112    | Tuscaloosa | Tuscaloosa     | City of Tuscaloosa | 300  | \$383 | \$15,331 | 39.2% | 118 | \$383   | \$15,331  | 39.2%  | 118  | \$383 | \$15,331 | 39.2% | 118 |

|        |            |                |                                   |      |       |          |       |     |         |           |        |      |       |          |       |     |
|--------|------------|----------------|-----------------------------------|------|-------|----------|-------|-----|---------|-----------|--------|------|-------|----------|-------|-----|
| 114.01 | Tuscaloosa | Tuscaloosa     | City of Tuscaloosa                | 573  | \$383 | \$15,331 | 55.9% | 320 | \$383   | \$15,331  | 55.9%  | 320  | \$383 | \$15,331 | 55.9% | 320 |
| 114.02 | Tuscaloosa | Tuscaloosa     | City of Tuscaloosa                | 921  | \$383 | \$15,331 | 40.2% | 370 | \$383   | \$15,331  | 40.2%  | 370  | \$383 | \$15,331 | 40.2% | 370 |
| 116    | Tuscaloosa | Tuscaloosa     | City of Tuscaloosa                | 1271 | \$383 | \$15,331 | 28.1% | 357 | \$383   | \$15,331  | 28.1%  | 357  | \$383 | \$15,331 | 28.1% | 357 |
| 117.01 | Tuscaloosa | Tuscaloosa     | City of Tuscaloosa                | 923  | \$383 | \$15,331 | 36.9% | 341 | \$383   | \$15,331  | 36.9%  | 341  | \$383 | \$15,331 | 36.9% | 341 |
| 117.03 | Tuscaloosa | Unincorporated | OWTS                              | 717  | \$530 | \$21,192 | 40.0% | 286 | \$5,000 | \$200,000 | 100.0% | 717  | \$100 | \$4,000  | 8.0%  | 57  |
| 117.03 | Tuscaloosa | Tuscaloosa     | City of Tuscaloosa                | 1011 | \$383 | \$15,331 | 32.8% | 332 | \$383   | \$15,331  | 32.8%  | 332  | \$383 | \$15,331 | 32.8% | 332 |
| 118    | Tuscaloosa | Tuscaloosa     | City of Tuscaloosa                | 936  | \$383 | \$15,331 | 32.3% | 302 | \$383   | \$15,331  | 32.3%  | 302  | \$383 | \$15,331 | 32.3% | 302 |
| 119.01 | Tuscaloosa | Tuscaloosa     | City of Tuscaloosa                | 1417 | \$383 | \$15,331 | 17.9% | 253 | \$383   | \$15,331  | 17.9%  | 253  | \$383 | \$15,331 | 17.9% | 253 |
| 119.02 | Tuscaloosa | Tuscaloosa     | City of Tuscaloosa                | 945  | \$383 | \$15,331 | 44.0% | 416 | \$383   | \$15,331  | 44.0%  | 416  | \$383 | \$15,331 | 44.0% | 416 |
| 120    | Tuscaloosa | Tuscaloosa     | City of Tuscaloosa                | 1080 | \$383 | \$15,331 | 40.9% | 442 | \$383   | \$15,331  | 40.9%  | 442  | \$383 | \$15,331 | 40.9% | 442 |
| 121    | Tuscaloosa | Tuscaloosa     | City of Tuscaloosa                | 2291 | \$383 | \$15,331 | 11.4% | 262 | \$383   | \$15,331  | 11.4%  | 262  | \$383 | \$15,331 | 11.4% | 262 |
| 123.03 | Tuscaloosa | Tuscaloosa     | City of Tuscaloosa                | 3197 | \$383 | \$15,331 | 16.4% | 523 | \$383   | \$15,331  | 16.4%  | 523  | \$383 | \$15,331 | 16.4% | 523 |
| 123.04 | Tuscaloosa | Unincorporated | OWTS                              | 857  | \$530 | \$21,192 | 29.0% | 248 | \$5,000 | \$200,000 | 99.9%  | 857  | \$100 | \$4,000  | 4.3%  | 37  |
| 123.04 | Tuscaloosa | Tuscaloosa     | City of Tuscaloosa                | 768  | \$383 | \$15,331 | 19.8% | 152 | \$383   | \$15,331  | 19.8%  | 152  | \$383 | \$15,331 | 19.8% | 152 |
| 123.05 | Tuscaloosa | Unincorporated | OWTS                              | 1074 | \$530 | \$21,192 | 16.6% | 178 | \$5,000 | \$200,000 | 100.0% | 1074 | \$100 | \$4,000  | 0.6%  | 6   |
| 123.05 | Tuscaloosa | Tuscaloosa     | City of Tuscaloosa                | 1145 | \$383 | \$15,331 | 10.2% | 116 | \$383   | \$15,331  | 10.2%  | 116  | \$383 | \$15,331 | 10.2% | 116 |
| 124.03 | Tuscaloosa | Unincorporated | OWTS                              | 230  | \$530 | \$21,192 | 12.3% | 28  | \$5,000 | \$200,000 | 100.0% | 230  | \$100 | \$4,000  | 1.2%  | 3   |
| 124.03 | Tuscaloosa | Tuscaloosa     | City of Tuscaloosa                | 1220 | \$383 | \$15,331 | 7.8%  | 95  | \$383   | \$15,331  | 7.8%   | 95   | \$383 | \$15,331 | 7.8%  | 95  |
| 124.04 | Tuscaloosa | Unincorporated | OWTS                              | 172  | \$530 | \$21,192 | 28.4% | 49  | \$5,000 | \$200,000 | 100.0% | 172  | \$100 | \$4,000  | 3.3%  | 6   |
| 124.04 | Tuscaloosa | Tuscaloosa     | City of Tuscaloosa                | 1094 | \$383 | \$15,331 | 19.4% | 212 | \$383   | \$15,331  | 19.4%  | 212  | \$383 | \$15,331 | 19.4% | 212 |
| 124.05 | Tuscaloosa | Tuscaloosa     | City of Tuscaloosa                | 2391 | \$383 | \$15,331 | 21.3% | 509 | \$383   | \$15,331  | 21.3%  | 509  | \$383 | \$15,331 | 21.3% | 509 |
| 125.01 | Tuscaloosa | Unincorporated | OWTS                              | 228  | \$530 | \$21,192 | 19.1% | 44  | \$5,000 | \$200,000 | 100.0% | 228  | \$100 | \$4,000  | 1.2%  | 3   |
| 125.01 | Tuscaloosa | Tuscaloosa     | City of Tuscaloosa                | 361  | \$383 | \$15,331 | 10.6% | 38  | \$383   | \$15,331  | 10.6%  | 38   | \$383 | \$15,331 | 10.6% | 38  |
| 125.02 | Tuscaloosa | Unincorporated | OWTS                              | 1832 | \$530 | \$21,192 | 4.5%  | 83  | \$5,000 | \$200,000 | 99.9%  | 1832 | \$100 | \$4,000  | 0.8%  | 14  |
| 125.02 | Tuscaloosa | Tuscaloosa     | City of Tuscaloosa                | 300  | \$383 | \$15,331 | 2.6%  | 8   | \$383   | \$15,331  | 2.6%   | 8    | \$383 | \$15,331 | 2.6%  | 8   |
| 125.03 | Tuscaloosa | Unincorporated | OWTS                              | 1354 | \$530 | \$21,192 | 7.6%  | 103 | \$5,000 | \$200,000 | 100.0% | 1354 | \$100 | \$4,000  | 1.4%  | 19  |
| 125.03 | Tuscaloosa | Tuscaloosa     | City of Tuscaloosa                | 134  | \$383 | \$15,331 | 5.8%  | 8   | \$383   | \$15,331  | 5.8%   | 8    | \$383 | \$15,331 | 5.8%  | 8   |
| 126    | Tuscaloosa | Tuscaloosa     | City of Tuscaloosa                | 813  | \$383 | \$15,331 | 39.4% | 320 | \$383   | \$15,331  | 39.4%  | 320  | \$383 | \$15,331 | 39.4% | 320 |
| 127    | Tuscaloosa | Tuscaloosa     | City of Tuscaloosa                | 1519 | \$383 | \$15,331 | 11.8% | 180 | \$383   | \$15,331  | 11.8%  | 180  | \$383 | \$15,331 | 11.8% | 180 |
| 128    | Tuscaloosa | Tuscaloosa     | City of Tuscaloosa                | 779  | \$383 | \$15,331 | 25.7% | 200 | \$383   | \$15,331  | 25.7%  | 200  | \$383 | \$15,331 | 25.7% | 200 |
| 201    | Walker     | Unincorporated | OWTS                              | 298  | \$530 | \$21,192 | 36.5% | 109 | \$5,000 | \$200,000 | 99.9%  | 298  | \$100 | \$4,000  | 2.7%  | 8   |
| 201    | Walker     | Jasper         | Jasper Waterworks and Sewer Board | 885  | \$559 | \$22,368 | 38.1% | 338 | \$559   | \$22,368  | 38.1%  | 338  | \$559 | \$22,368 | 38.1% | 338 |
| 202    | Walker     | Unincorporated | OWTS                              | 223  | \$530 | \$21,192 | 22.1% | 49  | \$5,000 | \$200,000 | 99.8%  | 223  | \$100 | \$4,000  | 3.3%  | 7   |
| 202    | Walker     | Jasper         | Jasper Waterworks and Sewer Board | 1443 | \$559 | \$22,368 | 23.9% | 345 | \$559   | \$22,368  | 23.9%  | 345  | \$559 | \$22,368 | 23.9% | 345 |
| 203    | Walker     | Unincorporated | OWTS                              | 466  | \$530 | \$21,192 | 20.0% | 93  | \$5,000 | \$200,000 | 100.0% | 466  | \$100 | \$4,000  | 3.8%  | 18  |
| 203    | Walker     | Jasper         | Jasper Waterworks and Sewer Board | 2143 | \$559 | \$22,368 | 21.2% | 454 | \$559   | \$22,368  | 21.2%  | 454  | \$559 | \$22,368 | 21.2% | 454 |
| 204    | Walker     | Unincorporated | OWTS                              | 80   | \$530 | \$21,192 | 32.8% | 26  | \$5,000 | \$200,000 | 99.9%  | 80   | \$100 | \$4,000  | 1.8%  | 1   |
| 204    | Walker     | Jasper         | Jasper Waterworks and Sewer Board | 766  | \$559 | \$22,368 | 34.3% | 262 | \$559   | \$22,368  | 34.3%  | 262  | \$559 | \$22,368 | 34.3% | 262 |



|     |        |                |                                                        |      |       |          |       |     |         |           |        |      |       |          |       |     |
|-----|--------|----------------|--------------------------------------------------------|------|-------|----------|-------|-----|---------|-----------|--------|------|-------|----------|-------|-----|
| 206 | Walker | Unincorporated | OWTS                                                   | 989  | \$530 | \$21,192 | 18.7% | 185 | \$5,000 | \$200,000 | 99.9%  | 989  | \$100 | \$4,000  | 2.6%  | 26  |
| 206 | Walker | Jasper         | Jasper Waterworks and Sewer Board                      | 6    | \$559 | \$22,368 | 20.6% | 1   | \$559   | \$22,368  | 20.6%  | 1    | \$559 | \$22,368 | 20.6% | 1   |
| 207 | Walker | Unincorporated | OWTS                                                   | 908  | \$530 | \$21,192 | 17.5% | 159 | \$5,000 | \$200,000 | 100.0% | 908  | \$100 | \$4,000  | 1.7%  | 16  |
| 207 | Walker | Jasper         | Jasper Waterworks and Sewer Board                      | 263  | \$559 | \$22,368 | 19.3% | 51  | \$559   | \$22,368  | 19.3%  | 51   | \$559 | \$22,368 | 19.3% | 51  |
| 208 | Walker | Unincorporated | OWTS                                                   | 2126 | \$530 | \$21,192 | 21.2% | 452 | \$5,000 | \$200,000 | 100.0% | 2126 | \$100 | \$4,000  | 4.8%  | 103 |
| 208 | Walker | Sipsey         | OWTS                                                   | 14   | \$530 | \$21,194 | 21.3% | 3   | \$5,000 | \$200,000 | 100.0% | 14   | \$100 | \$4,000  | 4.8%  | 1   |
| 209 | Walker | Unincorporated | OWTS                                                   | 1824 | \$530 | \$21,192 | 18.8% | 344 | \$5,000 | \$200,000 | 99.9%  | 1824 | \$100 | \$4,000  | 2.2%  | 39  |
| 210 | Walker | Unincorporated | OWTS                                                   | 1371 | \$530 | \$21,192 | 26.0% | 356 | \$5,000 | \$200,000 | 99.9%  | 1371 | \$100 | \$4,000  | 5.2%  | 72  |
| 210 | Walker | Nauvoo         | OWTS                                                   | 23   | \$530 | \$21,194 | 26.0% | 6   | \$5,000 | \$200,000 | 99.9%  | 23   | \$100 | \$4,000  | 5.2%  | 1   |
| 210 | Walker | Carbon Hill    | Carbon Hill Utilities Board                            | 5    | \$361 | \$14,448 | 17.7% | 1   | \$361   | \$14,448  | 17.7%  | 1    | \$361 | \$14,448 | 17.7% | 1   |
| 211 | Walker | Unincorporated | OWTS                                                   | 1138 | \$530 | \$21,192 | 29.3% | 333 | \$5,000 | \$200,000 | 100.0% | 1138 | \$100 | \$4,000  | 3.9%  | 44  |
| 211 | Walker | Kansas         | OWTS                                                   | 27   | \$530 | \$21,194 | 29.3% | 8   | \$5,000 | \$200,000 | 100.0% | 27   | \$100 | \$4,000  | 3.9%  | 1   |
| 211 | Walker | Eldridge       | OWTS                                                   | 18   | \$530 | \$21,194 | 29.3% | 5   | \$5,000 | \$200,000 | 100.0% | 18   | \$100 | \$4,000  | 3.9%  | 1   |
| 211 | Walker | Carbon Hill    | Carbon Hill Utilities Board                            | 233  | \$361 | \$14,448 | 16.2% | 38  | \$361   | \$14,448  | 16.2%  | 38   | \$361 | \$14,448 | 16.2% | 38  |
| 212 | Walker | Unincorporated | OWTS                                                   | 917  | \$530 | \$21,192 | 16.2% | 148 | \$5,000 | \$200,000 | 99.9%  | 917  | \$100 | \$4,000  | 1.8%  | 16  |
| 212 | Walker | Jasper         | Jasper Waterworks and Sewer Board                      | 142  | \$559 | \$22,368 | 17.3% | 25  | \$559   | \$22,368  | 17.3%  | 25   | \$559 | \$22,368 | 17.3% | 25  |
| 212 | Walker | Carbon Hill    | Carbon Hill Utilities Board                            | 24   | \$361 | \$14,448 | 9.6%  | 2   | \$361   | \$14,448  | 9.6%   | 2    | \$361 | \$14,448 | 9.6%  | 2   |
| 213 | Walker | Unincorporated | OWTS                                                   | 1118 | \$530 | \$21,192 | 21.6% | 241 | \$5,000 | \$200,000 | 99.8%  | 1118 | \$100 | \$4,000  | 4.8%  | 53  |
| 213 | Walker | Oakman         | Town of Oakman                                         | 285  | \$392 | \$15,696 | 16.2% | 46  | \$392   | \$15,696  | 16.2%  | 46   | \$392 | \$15,696 | 16.2% | 46  |
| 214 | Walker | Unincorporated | OWTS                                                   | 1026 | \$530 | \$21,192 | 20.1% | 207 | \$5,000 | \$200,000 | 100.0% | 1026 | \$100 | \$4,000  | 2.8%  | 29  |
| 214 | Walker | Parrish        | The Water Works and Sewer Board of the Town of Parrish | 353  | \$481 | \$19,224 | 17.3% | 61  | \$481   | \$19,224  | 17.3%  | 61   | \$481 | \$19,224 | 17.3% | 61  |
| 215 | Walker | Unincorporated | OWTS                                                   | 763  | \$530 | \$21,192 | 29.4% | 225 | \$5,000 | \$200,000 | 99.9%  | 763  | \$100 | \$4,000  | 6.2%  | 47  |
| 215 | Walker | Cordova        | Cordova Water Works and Gas Board                      | 586  | \$480 | \$19,186 | 27.4% | 160 | \$480   | \$19,186  | 27.4%  | 160  | \$480 | \$19,186 | 27.4% | 160 |
| 216 | Walker | Unincorporated | OWTS                                                   | 663  | \$530 | \$21,192 | 31.3% | 208 | \$5,000 | \$200,000 | 100.0% | 663  | \$100 | \$4,000  | 3.5%  | 23  |
| 217 | Walker | Unincorporated | OWTS                                                   | 1375 | \$530 | \$21,192 | 24.9% | 343 | \$5,000 | \$200,000 | 100.0% | 1375 | \$100 | \$4,000  | 3.8%  | 53  |
| 217 | Walker | Sumiton        | Sumiton Water Works Board                              | 135  | \$489 | \$19,560 | 22.1% | 30  | \$489   | \$19,560  | 22.1%  | 30   | \$489 | \$19,560 | 22.1% | 30  |
| 217 | Walker | Cordova        | Cordova Water Works and Gas Board                      | 2    | \$480 | \$19,186 | 21.4% | 0   | \$480   | \$19,186  | 21.4%  | 0    | \$480 | \$19,186 | 21.4% | 0   |
| 217 | Walker | Dora           | East Walker Sewer Authority                            | 231  | \$474 | \$18,960 | 21.1% | 49  | \$474   | \$18,960  | 21.1%  | 49   | \$474 | \$18,960 | 21.1% | 49  |
| 218 | Walker | Unincorporated | OWTS                                                   | 1146 | \$530 | \$21,192 | 26.2% | 301 | \$5,000 | \$200,000 | 99.9%  | 1146 | \$100 | \$4,000  | 3.5%  | 40  |
| 218 | Walker | Sumiton        | Sumiton Water Works Board                              | 263  | \$489 | \$19,560 | 24.1% | 63  | \$489   | \$19,560  | 24.1%  | 63   | \$489 | \$19,560 | 24.1% | 63  |

|      |            |                |                                           |      |         |          |       |     |          |           |        |      |       |          |       |     |
|------|------------|----------------|-------------------------------------------|------|---------|----------|-------|-----|----------|-----------|--------|------|-------|----------|-------|-----|
| 219  | Walker     | Unincorporated | OWTS                                      | 742  | \$530   | \$21,192 | 18.0% | 134 | \$5,000  | \$200,000 | 99.9%  | 742  | \$100 | \$4,000  | 2.8%  | 21  |
| 439  | Washington | Unincorporated | OWTS                                      | 799  | \$530   | \$21,192 | 26.8% | 214 | \$5,000  | \$200,000 | 100.0% | 799  | \$100 | \$4,000  | 5.5%  | 44  |
| 439  | Washington | Millry         | Town of Millry                            | 294  | \$240   | \$9,600  | 13.2% | 39  | \$240    | \$9,600   | 13.2%  | 39   | \$240 | \$9,600  | 13.2% | 39  |
| 440  | Washington | Unincorporated | OWTS                                      | 1202 | \$530   | \$21,192 | 26.4% | 318 | \$5,000  | \$200,000 | 99.9%  | 1202 | \$100 | \$4,000  | 3.9%  | 47  |
| 440  | Washington | Hobson         | OWTS                                      | 17   | \$530   | \$21,194 | 26.4% | 4   | \$5,000  | \$200,000 | 99.9%  | 17   | \$100 | \$4,000  | 3.9%  | 1   |
| 440  | Washington | Chatom         | The Utilities Board of the Town of Chatom | 235  | \$336   | \$13,440 | 17.3% | 41  | \$336    | \$13,440  | 17.3%  | 41   | \$336 | \$13,440 | 17.3% | 41  |
| 441  | Washington | Unincorporated | OWTS                                      | 1240 | \$530   | \$21,192 | 22.0% | 272 | \$5,000  | \$200,000 | 99.9%  | 1240 | \$100 | \$4,000  | 4.8%  | 59  |
| 441  | Washington | Jackson        | Jackson Water Works & Sewer Board         | 1    | \$372   | \$14,880 | 14.3% | 0   | \$372    | \$14,880  | 14.3%  | 0    | \$372 | \$14,880 | 14.3% | 0   |
| 442  | Washington | Unincorporated | OWTS                                      | 1312 | \$530   | \$21,192 | 24.9% | 326 | \$5,000  | \$200,000 | 99.9%  | 1312 | \$100 | \$4,000  | 3.2%  | 41  |
| 442  | Washington | McIntosh       | OWTS                                      | 8    | \$530   | \$21,194 | 24.9% | 2   | \$5,000  | \$200,000 | 99.9%  | 8    | \$100 | \$4,000  | 3.2%  | 0   |
| 443  | Washington | Unincorporated | OWTS                                      | 882  | \$530   | \$21,192 | 27.2% | 240 | \$5,000  | \$200,000 | 99.9%  | 882  | \$100 | \$4,000  | 6.1%  | 54  |
| 347  | Wilcox     | Unincorporated | OWTS                                      | 523  | \$1,819 | \$72,778 | 92.7% | 485 | \$20,000 | \$800,000 | 100.0% | 523  | \$100 | \$4,000  | 9.0%  | 47  |
| 348  | Wilcox     | Camden         | City of Camden                            | 1644 | \$417   | \$16,666 | 29.3% | 482 | \$417    | \$16,666  | 29.3%  | 482  | \$417 | \$16,666 | 29.3% | 482 |
| 351  | Wilcox     | Unincorporated | OWTS                                      | 875  | \$1,819 | \$72,778 | 84.7% | 741 | \$20,000 | \$800,000 | 99.9%  | 875  | \$100 | \$4,000  | 7.0%  | 61  |
| 351  | Wilcox     | Yellow Bluff   | OWTS                                      | 3    | \$1,819 | \$72,776 | 84.7% | 2   | \$20,000 | \$800,000 | 99.9%  | 3    | \$100 | \$4,000  | 7.0%  | 0   |
| 351  | Wilcox     | Pine Hill      | Town of Pine Hill                         | 259  | \$448   | \$17,928 | 28.4% | 73  | \$448    | \$17,928  | 28.4%  | 73   | \$448 | \$17,928 | 28.4% | 73  |
| 352  | Wilcox     | Unincorporated | OWTS                                      | 545  | \$1,819 | \$72,778 | 81.0% | 441 | \$20,000 | \$800,000 | 100.0% | 545  | \$100 | \$4,000  | 3.3%  | 18  |
| 352  | Wilcox     | Pine Apple     | OWTS                                      | 5    | \$1,819 | \$72,776 | 81.0% | 4   | \$20,000 | \$800,000 | 100.0% | 5    | \$100 | \$4,000  | 3.3%  | 0   |
| 352  | Wilcox     | Oak Hill       | OWTS                                      | 1    | \$1,819 | \$72,776 | 81.0% | 1   | \$20,000 | \$800,000 | 100.0% | 1    | \$100 | \$4,000  | 3.3%  | 0   |
| 9655 | Winston    | Unincorporated | OWTS                                      | 784  | \$530   | \$21,192 | 23.0% | 180 | \$5,000  | \$200,000 | 100.0% | 784  | \$100 | \$4,000  | 3.0%  | 24  |
| 9655 | Winston    | Addison        | Town of Addison                           | 211  | \$514   | \$20,544 | 22.4% | 47  | \$514    | \$20,544  | 22.4%  | 47   | \$514 | \$20,544 | 22.4% | 47  |
| 9655 | Winston    | Unincorporated | OWTS                                      | 1214 | \$530   | \$21,192 | 25.1% | 304 | \$5,000  | \$200,000 | 100.0% | 1214 | \$100 | \$4,000  | 1.9%  | 23  |
| 9655 | Winston    | Arley          | OWTS                                      | 45   | \$530   | \$21,194 | 25.1% | 11  | \$5,000  | \$200,000 | 100.0% | 45   | \$100 | \$4,000  | 1.9%  | 1   |
| 9655 | Winston    | Addison        | Town of Addison                           | 6    | \$514   | \$20,544 | 23.5% | 1   | \$514    | \$20,544  | 23.5%  | 1    | \$514 | \$20,544 | 23.5% | 1   |
| 9655 | Winston    | Unincorporated | OWTS                                      | 964  | \$530   | \$21,192 | 25.9% | 249 | \$5,000  | \$200,000 | 100.0% | 964  | \$100 | \$4,000  | 3.2%  | 31  |
| 9655 | Winston    | Arley          | OWTS                                      | 30   | \$530   | \$21,194 | 25.9% | 8   | \$5,000  | \$200,000 | 100.0% | 30   | \$100 | \$4,000  | 3.2%  | 1   |
| 9655 | Winston    | Addison        | Town of Addison                           | 116  | \$514   | \$20,544 | 24.7% | 29  | \$514    | \$20,544  | 24.7%  | 29   | \$514 | \$20,544 | 24.7% | 29  |
| 9656 | Winston    | Unincorporated | OWTS                                      | 1696 | \$530   | \$21,192 | 31.7% | 538 | \$5,000  | \$200,000 | 100.0% | 1696 | \$100 | \$4,000  | 3.6%  | 61  |
| 9656 | Winston    | Double Springs | Double Springs Water and Sewer Board      | 471  | \$540   | \$21,610 | 32.6% | 153 | \$540    | \$21,610  | 32.6%  | 471  | \$540 | \$21,610 | 32.6% | 153 |
| 9657 | Winston    | Unincorporated | OWTS                                      | 674  | \$530   | \$21,192 | 25.9% | 175 | \$5,000  | \$200,000 | 99.9%  | 674  | \$100 | \$4,000  | 2.9%  | 19  |
| 9657 | Winston    | Haleyville     | Haleyville Waterworks & Sewer Board       | 882  | \$349   | \$13,954 | 12.3% | 109 | \$349    | \$13,954  | 12.3%  | 882  | \$349 | \$13,954 | 12.3% | 109 |
| 9658 | Winston    | Unincorporated | OWTS                                      | 1009 | \$530   | \$21,192 | 33.4% | 337 | \$5,000  | \$200,000 | 100.0% | 1009 | \$100 | \$4,000  | 2.3%  | 23  |
| 9658 | Winston    | Haleyville     | Haleyville Waterworks & Sewer Board       | 630  | \$349   | \$13,954 | 17.7% | 112 | \$349    | \$13,954  | 17.7%  | 630  | \$349 | \$13,954 | 17.7% | 112 |
| 9659 | Winston    | Unincorporated | OWTS                                      | 765  | \$530   | \$21,192 | 29.2% | 223 | \$5,000  | \$200,000 | 100.0% | 765  | \$100 | \$4,000  | 5.2%  | 40  |
| 9659 | Winston    | Lynn           | OWTS                                      | 91   | \$530   | \$21,194 | 29.2% | 27  | \$5,000  | \$200,000 | 100.0% | 91   | \$100 | \$4,000  | 5.2%  | 5   |
| 9659 | Winston    | Natural Bridge | OWTS                                      | 4    | \$530   | \$21,194 | 29.2% | 1   | \$5,000  | \$200,000 | 100.0% | 4    | \$100 | \$4,000  | 5.2%  | 0   |

Table Abbreviations: Est. – Estimated; No.- Number; HH- Households; WW- Wastewater; Afford.- Affordable; TH- Threshold

## References

- AWWA, and Association of Metropolitan Water Agencies. 2020. “The Financial Impact of the COVID-19 Crisis on U.S. Drinking Water Utilities.” Accessed June 4, 2023. [https://www.awwa.org/Portals/0/AWWA/Communications/AWWA-AMWA-COVID-Report\\_2020-04.pdf](https://www.awwa.org/Portals/0/AWWA/Communications/AWWA-AMWA-COVID-Report_2020-04.pdf).
- Belzer, R. B. 2020. “Achieving Economically Feasible Drinking Water Regulation.” *J. Benefit-Cost Anal.*, 11 (2): 294–318. Cambridge University Press. <https://doi.org/10.1017/BCA.2019.21>.
- Mack, E. A., and S. Wrase. 2017. “A Burgeoning Crisis? A Nationwide Assessment of the Geography of Water Affordability in the United States.” *PLoS One*, 12 (1): e0169488. Public Library of Science. <https://doi.org/10.1371/JOURNAL.PONE.0169488>.
- Teodoro, M. P. 2018. “Measuring Household Affordability for Water and Sewer Utilities.” *J. Am. Water Works Assoc.*, 110 (1): 13–24. John Wiley & Sons, Ltd. <https://doi.org/10.5942/JAWWA.2018.110.0002>.
- Teodoro, M. P., and R. R. Saywitz. 2020. “Water and sewer affordability in the United States: a 2019 update.” *AWWA Water Sci.*, 2 (2): e1176. John Wiley & Sons, Ltd. <https://doi.org/10.1002/AWS2.1176>.
- U.S. EPA. 2006. “Small Drinking Water Systems Variances-Revision of Existing National-Level Affordability Methodology and Methodology To Identify Variance Technologies That Are Protective of Public Health.” *Fed. Regist.* Accessed January 23, 2023. <https://www.federalregister.gov/documents/2006/03/02/06-1917/small-drinking-water-systems-variances-revision-of-existing-national-level-affordability-methodology>.
- U.S. EPA National Drinking Water Advisory Council. 2003. “Recommendations of the National Drinking Water Advisory Council to U.S. EPA on Its National Small Systems Affordability Criteria.” Accessed June 4, 2023. <https://www.epa.gov/sdwa/recommendations-national-drinking-water-advisory-council-us-epa-its-national-small-systems>.
- U.S. EPA Science Advisory Board. 1998. *SAB Advisory on the National-Level Affordability Criteria and Technologies for Small Systems Under the 1996 Amendments to the Safe Drinking Water Act (EPA-SAB-DWC-ADV-98-001)*.
- U.S. EPA Science Advisory Board. 2002. *Affordability Criteria for Small Drinking Water Systems: An EPA Science Advisory Board Report (EPA-SAB-EEAC-03-004)*.
- Wescoat, J. L., L. Headington, and R. Theobald. 2007. “Water and poverty in the United States.” *Geoforum*, 38 (5): 801–814. Pergamon. <https://doi.org/10.1016/J.GEOFORUM.2006.08.007>.
